# Supplementary material for: Spectroscopic and Structural Study of a New Conducting Pyrazolium Salt
Source: MDPI journal article supplement (doi:10.3390/molecules26154657), 2021-07-31
Supplement: s1 [file s1]

## Supplementary Materials

### Spectroscopic and structural study of a new conducting pyrazolium salt

Sylvia Zięba <sup>1</sup>, Agata Piotrowska <sup>2</sup>, Adam Mizera <sup>1</sup>, Paweł Ławniczak <sup>1</sup>, Karolina H. Markiewicz <sup>3</sup>, Andrzej Gzella <sup>4</sup>, Alina T. Dubis <sup>3</sup> and Andrzej Łapiński <sup>1,\*</sup>

<sup>1</sup> Institute of Molecular Physics Polish Academy of Sciences, Smoluchowskiego 17, 60-179 Poznań, Poland

<sup>2</sup> Poznań University of Technology, Piotrowo 3, 60-965 Poznań Poland

<sup>3</sup> Faculty of Chemistry University of Białystok, Ciołkowskiego 1K, 15-245 Białystok, Poland

<sup>4</sup> Department of Organic Chemistry Poznań University of Medical Sciences, Grunwaldzka 6, 60-780 Poznań, Poland

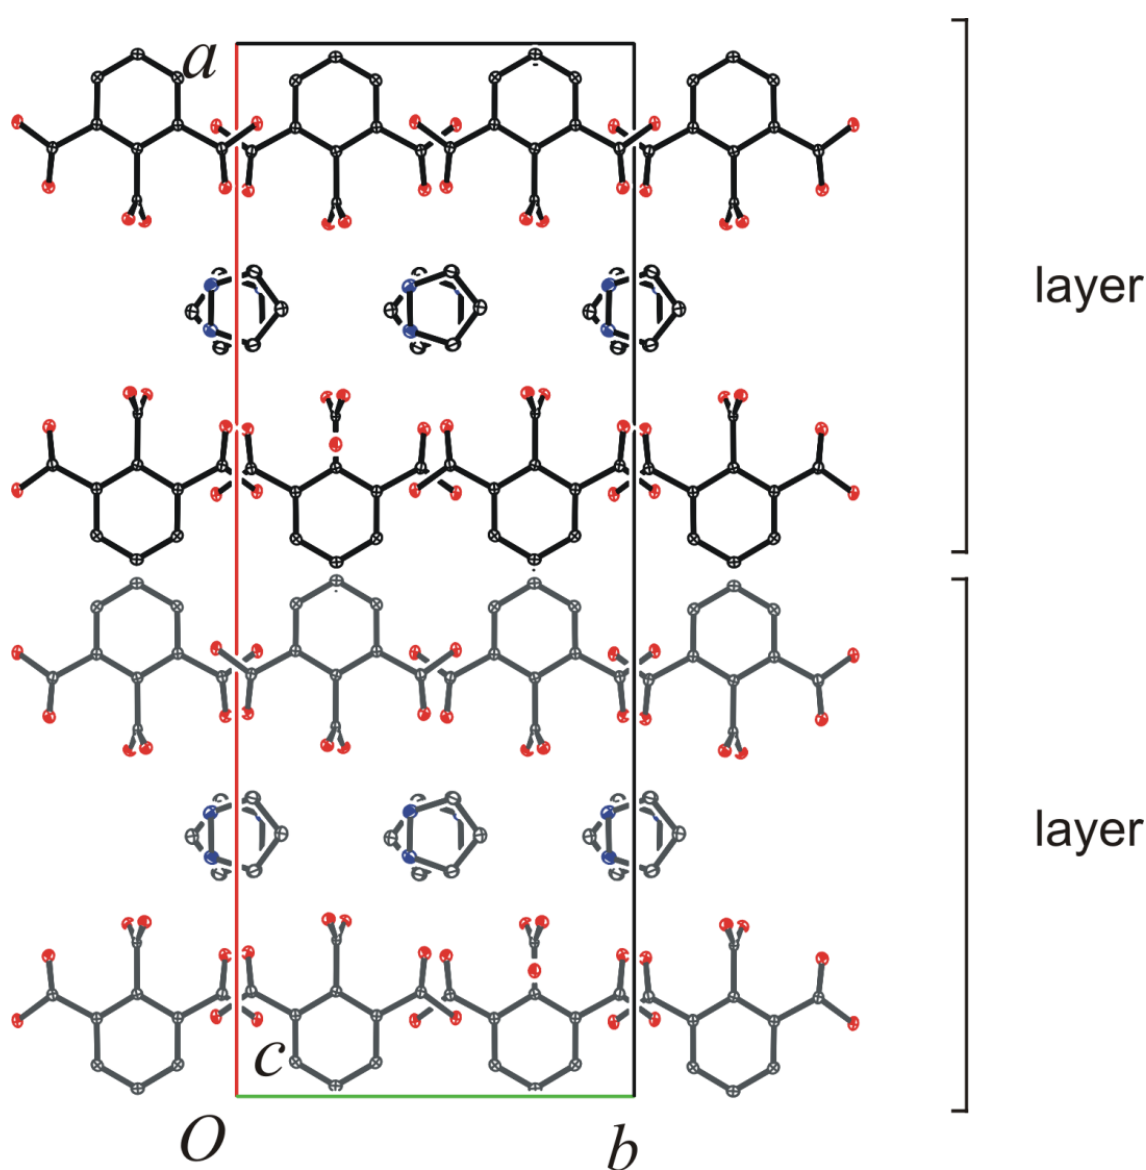

**Figure S1.** The molecular packing in the crystal PyrHemxH<sub>2</sub>O, showing sheets (layers) parallel to the *bc* plane. The H atoms not involved in hydrogen bonds have been omitted for clarity.

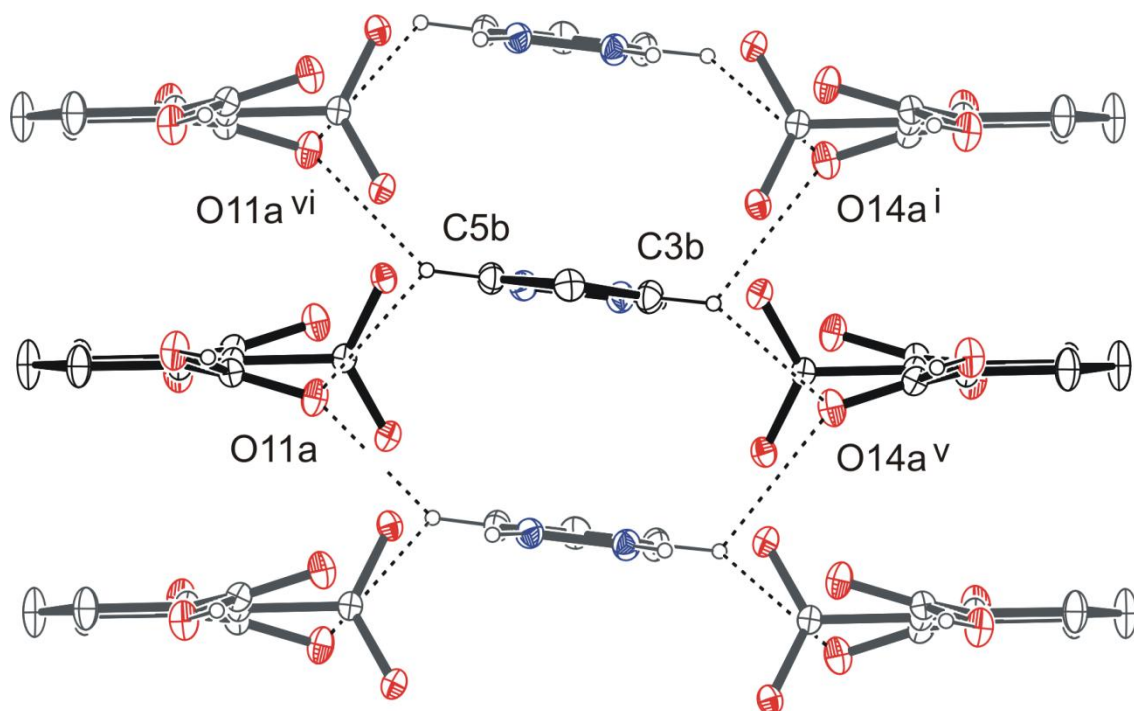

**Figure S2.** Non-classic C-H...O hydrogen bonds linking types into layers parallel to the *bc* plane. The symmetry codes are explained in Table 1

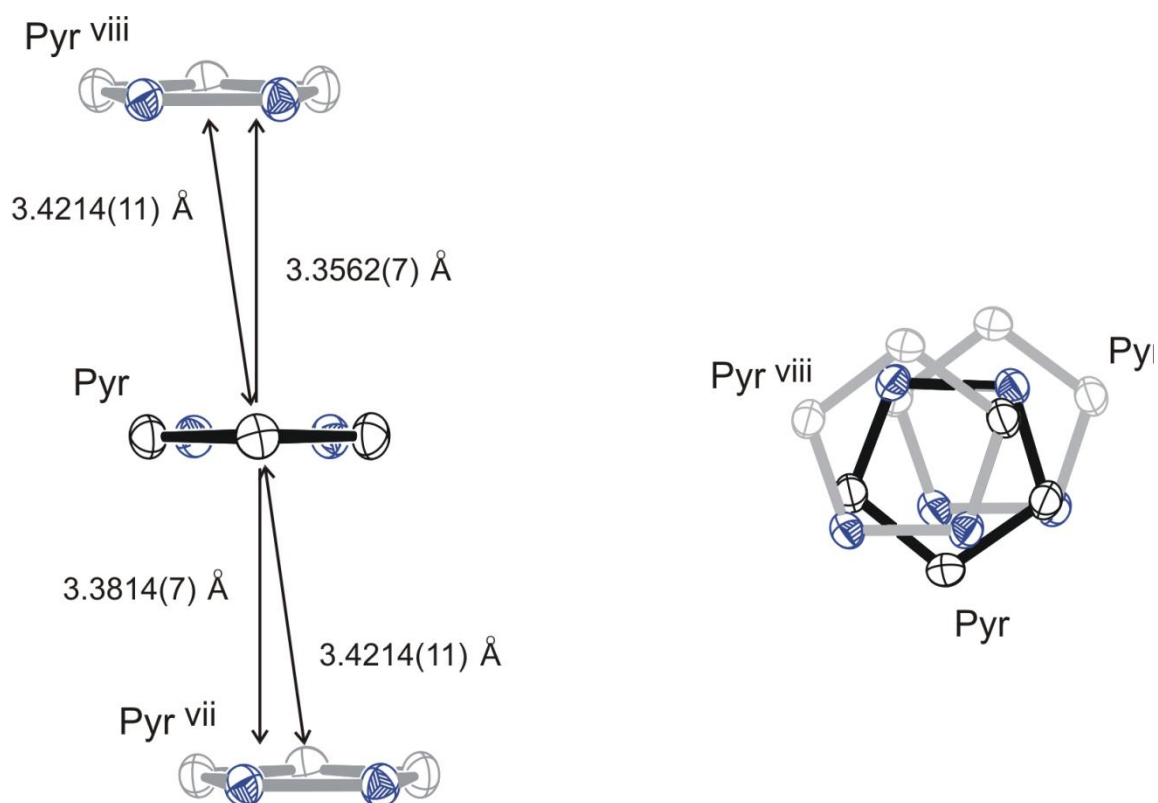

**Figure S3.**  $\pi \cdots \pi$  interactions between pyrazolium rings. The molecules are shown in two orthogonal projections. Hydrogen atoms have been omitted for clarity.

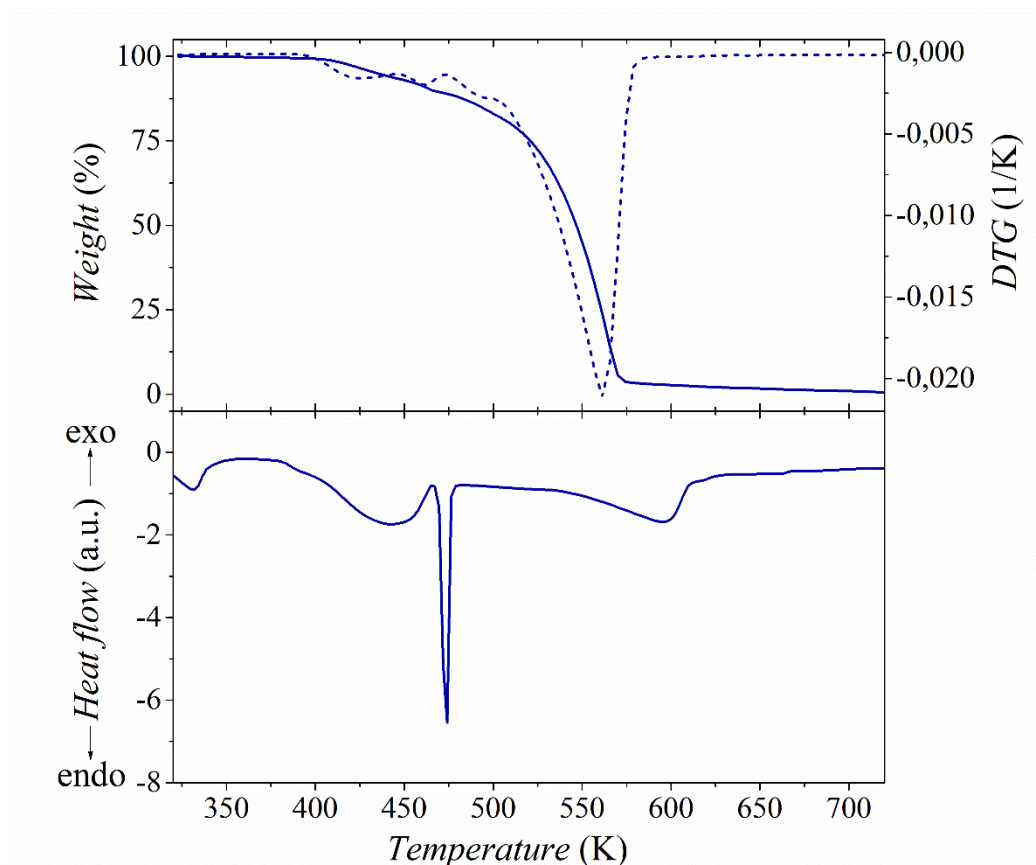

**Figure S4.** TGA/DTG curves (top panel) and DSC curves (bottom panel) of Hem×H<sub>2</sub>O.

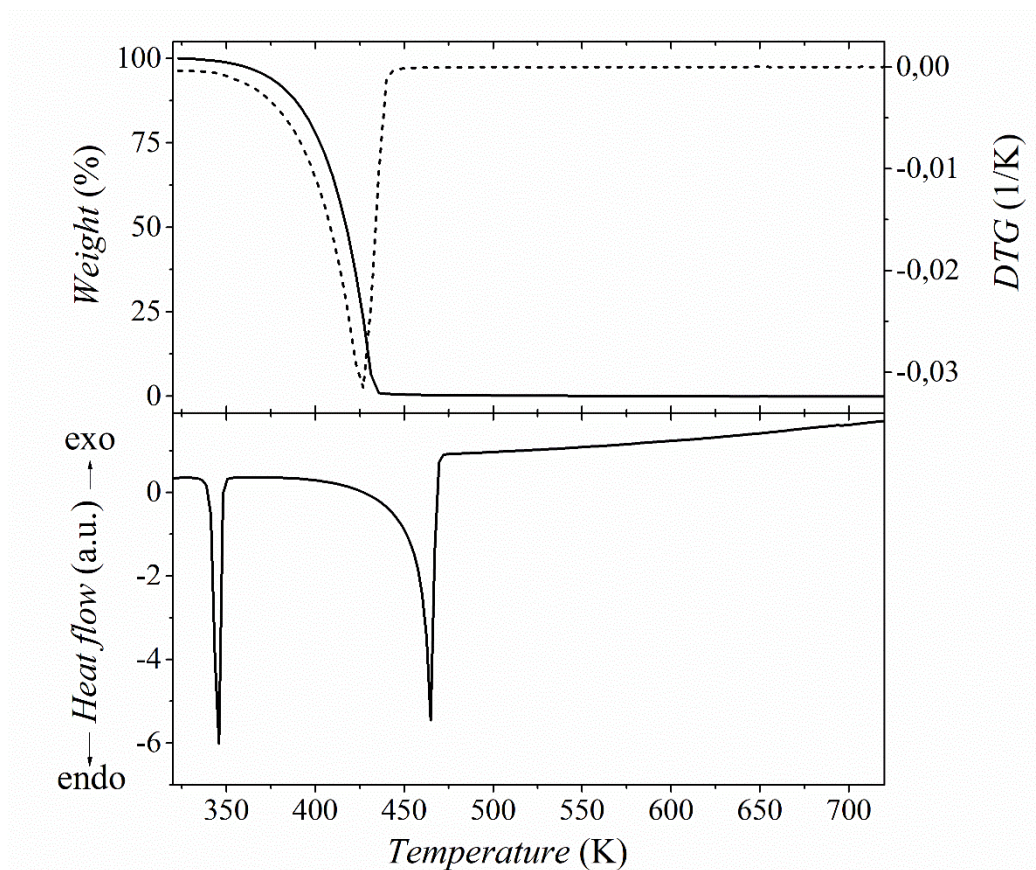

**Figure S5.** TGA/DTG curves (top panel) and DSC curves (bottom panel) of Pyr.

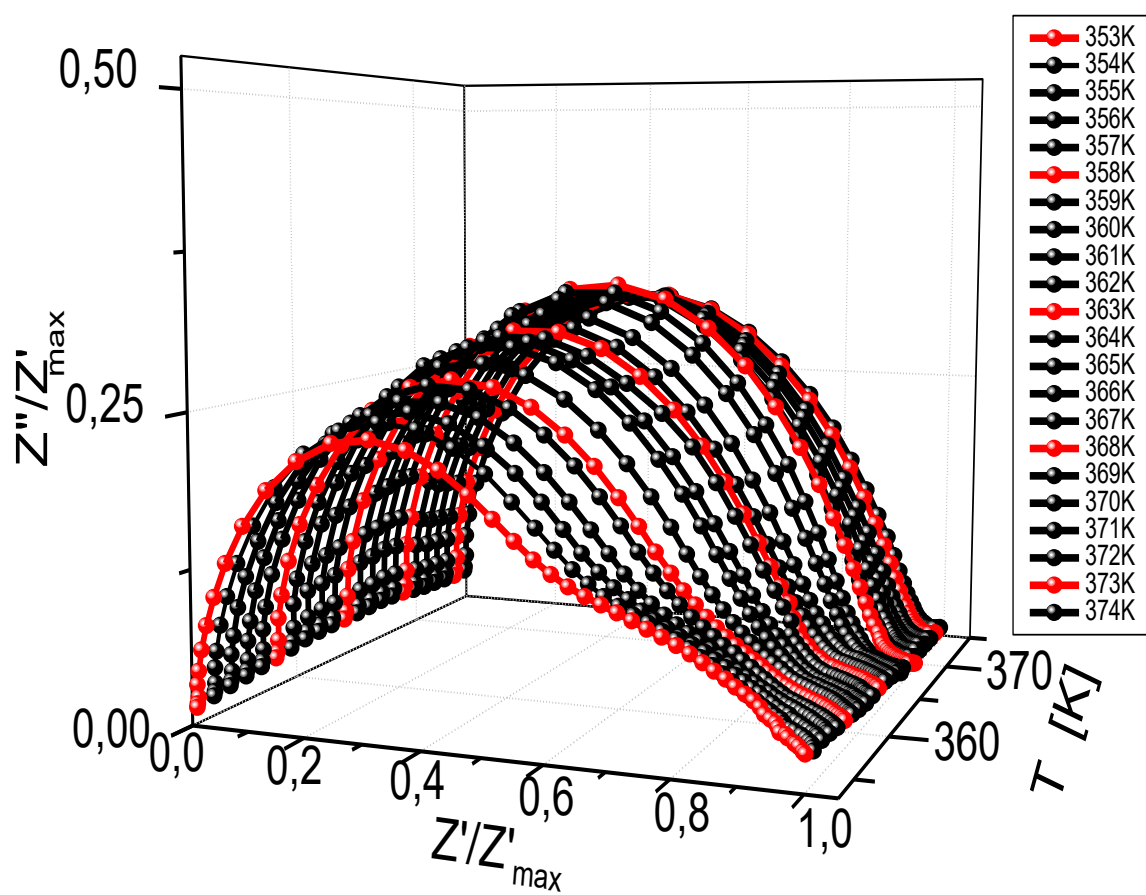

**Figure S6.** Scaled complex impedance plots  $-Z''(Z')$  plot for the measured pyrazolium hemimellitate.

**Table S1.** Experimental and calculated (WB97XD/6-311++G(d,p)) IR stretching and bending frequencies of the O-H, N-H, and C=O groups.

|                                                                                     | Selected experimental and calculated IR frequencies [cm <sup>-1</sup> ] |              |                  |                                      |                                      |                      |                  |        |                  |        |                  |        |
|-------------------------------------------------------------------------------------|-------------------------------------------------------------------------|--------------|------------------|--------------------------------------|--------------------------------------|----------------------|------------------|--------|------------------|--------|------------------|--------|
|                                                                                     | Exp.                                                                    | Calc.*       | Exp.             | Calc.*                               | Exp.                                 | Calc.*               | Exp.             | Calc.* | Exp.             | Calc.* | Exp.             | Calc.* |
|                                                                                     | ν <sub>N-H</sub>                                                        |              | ν <sub>O-H</sub> |                                      | ν <sub>C=O or COO<sup>-</sup></sub>  |                      | δ <sub>O-H</sub> |        | γ <sub>O-H</sub> |        | γ <sub>N-H</sub> |        |
|    | 3425                                                                    | 3548         |                  |                                      |                                      |                      |                  |        |                  |        |                  | 527    |
|    |                                                                         | 3501<br>3491 |                  |                                      |                                      |                      |                  |        |                  |        |                  | 548    |
|    |                                                                         |              |                  | 3716<br>3683<br>3673                 |                                      | 1808<br>1779<br>1771 |                  |        |                  |        |                  |        |
|   |                                                                         |              | 3400-<br>2500    | 3306<br>3583<br>3677<br>3684<br>3799 | 1727<br>1705<br>1701<br>1697<br>1685 | 1735 1771<br>1785    |                  | 1552   | 898              | 889    |                  |        |
|  |                                                                         |              |                  | 3695                                 |                                      | 1750<br>1747<br>1670 |                  |        |                  |        |                  |        |
|  |                                                                         |              |                  | 3395<br>3143                         |                                      | 1747<br>1731<br>1668 |                  | 1623   | 898              | 939    |                  |        |
|  |                                                                         | 3327         |                  | 3687<br>3686<br>2897                 |                                      | 1780<br>1767<br>1723 |                  |        |                  | 964    |                  |        |

\* scaling factor of 0.957 was used

## Supplementary data – Theoretical Calculation of vibrational modes (wb97xd\_6311++G\_dp)

pyrazole PYR

Harmonic frequencies (cm<sup>-1</sup>), IR intensities (KM/Mole), Raman scattering activities (A<sup>4</sup>/AMU), depolarization ratios for plane and unpolarized incident light, reduced masses (AMU), force constants (mDyne/A), and normal coordinates:

| 1              |    |          |       |       | 2     |       |          |       |       | 3     |  |           |  |  |  |  |
|----------------|----|----------|-------|-------|-------|-------|----------|-------|-------|-------|--|-----------|--|--|--|--|
| A              |    |          |       |       | A     |       |          |       |       | A     |  |           |  |  |  |  |
| Frequencies -- |    | 551.0021 |       |       |       |       | 639.8957 |       |       |       |  | 696.5277  |  |  |  |  |
| Red. masses -- |    | 1.7096   |       |       |       |       | 2.3982   |       |       |       |  | 2.8376    |  |  |  |  |
| Frc consts --  |    | 0.3058   |       |       |       |       | 0.5786   |       |       |       |  | 0.8111    |  |  |  |  |
| IR Inten --    |    | 65.7180  |       |       |       |       | 0.0009   |       |       |       |  | 23.9088   |  |  |  |  |
| Raman Activ -- |    | 0.3548   |       |       |       |       | 0.0017   |       |       |       |  | 0.2578    |  |  |  |  |
| Depolar (P) -- |    | 0.7489   |       |       |       |       | 0.7491   |       |       |       |  | 0.7500    |  |  |  |  |
| Depolar (U) -- |    | 0.8564   |       |       |       |       | 0.8566   |       |       |       |  | 0.8571    |  |  |  |  |
| Atom           | AN | X        | Y     | Z     | X     | Y     | Z        | X     | Y     | Z     |  |           |  |  |  |  |
| 1              | 6  | 0.00     | 0.00  | 0.08  | 0.00  | 0.00  | 0.20     | 0.00  | 0.00  | 0.08  |  |           |  |  |  |  |
| 2              | 1  | 0.00     | 0.00  | 0.22  | 0.00  | 0.00  | 0.53     | 0.00  | 0.00  | 0.16  |  |           |  |  |  |  |
| 3              | 6  | 0.00     | 0.00  | -0.01 | 0.00  | 0.00  | -0.25    | 0.00  | 0.00  | 0.04  |  |           |  |  |  |  |
| 4              | 1  | 0.00     | 0.00  | -0.09 | 0.00  | 0.00  | -0.28    | 0.00  | 0.00  | 0.26  |  |           |  |  |  |  |
| 5              | 6  | 0.00     | 0.00  | 0.00  | 0.00  | 0.00  | 0.14     | 0.00  | 0.00  | -0.21 |  |           |  |  |  |  |
| 6              | 1  | 0.00     | 0.00  | -0.02 | 0.00  | 0.00  | 0.47     | 0.00  | 0.00  | -0.33 |  |           |  |  |  |  |
| 7              | 7  | 0.00     | 0.00  | -0.21 | 0.00  | 0.00  | -0.06    | 0.00  | 0.00  | -0.14 |  |           |  |  |  |  |
| 8              | 7  | 0.00     | 0.00  | 0.08  | 0.00  | 0.00  | -0.03    | 0.00  | 0.00  | 0.28  |  |           |  |  |  |  |
| 9              | 1  | 0.00     | 0.00  | 0.94  | 0.00  | 0.00  | -0.54    | 0.00  | 0.00  | -0.80 |  |           |  |  |  |  |
| 4              |    |          |       |       | 5     |       |          |       |       | 6     |  |           |  |  |  |  |
| A              |    |          |       |       | A     |       |          |       |       | A     |  |           |  |  |  |  |
| Frequencies -- |    | 769.7786 |       |       |       |       | 862.9843 |       |       |       |  | 906.9295  |  |  |  |  |
| Red. masses -- |    | 1.2012   |       |       |       |       | 1.2435   |       |       |       |  | 1.3550    |  |  |  |  |
| Frc consts --  |    | 0.4194   |       |       |       |       | 0.5457   |       |       |       |  | 0.6567    |  |  |  |  |
| IR Inten --    |    | 104.4112 |       |       |       |       | 8.1462   |       |       |       |  | 2.3796    |  |  |  |  |
| Raman Activ -- |    | 0.1196   |       |       |       |       | 0.2676   |       |       |       |  | 0.3782    |  |  |  |  |
| Depolar (P) -- |    | 0.7492   |       |       |       |       | 0.7497   |       |       |       |  | 0.7498    |  |  |  |  |
| Depolar (U) -- |    | 0.8566   |       |       |       |       | 0.8569   |       |       |       |  | 0.8570    |  |  |  |  |
| Atom           | AN | X        | Y     | Z     | X     | Y     | Z        | X     | Y     | Z     |  |           |  |  |  |  |
| 1              | 6  | 0.00     | 0.00  | 0.11  | 0.00  | 0.00  | -0.10    | 0.00  | 0.00  | 0.06  |  |           |  |  |  |  |
| 2              | 1  | 0.00     | 0.00  | -0.61 | 0.00  | 0.00  | 0.62     | 0.00  | 0.00  | -0.38 |  |           |  |  |  |  |
| 3              | 6  | 0.00     | 0.00  | 0.06  | 0.00  | 0.00  | 0.05     | 0.00  | 0.00  | -0.12 |  |           |  |  |  |  |
| 4              | 1  | 0.00     | 0.00  | -0.73 | 0.00  | 0.00  | -0.39    | 0.00  | 0.00  | 0.57  |  |           |  |  |  |  |
| 5              | 6  | 0.00     | 0.00  | 0.02  | 0.00  | 0.00  | 0.10     | 0.00  | 0.00  | 0.12  |  |           |  |  |  |  |
| 6              | 1  | 0.00     | 0.00  | -0.22 | 0.00  | 0.00  | -0.65    | 0.00  | 0.00  | -0.71 |  |           |  |  |  |  |
| 7              | 7  | 0.00     | 0.00  | -0.03 | 0.00  | 0.00  | -0.01    | 0.00  | 0.00  | -0.01 |  |           |  |  |  |  |
| 8              | 7  | 0.00     | 0.00  | -0.01 | 0.00  | 0.00  | 0.00     | 0.00  | 0.00  | -0.01 |  |           |  |  |  |  |
| 9              | 1  | 0.00     | 0.00  | -0.13 | 0.00  | 0.00  | -0.12    | 0.00  | 0.00  | 0.02  |  |           |  |  |  |  |
| 7              |    |          |       |       | 8     |       |          |       |       | 9     |  |           |  |  |  |  |
| A              |    |          |       |       | A     |       |          |       |       | A     |  |           |  |  |  |  |
| Frequencies -- |    | 930.8108 |       |       |       |       | 946.8630 |       |       |       |  | 1056.2637 |  |  |  |  |
| Red. masses -- |    | 5.6542   |       |       |       |       | 3.6028   |       |       |       |  | 1.4588    |  |  |  |  |
| Frc consts --  |    | 2.8863   |       |       |       |       | 1.9031   |       |       |       |  | 0.9589    |  |  |  |  |
| IR Inten --    |    | 9.4544   |       |       |       |       | 3.5992   |       |       |       |  | 6.2431    |  |  |  |  |
| Raman Activ -- |    | 3.3064   |       |       |       |       | 1.1856   |       |       |       |  | 1.5429    |  |  |  |  |
| Depolar (P) -- |    | 0.7341   |       |       |       |       | 0.6833   |       |       |       |  | 0.5783    |  |  |  |  |
| Depolar (U) -- |    | 0.8467   |       |       |       |       | 0.8119   |       |       |       |  | 0.7328    |  |  |  |  |
| Atom           | AN | X        | Y     | Z     | X     | Y     | Z        | X     | Y     | Z     |  |           |  |  |  |  |
| 1              | 6  | 0.22     | 0.12  | 0.00  | 0.13  | 0.23  | 0.00     | -0.02 | 0.02  | 0.00  |  |           |  |  |  |  |
| 2              | 1  | -0.04    | 0.39  | 0.00  | 0.40  | -0.03 | 0.00     | 0.03  | -0.02 | 0.00  |  |           |  |  |  |  |
| 3              | 6  | 0.17     | -0.35 | 0.00  | 0.12  | -0.04 | 0.00     | 0.06  | 0.08  | 0.00  |  |           |  |  |  |  |
| 4              | 1  | 0.34     | -0.24 | 0.00  | -0.44 | -0.43 | 0.00     | 0.71  | 0.53  | 0.00  |  |           |  |  |  |  |

|                |    |           |       |      |           |       |      |           |       |      |
|----------------|----|-----------|-------|------|-----------|-------|------|-----------|-------|------|
| 5              | 6  | -0.32     | -0.15 | 0.00 | 0.10      | -0.06 | 0.00 | -0.04     | -0.11 | 0.00 |
| 6              | 1  | -0.29     | -0.25 | 0.00 | -0.08     | 0.41  | 0.00 | 0.05      | -0.36 | 0.00 |
| 7              | 7  | 0.02      | 0.10  | 0.00 | -0.22     | 0.11  | 0.00 | -0.07     | 0.06  | 0.00 |
| 8              | 7  | -0.07     | 0.25  | 0.00 | -0.06     | -0.23 | 0.00 | 0.01      | -0.08 | 0.00 |
| 9              | 1  | -0.17     | -0.30 | 0.00 | -0.18     | 0.19  | 0.00 | -0.01     | 0.20  | 0.00 |
| 10             |    |           |       | 11   |           |       |      | 12        |       |      |
| A              |    |           |       | A    |           |       |      | A         |       |      |
| Frequencies -- |    | 1071.6262 |       |      | 1159.9395 |       |      | 1205.3788 |       |      |
| Red. masses -- |    | 1.5564    |       |      | 1.8191    |       |      | 2.9900    |       |      |
| Frc consts --  |    | 1.0531    |       |      | 1.4421    |       |      | 2.5595    |       |      |
| IR Inten --    |    | 44.6039   |       |      | 21.6112   |       |      | 2.6461    |       |      |
| Raman Activ -- |    | 1.4128    |       |      | 7.5022    |       |      | 28.2985   |       |      |
| Depolar (P) -- |    | 0.6358    |       |      | 0.0325    |       |      | 0.0797    |       |      |
| Depolar (U) -- |    | 0.7774    |       |      | 0.0630    |       |      | 0.1476    |       |      |
| Atom           | AN | X         | Y     | Z    | X         | Y     | Z    | X         | Y     | Z    |
| 1              | 6  | 0.06      | -0.04 | 0.00 | -0.04     | -0.15 | 0.00 | 0.10      | 0.01  | 0.00 |
| 2              | 1  | 0.58      | -0.57 | 0.00 | 0.13      | -0.35 | 0.00 | 0.52      | -0.38 | 0.00 |
| 3              | 6  | -0.05     | 0.03  | 0.00 | 0.01      | -0.13 | 0.00 | -0.10     | 0.10  | 0.00 |
| 4              | 1  | -0.22     | -0.08 | 0.00 | 0.27      | 0.02  | 0.00 | -0.29     | 0.00  | 0.00 |
| 5              | 6  | 0.00      | -0.03 | 0.00 | -0.02     | 0.07  | 0.00 | -0.20     | -0.04 | 0.00 |
| 6              | 1  | 0.15      | -0.44 | 0.00 | -0.22     | 0.61  | 0.00 | -0.23     | -0.05 | 0.00 |
| 7              | 7  | -0.11     | 0.00  | 0.00 | -0.04     | 0.12  | 0.00 | 0.24      | 0.07  | 0.00 |
| 8              | 7  | 0.08      | 0.12  | 0.00 | 0.07      | 0.01  | 0.00 | -0.10     | -0.13 | 0.00 |
| 9              | 1  | -0.13     | -0.03 | 0.00 | 0.14      | 0.53  | 0.00 | 0.39      | 0.36  | 0.00 |
| 13             |    |           |       | 14   |           |       |      | 15        |       |      |
| A              |    |           |       | A    |           |       |      | A         |       |      |
| Frequencies -- |    | 1297.4867 |       |      | 1413.2508 |       |      | 1445.1333 |       |      |
| Red. masses -- |    | 1.6875    |       |      | 2.7127    |       |      | 4.3175    |       |      |
| Frc consts --  |    | 1.6738    |       |      | 3.1921    |       |      | 5.3125    |       |      |
| IR Inten --    |    | 4.0680    |       |      | 3.0272    |       |      | 18.1955   |       |      |
| Raman Activ -- |    | 11.5773   |       |      | 10.5409   |       |      | 28.0619   |       |      |
| Depolar (P) -- |    | 0.0440    |       |      | 0.1020    |       |      | 0.5317    |       |      |
| Depolar (U) -- |    | 0.0842    |       |      | 0.1851    |       |      | 0.6942    |       |      |
| Atom           | AN | X         | Y     | Z    | X         | Y     | Z    | X         | Y     | Z    |
| 1              | 6  | 0.00      | 0.10  | 0.00 | -0.11     | 0.07  | 0.00 | 0.21      | 0.03  | 0.00 |
| 2              | 1  | 0.19      | -0.08 | 0.00 | 0.43      | -0.47 | 0.00 | 0.05      | 0.24  | 0.00 |
| 3              | 6  | -0.09     | 0.03  | 0.00 | -0.06     | -0.11 | 0.00 | -0.29     | -0.20 | 0.00 |
| 4              | 1  | 0.18      | 0.24  | 0.00 | 0.39      | 0.17  | 0.00 | 0.40      | 0.28  | 0.00 |
| 5              | 6  | -0.07     | -0.06 | 0.00 | 0.21      | -0.07 | 0.00 | 0.02      | 0.31  | 0.00 |
| 6              | 1  | -0.34     | 0.62  | 0.00 | 0.15      | 0.14  | 0.00 | 0.33      | -0.46 | 0.00 |
| 7              | 7  | 0.01      | -0.07 | 0.00 | 0.11      | 0.08  | 0.00 | -0.02     | 0.05  | 0.00 |
| 8              | 7  | 0.15      | -0.02 | 0.00 | -0.20     | 0.06  | 0.00 | 0.03      | -0.16 | 0.00 |
| 9              | 1  | -0.19     | -0.52 | 0.00 | -0.14     | -0.45 | 0.00 | -0.16     | -0.25 | 0.00 |
| 16             |    |           |       | 17   |           |       |      | 18        |       |      |
| A              |    |           |       | A    |           |       |      | A         |       |      |
| Frequencies -- |    | 1513.4885 |       |      | 1592.1268 |       |      | 3261.7151 |       |      |
| Red. masses -- |    | 2.7071    |       |      | 3.0669    |       |      | 1.0927    |       |      |
| Frc consts --  |    | 3.6535    |       |      | 4.5804    |       |      | 6.8492    |       |      |
| IR Inten --    |    | 7.1197    |       |      | 7.0465    |       |      | 2.7825    |       |      |
| Raman Activ -- |    | 3.0395    |       |      | 2.4205    |       |      | 84.7030   |       |      |
| Depolar (P) -- |    | 0.7487    |       |      | 0.0813    |       |      | 0.5784    |       |      |
| Depolar (U) -- |    | 0.8563    |       |      | 0.1505    |       |      | 0.7329    |       |      |
| Atom           | AN | X         | Y     | Z    | X         | Y     | Z    | X         | Y     | Z    |
| 1              | 6  | -0.10     | 0.23  | 0.00 | 0.23      | -0.04 | 0.00 | 0.01      | 0.01  | 0.00 |
| 2              | 1  | 0.31      | -0.16 | 0.00 | -0.14     | 0.39  | 0.00 | -0.10     | -0.11 | 0.00 |
| 3              | 6  | 0.02      | -0.11 | 0.00 | -0.20     | 0.03  | 0.00 | 0.03      | -0.03 | 0.00 |
| 4              | 1  | 0.24      | 0.01  | 0.00 | 0.08      | 0.27  | 0.00 | -0.27     | 0.40  | 0.00 |
| 5              | 6  | -0.02     | 0.09  | 0.00 | 0.14      | -0.18 | 0.00 | -0.07     | -0.03 | 0.00 |
| 6              | 1  | 0.07      | -0.12 | 0.00 | -0.07     | 0.40  | 0.00 | 0.80      | 0.30  | 0.00 |
| 7              | 7  | 0.00      | -0.24 | 0.00 | -0.06     | -0.08 | 0.00 | 0.00      | 0.00  | 0.00 |

|                |   |           |       |      |           |       |      |           |       |      |
|----------------|---|-----------|-------|------|-----------|-------|------|-----------|-------|------|
| 8              | 7 | 0.01      | 0.04  | 0.00 | -0.09     | 0.12  | 0.00 | 0.00      | 0.00  | 0.00 |
| 9              | 1 | 0.45      | 0.67  | 0.00 | 0.24      | 0.58  | 0.00 | 0.01      | 0.00  | 0.00 |
|                |   | 19        |       |      | 20        |       |      | 21        |       |      |
|                |   | A         |       |      | A         |       |      | A         |       |      |
| Frequencies -- |   | 3276.3668 |       |      | 3294.5996 |       |      | 3708.9206 |       |      |
| Red. masses -- |   | 1.0964    |       |      | 1.1076    |       |      | 1.0821    |       |      |
| Frc consts --  |   | 6.9346    |       |      | 7.0837    |       |      | 8.7699    |       |      |
| IR Inten --    |   | 1.6933    |       |      | 0.1013    |       |      | 91.5755   |       |      |
| Raman Activ -- |   | 43.2397   |       |      | 132.4981  |       |      | 86.0580   |       |      |
| Depolar (P) -- |   | 0.3770    |       |      | 0.1323    |       |      | 0.2211    |       |      |
| Depolar (U) -- |   | 0.5476    |       |      | 0.2336    |       |      | 0.3621    |       |      |
| Atom AN        |   | X         | Y     | Z    | X         | Y     | Z    | X         | Y     | Z    |
| 1              | 6 | 0.03      | 0.04  | 0.00 | -0.06     | -0.05 | 0.00 | 0.00      | 0.00  | 0.00 |
| 2              | 1 | -0.39     | -0.39 | 0.00 | 0.58      | 0.57  | 0.00 | -0.01     | -0.01 | 0.00 |
| 3              | 6 | 0.03      | -0.05 | 0.00 | 0.03      | -0.04 | 0.00 | 0.00      | 0.00  | 0.00 |
| 4              | 1 | -0.38     | 0.56  | 0.00 | -0.31     | 0.45  | 0.00 | 0.00      | 0.00  | 0.00 |
| 5              | 6 | 0.04      | 0.02  | 0.00 | 0.01      | 0.01  | 0.00 | 0.00      | 0.00  | 0.00 |
| 6              | 1 | -0.44     | -0.17 | 0.00 | -0.15     | -0.06 | 0.00 | 0.00      | 0.00  | 0.00 |
| 7              | 7 | 0.00      | 0.00  | 0.00 | 0.00      | 0.00  | 0.00 | 0.07      | -0.03 | 0.00 |
| 8              | 7 | 0.00      | 0.00  | 0.00 | 0.00      | 0.00  | 0.00 | 0.00      | 0.00  | 0.00 |
| 9              | 1 | 0.01      | 0.00  | 0.00 | -0.02     | 0.00  | 0.00 | -0.90     | 0.42  | 0.00 |

## 2. PYRH+

Harmonic frequencies (cm<sup>-1</sup>), IR intensities (KM/Mole), Raman scattering activities (A<sup>4</sup>/AMU), depolarization ratios for plane and unpolarized incident light, reduced masses (AMU), force constants (mDyne/A), and normal coordinates:

|                |   |          |      |       |          |      |       |          |      |       |
|----------------|---|----------|------|-------|----------|------|-------|----------|------|-------|
|                |   | 1        |      |       | 2        |      |       | 3        |      |       |
|                |   | A        |      |       | A        |      |       | A        |      |       |
| Frequencies -- |   | 453.2490 |      |       | 573.0164 |      |       | 621.2772 |      |       |
| Red. masses -- |   | 1.5759   |      |       | 1.3541   |      |       | 2.0727   |      |       |
| Frc consts --  |   | 0.1907   |      |       | 0.2620   |      |       | 0.4714   |      |       |
| IR Inten --    |   | 0.0024   |      |       | 231.0918 |      |       | 8.2680   |      |       |
| Raman Activ -- |   | 0.2505   |      |       | 0.0021   |      |       | 0.0065   |      |       |
| Depolar (P) -- |   | 0.7493   |      |       | 0.5953   |      |       | 0.7424   |      |       |
| Depolar (U) -- |   | 0.8567   |      |       | 0.7463   |      |       | 0.8522   |      |       |
| Atom AN        |   | X        | Y    | Z     | X        | Y    | Z     | X        | Y    | Z     |
| 1              | 6 | 0.00     | 0.00 | -0.01 | 0.00     | 0.00 | 0.06  | 0.00     | 0.00 | 0.15  |
| 2              | 1 | 0.00     | 0.00 | -0.19 | 0.00     | 0.00 | 0.17  | 0.00     | 0.00 | 0.47  |
| 3              | 6 | 0.00     | 0.00 | 0.00  | 0.00     | 0.00 | -0.04 | 0.00     | 0.00 | -0.23 |
| 4              | 1 | 0.00     | 0.00 | 0.00  | 0.00     | 0.00 | -0.11 | 0.00     | 0.00 | -0.27 |
| 5              | 6 | 0.00     | 0.00 | 0.01  | 0.00     | 0.00 | 0.06  | 0.00     | 0.00 | 0.15  |
| 6              | 1 | 0.00     | 0.00 | 0.19  | 0.00     | 0.00 | 0.18  | 0.00     | 0.00 | 0.47  |
| 7              | 7 | 0.00     | 0.00 | 0.15  | 0.00     | 0.00 | -0.10 | 0.00     | 0.00 | -0.02 |
| 8              | 7 | 0.00     | 0.00 | -0.15 | 0.00     | 0.00 | -0.10 | 0.00     | 0.00 | -0.02 |
| 9              | 1 | 0.00     | 0.00 | -0.67 | 0.00     | 0.00 | 0.67  | 0.00     | 0.00 | -0.44 |
| 10             | 1 | 0.00     | 0.00 | 0.66  | 0.00     | 0.00 | 0.67  | 0.00     | 0.00 | -0.43 |
|                |   | 4        |      |       | 5        |      |       | 6        |      |       |
|                |   | A        |      |       | A        |      |       | A        |      |       |
| Frequencies -- |   | 635.6544 |      |       | 800.3666 |      |       | 916.0982 |      |       |
| Red. masses -- |   | 2.2808   |      |       | 1.1782   |      |       | 1.2833   |      |       |
| Frc consts --  |   | 0.5430   |      |       | 0.4447   |      |       | 0.6345   |      |       |
| IR Inten --    |   | 0.0010   |      |       | 101.9502 |      |       | 0.0006   |      |       |
| Raman Activ -- |   | 0.4315   |      |       | 0.0130   |      |       | 0.0818   |      |       |
| Depolar (P) -- |   | 0.7500   |      |       | 0.7439   |      |       | 0.7495   |      |       |
| Depolar (U) -- |   | 0.8571   |      |       | 0.8531   |      |       | 0.8568   |      |       |
| Atom AN        |   | X        | Y    | Z     | X        | Y    | Z     | X        | Y    | Z     |



|                |   |           |       |       |           |       |       |           |       |       |
|----------------|---|-----------|-------|-------|-----------|-------|-------|-----------|-------|-------|
| 1              | 6 | 0.00      | 0.00  | 0.15  | 0.00      | 0.00  | -0.07 | 0.00      | 0.00  | -0.11 |
| 2              | 1 | 0.00      | 0.00  | 0.21  | 0.00      | 0.00  | 0.42  | 0.00      | 0.00  | 0.69  |
| 3              | 6 | 0.00      | 0.00  | 0.00  | 0.00      | 0.00  | -0.06 | 0.00      | 0.00  | 0.00  |
| 4              | 1 | 0.00      | 0.00  | 0.00  | 0.00      | 0.00  | 0.79  | 0.00      | 0.00  | 0.00  |
| 5              | 6 | 0.00      | 0.00  | -0.15 | 0.00      | 0.00  | -0.07 | 0.00      | 0.00  | 0.11  |
| 6              | 1 | 0.00      | 0.00  | -0.22 | 0.00      | 0.00  | 0.42  | 0.00      | 0.00  | -0.69 |
| 7              | 7 | 0.00      | 0.00  | -0.18 | 0.00      | 0.00  | 0.02  | 0.00      | 0.00  | 0.01  |
| 8              | 7 | 0.00      | 0.00  | 0.18  | 0.00      | 0.00  | 0.02  | 0.00      | 0.00  | -0.01 |
| 9              | 1 | 0.00      | 0.00  | -0.63 | 0.00      | 0.00  | 0.07  | 0.00      | 0.00  | -0.13 |
| 10             | 1 | 0.00      | 0.00  | 0.64  | 0.00      | 0.00  | 0.07  | 0.00      | 0.00  | 0.13  |
|                |   | 7         |       |       | 8         |       |       | 9         |       |       |
|                |   | A         |       |       | A         |       |       | A         |       |       |
| Frequencies -- |   | 917.0146  |       |       | 948.5643  |       |       | 949.3146  |       |       |
| Red. masses -- |   | 5.7193    |       |       | 3.7439    |       |       | 1.3863    |       |       |
| Frc consts --  |   | 2.8336    |       |       | 1.9848    |       |       | 0.7361    |       |       |
| IR Inten --    |   | 2.8855    |       |       | 0.9460    |       |       | 0.0567    |       |       |
| Raman Activ -- |   | 3.9288    |       |       | 0.6556    |       |       | 0.0882    |       |       |
| Depolar (P) -- |   | 0.7148    |       |       | 0.7500    |       |       | 0.7493    |       |       |
| Depolar (U) -- |   | 0.8337    |       |       | 0.8571    |       |       | 0.8567    |       |       |
| Atom AN        |   | X         | Y     | Z     | X         | Y     | Z     | X         | Y     | Z     |
| 1              | 6 | -0.01     | -0.33 | 0.00  | 0.12      | 0.14  | 0.00  | 0.00      | 0.00  | -0.09 |
| 2              | 1 | -0.15     | -0.31 | 0.01  | -0.34     | 0.25  | 0.00  | 0.00      | 0.00  | 0.51  |
| 3              | 6 | 0.39      | 0.00  | 0.00  | 0.00      | 0.11  | 0.00  | 0.00      | 0.00  | 0.13  |
| 4              | 1 | 0.41      | 0.00  | 0.00  | 0.00      | -0.47 | 0.00  | 0.00      | 0.00  | -0.66 |
| 5              | 6 | -0.01     | 0.33  | 0.00  | -0.12     | 0.14  | 0.00  | 0.00      | 0.00  | -0.09 |
| 6              | 1 | -0.15     | 0.31  | -0.01 | 0.34      | 0.25  | -0.01 | 0.00      | 0.00  | 0.52  |
| 7              | 7 | -0.16     | -0.02 | 0.00  | 0.20      | -0.17 | 0.00  | 0.00      | 0.00  | 0.01  |
| 8              | 7 | -0.17     | 0.02  | 0.00  | -0.20     | -0.17 | 0.00  | 0.00      | 0.00  | 0.01  |
| 9              | 1 | 0.02      | 0.30  | 0.00  | 0.32      | -0.01 | 0.00  | 0.00      | 0.00  | -0.02 |
| 10             | 1 | 0.02      | -0.30 | 0.00  | -0.32     | -0.01 | 0.00  | 0.00      | 0.00  | -0.02 |
|                |   | 10        |       |       | 11        |       |       | 12        |       |       |
|                |   | A         |       |       | A         |       |       | A         |       |       |
| Frequencies -- |   | 1081.9582 |       |       | 1085.5749 |       |       | 1138.1878 |       |       |
| Red. masses -- |   | 1.2973    |       |       | 1.4253    |       |       | 1.5495    |       |       |
| Frc consts --  |   | 0.8948    |       |       | 0.9896    |       |       | 1.1826    |       |       |
| IR Inten --    |   | 16.3727   |       |       | 47.1092   |       |       | 47.2144   |       |       |
| Raman Activ -- |   | 2.0657    |       |       | 0.3760    |       |       | 0.1733    |       |       |
| Depolar (P) -- |   | 0.7500    |       |       | 0.7486    |       |       | 0.7498    |       |       |
| Depolar (U) -- |   | 0.8571    |       |       | 0.8562    |       |       | 0.8570    |       |       |
| Atom AN        |   | X         | Y     | Z     | X         | Y     | Z     | X         | Y     | Z     |
| 1              | 6 | 0.00      | -0.06 | 0.00  | 0.04      | -0.04 | 0.00  | -0.12     | -0.04 | 0.00  |
| 2              | 1 | 0.09      | -0.08 | 0.00  | 0.65      | -0.17 | 0.00  | -0.56     | 0.04  | 0.00  |
| 3              | 6 | 0.00      | 0.07  | 0.00  | -0.09     | 0.00  | 0.00  | 0.00      | -0.08 | 0.00  |
| 4              | 1 | 0.00      | 0.90  | 0.00  | -0.10     | 0.01  | 0.00  | 0.00      | -0.14 | 0.00  |
| 5              | 6 | 0.00      | -0.06 | 0.00  | 0.04      | 0.04  | 0.00  | 0.12      | -0.04 | 0.00  |
| 6              | 1 | -0.11     | -0.09 | 0.00  | 0.65      | 0.17  | 0.00  | 0.55      | 0.04  | 0.00  |
| 7              | 7 | 0.08      | -0.02 | 0.00  | -0.04     | 0.09  | 0.00  | 0.04      | 0.05  | 0.00  |
| 8              | 7 | -0.07     | -0.02 | 0.00  | -0.04     | -0.09 | 0.00  | -0.04     | 0.05  | 0.00  |
| 9              | 1 | 0.19      | 0.16  | 0.00  | 0.00      | 0.17  | 0.00  | 0.21      | 0.33  | 0.00  |
| 10             | 1 | -0.19     | 0.16  | 0.00  | -0.01     | -0.17 | 0.00  | -0.22     | 0.33  | 0.00  |
|                |   | 13        |       |       | 14        |       |       | 15        |       |       |
|                |   | A         |       |       | A         |       |       | A         |       |       |
| Frequencies -- |   | 1212.8127 |       |       | 1268.5138 |       |       | 1351.7687 |       |       |
| Red. masses -- |   | 5.0425    |       |       | 1.3069    |       |       | 1.3790    |       |       |
| Frc consts --  |   | 4.3700    |       |       | 1.2390    |       |       | 1.4846    |       |       |
| IR Inten --    |   | 6.4626    |       |       | 0.2188    |       |       | 8.8563    |       |       |
| Raman Activ -- |   | 44.7853   |       |       | 9.6005    |       |       | 0.4346    |       |       |
| Depolar (P) -- |   | 0.0562    |       |       | 0.3121    |       |       | 0.7500    |       |       |
| Depolar (U) -- |   | 0.1064    |       |       | 0.4757    |       |       | 0.8571    |       |       |
| Atom AN        |   | X         | Y     | Z     | X         | Y     | Z     | X         | Y     | Z     |

|    |   |       |       |      |       |       |      |       |       |      |
|----|---|-------|-------|------|-------|-------|------|-------|-------|------|
| 1  | 6 | 0.06  | 0.25  | 0.00 | -0.03 | -0.04 | 0.00 | -0.10 | 0.00  | 0.00 |
| 2  | 1 | -0.21 | 0.35  | 0.00 | -0.27 | 0.01  | 0.00 | 0.47  | -0.13 | 0.00 |
| 3  | 6 | 0.26  | 0.00  | 0.00 | -0.08 | 0.00  | 0.00 | 0.00  | 0.10  | 0.00 |
| 4  | 1 | 0.31  | 0.00  | 0.00 | -0.09 | 0.00  | 0.00 | 0.00  | -0.46 | 0.00 |
| 5  | 6 | 0.06  | -0.25 | 0.00 | -0.03 | 0.04  | 0.00 | 0.10  | 0.00  | 0.00 |
| 6  | 1 | -0.21 | -0.36 | 0.00 | -0.28 | -0.01 | 0.00 | -0.47 | -0.13 | 0.00 |
| 7  | 7 | -0.15 | 0.22  | 0.00 | 0.06  | 0.06  | 0.00 | 0.01  | -0.04 | 0.00 |
| 8  | 7 | -0.15 | -0.22 | 0.00 | 0.06  | -0.06 | 0.00 | -0.01 | -0.04 | 0.00 |
| 9  | 1 | -0.13 | 0.31  | 0.00 | 0.35  | 0.54  | 0.00 | 0.22  | 0.31  | 0.00 |
| 10 | 1 | -0.13 | -0.31 | 0.00 | 0.35  | -0.53 | 0.00 | -0.22 | 0.31  | 0.00 |

|                | 16        | 17        | 18        |
|----------------|-----------|-----------|-----------|
|                | A         | A         | A         |
| Frequencies -- | 1460.0448 | 1530.9064 | 1582.6399 |
| Red. masses -- | 4.1161    | 2.6415    | 3.8994    |
| Frc consts --  | 5.1697    | 3.6475    | 5.7546    |
| IR Inten --    | 71.6132   | 13.0320   | 0.8406    |
| Raman Activ -- | 20.0942   | 3.9957    | 0.6933    |
| Depolar (P) -- | 0.7500    | 0.1230    | 0.1188    |
| Depolar (U) -- | 0.8571    | 0.2190    | 0.2124    |

| Atom | AN | X     | Y     | Z    | X     | Y     | Z    | X     | Y     | Z    |
|------|----|-------|-------|------|-------|-------|------|-------|-------|------|
| 1    | 6  | 0.17  | -0.19 | 0.00 | -0.05 | -0.10 | 0.00 | 0.30  | -0.08 | 0.00 |
| 2    | 1  | -0.40 | -0.11 | 0.00 | -0.24 | -0.08 | 0.00 | -0.54 | 0.09  | 0.00 |
| 3    | 6  | 0.00  | 0.35  | 0.00 | -0.01 | 0.00  | 0.00 | -0.21 | 0.00  | 0.00 |
| 4    | 1  | 0.00  | -0.44 | 0.00 | -0.02 | 0.00  | 0.00 | -0.26 | 0.00  | 0.00 |
| 5    | 6  | -0.17 | -0.19 | 0.00 | -0.05 | 0.10  | 0.00 | 0.30  | 0.08  | 0.00 |
| 6    | 1  | 0.40  | -0.11 | 0.00 | -0.24 | 0.08  | 0.00 | -0.54 | -0.09 | 0.00 |
| 7    | 7  | -0.11 | 0.02  | 0.00 | 0.09  | 0.21  | 0.00 | -0.11 | 0.00  | 0.00 |
| 8    | 7  | 0.11  | 0.02  | 0.00 | 0.09  | -0.21 | 0.00 | -0.11 | 0.00  | 0.00 |
| 9    | 1  | 0.05  | 0.30  | 0.00 | -0.34 | -0.50 | 0.00 | -0.18 | -0.08 | 0.00 |
| 10   | 1  | -0.05 | 0.30  | 0.00 | -0.35 | 0.50  | 0.00 | -0.18 | 0.08  | 0.00 |

|                | 19        | 20        | 21        |
|----------------|-----------|-----------|-----------|
|                | A         | A         | A         |
| Frequencies -- | 1606.4810 | 3284.8434 | 3288.3133 |
| Red. masses -- | 2.2404    | 1.0977    | 1.1025    |
| Frc consts --  | 3.4066    | 6.9783    | 7.0238    |
| IR Inten --    | 33.4609   | 0.1471    | 38.7585   |
| Raman Activ -- | 0.8277    | 90.0564   | 8.2995    |
| Depolar (P) -- | 0.7500    | 0.4286    | 0.7459    |
| Depolar (U) -- | 0.8571    | 0.6000    | 0.8544    |

| Atom | AN | X     | Y     | Z    | X     | Y     | Z    | X     | Y     | Z    |
|------|----|-------|-------|------|-------|-------|------|-------|-------|------|
| 1    | 6  | -0.07 | -0.09 | 0.00 | 0.01  | 0.06  | 0.00 | -0.01 | -0.07 | 0.00 |
| 2    | 1  | 0.02  | -0.14 | 0.00 | -0.13 | -0.61 | 0.00 | 0.15  | 0.71  | 0.00 |
| 3    | 6  | 0.00  | 0.13  | 0.00 | -0.03 | 0.00  | 0.00 | 0.00  | 0.01  | 0.00 |
| 4    | 1  | 0.00  | -0.27 | 0.00 | 0.39  | 0.00  | 0.00 | -0.02 | -0.01 | 0.00 |
| 5    | 6  | 0.08  | -0.09 | 0.00 | 0.01  | -0.06 | 0.00 | 0.01  | -0.06 | 0.00 |
| 6    | 1  | -0.02 | -0.14 | 0.00 | -0.14 | 0.66  | 0.00 | -0.14 | 0.67  | 0.00 |
| 7    | 7  | 0.15  | 0.08  | 0.00 | 0.00  | 0.00  | 0.00 | 0.00  | 0.00  | 0.00 |
| 8    | 7  | -0.15 | 0.08  | 0.00 | 0.00  | 0.00  | 0.00 | 0.00  | 0.00  | 0.00 |
| 9    | 1  | -0.24 | -0.58 | 0.00 | -0.01 | 0.01  | 0.00 | 0.00  | -0.01 | 0.00 |
| 10   | 1  | 0.24  | -0.58 | 0.00 | -0.01 | -0.01 | 0.00 | 0.00  | -0.01 | 0.00 |

|                | 22        | 23        | 24        |
|----------------|-----------|-----------|-----------|
|                | A         | A         | A         |
| Frequencies -- | 3309.3330 | 3648.0377 | 3659.3064 |
| Red. masses -- | 1.1081    | 1.0853    | 1.0861    |
| Frc consts --  | 7.1498    | 8.5094    | 8.5689    |
| IR Inten --    | 26.9738   | 151.8665  | 347.0569  |
| Raman Activ -- | 97.4513   | 27.7952   | 98.7144   |
| Depolar (P) -- | 0.1005    | 0.7494    | 0.1151    |
| Depolar (U) -- | 0.1826    | 0.8568    | 0.2065    |

| Atom | AN | X | Y | Z | X | Y | Z | X | Y | Z |
|------|----|---|---|---|---|---|---|---|---|---|
|------|----|---|---|---|---|---|---|---|---|---|

|    |   |       |       |      |       |       |      |       |       |      |
|----|---|-------|-------|------|-------|-------|------|-------|-------|------|
| 1  | 6 | 0.00  | -0.03 | 0.00 | 0.00  | 0.00  | 0.00 | 0.00  | 0.00  | 0.00 |
| 2  | 1 | 0.05  | 0.27  | 0.00 | 0.00  | 0.00  | 0.00 | 0.00  | 0.01  | 0.00 |
| 3  | 6 | -0.09 | 0.00  | 0.00 | 0.00  | 0.00  | 0.00 | 0.00  | 0.00  | 0.00 |
| 4  | 1 | 0.92  | 0.00  | 0.00 | 0.00  | 0.00  | 0.00 | 0.00  | 0.00  | 0.00 |
| 5  | 6 | 0.00  | 0.03  | 0.00 | 0.00  | 0.00  | 0.00 | 0.00  | 0.00  | 0.00 |
| 6  | 1 | 0.05  | -0.27 | 0.00 | 0.00  | -0.01 | 0.00 | 0.00  | -0.01 | 0.00 |
| 7  | 7 | 0.00  | 0.00  | 0.00 | -0.05 | 0.03  | 0.00 | 0.05  | -0.03 | 0.00 |
| 8  | 7 | 0.00  | 0.00  | 0.00 | 0.05  | 0.03  | 0.00 | 0.05  | 0.03  | 0.00 |
| 9  | 1 | 0.01  | -0.01 | 0.00 | 0.60  | -0.36 | 0.00 | -0.61 | 0.37  | 0.00 |
| 10 | 1 | 0.01  | 0.01  | 0.00 | -0.61 | -0.37 | 0.00 | -0.59 | -0.37 | 0.00 |

## HEM

Harmonic frequencies (cm<sup>-1</sup>), IR intensities (KM/Mole), Raman scattering activities (A<sup>4</sup>/AMU), depolarization ratios for plane and unpolarized incident light, reduced masses (AMU), force constants (mDyne/A), and normal coordinates:

|                |    | 1        |       |       | 2        |       |       | 3        |       |       |
|----------------|----|----------|-------|-------|----------|-------|-------|----------|-------|-------|
|                |    | A        |       |       | A        |       |       | A        |       |       |
| Frequencies -- |    | 36.0310  |       |       | 50.8398  |       |       | 69.3695  |       |       |
| Red. masses -- |    | 9.7882   |       |       | 7.4072   |       |       | 9.2713   |       |       |
| Frc consts --  |    | 0.0075   |       |       | 0.0113   |       |       | 0.0263   |       |       |
| IR Inten --    |    | 3.6050   |       |       | 1.6587   |       |       | 4.1927   |       |       |
| Raman Activ -- |    | 1.0499   |       |       | 0.8085   |       |       | 0.4063   |       |       |
| Depolar (P) -- |    | 0.7457   |       |       | 0.7370   |       |       | 0.7481   |       |       |
| Depolar (U) -- |    | 0.8543   |       |       | 0.8486   |       |       | 0.8559   |       |       |
| Atom           | AN | X        | Y     | Z     | X        | Y     | Z     | X        | Y     | Z     |
| 1              | 6  | 0.00     | 0.00  | -0.01 | 0.00     | -0.01 | -0.19 | 0.00     | -0.01 | -0.16 |
| 2              | 6  | 0.00     | 0.00  | -0.04 | 0.00     | 0.00  | -0.12 | 0.00     | -0.02 | -0.10 |
| 3              | 6  | 0.00     | 0.00  | -0.02 | -0.01    | 0.01  | -0.05 | 0.01     | -0.01 | -0.03 |
| 4              | 6  | 0.00     | 0.00  | 0.00  | -0.01    | 0.00  | -0.06 | 0.01     | -0.01 | -0.03 |
| 5              | 6  | 0.00     | 0.00  | 0.01  | -0.01    | -0.01 | -0.08 | 0.01     | -0.01 | -0.01 |
| 6              | 6  | 0.00     | 0.00  | 0.01  | 0.00     | -0.01 | -0.15 | 0.00     | -0.01 | -0.08 |
| 7              | 1  | 0.00     | 0.00  | -0.01 | 0.01     | -0.01 | -0.25 | 0.00     | -0.02 | -0.23 |
| 8              | 1  | 0.00     | 0.00  | -0.06 | 0.00     | 0.01  | -0.12 | 0.00     | -0.02 | -0.11 |
| 9              | 1  | 0.01     | -0.01 | 0.04  | 0.01     | -0.02 | -0.15 | 0.00     | 0.00  | -0.09 |
| 10             | 6  | 0.01     | 0.01  | -0.01 | 0.01     | 0.00  | -0.03 | -0.04    | -0.02 | -0.16 |
| 11             | 8  | 0.24     | 0.00  | -0.12 | 0.00     | 0.03  | -0.01 | -0.01    | -0.17 | -0.27 |
| 12             | 8  | -0.25    | 0.00  | 0.09  | 0.08     | -0.02 | -0.04 | -0.17    | 0.14  | -0.21 |
| 13             | 1  | -0.25    | 0.00  | 0.08  | 0.11     | -0.02 | -0.03 | -0.22    | 0.12  | -0.34 |
| 14             | 6  | 0.00     | 0.01  | 0.03  | 0.00     | 0.01  | 0.05  | 0.02     | 0.00  | 0.11  |
| 15             | 8  | -0.01    | 0.12  | 0.34  | 0.04     | -0.05 | -0.12 | 0.06     | 0.05  | 0.26  |
| 16             | 8  | 0.03     | -0.12 | -0.29 | -0.05    | 0.09  | 0.37  | 0.00     | -0.05 | 0.09  |
| 17             | 1  | 0.02     | -0.09 | -0.21 | -0.03    | 0.08  | 0.42  | 0.01     | -0.03 | 0.21  |
| 18             | 6  | 0.01     | 0.01  | -0.01 | 0.00     | -0.01 | 0.03  | 0.03     | 0.01  | 0.14  |
| 19             | 8  | 0.10     | 0.23  | -0.22 | 0.14     | 0.13  | -0.07 | 0.08     | -0.15 | 0.33  |
| 20             | 8  | -0.10    | -0.21 | 0.22  | -0.17    | -0.16 | 0.29  | 0.00     | 0.22  | 0.08  |
| 21             | 1  | -0.19    | -0.39 | 0.32  | -0.30    | -0.26 | 0.30  | -0.03    | 0.35  | -0.05 |
|                |    | 4        |       |       | 5        |       |       | 6        |       |       |
|                |    | A        |       |       | A        |       |       | A        |       |       |
| Frequencies -- |    | 117.7184 |       |       | 136.8653 |       |       | 151.8997 |       |       |
| Red. masses -- |    | 10.4229  |       |       | 11.8515  |       |       | 6.2447   |       |       |
| Frc consts --  |    | 0.0851   |       |       | 0.1308   |       |       | 0.0849   |       |       |
| IR Inten --    |    | 2.6360   |       |       | 2.1048   |       |       | 2.3020   |       |       |
| Raman Activ -- |    | 1.5538   |       |       | 1.2329   |       |       | 3.3107   |       |       |
| Depolar (P) -- |    | 0.7188   |       |       | 0.7399   |       |       | 0.7436   |       |       |
| Depolar (U) -- |    | 0.8364   |       |       | 0.8505   |       |       | 0.8530   |       |       |
| Atom           | AN | X        | Y     | Z     | X        | Y     | Z     | X        | Y     | Z     |
| 1              | 6  | 0.00     | -0.04 | 0.06  | -0.04    | 0.08  | 0.00  | -0.01    | -0.03 | -0.21 |

|    |   |       |       |       |       |       |       |       |       |       |
|----|---|-------|-------|-------|-------|-------|-------|-------|-------|-------|
| 2  | 6 | 0.01  | -0.05 | 0.00  | -0.05 | 0.07  | -0.07 | -0.01 | -0.04 | -0.23 |
| 3  | 6 | -0.01 | -0.05 | -0.06 | -0.04 | 0.07  | -0.07 | 0.00  | -0.02 | 0.04  |
| 4  | 6 | 0.00  | -0.07 | -0.04 | -0.03 | 0.10  | -0.04 | 0.01  | 0.00  | 0.25  |
| 5  | 6 | 0.00  | -0.05 | 0.03  | -0.04 | 0.10  | 0.03  | 0.01  | 0.01  | 0.26  |
| 6  | 6 | 0.00  | -0.05 | 0.07  | -0.02 | 0.10  | 0.06  | -0.01 | 0.00  | 0.08  |
| 7  | 1 | 0.01  | -0.04 | 0.10  | -0.05 | 0.08  | 0.01  | -0.03 | -0.04 | -0.44 |
| 8  | 1 | 0.01  | -0.05 | 0.00  | -0.05 | 0.07  | -0.11 | -0.02 | -0.05 | -0.47 |
| 9  | 1 | 0.00  | -0.05 | 0.11  | -0.03 | 0.11  | 0.13  | -0.01 | 0.00  | 0.08  |
| 10 | 6 | 0.04  | -0.06 | -0.01 | 0.15  | 0.12  | -0.06 | 0.01  | -0.01 | 0.10  |
| 11 | 8 | 0.40  | 0.03  | -0.12 | 0.40  | 0.21  | -0.13 | 0.04  | -0.19 | -0.01 |
| 12 | 8 | -0.34 | -0.17 | 0.21  | 0.10  | 0.05  | 0.00  | -0.03 | 0.18  | 0.01  |
| 13 | 1 | -0.33 | -0.16 | 0.29  | 0.34  | 0.07  | -0.03 | -0.03 | 0.16  | -0.17 |
| 14 | 6 | -0.07 | 0.03  | -0.09 | 0.01  | 0.00  | -0.03 | -0.01 | -0.02 | -0.01 |
| 15 | 8 | -0.17 | -0.03 | -0.27 | 0.14  | -0.01 | -0.02 | -0.04 | -0.04 | -0.08 |
| 16 | 8 | -0.02 | 0.21  | 0.12  | -0.06 | -0.09 | 0.04  | 0.00  | 0.02  | 0.04  |
| 17 | 1 | -0.07 | 0.27  | 0.08  | -0.01 | -0.15 | 0.08  | -0.01 | 0.02  | -0.01 |
| 18 | 6 | 0.04  | 0.03  | 0.04  | -0.15 | -0.12 | 0.08  | 0.00  | 0.03  | 0.06  |
| 19 | 8 | 0.10  | 0.00  | 0.09  | -0.40 | -0.28 | 0.17  | -0.14 | 0.13  | -0.09 |
| 20 | 8 | 0.04  | 0.20  | -0.04 | -0.04 | -0.28 | 0.02  | 0.16  | -0.05 | -0.07 |
| 21 | 1 | 0.01  | 0.17  | -0.04 | 0.11  | -0.10 | -0.04 | 0.29  | -0.12 | 0.06  |

|                |    |          |       |       |          |       |       |          |       |       |
|----------------|----|----------|-------|-------|----------|-------|-------|----------|-------|-------|
|                |    | 7        |       |       | 8        |       |       | 9        |       |       |
|                |    | A        |       |       | A        |       |       | A        |       |       |
| Frequencies -- |    | 165.1556 |       |       | 171.8812 |       |       | 267.5933 |       |       |
| Red. masses -- |    | 5.9677   |       |       | 6.0388   |       |       | 5.8185   |       |       |
| Frc consts --  |    | 0.0959   |       |       | 0.1051   |       |       | 0.2455   |       |       |
| IR Inten --    |    | 3.6620   |       |       | 2.2733   |       |       | 5.1453   |       |       |
| Raman Activ -- |    | 1.3650   |       |       | 0.7248   |       |       | 0.6681   |       |       |
| Depolar (P) -- |    | 0.7376   |       |       | 0.6384   |       |       | 0.7493   |       |       |
| Depolar (U) -- |    | 0.8490   |       |       | 0.7793   |       |       | 0.8567   |       |       |
| Atom           | AN | X        | Y     | Z     | X        | Y     | Z     | X        | Y     | Z     |
| 1              | 6  | 0.02     | 0.03  | 0.07  | -0.01    | -0.04 | 0.06  | -0.18    | 0.00  | 0.00  |
| 2              | 6  | 0.01     | 0.02  | -0.17 | -0.01    | -0.05 | -0.20 | -0.08    | -0.15 | 0.02  |
| 3              | 6  | 0.03     | 0.02  | -0.20 | -0.03    | -0.05 | -0.20 | 0.09     | -0.15 | -0.04 |
| 4              | 6  | 0.03     | 0.03  | -0.14 | -0.03    | -0.07 | -0.11 | 0.16     | 0.01  | -0.11 |
| 5              | 6  | 0.04     | 0.03  | 0.04  | -0.03    | -0.05 | 0.08  | 0.09     | 0.16  | -0.08 |
| 6              | 6  | 0.03     | 0.04  | 0.20  | -0.02    | -0.04 | 0.24  | -0.08    | 0.16  | -0.04 |
| 7              | 1  | 0.03     | 0.04  | 0.16  | 0.00     | -0.03 | 0.14  | -0.34    | 0.00  | 0.04  |
| 8              | 1  | 0.01     | 0.01  | -0.25 | -0.01    | -0.05 | -0.31 | -0.13    | -0.27 | 0.08  |
| 9              | 1  | 0.02     | 0.06  | 0.40  | -0.01    | -0.03 | 0.45  | -0.16    | 0.29  | -0.02 |
| 10             | 6  | -0.10    | 0.03  | -0.03 | 0.05     | -0.06 | -0.07 | 0.09     | 0.02  | -0.05 |
| 11             | 8  | -0.18    | 0.09  | 0.04  | 0.02     | 0.02  | 0.00  | -0.09    | 0.01  | 0.03  |
| 12             | 8  | -0.23    | -0.05 | 0.06  | 0.22     | -0.17 | -0.08 | -0.05    | 0.02  | 0.00  |
| 13             | 1  | -0.44    | -0.05 | 0.22  | 0.37     | -0.15 | -0.04 | -0.36    | 0.01  | 0.12  |
| 14             | 6  | 0.09     | -0.05 | -0.06 | -0.07    | 0.06  | 0.00  | 0.05     | -0.09 | 0.01  |
| 15             | 8  | 0.24     | -0.05 | -0.03 | -0.12    | 0.15  | 0.21  | -0.18    | -0.06 | 0.05  |
| 16             | 8  | -0.02    | -0.14 | 0.11  | -0.05    | 0.12  | 0.05  | 0.19     | 0.13  | 0.01  |
| 17             | 1  | 0.06     | -0.20 | 0.25  | -0.09    | 0.23  | 0.26  | 0.07     | 0.31  | 0.06  |
| 18             | 6  | 0.03     | 0.02  | 0.02  | 0.00     | 0.01  | 0.02  | 0.06     | 0.08  | 0.00  |
| 19             | 8  | -0.02    | 0.04  | -0.02 | -0.01    | 0.05  | -0.03 | -0.08    | -0.01 | 0.05  |
| 20             | 8  | 0.08     | -0.02 | -0.02 | 0.04     | 0.05  | -0.05 | 0.10     | -0.14 | 0.06  |
| 21             | 1  | 0.12     | -0.05 | 0.04  | 0.06     | -0.04 | 0.03  | 0.21     | 0.05  | -0.03 |

|                |  |          |  |  |          |  |  |          |  |  |
|----------------|--|----------|--|--|----------|--|--|----------|--|--|
|                |  | 10       |  |  | 11       |  |  | 12       |  |  |
|                |  | A        |  |  | A        |  |  | A        |  |  |
| Frequencies -- |  | 291.5103 |  |  | 329.7312 |  |  | 367.3092 |  |  |
| Red. masses -- |  | 10.7013  |  |  | 5.8229   |  |  | 6.7701   |  |  |
| Frc consts --  |  | 0.5358   |  |  | 0.3730   |  |  | 0.5382   |  |  |
| IR Inten --    |  | 0.9453   |  |  | 8.4404   |  |  | 5.7670   |  |  |
| Raman Activ -- |  | 2.4055   |  |  | 0.8410   |  |  | 2.3919   |  |  |
| Depolar (P) -- |  | 0.5569   |  |  | 0.0892   |  |  | 0.1566   |  |  |
| Depolar (U) -- |  | 0.7154   |  |  | 0.1638   |  |  | 0.2708   |  |  |

| Atom | AN | X     | Y     | Z     | X     | Y     | Z     | X     | Y     | Z     |
|------|----|-------|-------|-------|-------|-------|-------|-------|-------|-------|
| 1    | 6  | 0.00  | -0.11 | 0.04  | -0.03 | -0.01 | 0.19  | 0.12  | -0.09 | -0.12 |
| 2    | 6  | -0.07 | -0.04 | -0.03 | -0.02 | -0.06 | -0.17 | 0.10  | -0.06 | -0.07 |
| 3    | 6  | -0.13 | -0.03 | -0.05 | 0.03  | -0.04 | -0.13 | 0.03  | -0.06 | 0.17  |
| 4    | 6  | -0.03 | 0.10  | -0.01 | 0.04  | -0.01 | 0.08  | -0.01 | 0.00  | -0.04 |
| 5    | 6  | 0.10  | -0.06 | -0.03 | -0.01 | 0.00  | -0.17 | -0.01 | -0.06 | 0.05  |
| 6    | 6  | 0.04  | -0.06 | 0.02  | -0.02 | 0.01  | 0.08  | 0.12  | -0.08 | 0.18  |
| 7    | 1  | 0.01  | -0.11 | 0.11  | -0.05 | 0.00  | 0.43  | 0.13  | -0.11 | -0.30 |
| 8    | 1  | -0.03 | 0.04  | -0.06 | -0.03 | -0.09 | -0.33 | 0.13  | -0.01 | -0.20 |
| 9    | 1  | 0.00  | 0.01  | 0.06  | -0.03 | 0.04  | 0.18  | 0.15  | -0.12 | 0.32  |
| 10   | 6  | -0.02 | 0.21  | 0.02  | 0.06  | 0.01  | 0.16  | -0.02 | 0.10  | -0.09 |
| 11   | 8  | 0.02  | 0.28  | 0.04  | 0.05  | -0.14 | 0.08  | -0.02 | 0.27  | 0.00  |
| 12   | 8  | 0.00  | 0.29  | -0.02 | 0.01  | 0.25  | 0.07  | -0.03 | 0.06  | -0.06 |
| 13   | 1  | 0.00  | 0.28  | -0.15 | -0.07 | 0.21  | -0.17 | -0.08 | 0.06  | -0.03 |
| 14   | 6  | -0.19 | -0.09 | -0.01 | 0.04  | -0.01 | -0.06 | 0.05  | -0.13 | 0.13  |
| 15   | 8  | -0.25 | -0.07 | 0.03  | 0.04  | 0.01  | 0.00  | -0.12 | -0.16 | 0.02  |
| 16   | 8  | -0.25 | -0.13 | 0.03  | 0.06  | 0.05  | 0.02  | 0.22  | 0.02  | -0.01 |
| 17   | 1  | -0.20 | -0.17 | 0.12  | 0.03  | 0.12  | 0.11  | 0.10  | 0.12  | -0.25 |
| 18   | 6  | 0.19  | -0.12 | -0.02 | -0.05 | -0.04 | -0.15 | -0.10 | -0.04 | -0.01 |
| 19   | 8  | 0.32  | -0.11 | 0.01  | 0.07  | -0.12 | -0.04 | -0.07 | 0.00  | -0.05 |
| 20   | 8  | 0.22  | -0.11 | -0.04 | -0.23 | 0.05  | -0.02 | -0.19 | 0.14  | -0.02 |
| 21   | 1  | 0.26  | -0.13 | 0.00  | -0.40 | 0.09  | -0.15 | -0.36 | -0.11 | 0.08  |

13

14

15

A

A

A

Frequencies -- 396.6048 421.5011 498.4035

Red. masses -- 6.5824 5.0677 1.1473

Frc consts -- 0.6100 0.5305 0.1679

IR Inten -- 4.9527 8.4168 84.9252

Raman Activ -- 2.7665 3.3556 0.6255

Depolar (P) -- 0.7473 0.2139 0.3633

Depolar (U) -- 0.8554 0.3524 0.5330

| Atom | AN | X     | Y     | Z     | X     | Y     | Z     | X     | Y     | Z     |
|------|----|-------|-------|-------|-------|-------|-------|-------|-------|-------|
| 1    | 6  | -0.23 | 0.00  | -0.06 | 0.04  | 0.14  | -0.05 | 0.02  | -0.01 | 0.02  |
| 2    | 6  | -0.23 | 0.05  | -0.06 | 0.06  | 0.08  | -0.12 | 0.01  | 0.00  | -0.01 |
| 3    | 6  | -0.03 | 0.08  | 0.17  | 0.01  | 0.07  | 0.22  | 0.00  | 0.00  | 0.00  |
| 4    | 6  | -0.09 | 0.01  | 0.07  | 0.05  | 0.05  | 0.00  | -0.01 | -0.01 | 0.02  |
| 5    | 6  | -0.05 | -0.07 | 0.01  | 0.05  | 0.13  | -0.13 | 0.00  | -0.02 | 0.02  |
| 6    | 6  | -0.23 | -0.04 | 0.13  | 0.06  | 0.17  | 0.17  | 0.01  | -0.03 | 0.00  |
| 7    | 1  | -0.15 | 0.00  | -0.18 | 0.00  | 0.13  | -0.14 | 0.03  | -0.01 | 0.01  |
| 8    | 1  | -0.27 | -0.04 | -0.22 | 0.05  | 0.07  | -0.37 | 0.02  | 0.01  | -0.04 |
| 9    | 1  | -0.27 | 0.04  | 0.23  | 0.06  | 0.19  | 0.36  | 0.00  | -0.02 | -0.07 |
| 10   | 6  | -0.12 | 0.01  | -0.02 | 0.05  | -0.04 | -0.03 | -0.02 | 0.00  | 0.00  |
| 11   | 8  | 0.01  | 0.07  | -0.04 | -0.03 | -0.12 | -0.04 | 0.00  | 0.02  | 0.00  |
| 12   | 8  | -0.01 | -0.07 | -0.02 | 0.01  | -0.13 | 0.03  | -0.01 | 0.00  | -0.01 |
| 13   | 1  | 0.30  | -0.04 | -0.06 | -0.08 | -0.12 | 0.21  | 0.09  | 0.00  | -0.05 |
| 14   | 6  | 0.10  | 0.07  | 0.08  | -0.07 | 0.02  | 0.12  | 0.00  | -0.01 | 0.00  |
| 15   | 8  | 0.17  | 0.03  | -0.03 | -0.13 | -0.04 | -0.04 | 0.00  | -0.01 | 0.00  |
| 16   | 8  | 0.18  | 0.12  | -0.03 | -0.11 | -0.09 | 0.00  | 0.01  | 0.00  | 0.00  |
| 17   | 1  | 0.11  | 0.14  | -0.33 | -0.03 | -0.30 | -0.32 | 0.00  | 0.02  | 0.01  |
| 18   | 6  | 0.06  | -0.09 | -0.05 | 0.04  | 0.04  | -0.11 | 0.00  | 0.02  | 0.00  |
| 19   | 8  | 0.22  | -0.10 | 0.00  | 0.07  | -0.07 | 0.02  | 0.00  | 0.03  | -0.02 |
| 20   | 8  | 0.05  | -0.08 | -0.05 | -0.04 | -0.05 | 0.01  | -0.02 | -0.05 | 0.04  |
| 21   | 1  | 0.07  | -0.05 | -0.06 | -0.04 | 0.16  | -0.17 | 0.17  | 0.79  | -0.56 |

16

17

18

A

A

A

Frequencies -- 521.2878 565.7509 579.1314

Red. masses -- 2.7003 2.0629 1.6520

Frc consts -- 0.4323 0.3890 0.3264

IR Inten -- 15.3017 50.8517 54.4733

Raman Activ -- 0.8765 3.4419 1.3656

|                |        |        |        |       |       |       |       |       |       |       |
|----------------|--------|--------|--------|-------|-------|-------|-------|-------|-------|-------|
| Depolar (P) -- | 0.2826 | 0.3475 | 0.6327 |       |       |       |       |       |       |       |
| Depolar (U) -- | 0.4406 | 0.5157 | 0.7750 |       |       |       |       |       |       |       |
| Atom AN        | X      | Y      | Z      | X     | Y     | Z     | X     | Y     | Z     |       |
| 1              | 6      | 0.04   | 0.08   | 0.10  | 0.00  | 0.06  | -0.06 | -0.01 | -0.03 | -0.09 |
| 2              | 6      | 0.01   | 0.10   | -0.09 | -0.01 | 0.06  | 0.07  | 0.03  | -0.06 | 0.08  |
| 3              | 6      | -0.03  | 0.05   | -0.06 | 0.00  | 0.03  | -0.04 | 0.03  | -0.04 | 0.02  |
| 4              | 6      | -0.07  | 0.04   | 0.02  | 0.00  | 0.05  | 0.06  | 0.04  | -0.02 | -0.06 |
| 5              | 6      | -0.03  | 0.02   | -0.06 | 0.01  | 0.04  | 0.12  | 0.03  | 0.02  | -0.04 |
| 6              | 6      | 0.02   | 0.01   | -0.09 | 0.01  | 0.06  | 0.04  | 0.01  | 0.03  | 0.08  |
| 7              | 1      | 0.09   | 0.09   | 0.29  | -0.01 | 0.06  | -0.21 | -0.07 | -0.04 | -0.18 |
| 8              | 1      | 0.03   | 0.14   | -0.12 | -0.01 | 0.05  | 0.11  | 0.01  | -0.09 | 0.16  |
| 9              | 1      | 0.05   | -0.04  | -0.09 | 0.00  | 0.06  | -0.06 | 0.00  | 0.06  | 0.19  |
| 10             | 6      | -0.13  | 0.00   | 0.04  | 0.00  | 0.02  | -0.01 | -0.03 | -0.01 | 0.03  |
| 11             | 8      | 0.00   | -0.03  | -0.04 | -0.01 | -0.02 | -0.03 | -0.01 | 0.00  | 0.03  |
| 12             | 8      | -0.03  | -0.04  | 0.03  | 0.01  | -0.04 | 0.02  | -0.07 | 0.03  | 0.03  |
| 13             | 1      | 0.78   | 0.00   | -0.21 | 0.00  | -0.03 | 0.13  | 0.80  | 0.05  | -0.40 |
| 14             | 6      | 0.02   | -0.10  | 0.03  | 0.02  | -0.07 | -0.09 | 0.00  | 0.03  | -0.02 |
| 15             | 8      | -0.09  | -0.11  | 0.03  | -0.04 | -0.03 | 0.02  | 0.02  | 0.03  | -0.01 |
| 16             | 8      | 0.12   | -0.02  | 0.02  | 0.04  | -0.03 | -0.03 | -0.04 | 0.00  | -0.01 |
| 17             | 1      | 0.03   | 0.10   | -0.03 | -0.04 | 0.32  | 0.84  | -0.01 | 0.00  | 0.15  |
| 18             | 6      | 0.00   | 0.03   | 0.03  | -0.01 | -0.06 | -0.03 | 0.01  | 0.03  | -0.03 |
| 19             | 8      | -0.01  | 0.03   | 0.03  | 0.07  | -0.05 | -0.02 | -0.01 | -0.01 | 0.00  |
| 20             | 8      | 0.06   | -0.01  | 0.00  | -0.06 | 0.00  | -0.03 | -0.01 | 0.00  | 0.01  |
| 21             | 1      | 0.10   | -0.15  | 0.14  | -0.11 | 0.02  | -0.08 | -0.04 | -0.01 | 0.01  |

19

20

21

A

A

A

|                |          |          |          |
|----------------|----------|----------|----------|
| Frequencies -- | 593.4339 | 620.1620 | 650.2438 |
| Red. masses -- | 4.0425   | 1.9521   | 4.5722   |
| Frc consts --  | 0.8388   | 0.4423   | 1.1390   |
| IR Inten --    | 9.6504   | 57.6246  | 52.9399  |
| Raman Activ -- | 1.4982   | 1.1518   | 1.6954   |
| Depolar (P) -- | 0.1365   | 0.7469   | 0.6599   |
| Depolar (U) -- | 0.2402   | 0.8551   | 0.7951   |

|         |   |       |       |       |       |       |       |       |       |       |
|---------|---|-------|-------|-------|-------|-------|-------|-------|-------|-------|
| Atom AN | X | Y     | Z     | X     | Y     | Z     | X     | Y     | Z     |       |
| 1       | 6 | -0.02 | -0.06 | 0.16  | 0.02  | -0.02 | 0.03  | 0.03  | -0.19 | -0.02 |
| 2       | 6 | 0.02  | -0.14 | -0.11 | 0.01  | 0.00  | -0.05 | -0.05 | -0.06 | 0.02  |
| 3       | 6 | 0.06  | -0.07 | 0.10  | -0.01 | 0.01  | 0.15  | -0.16 | -0.03 | 0.01  |
| 4       | 6 | 0.09  | 0.02  | 0.25  | -0.03 | -0.04 | 0.00  | -0.04 | 0.14  | -0.02 |
| 5       | 6 | 0.08  | 0.05  | 0.09  | -0.03 | -0.03 | -0.15 | 0.04  | 0.04  | -0.07 |
| 6       | 6 | 0.04  | 0.06  | -0.12 | -0.01 | -0.05 | 0.00  | 0.13  | 0.01  | 0.02  |
| 7       | 1 | -0.15 | -0.07 | 0.15  | 0.05  | -0.01 | 0.08  | -0.03 | -0.19 | 0.01  |
| 8       | 1 | -0.01 | -0.20 | -0.45 | 0.01  | 0.00  | -0.20 | 0.04  | 0.10  | 0.05  |
| 9       | 1 | -0.01 | 0.11  | -0.45 | 0.01  | -0.07 | 0.12  | 0.08  | 0.11  | 0.12  |
| 10      | 6 | -0.04 | 0.04  | -0.09 | -0.01 | -0.03 | 0.01  | 0.00  | 0.16  | 0.00  |
| 11      | 8 | -0.05 | 0.11  | -0.06 | 0.02  | 0.03  | 0.03  | -0.06 | -0.10 | -0.13 |
| 12      | 8 | -0.05 | -0.11 | -0.04 | 0.00  | 0.01  | -0.03 | 0.06  | -0.02 | 0.13  |
| 13      | 1 | 0.39  | -0.06 | 0.02  | -0.20 | -0.01 | -0.05 | 0.14  | 0.04  | 0.52  |
| 14      | 6 | -0.01 | 0.04  | -0.05 | -0.01 | 0.02  | 0.02  | -0.13 | -0.07 | 0.02  |
| 15      | 8 | 0.04  | 0.07  | -0.01 | 0.03  | 0.00  | -0.03 | 0.17  | -0.09 | 0.04  |
| 16      | 8 | -0.07 | 0.01  | 0.00  | -0.01 | -0.01 | -0.08 | -0.03 | 0.14  | -0.06 |
| 17      | 1 | -0.01 | -0.05 | 0.12  | -0.08 | 0.33  | 0.82  | -0.29 | 0.49  | -0.13 |
| 18      | 6 | 0.04  | 0.00  | -0.05 | 0.01  | 0.07  | 0.00  | 0.01  | 0.00  | 0.01  |
| 19      | 8 | -0.02 | -0.04 | -0.02 | -0.04 | 0.04  | 0.03  | -0.03 | 0.01  | -0.01 |
| 20      | 8 | -0.04 | 0.03  | 0.02  | 0.06  | -0.01 | 0.03  | 0.01  | 0.02  | 0.02  |
| 21      | 1 | -0.20 | -0.14 | 0.08  | 0.12  | -0.03 | 0.08  | 0.01  | 0.06  | -0.02 |

22

23

24

A

A

A

|                |          |          |          |
|----------------|----------|----------|----------|
| Frequencies -- | 663.5443 | 725.8286 | 737.0709 |
| Red. masses -- | 6.0002   | 4.9317   | 6.0663   |
| Frc consts --  | 1.5565   | 1.5308   | 1.9417   |

|             |    |         |  |         |  |        |
|-------------|----|---------|--|---------|--|--------|
| IR Inten    | -- | 50.1226 |  | 61.1692 |  | 8.6291 |
| Raman Activ | -- | 1.4252  |  | 17.9031 |  | 3.2206 |
| Depolar (P) | -- | 0.1449  |  | 0.0452  |  | 0.0257 |
| Depolar (U) | -- | 0.2531  |  | 0.0865  |  | 0.0501 |

  

| Atom | AN | X     | Y     | Z     | X     | Y     | Z     | X     | Y     | Z     |
|------|----|-------|-------|-------|-------|-------|-------|-------|-------|-------|
| 1    | 6  | 0.06  | 0.12  | 0.00  | 0.00  | 0.09  | -0.02 | -0.03 | 0.07  | 0.11  |
| 2    | 6  | 0.17  | -0.12 | 0.01  | -0.03 | 0.10  | 0.03  | -0.05 | 0.05  | -0.11 |
| 3    | 6  | -0.07 | -0.12 | -0.01 | -0.06 | 0.02  | -0.06 | -0.01 | 0.04  | 0.09  |
| 4    | 6  | -0.08 | -0.09 | 0.05  | 0.00  | -0.03 | 0.06  | 0.06  | 0.01  | -0.25 |
| 5    | 6  | -0.18 | 0.11  | 0.05  | 0.09  | -0.01 | 0.03  | 0.04  | -0.01 | 0.17  |
| 6    | 6  | 0.05  | 0.16  | -0.01 | 0.00  | 0.02  | 0.03  | -0.02 | 0.02  | -0.11 |
| 7    | 1  | -0.18 | 0.12  | -0.04 | 0.07  | 0.09  | -0.13 | 0.02  | 0.08  | 0.16  |
| 8    | 1  | 0.18  | -0.11 | -0.02 | -0.01 | 0.14  | 0.02  | -0.07 | 0.02  | -0.18 |
| 9    | 1  | 0.14  | 0.01  | -0.09 | -0.02 | 0.04  | -0.09 | -0.04 | 0.05  | -0.26 |
| 10   | 6  | 0.02  | -0.10 | -0.01 | -0.03 | -0.14 | 0.04  | 0.28  | -0.03 | -0.09 |
| 11   | 8  | 0.03  | 0.06  | 0.09  | 0.06  | 0.04  | 0.11  | -0.05 | -0.04 | 0.09  |
| 12   | 8  | -0.05 | 0.00  | -0.09 | -0.04 | -0.03 | -0.13 | -0.09 | 0.03  | 0.04  |
| 13   | 1  | -0.17 | -0.04 | -0.30 | -0.23 | -0.08 | -0.40 | 0.35  | 0.02  | -0.33 |
| 14   | 6  | -0.12 | -0.07 | 0.00  | -0.11 | -0.11 | -0.02 | -0.06 | 0.03  | 0.22  |
| 15   | 8  | 0.14  | -0.08 | 0.04  | 0.08  | -0.11 | 0.06  | 0.05  | -0.07 | -0.04 |
| 16   | 8  | -0.04 | 0.12  | -0.03 | -0.05 | 0.10  | -0.02 | -0.04 | 0.03  | -0.09 |
| 17   | 1  | -0.24 | 0.34  | -0.27 | -0.28 | 0.35  | -0.27 | -0.16 | 0.29  | 0.23  |
| 18   | 6  | -0.17 | 0.06  | 0.00  | 0.22  | 0.04  | -0.14 | -0.03 | -0.23 | 0.17  |
| 19   | 8  | 0.18  | 0.05  | 0.12  | -0.11 | -0.12 | -0.09 | 0.02  | 0.00  | -0.10 |
| 20   | 8  | -0.03 | -0.14 | -0.15 | 0.06  | 0.09  | 0.16  | -0.01 | 0.06  | -0.02 |
| 21   | 1  | 0.32  | -0.11 | 0.02  | -0.38 | -0.02 | 0.00  | -0.09 | 0.10  | -0.10 |

25

A

26

A

27

A

|             |    |          |  |          |  |          |
|-------------|----|----------|--|----------|--|----------|
| Frequencies | -- | 772.9378 |  | 796.5451 |  | 801.4289 |
| Red. masses | -- | 3.1258   |  | 4.3993   |  | 2.7506   |
| Frc consts  | -- | 1.1003   |  | 1.6446   |  | 1.0409   |
| IR Inten    | -- | 57.6221  |  | 35.2196  |  | 28.0627  |
| Raman Activ | -- | 1.4994   |  | 0.9628   |  | 0.9992   |
| Depolar (P) | -- | 0.1530   |  | 0.1079   |  | 0.7496   |
| Depolar (U) | -- | 0.2654   |  | 0.1947   |  | 0.8569   |

| Atom | AN | X     | Y     | Z     | X     | Y     | Z     | X     | Y     | Z     |
|------|----|-------|-------|-------|-------|-------|-------|-------|-------|-------|
| 1    | 6  | 0.03  | -0.03 | 0.07  | 0.02  | -0.04 | -0.06 | 0.00  | 0.04  | -0.11 |
| 2    | 6  | -0.05 | 0.09  | 0.04  | 0.01  | 0.01  | -0.06 | -0.01 | 0.04  | -0.02 |
| 3    | 6  | -0.01 | 0.05  | 0.04  | -0.01 | 0.00  | -0.14 | 0.00  | 0.01  | 0.01  |
| 4    | 6  | 0.00  | 0.00  | -0.03 | 0.01  | -0.02 | 0.07  | 0.03  | 0.00  | 0.20  |
| 5    | 6  | -0.02 | -0.04 | 0.00  | -0.01 | -0.02 | 0.15  | -0.01 | -0.03 | -0.12 |
| 6    | 6  | -0.04 | -0.12 | 0.04  | -0.05 | -0.09 | -0.02 | -0.04 | -0.03 | -0.02 |
| 7    | 1  | 0.21  | -0.06 | -0.51 | 0.12  | -0.01 | 0.49  | 0.09  | 0.08  | 0.55  |
| 8    | 1  | -0.04 | 0.12  | -0.46 | 0.04  | 0.06  | 0.58  | -0.01 | 0.05  | 0.39  |
| 9    | 1  | -0.02 | -0.20 | -0.39 | -0.03 | -0.11 | 0.12  | -0.01 | -0.01 | 0.58  |
| 10   | 6  | 0.22  | 0.02  | -0.09 | 0.09  | 0.03  | -0.06 | 0.18  | 0.01  | -0.10 |
| 11   | 8  | -0.06 | -0.01 | 0.02  | -0.04 | 0.01  | -0.02 | -0.05 | 0.03  | 0.02  |
| 12   | 8  | -0.05 | 0.01  | 0.05  | -0.02 | 0.00  | 0.03  | -0.06 | -0.03 | -0.01 |
| 13   | 1  | 0.21  | 0.02  | -0.05 | 0.11  | 0.02  | 0.08  | 0.13  | -0.01 | -0.03 |
| 14   | 6  | 0.01  | -0.07 | -0.15 | -0.02 | 0.10  | 0.28  | 0.00  | -0.05 | -0.10 |
| 15   | 8  | 0.00  | 0.00  | 0.05  | 0.00  | -0.03 | -0.08 | 0.00  | -0.01 | 0.04  |
| 16   | 8  | 0.00  | 0.02  | 0.04  | 0.01  | -0.03 | -0.07 | -0.02 | 0.02  | 0.02  |
| 17   | 1  | -0.01 | -0.02 | -0.14 | -0.01 | 0.07  | 0.18  | -0.03 | 0.01  | -0.10 |
| 18   | 6  | 0.00  | 0.16  | -0.10 | 0.06  | 0.23  | -0.21 | -0.03 | -0.07 | 0.08  |
| 19   | 8  | 0.01  | 0.01  | 0.08  | 0.00  | -0.04 | 0.08  | 0.00  | 0.03  | -0.02 |
| 20   | 8  | -0.02 | -0.05 | -0.02 | -0.04 | -0.06 | 0.00  | 0.01  | 0.01  | -0.01 |
| 21   | 1  | 0.06  | -0.12 | 0.09  | -0.06 | -0.12 | 0.03  | 0.06  | 0.07  | -0.02 |

28

A

29

A

30

A

|             |    |          |  |          |  |          |
|-------------|----|----------|--|----------|--|----------|
| Frequencies | -- | 808.4555 |  | 859.2699 |  | 903.4019 |
|-------------|----|----------|--|----------|--|----------|

|                |        |        |         |
|----------------|--------|--------|---------|
| Red. masses -- | 5.2266 | 3.7505 | 7.5643  |
| Frc consts --  | 2.0127 | 1.6316 | 3.6373  |
| IR Inten --    | 3.6265 | 3.3289 | 14.5839 |
| Raman Activ -- | 2.2530 | 0.9744 | 1.7075  |
| Depolar (P) -- | 0.1817 | 0.6181 | 0.7485  |
| Depolar (U) -- | 0.3076 | 0.7640 | 0.8562  |

  

| Atom | AN | X     | Y     | Z     | X     | Y     | Z     | X     | Y     | Z     |
|------|----|-------|-------|-------|-------|-------|-------|-------|-------|-------|
| 1    | 6  | -0.01 | 0.30  | 0.00  | 0.00  | -0.01 | -0.04 | -0.02 | 0.02  | 0.00  |
| 2    | 6  | 0.23  | -0.07 | 0.01  | 0.00  | 0.01  | -0.10 | -0.08 | 0.13  | 0.02  |
| 3    | 6  | 0.10  | -0.10 | 0.02  | 0.03  | 0.01  | 0.24  | 0.27  | 0.06  | -0.06 |
| 4    | 6  | 0.00  | -0.12 | -0.03 | 0.00  | 0.00  | -0.19 | 0.32  | 0.01  | 0.03  |
| 5    | 6  | -0.08 | -0.10 | -0.01 | 0.03  | 0.01  | 0.20  | 0.27  | -0.06 | -0.05 |
| 6    | 6  | -0.23 | -0.08 | 0.01  | -0.01 | -0.02 | -0.12 | -0.09 | -0.13 | 0.02  |
| 7    | 1  | -0.02 | 0.30  | -0.15 | 0.04  | 0.04  | 0.73  | 0.37  | 0.02  | -0.11 |
| 8    | 1  | 0.10  | -0.32 | -0.11 | 0.01  | 0.02  | 0.25  | -0.19 | -0.07 | -0.06 |
| 9    | 1  | -0.09 | -0.31 | -0.04 | 0.00  | 0.02  | 0.38  | -0.18 | 0.01  | 0.00  |
| 10   | 6  | -0.03 | 0.15  | -0.03 | -0.08 | 0.00  | 0.05  | -0.20 | 0.00  | 0.08  |
| 11   | 8  | -0.05 | 0.01  | -0.13 | 0.02  | -0.02 | -0.01 | 0.04  | 0.02  | -0.03 |
| 12   | 8  | 0.06  | 0.07  | 0.13  | 0.03  | 0.02  | 0.02  | 0.03  | -0.02 | -0.04 |
| 13   | 1  | 0.16  | 0.12  | 0.47  | -0.04 | 0.01  | -0.01 | -0.03 | -0.01 | 0.04  |
| 14   | 6  | -0.05 | -0.04 | -0.01 | 0.01  | -0.08 | -0.21 | -0.04 | -0.08 | 0.08  |
| 15   | 8  | 0.03  | -0.04 | 0.02  | 0.01  | 0.02  | 0.06  | 0.02  | -0.13 | 0.04  |
| 16   | 8  | -0.06 | 0.04  | -0.01 | -0.03 | 0.03  | 0.04  | -0.18 | 0.10  | -0.06 |
| 17   | 1  | -0.12 | 0.11  | -0.08 | -0.02 | -0.01 | -0.07 | -0.32 | 0.28  | -0.12 |
| 18   | 6  | 0.07  | -0.03 | -0.02 | 0.02  | 0.08  | -0.08 | -0.10 | 0.02  | 0.11  |
| 19   | 8  | -0.03 | -0.04 | -0.05 | 0.01  | -0.02 | 0.03  | 0.01  | 0.12  | 0.10  |
| 20   | 8  | 0.06  | 0.03  | 0.07  | -0.04 | -0.03 | -0.02 | -0.15 | -0.07 | -0.16 |
| 21   | 1  | -0.08 | 0.02  | 0.00  | -0.06 | -0.03 | -0.03 | 0.15  | -0.08 | 0.01  |

31

A

32

A

33

A

|                |          |           |           |
|----------------|----------|-----------|-----------|
| Frequencies -- | 967.2492 | 1017.9954 | 1095.2816 |
| Red. masses -- | 1.3934   | 1.3457    | 4.2176    |
| Frc consts --  | 0.7681   | 0.8216    | 2.9811    |
| IR Inten --    | 0.1769   | 1.6356    | 27.2431   |
| Raman Activ -- | 0.2015   | 0.1116    | 21.6552   |
| Depolar (P) -- | 0.1315   | 0.0910    | 0.0821    |
| Depolar (U) -- | 0.2324   | 0.1667    | 0.1517    |

| Atom | AN | X     | Y     | Z     | X     | Y     | Z     | X     | Y     | Z     |
|------|----|-------|-------|-------|-------|-------|-------|-------|-------|-------|
| 1    | 6  | 0.00  | 0.00  | 0.01  | 0.00  | -0.01 | -0.13 | -0.01 | 0.07  | 0.00  |
| 2    | 6  | 0.01  | 0.01  | 0.11  | 0.00  | 0.01  | 0.10  | -0.26 | 0.07  | 0.00  |
| 3    | 6  | -0.01 | 0.00  | -0.05 | 0.00  | 0.00  | -0.01 | 0.10  | -0.04 | 0.00  |
| 4    | 6  | -0.01 | 0.00  | 0.00  | 0.00  | 0.00  | -0.01 | 0.00  | -0.23 | 0.02  |
| 5    | 6  | 0.00  | 0.00  | 0.04  | 0.00  | 0.00  | 0.00  | -0.09 | -0.04 | 0.01  |
| 6    | 6  | 0.00  | -0.01 | -0.13 | 0.01  | 0.01  | 0.07  | 0.27  | 0.08  | -0.02 |
| 7    | 1  | 0.00  | -0.01 | -0.08 | 0.00  | 0.04  | 0.70  | -0.01 | 0.09  | -0.03 |
| 8    | 1  | -0.01 | -0.03 | -0.64 | -0.03 | -0.04 | -0.55 | -0.49 | -0.32 | 0.04  |
| 9    | 1  | 0.00  | 0.07  | 0.74  | 0.01  | -0.04 | -0.42 | 0.51  | -0.28 | 0.09  |
| 10   | 6  | 0.00  | 0.00  | 0.00  | 0.00  | 0.00  | 0.00  | -0.02 | -0.04 | -0.07 |
| 11   | 8  | 0.00  | 0.00  | 0.00  | 0.00  | 0.00  | 0.00  | -0.03 | 0.05  | -0.06 |
| 12   | 8  | 0.00  | 0.00  | 0.00  | 0.00  | 0.00  | 0.00  | 0.04  | 0.06  | 0.10  |
| 13   | 1  | 0.00  | 0.00  | 0.00  | 0.00  | 0.00  | 0.00  | 0.02  | 0.05  | 0.05  |
| 14   | 6  | 0.00  | 0.01  | 0.03  | 0.00  | 0.00  | 0.01  | 0.07  | -0.01 | 0.02  |
| 15   | 8  | 0.00  | 0.00  | -0.01 | 0.00  | 0.00  | 0.00  | 0.00  | -0.02 | 0.01  |
| 16   | 8  | 0.01  | -0.01 | 0.00  | 0.00  | 0.00  | 0.00  | -0.06 | 0.04  | -0.02 |
| 17   | 1  | 0.00  | 0.01  | 0.00  | 0.00  | 0.01  | 0.00  | 0.02  | -0.06 | 0.02  |
| 18   | 6  | 0.01  | 0.01  | -0.01 | 0.00  | 0.00  | 0.00  | -0.05 | 0.02  | -0.05 |
| 19   | 8  | 0.00  | -0.01 | 0.00  | 0.00  | 0.00  | 0.00  | 0.00  | -0.02 | -0.01 |
| 20   | 8  | -0.01 | 0.00  | 0.00  | 0.00  | 0.00  | 0.00  | 0.03  | 0.02  | 0.04  |
| 21   | 1  | -0.02 | 0.02  | -0.03 | 0.00  | -0.01 | 0.01  | 0.10  | 0.06  | 0.05  |

34

35

36



|                | A         |       |       | A         |       |       | A         |       |       |       |
|----------------|-----------|-------|-------|-----------|-------|-------|-----------|-------|-------|-------|
| Frequencies -- | 1141.3529 |       |       | 1162.0854 |       |       | 1184.1718 |       |       |       |
| Red. masses -- | 4.9331    |       |       | 2.4255    |       |       | 1.7790    |       |       |       |
| Frc consts --  | 3.7863    |       |       | 1.9299    |       |       | 1.4698    |       |       |       |
| IR Inten --    | 12.3168   |       |       | 50.3642   |       |       | 172.1896  |       |       |       |
| Raman Activ -- | 4.9784    |       |       | 2.5099    |       |       | 1.7496    |       |       |       |
| Depolar (P) -- | 0.2097    |       |       | 0.7052    |       |       | 0.7296    |       |       |       |
| Depolar (U) -- | 0.3467    |       |       | 0.8271    |       |       | 0.8437    |       |       |       |
| Atom           | AN        | X     | Y     | Z         | X     | Y     | Z         | X     | Y     | Z     |
| 1              | 6         | -0.03 | 0.22  | -0.01     | 0.02  | 0.07  | 0.00      | 0.07  | 0.00  | 0.00  |
| 2              | 6         | -0.09 | -0.05 | 0.00      | -0.05 | -0.08 | 0.00      | -0.06 | -0.02 | 0.00  |
| 3              | 6         | -0.19 | -0.11 | 0.02      | 0.00  | -0.01 | 0.00      | -0.04 | -0.05 | 0.01  |
| 4              | 6         | -0.03 | 0.02  | 0.00      | 0.02  | 0.17  | -0.02     | 0.06  | -0.05 | 0.00  |
| 5              | 6         | 0.19  | -0.13 | -0.03     | -0.03 | 0.02  | 0.02      | 0.00  | 0.02  | 0.01  |
| 6              | 6         | 0.12  | -0.04 | 0.01      | 0.02  | -0.07 | 0.00      | -0.05 | 0.04  | 0.00  |
| 7              | 1         | -0.17 | 0.24  | -0.02     | 0.18  | 0.08  | -0.01     | 0.79  | 0.02  | -0.01 |
| 8              | 1         | -0.23 | -0.29 | 0.03      | -0.28 | -0.51 | 0.03      | -0.12 | -0.12 | 0.02  |
| 9              | 1         | 0.29  | -0.29 | 0.00      | 0.27  | -0.48 | 0.04      | -0.19 | 0.28  | -0.02 |
| 10             | 6         | 0.01  | 0.02  | 0.01      | 0.02  | 0.09  | 0.09      | -0.02 | -0.02 | -0.01 |
| 11             | 8         | 0.00  | -0.01 | 0.01      | 0.03  | -0.05 | 0.06      | 0.00  | 0.01  | -0.02 |
| 12             | 8         | -0.01 | -0.01 | -0.02     | -0.05 | -0.06 | -0.13     | 0.01  | 0.01  | 0.02  |
| 13             | 1         | 0.01  | 0.00  | 0.04      | 0.08  | -0.01 | 0.19      | 0.00  | 0.01  | -0.02 |
| 14             | 6         | -0.13 | 0.05  | -0.02     | 0.02  | 0.00  | 0.01      | -0.11 | 0.03  | -0.01 |
| 15             | 8         | 0.02  | 0.09  | -0.03     | 0.00  | 0.00  | 0.00      | 0.01  | 0.06  | -0.02 |
| 16             | 8         | 0.12  | -0.09 | 0.04      | -0.01 | 0.01  | -0.01     | 0.08  | -0.08 | 0.04  |
| 17             | 1         | -0.04 | 0.12  | -0.05     | 0.02  | -0.03 | 0.02      | -0.19 | 0.27  | -0.12 |
| 18             | 6         | 0.19  | 0.05  | 0.10      | -0.09 | 0.00  | -0.06     | -0.06 | -0.01 | -0.02 |
| 19             | 8         | -0.04 | 0.09  | 0.08      | 0.01  | -0.03 | -0.03     | 0.01  | -0.02 | -0.02 |
| 20             | 8         | -0.10 | -0.07 | -0.12     | 0.02  | 0.03  | 0.05      | 0.01  | 0.02  | 0.03  |
| 21             | 1         | -0.42 | -0.12 | -0.27     | 0.34  | 0.09  | 0.18      | 0.17  | 0.03  | 0.11  |

|                | 37        |       |       | 38        |       |       | 39        |       |       |       |
|----------------|-----------|-------|-------|-----------|-------|-------|-----------|-------|-------|-------|
|                | A         |       |       | A         |       |       | A         |       |       |       |
| Frequencies -- | 1208.5482 |       |       | 1229.8966 |       |       | 1238.4330 |       |       |       |
| Red. masses -- | 1.5143    |       |       | 1.8399    |       |       | 1.6048    |       |       |       |
| Frc consts --  | 1.3032    |       |       | 1.6397    |       |       | 1.4501    |       |       |       |
| IR Inten --    | 123.0617  |       |       | 108.2180  |       |       | 214.7757  |       |       |       |
| Raman Activ -- | 4.2659    |       |       | 7.2294    |       |       | 20.9915   |       |       |       |
| Depolar (P) -- | 0.7361    |       |       | 0.2669    |       |       | 0.0467    |       |       |       |
| Depolar (U) -- | 0.8480    |       |       | 0.4213    |       |       | 0.0893    |       |       |       |
| Atom           | AN        | X     | Y     | Z         | X     | Y     | Z         | X     | Y     | Z     |
| 1              | 6         | 0.05  | 0.00  | 0.00      | 0.00  | -0.06 | 0.00      | -0.01 | 0.03  | 0.00  |
| 2              | 6         | -0.02 | -0.03 | 0.00      | -0.01 | 0.03  | 0.00      | -0.03 | 0.04  | 0.00  |
| 3              | 6         | -0.03 | -0.04 | 0.00      | 0.10  | 0.06  | 0.00      | -0.07 | -0.11 | 0.01  |
| 4              | 6         | -0.04 | 0.01  | 0.00      | 0.00  | -0.09 | -0.01     | 0.03  | -0.10 | -0.01 |
| 5              | 6         | -0.05 | 0.04  | -0.01     | -0.09 | 0.01  | 0.00      | 0.06  | -0.03 | 0.00  |
| 6              | 6         | -0.02 | 0.02  | 0.00      | 0.02  | 0.03  | 0.00      | 0.00  | 0.02  | 0.00  |
| 7              | 1         | 0.61  | 0.02  | 0.00      | -0.09 | -0.07 | 0.00      | 0.03  | 0.04  | 0.00  |
| 8              | 1         | -0.12 | -0.21 | 0.00      | -0.03 | -0.01 | 0.01      | 0.19  | 0.48  | -0.04 |
| 9              | 1         | -0.11 | 0.17  | -0.02     | 0.00  | 0.06  | 0.00      | -0.06 | 0.14  | -0.01 |
| 10             | 6         | 0.00  | 0.01  | 0.01      | 0.02  | 0.06  | 0.04      | 0.00  | 0.03  | 0.02  |
| 11             | 8         | 0.00  | -0.01 | 0.01      | 0.02  | -0.02 | 0.05      | 0.02  | -0.01 | 0.03  |
| 12             | 8         | -0.01 | -0.01 | -0.02     | -0.05 | 0.01  | -0.11     | -0.03 | 0.01  | -0.07 |
| 13             | 1         | 0.01  | 0.00  | 0.04      | 0.25  | 0.12  | 0.63      | 0.20  | 0.10  | 0.50  |
| 14             | 6         | 0.08  | -0.01 | 0.01      | -0.03 | 0.00  | -0.01     | -0.01 | 0.01  | 0.00  |
| 15             | 8         | 0.00  | -0.04 | 0.01      | -0.01 | 0.02  | -0.01     | 0.01  | -0.01 | 0.00  |
| 16             | 8         | -0.05 | 0.08  | -0.03     | 0.01  | -0.05 | 0.02      | 0.00  | 0.04  | -0.02 |
| 17             | 1         | 0.28  | -0.35 | 0.15      | -0.28 | 0.32  | -0.14     | 0.27  | -0.31 | 0.14  |
| 18             | 6         | 0.07  | 0.00  | 0.04      | 0.03  | 0.00  | 0.02      | -0.01 | 0.00  | -0.01 |
| 19             | 8         | -0.01 | 0.02  | 0.02      | 0.00  | 0.02  | 0.02      | 0.00  | -0.01 | -0.01 |
| 20             | 8         | 0.01  | -0.03 | -0.03     | 0.03  | -0.02 | -0.01     | -0.03 | 0.01  | 0.01  |

|                |   |           |       |       |           |       |       |           |       |       |
|----------------|---|-----------|-------|-------|-----------|-------|-------|-----------|-------|-------|
| 21             | 1 | -0.44     | -0.08 | -0.24 | -0.43     | -0.07 | -0.23 | 0.35      | 0.05  | 0.19  |
|                |   | 40        |       |       | 41        |       |       | 42        |       |       |
|                |   | A         |       |       | A         |       |       | A         |       |       |
| Frequencies -- |   | 1261.1684 |       |       | 1327.5501 |       |       | 1349.4504 |       |       |
| Red. masses -- |   | 1.7127    |       |       | 4.3469    |       |       | 3.5824    |       |       |
| Frc consts --  |   | 1.6050    |       |       | 4.5137    |       |       | 3.8436    |       |       |
| IR Inten --    |   | 56.6536   |       |       | 129.9620  |       |       | 372.3619  |       |       |
| Raman Activ -- |   | 3.1289    |       |       | 3.7375    |       |       | 7.5246    |       |       |
| Depolar (P) -- |   | 0.3708    |       |       | 0.4873    |       |       | 0.4210    |       |       |
| Depolar (U) -- |   | 0.5410    |       |       | 0.6553    |       |       | 0.5925    |       |       |
| Atom AN        |   | X         | Y     | Z     | X         | Y     | Z     | X         | Y     | Z     |
| 1              | 6 | 0.03      | 0.01  | 0.00  | 0.17      | 0.04  | 0.00  | 0.11      | -0.05 | 0.00  |
| 2              | 6 | 0.03      | -0.04 | 0.00  | -0.09     | -0.14 | 0.01  | -0.06     | -0.10 | 0.01  |
| 3              | 6 | -0.01     | 0.12  | -0.01 | -0.13     | 0.15  | 0.00  | -0.03     | 0.10  | 0.00  |
| 4              | 6 | -0.08     | -0.02 | 0.00  | 0.27      | 0.02  | -0.01 | 0.11      | -0.02 | 0.00  |
| 5              | 6 | 0.04      | -0.16 | 0.00  | -0.06     | -0.24 | 0.01  | -0.17     | 0.02  | 0.00  |
| 6              | 6 | 0.04      | 0.05  | 0.00  | -0.07     | 0.13  | -0.01 | -0.09     | 0.12  | 0.00  |
| 7              | 1 | -0.12     | 0.01  | 0.00  | -0.39     | 0.03  | 0.01  | 0.09      | -0.06 | 0.01  |
| 8              | 1 | -0.20     | -0.49 | 0.03  | 0.11      | 0.25  | -0.04 | 0.09      | 0.18  | -0.02 |
| 9              | 1 | -0.30     | 0.62  | -0.05 | 0.03      | -0.04 | 0.02  | 0.27      | -0.48 | 0.02  |
| 10             | 6 | 0.03      | 0.01  | -0.01 | -0.03     | 0.00  | 0.01  | -0.02     | 0.00  | 0.00  |
| 11             | 8 | 0.00      | -0.01 | 0.01  | 0.00      | 0.01  | -0.01 | 0.00      | 0.01  | 0.00  |
| 12             | 8 | -0.01     | 0.00  | -0.01 | 0.01      | -0.01 | 0.00  | 0.00      | 0.00  | 0.00  |
| 13             | 1 | 0.04      | 0.02  | 0.11  | -0.01     | -0.02 | -0.07 | 0.00      | 0.00  | -0.02 |
| 14             | 6 | 0.04      | -0.01 | 0.00  | -0.05     | 0.00  | -0.01 | 0.06      | -0.01 | 0.00  |
| 15             | 8 | -0.01     | -0.02 | 0.01  | 0.00      | -0.03 | 0.01  | -0.01     | 0.00  | 0.00  |
| 16             | 8 | -0.02     | 0.01  | 0.00  | 0.03      | 0.03  | -0.01 | -0.02     | -0.01 | 0.00  |
| 17             | 1 | -0.02     | 0.01  | -0.01 | 0.24      | -0.25 | 0.11  | -0.11     | 0.13  | -0.06 |
| 18             | 6 | 0.03      | 0.03  | -0.01 | -0.15     | 0.01  | -0.07 | 0.28      | 0.01  | 0.11  |
| 19             | 8 | -0.01     | 0.00  | 0.00  | 0.00      | 0.03  | 0.04  | -0.03     | -0.03 | -0.04 |
| 20             | 8 | -0.04     | 0.00  | 0.00  | 0.11      | -0.01 | 0.03  | -0.14     | -0.01 | -0.06 |
| 21             | 1 | 0.34      | 0.03  | 0.19  | -0.51     | -0.06 | -0.26 | 0.56      | 0.06  | 0.27  |
|                |   | 43        |       |       | 44        |       |       | 45        |       |       |
|                |   | A         |       |       | A         |       |       | A         |       |       |
| Frequencies -- |   | 1390.2970 |       |       | 1400.1353 |       |       | 1502.8715 |       |       |
| Red. masses -- |   | 2.4830    |       |       | 3.2260    |       |       | 2.5155    |       |       |
| Frc consts --  |   | 2.8278    |       |       | 3.7261    |       |       | 3.3474    |       |       |
| IR Inten --    |   | 93.8464   |       |       | 76.5178   |       |       | 7.6677    |       |       |
| Raman Activ -- |   | 11.7423   |       |       | 6.2536    |       |       | 0.2883    |       |       |
| Depolar (P) -- |   | 0.1190    |       |       | 0.4721    |       |       | 0.3540    |       |       |
| Depolar (U) -- |   | 0.2127    |       |       | 0.6414    |       |       | 0.5229    |       |       |
| Atom AN        |   | X         | Y     | Z     | X         | Y     | Z     | X         | Y     | Z     |
| 1              | 6 | 0.01      | 0.06  | 0.00  | -0.01     | -0.03 | 0.00  | 0.20      | 0.00  | 0.00  |
| 2              | 6 | -0.05     | -0.02 | 0.00  | -0.01     | 0.07  | 0.00  | -0.03     | 0.14  | -0.01 |
| 3              | 6 | -0.02     | -0.12 | 0.01  | 0.13      | 0.01  | 0.00  | -0.10     | -0.11 | 0.01  |
| 4              | 6 | -0.01     | -0.01 | 0.00  | 0.01      | -0.09 | 0.00  | 0.11      | -0.01 | 0.00  |
| 5              | 6 | -0.02     | -0.09 | 0.00  | -0.09     | -0.01 | 0.00  | -0.07     | 0.12  | 0.00  |
| 6              | 6 | 0.03      | 0.02  | 0.00  | 0.03      | 0.01  | 0.00  | -0.03     | -0.13 | 0.01  |
| 7              | 1 | 0.07      | 0.07  | 0.00  | -0.09     | -0.04 | 0.00  | -0.68     | -0.02 | 0.01  |
| 8              | 1 | 0.18      | 0.43  | -0.03 | -0.08     | -0.06 | 0.01  | -0.31     | -0.35 | 0.03  |
| 9              | 1 | -0.09     | 0.23  | -0.02 | -0.06     | 0.15  | -0.01 | -0.31     | 0.28  | -0.02 |
| 10             | 6 | 0.04      | 0.16  | 0.10  | 0.06      | 0.24  | 0.14  | -0.02     | 0.00  | 0.01  |
| 11             | 8 | -0.01     | -0.01 | -0.03 | -0.02     | -0.01 | -0.04 | 0.00      | 0.00  | -0.01 |
| 12             | 8 | -0.01     | -0.07 | -0.02 | -0.01     | -0.09 | -0.02 | 0.00      | 0.00  | 0.00  |
| 13             | 1 | -0.16     | -0.12 | -0.43 | -0.24     | -0.17 | -0.62 | 0.01      | 0.00  | 0.00  |
| 14             | 6 | 0.21      | -0.03 | 0.03  | -0.23     | 0.03  | -0.02 | 0.04      | -0.01 | 0.01  |
| 15             | 8 | -0.02     | 0.05  | -0.02 | 0.03      | -0.03 | 0.01  | 0.00      | 0.02  | -0.01 |
| 16             | 8 | -0.07     | -0.03 | 0.00  | 0.07      | 0.02  | 0.00  | -0.01     | 0.00  | 0.00  |
| 17             | 1 | -0.39     | 0.41  | -0.18 | 0.34      | -0.36 | 0.16  | -0.03     | 0.04  | -0.02 |
| 18             | 6 | -0.01     | 0.01  | -0.02 | 0.06      | 0.00  | 0.02  | 0.02      | -0.01 | 0.02  |

|                |   |           |       |       |       |           |       |       |           |           |       |       |
|----------------|---|-----------|-------|-------|-------|-----------|-------|-------|-----------|-----------|-------|-------|
| 19             | 8 | 0.00      | 0.01  | 0.01  | -0.01 | -0.01     | -0.01 | 0.00  | -0.01     | -0.01     |       |       |
| 20             | 8 | 0.01      | 0.00  | 0.00  | -0.02 | 0.00      | -0.01 | 0.00  | 0.00      | 0.00      |       |       |
| 21             | 1 | -0.04     | -0.01 | -0.02 | 0.08  | 0.00      | 0.04  | 0.01  | -0.01     | 0.01      |       |       |
|                |   | 46        |       |       | 47    |           |       | 48    |           |           |       |       |
|                |   | A         |       |       | A     |           |       | A     |           |           |       |       |
| Frequencies -- |   | 1517.2578 |       |       |       | 1660.4119 |       |       | 1664.3328 |           |       |       |
| Red. masses -- |   | 4.3903    |       |       |       | 7.5967    |       |       | 6.2507    |           |       |       |
| Frc consts --  |   | 5.9547    |       |       |       | 12.3398   |       |       | 10.2014   |           |       |       |
| IR Inten --    |   | 8.6855    |       |       |       | 36.5590   |       |       | 5.8748    |           |       |       |
| Raman Activ -- |   | 5.5714    |       |       |       | 28.7092   |       |       | 19.0537   |           |       |       |
| Depolar (P) -- |   | 0.3187    |       |       |       | 0.6951    |       |       | 0.7434    |           |       |       |
| Depolar (U) -- |   | 0.4833    |       |       |       | 0.8202    |       |       | 0.8528    |           |       |       |
| Atom AN        |   | X         | Y     | Z     |       | X         | Y     | Z     |           | X         | Y     | Z     |
| 1              | 6 | 0.00      | 0.10  | -0.01 |       | 0.41      | 0.00  | -0.01 |           | -0.04     | -0.18 | 0.01  |
| 2              | 6 | -0.10     | -0.07 | 0.00  |       | -0.23     | -0.09 | 0.01  |           | 0.14      | 0.33  | -0.02 |
| 3              | 6 | 0.23      | -0.13 | 0.00  |       | 0.28      | -0.08 | 0.00  |           | 0.02      | -0.28 | 0.02  |
| 4              | 6 | 0.01      | 0.28  | 0.00  |       | -0.37     | 0.01  | 0.01  |           | 0.02      | 0.18  | 0.00  |
| 5              | 6 | -0.23     | -0.11 | 0.00  |       | 0.26      | 0.03  | 0.00  |           | -0.04     | -0.29 | 0.00  |
| 6              | 6 | 0.12      | -0.10 | 0.00  |       | -0.25     | 0.14  | 0.00  |           | -0.11     | 0.31  | -0.01 |
| 7              | 1 | -0.05     | 0.12  | 0.00  |       | -0.45     | -0.03 | 0.01  |           | 0.05      | -0.21 | 0.01  |
| 8              | 1 | 0.17      | 0.48  | -0.03 |       | -0.06     | 0.28  | -0.01 |           | -0.27     | -0.42 | 0.03  |
| 9              | 1 | -0.27     | 0.55  | -0.04 |       | 0.02      | -0.34 | 0.02  |           | 0.31      | -0.36 | 0.03  |
| 10             | 6 | -0.03     | -0.13 | -0.08 |       | 0.03      | 0.01  | -0.03 |           | -0.02     | -0.03 | -0.03 |
| 11             | 8 | 0.01      | 0.00  | 0.03  |       | 0.00      | -0.01 | 0.02  |           | 0.01      | 0.00  | 0.02  |
| 12             | 8 | 0.01      | 0.03  | 0.02  |       | 0.00      | 0.00  | 0.00  |           | 0.00      | 0.01  | 0.01  |
| 13             | 1 | 0.06      | 0.04  | 0.16  |       | -0.02     | 0.00  | 0.01  |           | 0.01      | 0.01  | 0.02  |
| 14             | 6 | -0.11     | 0.01  | 0.00  |       | -0.06     | -0.01 | 0.01  |           | -0.01     | -0.02 | 0.02  |
| 15             | 8 | 0.01      | 0.00  | 0.00  |       | 0.01      | 0.01  | -0.01 |           | 0.01      | 0.04  | -0.01 |
| 16             | 8 | 0.01      | -0.01 | 0.00  |       | 0.00      | 0.00  | 0.00  |           | 0.00      | 0.00  | 0.00  |
| 17             | 1 | 0.04      | -0.05 | 0.02  |       | 0.02      | -0.03 | 0.01  |           | 0.00      | -0.01 | -0.01 |
| 18             | 6 | 0.08      | 0.02  | 0.01  |       | -0.05     | -0.01 | 0.00  |           | 0.01      | 0.01  | -0.02 |
| 19             | 8 | -0.01     | -0.01 | 0.00  |       | 0.00      | 0.00  | 0.00  |           | -0.01     | 0.01  | 0.02  |
| 20             | 8 | -0.01     | -0.01 | -0.01 |       | 0.00      | 0.00  | 0.00  |           | 0.00      | 0.00  | 0.00  |
| 21             | 1 | 0.06      | -0.01 | 0.04  |       | -0.02     | 0.00  | -0.01 |           | 0.02      | 0.01  | 0.00  |
|                |   | 49        |       |       |       | 50        |       |       |           | 51        |       |       |
|                |   | A         |       |       |       | A         |       |       |           | A         |       |       |
| Frequencies -- |   | 1851.5188 |       |       |       | 1859.3550 |       |       |           | 1888.1898 |       |       |
| Red. masses -- |   | 10.6255   |       |       |       | 10.9588   |       |       |           | 11.1433   |       |       |
| Frc consts --  |   | 21.4613   |       |       |       | 22.3223   |       |       |           | 23.4075   |       |       |
| IR Inten --    |   | 239.4496  |       |       |       | 424.8398  |       |       |           | 341.6463  |       |       |
| Raman Activ -- |   | 42.3414   |       |       |       | 23.6627   |       |       |           | 40.9328   |       |       |
| Depolar (P) -- |   | 0.3102    |       |       |       | 0.1765    |       |       |           | 0.1405    |       |       |
| Depolar (U) -- |   | 0.4735    |       |       |       | 0.3000    |       |       |           | 0.2464    |       |       |
| Atom AN        |   | X         | Y     | Z     |       | X         | Y     | Z     |           | X         | Y     | Z     |
| 1              | 6 | 0.02      | 0.00  | 0.00  |       | 0.00      | 0.00  | 0.00  |           | -0.01     | 0.00  | 0.00  |
| 2              | 6 | -0.01     | 0.02  | 0.00  |       | 0.00      | 0.00  | 0.00  |           | 0.00      | 0.01  | 0.00  |
| 3              | 6 | -0.02     | -0.10 | 0.01  |       | 0.01      | 0.01  | 0.00  |           | -0.01     | -0.02 | 0.00  |
| 4              | 6 | -0.01     | 0.04  | -0.01 |       | -0.02     | 0.06  | -0.02 |           | 0.00      | 0.01  | 0.00  |
| 5              | 6 | 0.01      | -0.01 | 0.00  |       | 0.01      | -0.02 | 0.00  |           | 0.03      | -0.06 | -0.02 |
| 6              | 6 | -0.01     | 0.01  | 0.00  |       | -0.01     | 0.00  | 0.00  |           | 0.01      | 0.01  | 0.00  |
| 7              | 1 | -0.02     | -0.01 | 0.00  |       | 0.00      | 0.00  | 0.00  |           | 0.00      | 0.00  | 0.00  |
| 8              | 1 | -0.04     | -0.01 | 0.00  |       | 0.00      | -0.01 | 0.00  |           | -0.01     | -0.01 | 0.00  |
| 9              | 1 | 0.01      | -0.02 | 0.00  |       | 0.01      | -0.02 | 0.00  |           | 0.02      | -0.01 | 0.00  |
| 10             | 6 | 0.06      | -0.06 | 0.11  |       | 0.28      | -0.38 | 0.57  |           | -0.04     | 0.06  | -0.07 |
| 11             | 8 | -0.03     | 0.04  | -0.07 |       | -0.18     | 0.23  | -0.37 |           | 0.03      | -0.03 | 0.05  |
| 12             | 8 | -0.01     | 0.00  | -0.01 |       | -0.03     | 0.01  | -0.07 |           | 0.00      | -0.01 | 0.00  |
| 13             | 1 | 0.04      | 0.01  | 0.05  |       | 0.14      | 0.07  | 0.38  |           | -0.04     | -0.02 | -0.06 |
| 14             | 6 | 0.09      | 0.68  | -0.24 |       | -0.02     | -0.12 | 0.04  |           | 0.02      | 0.09  | -0.03 |
| 15             | 8 | -0.04     | -0.43 | 0.15  |       | 0.01      | 0.07  | -0.03 |           | -0.01     | -0.06 | 0.02  |
| 16             | 8 | 0.01      | -0.06 | 0.02  |       | 0.00      | 0.01  | 0.00  |           | 0.00      | -0.01 | 0.00  |

|                |    |           |       |       |           |       |       |           |       |       |
|----------------|----|-----------|-------|-------|-----------|-------|-------|-----------|-------|-------|
| 17             | 1  | -0.28     | 0.32  | -0.14 | 0.05      | -0.05 | 0.03  | -0.04     | 0.04  | -0.02 |
| 18             | 6  | 0.02      | -0.06 | -0.05 | -0.02     | 0.08  | 0.08  | -0.18     | 0.55  | 0.49  |
| 19             | 8  | -0.01     | 0.04  | 0.04  | 0.02      | -0.05 | -0.05 | 0.11      | -0.35 | -0.31 |
| 20             | 8  | 0.00      | 0.00  | 0.00  | 0.00      | 0.00  | -0.01 | 0.03      | -0.03 | -0.03 |
| 21             | 1  | 0.03      | 0.01  | 0.01  | -0.05     | -0.02 | -0.01 | -0.35     | -0.06 | -0.17 |
|                |    | 52        |       |       | 53        |       |       | 54        |       |       |
|                |    | A         |       |       | A         |       |       | A         |       |       |
| Frequencies -- |    | 3197.2236 |       |       | 3219.9720 |       |       | 3243.3981 |       |       |
| Red. masses -- |    | 1.0897    |       |       | 1.0934    |       |       | 1.0949    |       |       |
| Frc consts --  |    | 6.5629    |       |       | 6.6793    |       |       | 6.7864    |       |       |
| IR Inten --    |    | 1.1114    |       |       | 4.2330    |       |       | 1.3453    |       |       |
| Raman Activ -- |    | 61.3935   |       |       | 125.7513  |       |       | 121.4530  |       |       |
| Depolar (P) -- |    | 0.4796    |       |       | 0.2932    |       |       | 0.1767    |       |       |
| Depolar (U) -- |    | 0.6483    |       |       | 0.4535    |       |       | 0.3004    |       |       |
| Atom           | AN | X         | Y     | Z     | X         | Y     | Z     | X         | Y     | Z     |
| 1              | 6  | 0.00      | 0.03  | 0.00  | 0.00      | -0.08 | 0.00  | 0.00      | 0.03  | 0.00  |
| 2              | 6  | 0.00      | 0.00  | 0.00  | -0.02     | 0.01  | 0.00  | -0.07     | 0.04  | 0.00  |
| 3              | 6  | 0.00      | 0.00  | 0.00  | 0.00      | 0.00  | 0.00  | 0.00      | 0.00  | 0.00  |
| 4              | 6  | 0.00      | 0.00  | 0.00  | 0.00      | 0.00  | 0.00  | 0.00      | 0.00  | 0.00  |
| 5              | 6  | 0.00      | 0.00  | 0.00  | 0.00      | 0.00  | 0.00  | 0.00      | 0.00  | 0.00  |
| 6              | 6  | -0.07     | -0.04 | 0.00  | -0.03     | -0.01 | 0.00  | 0.01      | 0.00  | 0.00  |
| 7              | 1  | 0.01      | -0.35 | 0.02  | -0.03     | 0.88  | -0.05 | 0.00      | -0.30 | 0.02  |
| 8              | 1  | -0.05     | 0.03  | 0.00  | 0.27      | -0.15 | 0.00  | 0.84      | -0.44 | 0.00  |
| 9              | 1  | 0.79      | 0.48  | -0.05 | 0.30      | 0.18  | -0.02 | -0.05     | -0.03 | 0.00  |
| 10             | 6  | 0.00      | 0.00  | 0.00  | 0.00      | 0.00  | 0.00  | 0.00      | 0.00  | 0.00  |
| 11             | 8  | 0.00      | 0.00  | 0.00  | 0.00      | 0.00  | 0.00  | 0.00      | 0.00  | 0.00  |
| 12             | 8  | 0.00      | 0.00  | 0.00  | 0.00      | 0.00  | 0.00  | 0.00      | 0.00  | 0.00  |
| 13             | 1  | 0.00      | 0.00  | 0.00  | 0.00      | 0.00  | 0.00  | 0.00      | 0.00  | 0.00  |
| 14             | 6  | 0.00      | 0.00  | 0.00  | 0.00      | 0.00  | 0.00  | 0.00      | 0.00  | 0.00  |
| 15             | 8  | 0.00      | 0.00  | 0.00  | 0.00      | 0.00  | 0.00  | 0.00      | 0.00  | 0.00  |
| 16             | 8  | 0.00      | 0.00  | 0.00  | 0.00      | 0.00  | 0.00  | 0.00      | 0.00  | 0.00  |
| 17             | 1  | 0.00      | 0.00  | 0.00  | 0.00      | 0.00  | 0.00  | 0.00      | 0.00  | 0.00  |
| 18             | 6  | 0.00      | 0.00  | 0.00  | 0.00      | 0.00  | 0.00  | 0.00      | 0.00  | 0.00  |
| 19             | 8  | 0.00      | 0.00  | 0.00  | 0.00      | 0.00  | 0.00  | 0.00      | 0.00  | 0.00  |
| 20             | 8  | 0.00      | 0.00  | 0.00  | 0.00      | 0.00  | 0.00  | 0.00      | 0.00  | 0.00  |
| 21             | 1  | 0.00      | 0.00  | 0.00  | 0.00      | 0.00  | 0.00  | 0.00      | 0.00  | 0.00  |
|                |    | 55        |       |       | 56        |       |       | 57        |       |       |
|                |    | A         |       |       | A         |       |       | A         |       |       |
| Frequencies -- |    | 3839.4755 |       |       | 3849.4091 |       |       | 3884.8297 |       |       |
| Red. masses -- |    | 1.0643    |       |       | 1.0648    |       |       | 1.0662    |       |       |
| Frc consts --  |    | 9.2439    |       |       | 9.2959    |       |       | 9.4804    |       |       |
| IR Inten --    |    | 112.5035  |       |       | 128.7161  |       |       | 59.7886   |       |       |
| Raman Activ -- |    | 123.1417  |       |       | 131.3467  |       |       | 46.3328   |       |       |
| Depolar (P) -- |    | 0.2735    |       |       | 0.2408    |       |       | 0.1464    |       |       |
| Depolar (U) -- |    | 0.4295    |       |       | 0.3882    |       |       | 0.2555    |       |       |
| Atom           | AN | X         | Y     | Z     | X         | Y     | Z     | X         | Y     | Z     |
| 1              | 6  | 0.00      | 0.00  | 0.00  | 0.00      | 0.00  | 0.00  | 0.00      | 0.00  | 0.00  |
| 2              | 6  | 0.00      | 0.00  | 0.00  | 0.00      | 0.00  | 0.00  | 0.00      | 0.00  | 0.00  |
| 3              | 6  | 0.00      | 0.00  | 0.00  | 0.00      | 0.00  | 0.00  | 0.00      | 0.00  | 0.00  |
| 4              | 6  | 0.00      | 0.00  | 0.00  | 0.00      | 0.00  | 0.00  | 0.00      | 0.00  | 0.00  |
| 5              | 6  | 0.00      | 0.00  | 0.00  | 0.00      | 0.00  | 0.00  | 0.00      | 0.00  | 0.00  |
| 6              | 6  | 0.00      | 0.00  | 0.00  | 0.00      | 0.00  | 0.00  | 0.00      | 0.00  | 0.00  |
| 7              | 1  | 0.00      | 0.00  | 0.00  | 0.00      | 0.00  | 0.00  | 0.00      | 0.00  | 0.00  |
| 8              | 1  | 0.00      | 0.00  | 0.00  | 0.00      | 0.00  | 0.00  | 0.00      | 0.00  | 0.00  |
| 9              | 1  | 0.00      | 0.00  | 0.00  | 0.00      | 0.00  | 0.00  | 0.00      | 0.00  | 0.00  |
| 10             | 6  | 0.00      | 0.00  | 0.00  | 0.00      | 0.00  | 0.00  | 0.00      | 0.00  | 0.00  |
| 11             | 8  | 0.00      | 0.00  | 0.00  | 0.00      | 0.00  | 0.00  | 0.00      | 0.00  | 0.00  |
| 12             | 8  | 0.01      | -0.06 | 0.01  | 0.00      | 0.00  | 0.00  | 0.00      | 0.00  | 0.00  |
| 13             | 1  | -0.08     | 0.99  | -0.11 | 0.00      | 0.04  | 0.00  | 0.00      | 0.00  | 0.00  |
| 14             | 6  | 0.00      | 0.00  | 0.00  | 0.00      | 0.00  | 0.00  | 0.00      | 0.00  | 0.00  |

|    |   |       |       |      |       |       |       |       |       |       |
|----|---|-------|-------|------|-------|-------|-------|-------|-------|-------|
| 15 | 8 | 0.00  | 0.00  | 0.00 | 0.00  | 0.00  | 0.00  | 0.00  | 0.00  | 0.00  |
| 16 | 8 | 0.00  | 0.00  | 0.00 | -0.05 | -0.03 | 0.01  | 0.00  | 0.00  | 0.00  |
| 17 | 1 | -0.03 | -0.02 | 0.01 | 0.81  | 0.55  | -0.15 | 0.00  | 0.00  | 0.00  |
| 18 | 6 | 0.00  | 0.00  | 0.00 | 0.00  | 0.00  | 0.00  | 0.00  | 0.00  | 0.00  |
| 19 | 8 | 0.00  | 0.00  | 0.00 | 0.00  | 0.00  | 0.00  | 0.00  | 0.00  | 0.00  |
| 20 | 8 | 0.00  | 0.00  | 0.00 | 0.00  | 0.00  | 0.00  | 0.02  | -0.04 | -0.04 |
| 21 | 1 | 0.00  | 0.00  | 0.00 | 0.00  | 0.00  | 0.00  | -0.39 | 0.59  | 0.70  |

# HEM-

Harmonic frequencies (cm\*\*-1), IR intensities (KM/Mole), Raman scattering activities (A\*\*4/AMU), depolarization ratios for plane and unpolarized incident light, reduced masses (AMU), force constants (mDyne/A), and normal coordinates:

|                |   | 1       |       | 2     |       | 3       |       |       |         |       |   |
|----------------|---|---------|-------|-------|-------|---------|-------|-------|---------|-------|---|
|                |   | A       |       | A     |       | A       |       |       |         |       |   |
| Frequencies -- |   | 29.8182 |       |       |       | 49.3968 |       |       | 98.5185 |       |   |
| Red. masses -- |   | 12.3349 |       |       |       | 9.8566  |       |       | 11.2020 |       |   |
| Frc consts --  |   | 0.0065  |       |       |       | 0.0142  |       |       | 0.0641  |       |   |
| IR Inten --    |   | 0.4852  |       |       |       | 1.4278  |       |       | 8.4491  |       |   |
| Raman Activ -- |   | 0.8370  |       |       |       | 0.6831  |       |       | 1.2867  |       |   |
| Depolar (P) -- |   | 0.7500  |       |       |       | 0.7500  |       |       | 0.7500  |       |   |
| Depolar (U) -- |   | 0.8571  |       |       |       | 0.8571  |       |       | 0.8571  |       |   |
| Atom AN        |   | X       | Y     | Z     |       | X       | Y     | Z     | X       | Y     | Z |
| 1              | 6 | 0.00    | 0.01  | 0.00  | 0.02  | 0.00    | 0.05  | -0.06 | 0.00    | 0.12  |   |
| 2              | 6 | 0.00    | 0.02  | 0.01  | 0.01  | -0.01   | 0.05  | -0.05 | 0.02    | 0.06  |   |
| 3              | 6 | 0.00    | 0.02  | 0.00  | 0.00  | -0.01   | 0.16  | 0.00  | 0.02    | -0.05 |   |
| 4              | 1 | 0.00    | 0.02  | 0.01  | 0.00  | -0.01   | 0.18  | 0.01  | 0.04    | -0.11 |   |
| 5              | 6 | 0.00    | 0.03  | 0.00  | 0.00  | 0.00    | 0.24  | 0.01  | 0.00    | -0.09 |   |
| 6              | 1 | 0.00    | 0.03  | 0.00  | -0.01 | 0.00    | 0.34  | 0.03  | 0.00    | -0.17 |   |
| 7              | 6 | 0.00    | 0.02  | 0.00  | 0.00  | 0.01    | 0.16  | 0.00  | -0.02   | -0.05 |   |
| 8              | 8 | -0.16   | -0.27 | 0.10  | -0.21 | -0.08   | -0.12 | -0.09 | 0.19    | -0.18 |   |
| 9              | 1 | -0.17   | -0.27 | 0.13  | -0.18 | -0.07   | -0.23 | -0.10 | 0.13    | -0.30 |   |
| 10             | 8 | -0.19   | 0.01  | 0.40  | 0.00  | 0.02    | 0.18  | 0.24  | 0.20    | 0.14  |   |
| 11             | 6 | 0.00    | 0.03  | 0.03  | 0.02  | -0.02   | -0.13 | -0.08 | 0.10    | -0.01 |   |
| 12             | 8 | -0.10   | 0.20  | 0.14  | 0.19  | -0.10   | -0.30 | -0.08 | 0.32    | 0.01  |   |
| 13             | 6 | 0.00    | 0.02  | -0.01 | 0.01  | 0.01    | 0.05  | -0.05 | -0.02   | 0.06  |   |
| 14             | 6 | 0.00    | 0.01  | 0.00  | 0.01  | 0.00    | 0.14  | 0.12  | 0.00    | 0.14  |   |
| 15             | 6 | 0.00    | 0.03  | -0.03 | 0.02  | 0.02    | -0.13 | -0.08 | -0.10   | -0.01 |   |
| 16             | 8 | 0.19    | 0.01  | -0.40 | 0.00  | -0.02   | 0.18  | 0.24  | -0.20   | 0.14  |   |
| 17             | 1 | 0.00    | 0.02  | -0.01 | 0.00  | 0.01    | 0.18  | 0.01  | -0.04   | -0.11 |   |
| 18             | 8 | 0.10    | 0.20  | -0.14 | 0.19  | 0.10    | -0.30 | -0.08 | -0.32   | 0.01  |   |
| 19             | 8 | 0.16    | -0.27 | -0.10 | -0.21 | 0.08    | -0.12 | -0.09 | -0.19   | -0.18 |   |
| 20             | 1 | 0.17    | -0.27 | -0.13 | -0.18 | 0.07    | -0.23 | -0.10 | -0.13   | -0.30 |   |

|                |   | 4        |       | 5    |      | 6        |       |       |          |      |   |
|----------------|---|----------|-------|------|------|----------|-------|-------|----------|------|---|
|                |   | A        |       | A    |      | A        |       |       |          |      |   |
| Frequencies -- |   | 125.0010 |       |      |      | 146.3385 |       |       | 149.8282 |      |   |
| Red. masses -- |   | 9.4156   |       |      |      | 6.8782   |       |       | 5.4551   |      |   |
| Frc consts --  |   | 0.0867   |       |      |      | 0.0868   |       |       | 0.0722   |      |   |
| IR Inten --    |   | 0.1607   |       |      |      | 6.9506   |       |       | 3.0346   |      |   |
| Raman Activ -- |   | 1.4554   |       |      |      | 2.2779   |       |       | 3.0303   |      |   |
| Depolar (P) -- |   | 0.7116   |       |      |      | 0.7500   |       |       | 0.7486   |      |   |
| Depolar (U) -- |   | 0.8315   |       |      |      | 0.8571   |       |       | 0.8562   |      |   |
| Atom AN        |   | X        | Y     | Z    |      | X        | Y     | Z     | X        | Y    | Z |
| 1              | 6 | 0.00     | -0.11 | 0.00 | 0.04 | 0.00     | 0.25  | 0.00  | 0.06     | 0.00 |   |
| 2              | 6 | 0.00     | -0.09 | 0.06 | 0.03 | -0.01    | 0.17  | -0.01 | 0.05     | 0.18 |   |
| 3              | 6 | 0.01     | -0.09 | 0.07 | 0.01 | -0.02    | -0.08 | -0.01 | 0.05     | 0.27 |   |
| 4              | 1 | 0.00     | -0.09 | 0.11 | 0.01 | -0.04    | -0.23 | -0.02 | 0.06     | 0.47 |   |
| 5              | 6 | 0.00     | -0.08 | 0.00 | 0.01 | 0.00     | -0.23 | 0.00  | 0.04     | 0.00 |   |
| 6              | 1 | 0.00     | -0.08 | 0.00 | 0.00 | 0.00     | -0.48 | 0.00  | 0.04     | 0.00 |   |

|    |   |       |       |       |       |       |       |       |       |       |
|----|---|-------|-------|-------|-------|-------|-------|-------|-------|-------|
| 7  | 6 | -0.01 | -0.09 | -0.07 | 0.01  | 0.02  | -0.08 | 0.01  | 0.05  | -0.27 |
| 8  | 8 | 0.21  | -0.05 | 0.08  | -0.05 | 0.18  | -0.05 | 0.09  | -0.13 | 0.03  |
| 9  | 1 | 0.35  | 0.17  | 0.16  | 0.02  | 0.25  | -0.21 | 0.00  | -0.22 | 0.20  |
| 10 | 8 | 0.07  | -0.13 | -0.13 | -0.14 | -0.20 | -0.02 | 0.00  | 0.07  | 0.00  |
| 11 | 6 | -0.09 | 0.08  | 0.02  | 0.05  | -0.06 | 0.04  | 0.03  | -0.03 | 0.05  |
| 12 | 8 | -0.07 | 0.37  | 0.04  | 0.13  | 0.03  | -0.02 | 0.15  | -0.04 | -0.06 |
| 13 | 6 | 0.00  | -0.09 | -0.06 | 0.03  | 0.01  | 0.17  | 0.01  | 0.05  | -0.18 |
| 14 | 6 | 0.00  | -0.13 | 0.00  | -0.07 | 0.00  | 0.08  | 0.00  | 0.07  | 0.00  |
| 15 | 6 | 0.09  | 0.08  | -0.02 | 0.05  | 0.06  | 0.04  | -0.03 | -0.03 | -0.05 |
| 16 | 8 | -0.07 | -0.13 | 0.13  | -0.14 | 0.20  | -0.02 | 0.00  | 0.07  | 0.00  |
| 17 | 1 | 0.00  | -0.09 | -0.11 | 0.01  | 0.04  | -0.23 | 0.02  | 0.06  | -0.48 |
| 18 | 8 | 0.07  | 0.37  | -0.04 | 0.13  | -0.03 | -0.02 | -0.15 | -0.04 | 0.06  |
| 19 | 8 | -0.21 | -0.05 | -0.08 | -0.05 | -0.18 | -0.05 | -0.09 | -0.13 | -0.03 |
| 20 | 1 | -0.35 | 0.17  | -0.16 | 0.02  | -0.25 | -0.21 | 0.00  | -0.22 | -0.20 |

|                |   |          |       |       |          |       |       |          |       |       |
|----------------|---|----------|-------|-------|----------|-------|-------|----------|-------|-------|
|                |   | 7        |       |       | 8        |       |       | 9        |       |       |
|                |   | A        |       |       | A        |       |       | A        |       |       |
| Frequencies -- |   | 172.8208 |       |       | 179.6967 |       |       | 250.8685 |       |       |
| Red. masses -- |   | 6.1474   |       |       | 6.3499   |       |       | 4.6950   |       |       |
| Frc consts --  |   | 0.1082   |       |       | 0.1208   |       |       | 0.1741   |       |       |
| IR Inten --    |   | 7.8566   |       |       | 20.3580  |       |       | 0.0709   |       |       |
| Raman Activ -- |   | 1.6212   |       |       | 0.0026   |       |       | 3.2981   |       |       |
| Depolar (P) -- |   | 0.7449   |       |       | 0.7500   |       |       | 0.7500   |       |       |
| Depolar (U) -- |   | 0.8538   |       |       | 0.8571   |       |       | 0.8571   |       |       |
| Atom AN        |   | X        | Y     | Z     | X        | Y     | Z     | X        | Y     | Z     |
| 1              | 6 | 0.00     | 0.06  | 0.00  | 0.01     | 0.00  | 0.15  | -0.15    | 0.00  | 0.10  |
| 2              | 6 | 0.00     | 0.05  | -0.05 | -0.01    | -0.03 | 0.11  | -0.08    | 0.13  | 0.09  |
| 3              | 6 | 0.00     | 0.05  | -0.09 | -0.03    | -0.03 | -0.03 | 0.09     | 0.14  | 0.01  |
| 4              | 1 | 0.00     | 0.05  | -0.16 | -0.03    | -0.05 | -0.11 | 0.16     | 0.26  | -0.02 |
| 5              | 6 | 0.00     | 0.05  | 0.00  | -0.04    | 0.00  | -0.13 | 0.18     | 0.00  | -0.05 |
| 6              | 1 | 0.00     | 0.05  | 0.00  | -0.07    | 0.00  | -0.29 | 0.32     | 0.00  | -0.14 |
| 7              | 6 | 0.00     | 0.05  | 0.09  | -0.03    | 0.03  | -0.03 | 0.09     | -0.14 | 0.01  |
| 8              | 8 | -0.16    | -0.20 | 0.11  | -0.20    | -0.14 | 0.10  | 0.01     | 0.02  | 0.01  |
| 9              | 1 | -0.31    | -0.40 | 0.18  | -0.34    | -0.35 | 0.11  | 0.25     | 0.35  | -0.10 |
| 10             | 8 | 0.11     | 0.05  | -0.24 | 0.18     | -0.02 | -0.19 | 0.01     | 0.12  | -0.07 |
| 11             | 6 | 0.04     | -0.02 | -0.04 | -0.03    | 0.02  | 0.07  | -0.06    | 0.07  | 0.03  |
| 12             | 8 | -0.02    | 0.04  | 0.01  | 0.05     | -0.01 | -0.01 | 0.00     | -0.15 | -0.04 |
| 13             | 6 | 0.00     | 0.05  | 0.05  | -0.01    | 0.03  | 0.11  | -0.08    | -0.13 | 0.09  |
| 14             | 6 | 0.00     | 0.06  | 0.00  | 0.13     | 0.00  | -0.07 | -0.09    | 0.00  | -0.01 |
| 15             | 6 | -0.04    | -0.02 | 0.04  | -0.03    | -0.02 | 0.07  | -0.06    | -0.07 | 0.03  |
| 16             | 8 | -0.11    | 0.05  | 0.24  | 0.18     | 0.02  | -0.18 | 0.01     | -0.12 | -0.07 |
| 17             | 1 | 0.00     | 0.05  | 0.16  | -0.03    | 0.05  | -0.11 | 0.16     | -0.26 | -0.02 |
| 18             | 8 | 0.02     | 0.04  | -0.01 | 0.05     | 0.01  | -0.01 | 0.00     | 0.15  | -0.04 |
| 19             | 8 | 0.16     | -0.20 | -0.11 | -0.20    | 0.14  | 0.10  | 0.01     | -0.02 | 0.01  |
| 20             | 1 | 0.32     | -0.40 | -0.18 | -0.34    | 0.35  | 0.11  | 0.25     | -0.35 | -0.10 |

|                |   |          |       |       |          |       |       |          |      |       |
|----------------|---|----------|-------|-------|----------|-------|-------|----------|------|-------|
|                |   | 10       |       |       | 11       |       |       | 12       |      |       |
|                |   | A        |       |       | A        |       |       | A        |      |       |
| Frequencies -- |   | 280.6779 |       |       | 339.8337 |       |       | 368.5589 |      |       |
| Red. masses -- |   | 9.8108   |       |       | 5.2317   |       |       | 10.5263  |      |       |
| Frc consts --  |   | 0.4554   |       |       | 0.3560   |       |       | 0.8424   |      |       |
| IR Inten --    |   | 0.5797   |       |       | 0.0492   |       |       | 1.8985   |      |       |
| Raman Activ -- |   | 4.3147   |       |       | 0.6420   |       |       | 0.0087   |      |       |
| Depolar (P) -- |   | 0.5359   |       |       | 0.2337   |       |       | 0.7500   |      |       |
| Depolar (U) -- |   | 0.6978   |       |       | 0.3789   |       |       | 0.8571   |      |       |
| Atom AN        |   | X        | Y     | Z     | X        | Y     | Z     | X        | Y    | Z     |
| 1              | 6 | 0.00     | 0.10  | 0.00  | 0.00     | 0.00  | 0.00  | -0.02    | 0.00 | 0.40  |
| 2              | 6 | -0.10    | -0.04 | -0.03 | 0.02     | 0.01  | 0.10  | -0.05    | 0.02 | -0.04 |
| 3              | 6 | -0.05    | -0.05 | -0.09 | 0.01     | 0.01  | -0.26 | 0.03     | 0.02 | -0.05 |
| 4              | 1 | -0.01    | 0.02  | -0.17 | 0.01     | -0.01 | -0.55 | 0.06     | 0.06 | -0.21 |
| 5              | 6 | 0.00     | -0.11 | 0.00  | 0.00     | 0.02  | 0.00  | 0.05     | 0.00 | 0.19  |
| 6              | 1 | 0.00     | -0.10 | 0.00  | 0.00     | 0.02  | 0.00  | 0.07     | 0.00 | 0.33  |

|    |   |       |       |       |       |       |       |       |       |       |
|----|---|-------|-------|-------|-------|-------|-------|-------|-------|-------|
| 7  | 6 | 0.05  | -0.05 | 0.09  | -0.01 | 0.01  | 0.26  | 0.03  | -0.02 | -0.05 |
| 8  | 8 | 0.23  | -0.12 | 0.00  | 0.11  | -0.07 | -0.08 | 0.11  | -0.08 | -0.09 |
| 9  | 1 | 0.37  | 0.08  | 0.04  | 0.04  | -0.11 | 0.11  | 0.14  | 0.01  | 0.08  |
| 10 | 8 | 0.02  | 0.29  | 0.01  | -0.01 | 0.01  | 0.02  | 0.13  | -0.28 | -0.01 |
| 11 | 6 | -0.15 | -0.12 | 0.00  | 0.06  | 0.00  | 0.14  | -0.09 | 0.04  | -0.15 |
| 12 | 8 | -0.23 | -0.10 | 0.07  | 0.20  | 0.04  | 0.02  | -0.24 | -0.08 | -0.04 |
| 13 | 6 | 0.10  | -0.04 | 0.03  | -0.02 | 0.01  | -0.10 | -0.05 | -0.02 | -0.04 |
| 14 | 6 | 0.00  | 0.25  | 0.00  | 0.00  | 0.01  | 0.00  | 0.14  | 0.00  | 0.24  |
| 15 | 6 | 0.15  | -0.12 | 0.00  | -0.06 | 0.00  | -0.14 | -0.09 | -0.04 | -0.15 |
| 16 | 8 | -0.02 | 0.29  | -0.01 | 0.01  | 0.01  | -0.02 | 0.13  | 0.28  | -0.01 |
| 17 | 1 | 0.01  | 0.02  | 0.17  | -0.01 | -0.01 | 0.55  | 0.06  | -0.06 | -0.21 |
| 18 | 8 | 0.23  | -0.10 | -0.07 | -0.20 | 0.04  | -0.02 | -0.24 | 0.08  | -0.04 |
| 19 | 8 | -0.23 | -0.12 | 0.00  | -0.11 | -0.07 | 0.08  | 0.11  | 0.08  | -0.09 |
| 20 | 1 | -0.37 | 0.08  | -0.04 | -0.04 | -0.11 | -0.11 | 0.14  | -0.01 | 0.08  |

|                |  |          |  |          |  |          |  |  |  |  |
|----------------|--|----------|--|----------|--|----------|--|--|--|--|
|                |  | 13       |  | 14       |  | 15       |  |  |  |  |
|                |  | A        |  | A        |  | A        |  |  |  |  |
| Frequencies -- |  | 372.9349 |  | 398.2893 |  | 483.2768 |  |  |  |  |
| Red. masses -- |  | 6.3347   |  | 5.9428   |  | 1.4901   |  |  |  |  |
| Frc consts --  |  | 0.5191   |  | 0.5554   |  | 0.2050   |  |  |  |  |
| IR Inten --    |  | 3.0463   |  | 3.1098   |  | 63.9376  |  |  |  |  |
| Raman Activ -- |  | 0.3561   |  | 5.0904   |  | 0.3263   |  |  |  |  |
| Depolar (P) -- |  | 0.7500   |  | 0.2022   |  | 0.7500   |  |  |  |  |
| Depolar (U) -- |  | 0.8571   |  | 0.3364   |  | 0.8571   |  |  |  |  |

|      |    |       |       |       |       |       |       |       |       |       |
|------|----|-------|-------|-------|-------|-------|-------|-------|-------|-------|
| Atom | AN | X     | Y     | Z     | X     | Y     | Z     | X     | Y     | Z     |
| 1    | 6  | 0.08  | 0.00  | -0.18 | 0.00  | 0.06  | 0.00  | 0.02  | 0.00  | -0.08 |
| 2    | 6  | 0.04  | -0.05 | -0.06 | -0.04 | 0.14  | 0.04  | -0.01 | -0.01 | -0.03 |
| 3    | 6  | 0.23  | -0.03 | 0.01  | 0.00  | 0.17  | -0.04 | 0.00  | -0.01 | 0.00  |
| 4    | 1  | 0.28  | 0.07  | 0.11  | 0.01  | 0.19  | -0.09 | -0.01 | -0.02 | 0.05  |
| 5    | 6  | 0.25  | 0.00  | -0.02 | 0.00  | 0.19  | 0.00  | -0.01 | 0.00  | 0.00  |
| 6    | 1  | 0.19  | 0.00  | 0.02  | 0.00  | 0.20  | 0.00  | -0.03 | 0.00  | 0.04  |
| 7    | 6  | 0.23  | 0.03  | 0.01  | 0.00  | 0.17  | 0.04  | 0.00  | 0.01  | 0.00  |
| 8    | 8  | -0.18 | 0.12  | -0.01 | 0.12  | -0.03 | 0.02  | -0.05 | -0.03 | 0.04  |
| 9    | 1  | -0.37 | -0.17 | -0.09 | -0.16 | -0.40 | 0.24  | 0.38  | 0.56  | -0.16 |
| 10   | 8  | 0.00  | -0.06 | 0.05  | -0.03 | -0.19 | -0.01 | 0.02  | -0.05 | 0.01  |
| 11   | 6  | -0.06 | -0.08 | 0.03  | -0.13 | 0.09  | 0.04  | -0.03 | 0.03  | 0.03  |
| 12   | 8  | -0.13 | -0.10 | 0.08  | -0.13 | -0.12 | 0.02  | 0.01  | 0.02  | -0.01 |
| 13   | 6  | 0.04  | 0.05  | -0.06 | 0.04  | 0.14  | -0.04 | -0.01 | 0.01  | -0.03 |
| 14   | 6  | 0.07  | 0.00  | -0.04 | 0.00  | -0.13 | 0.00  | 0.06  | 0.00  | -0.01 |
| 15   | 6  | -0.06 | 0.08  | 0.03  | 0.13  | 0.09  | -0.04 | -0.03 | -0.03 | 0.03  |
| 16   | 8  | 0.00  | 0.06  | 0.05  | 0.03  | -0.19 | 0.01  | 0.02  | 0.05  | 0.01  |
| 17   | 1  | 0.28  | -0.07 | 0.11  | -0.01 | 0.19  | 0.09  | -0.01 | 0.02  | 0.05  |
| 18   | 8  | -0.13 | 0.10  | 0.08  | 0.13  | -0.12 | -0.02 | 0.01  | -0.02 | -0.01 |
| 19   | 8  | -0.18 | -0.12 | -0.01 | -0.12 | -0.03 | -0.02 | -0.05 | 0.03  | 0.04  |
| 20   | 1  | -0.37 | 0.17  | -0.09 | 0.16  | -0.40 | -0.24 | 0.38  | -0.56 | -0.16 |

|                |  |          |  |          |  |          |  |  |  |  |
|----------------|--|----------|--|----------|--|----------|--|--|--|--|
|                |  | 16       |  | 17       |  | 18       |  |  |  |  |
|                |  | A        |  | A        |  | A        |  |  |  |  |
| Frequencies -- |  | 485.5103 |  | 531.5817 |  | 571.8407 |  |  |  |  |
| Red. masses -- |  | 1.3870   |  | 4.1566   |  | 4.9356   |  |  |  |  |
| Frc consts --  |  | 0.1926   |  | 0.6920   |  | 0.9509   |  |  |  |  |
| IR Inten --    |  | 96.2767  |  | 0.9099   |  | 20.2317  |  |  |  |  |
| Raman Activ -- |  | 1.0209   |  | 0.1797   |  | 0.6298   |  |  |  |  |
| Depolar (P) -- |  | 0.4918   |  | 0.7500   |  | 0.7500   |  |  |  |  |
| Depolar (U) -- |  | 0.6593   |  | 0.8571   |  | 0.8571   |  |  |  |  |

|      |    |       |       |      |       |       |       |       |      |       |
|------|----|-------|-------|------|-------|-------|-------|-------|------|-------|
| Atom | AN | X     | Y     | Z    | X     | Y     | Z     | X     | Y    | Z     |
| 1    | 6  | 0.00  | -0.02 | 0.00 | 0.03  | 0.00  | -0.10 | -0.08 | 0.00 | -0.19 |
| 2    | 6  | -0.01 | -0.04 | 0.00 | -0.01 | -0.02 | 0.12  | -0.06 | 0.15 | -0.07 |
| 3    | 6  | 0.00  | -0.05 | 0.00 | 0.00  | -0.03 | 0.22  | -0.13 | 0.18 | 0.01  |
| 4    | 1  | 0.00  | -0.04 | 0.01 | -0.01 | -0.04 | 0.28  | -0.11 | 0.23 | 0.23  |
| 5    | 6  | 0.00  | -0.07 | 0.00 | 0.00  | 0.00  | -0.27 | -0.03 | 0.00 | -0.05 |
| 6    | 1  | 0.00  | -0.07 | 0.00 | -0.03 | 0.00  | -0.73 | 0.23  | 0.00 | 0.08  |

|    |   |       |       |       |       |       |       |       |       |       |
|----|---|-------|-------|-------|-------|-------|-------|-------|-------|-------|
| 7  | 6 | 0.00  | -0.05 | 0.00  | 0.00  | 0.03  | 0.22  | -0.13 | -0.18 | 0.01  |
| 8  | 8 | 0.02  | 0.05  | -0.03 | 0.08  | -0.05 | -0.05 | 0.00  | 0.07  | -0.01 |
| 9  | 1 | -0.41 | -0.55 | 0.10  | 0.06  | -0.03 | 0.11  | -0.27 | -0.34 | -0.02 |
| 10 | 8 | 0.00  | 0.03  | 0.01  | 0.00  | -0.04 | 0.04  | 0.07  | -0.15 | 0.04  |
| 11 | 6 | -0.04 | 0.03  | 0.00  | -0.04 | 0.02  | -0.06 | 0.02  | 0.07  | 0.08  |
| 12 | 8 | -0.01 | 0.03  | -0.02 | -0.08 | -0.01 | -0.04 | 0.08  | -0.02 | 0.01  |
| 13 | 6 | 0.01  | -0.04 | 0.00  | -0.01 | 0.02  | 0.12  | -0.06 | -0.15 | -0.07 |
| 14 | 6 | 0.00  | 0.02  | 0.00  | 0.07  | 0.00  | -0.06 | 0.11  | 0.00  | 0.04  |
| 15 | 6 | 0.04  | 0.03  | 0.00  | -0.04 | -0.02 | -0.06 | 0.02  | -0.07 | 0.08  |
| 16 | 8 | 0.00  | 0.03  | -0.01 | 0.00  | 0.04  | 0.04  | 0.07  | 0.15  | 0.04  |
| 17 | 1 | 0.00  | -0.04 | -0.01 | -0.01 | 0.04  | 0.28  | -0.11 | -0.23 | 0.23  |
| 18 | 8 | 0.01  | 0.03  | 0.02  | -0.08 | 0.01  | -0.04 | 0.08  | 0.02  | 0.01  |
| 19 | 8 | -0.02 | 0.05  | 0.03  | 0.08  | 0.05  | -0.05 | 0.00  | -0.07 | -0.01 |
| 20 | 1 | 0.41  | -0.55 | -0.10 | 0.06  | 0.03  | 0.11  | -0.27 | 0.34  | -0.02 |

|                |  |          |  |          |  |          |  |  |  |  |
|----------------|--|----------|--|----------|--|----------|--|--|--|--|
|                |  | 19       |  | 20       |  | 21       |  |  |  |  |
|                |  | A        |  | A        |  | A        |  |  |  |  |
| Frequencies -- |  | 647.0405 |  | 660.3370 |  | 684.1683 |  |  |  |  |
| Red. masses -- |  | 5.3789   |  | 4.3745   |  | 5.8317   |  |  |  |  |
| Frc consts --  |  | 1.3268   |  | 1.1239   |  | 1.6083   |  |  |  |  |
| IR Inten --    |  | 0.6527   |  | 141.1826 |  | 0.2017   |  |  |  |  |
| Raman Activ -- |  | 1.2128   |  | 0.8279   |  | 9.8004   |  |  |  |  |
| Depolar (P) -- |  | 0.5851   |  | 0.7500   |  | 0.0474   |  |  |  |  |
| Depolar (U) -- |  | 0.7382   |  | 0.8571   |  | 0.0905   |  |  |  |  |

| Atom | AN | X     | Y     | Z     | X     | Y     | Z     | X     | Y     | Z     |
|------|----|-------|-------|-------|-------|-------|-------|-------|-------|-------|
| 1    | 6  | 0.00  | 0.01  | 0.00  | 0.12  | 0.00  | 0.05  | 0.00  | 0.21  | 0.00  |
| 2    | 6  | -0.06 | -0.01 | 0.34  | 0.14  | 0.06  | 0.02  | -0.14 | 0.05  | -0.09 |
| 3    | 6  | -0.02 | -0.04 | -0.04 | -0.08 | 0.05  | 0.02  | -0.15 | 0.06  | 0.00  |
| 4    | 1  | 0.01  | 0.01  | -0.38 | -0.14 | -0.06 | -0.07 | -0.06 | 0.23  | 0.11  |
| 5    | 6  | 0.00  | -0.10 | 0.00  | -0.07 | 0.00  | -0.01 | 0.00  | -0.12 | 0.00  |
| 6    | 1  | 0.00  | -0.10 | 0.00  | 0.04  | 0.00  | -0.12 | 0.00  | -0.12 | 0.00  |
| 7    | 6  | 0.02  | -0.04 | 0.04  | -0.08 | -0.05 | 0.02  | 0.15  | 0.06  | 0.00  |
| 8    | 8  | -0.13 | 0.01  | 0.04  | -0.07 | -0.06 | -0.13 | -0.01 | -0.05 | -0.14 |
| 9    | 1  | 0.06  | 0.20  | -0.34 | 0.08  | 0.04  | -0.57 | 0.03  | -0.07 | -0.47 |
| 10   | 8  | 0.00  | 0.00  | -0.01 | -0.02 | 0.03  | 0.00  | -0.10 | -0.11 | -0.04 |
| 11   | 6  | -0.13 | 0.07  | -0.02 | 0.13  | 0.08  | -0.01 | -0.08 | -0.15 | -0.02 |
| 12   | 8  | -0.06 | -0.01 | -0.11 | -0.06 | -0.09 | 0.15  | 0.04  | 0.11  | -0.11 |
| 13   | 6  | 0.06  | -0.01 | -0.34 | 0.14  | -0.06 | 0.02  | 0.14  | 0.05  | 0.09  |
| 14   | 6  | 0.00  | 0.01  | 0.00  | -0.02 | 0.00  | -0.02 | 0.00  | 0.10  | 0.00  |
| 15   | 6  | 0.13  | 0.07  | 0.02  | 0.13  | -0.08 | -0.01 | 0.08  | -0.15 | 0.02  |
| 16   | 8  | 0.00  | 0.00  | 0.01  | -0.02 | -0.03 | 0.00  | 0.10  | -0.11 | 0.04  |
| 17   | 1  | -0.01 | 0.01  | 0.38  | -0.14 | 0.06  | -0.07 | 0.06  | 0.23  | -0.11 |
| 18   | 8  | 0.06  | -0.01 | 0.11  | -0.06 | 0.09  | 0.15  | -0.04 | 0.11  | 0.11  |
| 19   | 8  | 0.13  | 0.01  | -0.04 | -0.07 | 0.06  | -0.13 | 0.01  | -0.05 | 0.14  |
| 20   | 1  | -0.06 | 0.20  | 0.34  | 0.08  | -0.04 | -0.57 | -0.03 | -0.07 | 0.47  |

|                |  |          |  |          |  |          |  |  |  |  |
|----------------|--|----------|--|----------|--|----------|--|--|--|--|
|                |  | 22       |  | 23       |  | 24       |  |  |  |  |
|                |  | A        |  | A        |  | A        |  |  |  |  |
| Frequencies -- |  | 713.4706 |  | 755.3530 |  | 756.2336 |  |  |  |  |
| Red. masses -- |  | 3.2409   |  | 3.8886   |  | 5.7220   |  |  |  |  |
| Frc consts --  |  | 0.9720   |  | 1.3072   |  | 1.9280   |  |  |  |  |
| IR Inten --    |  | 17.7895  |  | 71.3189  |  | 38.6994  |  |  |  |  |
| Raman Activ -- |  | 0.1798   |  | 10.1870  |  | 17.9019  |  |  |  |  |
| Depolar (P) -- |  | 0.7500   |  | 0.7500   |  | 0.0177   |  |  |  |  |
| Depolar (U) -- |  | 0.8571   |  | 0.8571   |  | 0.0348   |  |  |  |  |

| Atom | AN | X     | Y     | Z     | X     | Y     | Z     | X    | Y     | Z     |
|------|----|-------|-------|-------|-------|-------|-------|------|-------|-------|
| 1    | 6  | -0.03 | 0.00  | 0.12  | 0.02  | 0.00  | 0.02  | 0.00 | -0.16 | 0.00  |
| 2    | 6  | 0.01  | -0.01 | -0.16 | 0.00  | -0.06 | 0.00  | 0.03 | -0.05 | -0.04 |
| 3    | 6  | 0.01  | 0.00  | 0.08  | 0.05  | -0.14 | -0.04 | 0.12 | 0.04  | 0.00  |
| 4    | 1  | 0.00  | 0.03  | 0.60  | 0.01  | -0.18 | 0.35  | 0.04 | -0.09 | 0.03  |
| 5    | 6  | 0.02  | 0.00  | -0.18 | -0.04 | 0.00  | -0.06 | 0.00 | 0.32  | 0.00  |
| 6    | 1  | 0.00  | 0.00  | 0.25  | -0.32 | 0.00  | 0.49  | 0.00 | 0.32  | 0.00  |



|    |   |       |       |       |       |       |       |       |       |       |
|----|---|-------|-------|-------|-------|-------|-------|-------|-------|-------|
| 7  | 6 | 0.01  | 0.00  | 0.08  | 0.05  | 0.14  | -0.04 | -0.12 | 0.04  | 0.00  |
| 8  | 8 | -0.03 | -0.01 | 0.02  | 0.05  | 0.03  | -0.06 | -0.01 | -0.08 | -0.14 |
| 9  | 1 | 0.03  | 0.07  | -0.05 | -0.08 | -0.17 | -0.12 | 0.04  | -0.08 | -0.49 |
| 10 | 8 | 0.02  | 0.02  | -0.07 | -0.01 | 0.00  | -0.01 | 0.13  | 0.07  | 0.06  |
| 11 | 6 | 0.05  | -0.07 | -0.03 | -0.09 | 0.24  | 0.12  | -0.13 | -0.07 | -0.02 |
| 12 | 8 | 0.01  | 0.02  | 0.03  | 0.03  | -0.07 | -0.02 | -0.02 | 0.05  | -0.13 |
| 13 | 6 | 0.01  | 0.01  | -0.16 | 0.00  | 0.06  | 0.00  | -0.03 | -0.05 | 0.04  |
| 14 | 6 | -0.12 | 0.00  | 0.21  | -0.04 | 0.00  | 0.02  | 0.00  | -0.15 | 0.00  |
| 15 | 6 | 0.05  | 0.07  | -0.03 | -0.09 | -0.24 | 0.12  | 0.13  | -0.07 | 0.02  |
| 16 | 8 | 0.02  | -0.02 | -0.07 | -0.01 | 0.00  | -0.01 | -0.13 | 0.07  | -0.06 |
| 17 | 1 | 0.00  | -0.03 | 0.60  | 0.01  | 0.18  | 0.35  | -0.04 | -0.09 | -0.03 |
| 18 | 8 | 0.01  | -0.02 | 0.03  | 0.03  | 0.07  | -0.02 | 0.02  | 0.05  | 0.13  |
| 19 | 8 | -0.03 | 0.01  | 0.02  | 0.05  | -0.03 | -0.06 | 0.01  | -0.08 | 0.14  |
| 20 | 1 | 0.03  | -0.07 | -0.05 | -0.08 | 0.17  | -0.12 | -0.04 | -0.09 | 0.49  |

| 25             |          |       |       | 26    |          |       |       | 27    |          |       |  |  |
|----------------|----------|-------|-------|-------|----------|-------|-------|-------|----------|-------|--|--|
| A              |          |       |       | A     |          |       |       | A     |          |       |  |  |
| Frequencies -- | 765.7123 |       |       |       | 802.9427 |       |       |       | 836.1162 |       |  |  |
| Red. masses -- | 7.4742   |       |       |       | 1.9307   |       |       |       | 9.2668   |       |  |  |
| Frc consts --  | 2.5819   |       |       |       | 0.7334   |       |       |       | 3.8169   |       |  |  |
| IR Inten --    | 33.4063  |       |       |       | 23.1462  |       |       |       | 60.2118  |       |  |  |
| Raman Activ -- | 5.0691   |       |       |       | 1.5225   |       |       |       | 6.4126   |       |  |  |
| Depolar (P) -- | 0.3316   |       |       |       | 0.7500   |       |       |       | 0.1392   |       |  |  |
| Depolar (U) -- | 0.4980   |       |       |       | 0.8571   |       |       |       | 0.2444   |       |  |  |
| Atom           | AN       | X     | Y     | Z     | X        | Y     | Z     | X     | Y        | Z     |  |  |
| 1              | 6        | 0.00  | -0.02 | 0.00  | 0.02     | 0.00  | 0.06  | 0.00  | -0.06    | 0.00  |  |  |
| 2              | 6        | -0.06 | 0.01  | -0.19 | 0.01     | 0.02  | 0.08  | 0.08  | -0.09    | -0.03 |  |  |
| 3              | 6        | -0.03 | -0.05 | -0.02 | -0.02    | 0.03  | -0.07 | 0.24  | -0.11    | 0.01  |  |  |
| 4              | 1        | 0.03  | 0.08  | 0.32  | -0.02    | 0.05  | 0.40  | 0.12  | -0.34    | 0.00  |  |  |
| 5              | 6        | 0.00  | -0.18 | 0.00  | 0.01     | 0.00  | -0.08 | 0.00  | 0.24     | 0.00  |  |  |
| 6              | 1        | 0.00  | -0.18 | 0.00  | 0.05     | 0.00  | 0.77  | 0.00  | 0.23     | 0.00  |  |  |
| 7              | 6        | 0.03  | -0.05 | 0.02  | -0.02    | -0.03 | -0.07 | -0.24 | -0.11    | -0.01 |  |  |
| 8              | 8        | -0.05 | -0.11 | -0.01 | 0.00     | -0.02 | 0.00  | -0.01 | -0.03    | -0.01 |  |  |
| 9              | 1        | 0.18  | 0.24  | 0.01  | 0.02     | 0.03  | 0.05  | 0.05  | 0.04     | -0.09 |  |  |
| 10             | 8        | 0.04  | 0.03  | 0.01  | -0.02    | 0.01  | 0.04  | -0.29 | -0.06    | -0.14 |  |  |
| 11             | 6        | -0.17 | 0.33  | 0.20  | 0.01     | -0.05 | -0.04 | -0.07 | 0.07     | 0.04  |  |  |
| 12             | 8        | 0.08  | -0.07 | -0.08 | -0.02    | 0.01  | 0.00  | -0.01 | -0.02    | -0.04 |  |  |
| 13             | 6        | 0.06  | 0.01  | 0.19  | 0.01     | -0.02 | 0.08  | -0.08 | -0.09    | 0.03  |  |  |
| 14             | 6        | 0.00  | -0.05 | 0.00  | 0.07     | 0.00  | -0.15 | 0.00  | 0.43     | 0.00  |  |  |
| 15             | 6        | 0.17  | 0.33  | -0.20 | 0.01     | 0.05  | -0.04 | 0.07  | 0.07     | -0.04 |  |  |
| 16             | 8        | -0.04 | 0.03  | -0.01 | -0.02    | -0.01 | 0.04  | 0.29  | -0.06    | 0.14  |  |  |
| 17             | 1        | -0.03 | 0.08  | -0.32 | -0.02    | -0.05 | 0.40  | -0.12 | -0.34    | 0.00  |  |  |
| 18             | 8        | -0.08 | -0.07 | 0.08  | -0.02    | -0.01 | 0.00  | 0.01  | -0.02    | 0.04  |  |  |
| 19             | 8        | 0.05  | -0.11 | 0.01  | 0.00     | 0.02  | 0.00  | 0.01  | -0.03    | 0.01  |  |  |
| 20             | 1        | -0.18 | 0.24  | -0.01 | 0.02     | -0.03 | 0.05  | -0.05 | 0.04     | 0.09  |  |  |

| 28             |          |       |      | 29    |          |       |       | 30   |          |       |  |  |
|----------------|----------|-------|------|-------|----------|-------|-------|------|----------|-------|--|--|
| A              |          |       |      | A     |          |       |       | A    |          |       |  |  |
| Frequencies -- | 856.5647 |       |      |       | 912.1283 |       |       |      | 934.3767 |       |  |  |
| Red. masses -- | 9.0805   |       |      |       | 6.6700   |       |       |      | 1.4255   |       |  |  |
| Frc consts --  | 3.9253   |       |      |       | 3.2696   |       |       |      | 0.7332   |       |  |  |
| IR Inten --    | 9.5871   |       |      |       | 4.7119   |       |       |      | 0.2116   |       |  |  |
| Raman Activ -- | 0.9087   |       |      |       | 0.6796   |       |       |      | 0.3289   |       |  |  |
| Depolar (P) -- | 0.7500   |       |      |       | 0.7500   |       |       |      | 0.6311   |       |  |  |
| Depolar (U) -- | 0.8571   |       |      |       | 0.8571   |       |       |      | 0.7738   |       |  |  |
| Atom           | AN       | X     | Y    | Z     | X        | Y     | Z     | X    | Y        | Z     |  |  |
| 1              | 6        | 0.00  | 0.00 | 0.44  | 0.33     | 0.00  | 0.02  | 0.00 | 0.00     | 0.00  |  |  |
| 2              | 6        | -0.02 | 0.00 | -0.31 | 0.26     | 0.06  | -0.02 | 0.00 | 0.00     | 0.05  |  |  |
| 3              | 6        | -0.01 | 0.01 | 0.13  | -0.09    | 0.11  | 0.01  | 0.02 | 0.00     | -0.12 |  |  |
| 4              | 1        | 0.00  | 0.03 | -0.10 | -0.19    | -0.07 | -0.04 | 0.01 | 0.03     | 0.69  |  |  |
| 5              | 6        | 0.01  | 0.00 | -0.03 | -0.03    | 0.00  | -0.02 | 0.00 | 0.01     | 0.00  |  |  |
| 6              | 1        | 0.05  | 0.00 | -0.49 | 0.36     | 0.00  | 0.09  | 0.00 | 0.01     | 0.00  |  |  |

|    |   |       |       |       |       |       |       |       |       |       |
|----|---|-------|-------|-------|-------|-------|-------|-------|-------|-------|
| 7  | 6 | -0.01 | -0.01 | 0.13  | -0.09 | -0.11 | 0.01  | -0.02 | 0.00  | 0.12  |
| 8  | 8 | -0.01 | 0.05  | 0.04  | -0.02 | 0.11  | 0.13  | 0.00  | 0.01  | 0.01  |
| 9  | 1 | -0.05 | -0.03 | -0.05 | -0.07 | 0.08  | 0.37  | -0.01 | 0.00  | -0.01 |
| 10 | 8 | -0.06 | 0.01  | 0.11  | -0.01 | 0.03  | -0.03 | 0.00  | 0.00  | 0.00  |
| 11 | 6 | -0.03 | 0.07  | 0.05  | -0.13 | 0.08  | -0.02 | 0.00  | -0.01 | -0.01 |
| 12 | 8 | 0.04  | 0.00  | -0.01 | -0.09 | 0.00  | -0.14 | -0.01 | 0.00  | 0.00  |
| 13 | 6 | -0.02 | 0.00  | -0.31 | 0.26  | -0.06 | -0.02 | 0.00  | 0.00  | -0.05 |
| 14 | 6 | 0.20  | 0.00  | -0.45 | -0.07 | 0.00  | 0.07  | 0.00  | 0.00  | 0.00  |
| 15 | 6 | -0.03 | -0.07 | 0.05  | -0.13 | -0.08 | -0.02 | 0.00  | -0.01 | 0.01  |
| 16 | 8 | -0.06 | -0.01 | 0.11  | -0.01 | -0.03 | -0.03 | 0.00  | 0.00  | 0.00  |
| 17 | 1 | 0.00  | -0.03 | -0.10 | -0.19 | 0.07  | -0.04 | -0.01 | 0.03  | -0.69 |
| 18 | 8 | 0.04  | 0.00  | -0.01 | -0.09 | 0.00  | -0.14 | 0.01  | 0.00  | 0.00  |
| 19 | 8 | -0.01 | -0.05 | 0.04  | -0.02 | -0.11 | 0.13  | 0.00  | 0.01  | -0.01 |
| 20 | 1 | -0.05 | 0.03  | -0.05 | -0.07 | -0.08 | 0.37  | 0.01  | 0.00  | 0.01  |

|                |   |          |       |       |           |       |       |           |       |       |
|----------------|---|----------|-------|-------|-----------|-------|-------|-----------|-------|-------|
|                |   | 31       |       |       | 32        |       |       | 33        |       |       |
|                |   | A        |       |       | A         |       |       | A         |       |       |
| Frequencies -- |   | 980.0617 |       |       | 1093.8620 |       |       | 1129.8806 |       |       |
| Red. masses -- |   | 1.3278   |       |       | 3.2547    |       |       | 9.2957    |       |       |
| Frc consts --  |   | 0.7514   |       |       | 2.2945    |       |       | 6.9920    |       |       |
| IR Inten --    |   | 1.2252   |       |       | 2.2527    |       |       | 59.2358   |       |       |
| Raman Activ -- |   | 0.0809   |       |       | 28.4781   |       |       | 1.6411    |       |       |
| Depolar (P) -- |   | 0.7500   |       |       | 0.0499    |       |       | 0.5155    |       |       |
| Depolar (U) -- |   | 0.8571   |       |       | 0.0951    |       |       | 0.6803    |       |       |
| Atom AN        |   | X        | Y     | Z     | X         | Y     | Z     | X         | Y     | Z     |
| 1              | 6 | -0.01    | 0.00  | -0.02 | 0.00      | 0.18  | 0.00  | 0.00      | -0.26 | 0.00  |
| 2              | 6 | -0.01    | 0.00  | -0.01 | -0.03     | 0.06  | 0.00  | 0.29      | 0.13  | 0.04  |
| 3              | 6 | 0.00     | 0.00  | 0.08  | 0.25      | -0.05 | 0.02  | -0.03     | 0.11  | -0.01 |
| 4              | 1 | 0.01     | -0.03 | -0.51 | 0.50      | 0.36  | -0.04 | 0.04      | 0.21  | 0.03  |
| 5              | 6 | 0.01     | 0.00  | -0.12 | 0.00      | -0.13 | 0.00  | 0.00      | -0.27 | 0.00  |
| 6              | 1 | -0.02    | 0.00  | 0.67  | 0.00      | -0.16 | 0.00  | 0.00      | -0.28 | 0.00  |
| 7              | 6 | 0.00     | 0.00  | 0.08  | -0.25     | -0.05 | -0.02 | 0.03      | 0.11  | 0.01  |
| 8              | 8 | 0.00     | 0.00  | 0.00  | 0.01      | -0.01 | -0.02 | 0.04      | -0.12 | -0.22 |
| 9              | 1 | 0.00     | 0.00  | -0.01 | 0.01      | 0.01  | 0.02  | 0.09      | 0.07  | 0.24  |
| 10             | 8 | 0.00     | 0.00  | 0.00  | 0.04      | -0.02 | 0.02  | -0.08     | 0.03  | -0.04 |
| 11             | 6 | 0.00     | 0.00  | 0.00  | 0.02      | -0.02 | -0.03 | 0.12      | 0.12  | -0.19 |
| 12             | 8 | 0.00     | 0.00  | 0.00  | 0.00      | 0.00  | 0.00  | -0.11     | 0.00  | -0.09 |
| 13             | 6 | -0.01    | 0.00  | -0.01 | 0.03      | 0.06  | 0.00  | -0.29     | 0.13  | -0.04 |
| 14             | 6 | 0.00     | 0.00  | 0.01  | 0.00      | -0.04 | 0.00  | 0.00      | 0.02  | 0.00  |
| 15             | 6 | 0.00     | 0.00  | 0.00  | -0.02     | -0.02 | 0.03  | -0.12     | 0.12  | 0.19  |
| 16             | 8 | 0.00     | 0.00  | 0.00  | -0.04     | -0.02 | -0.02 | 0.08      | 0.03  | 0.04  |
| 17             | 1 | 0.01     | 0.03  | -0.51 | -0.50     | 0.36  | 0.04  | -0.04     | 0.21  | -0.03 |
| 18             | 8 | 0.00     | 0.00  | 0.00  | 0.00      | 0.00  | 0.00  | 0.11      | 0.00  | 0.09  |
| 19             | 8 | 0.00     | 0.00  | 0.00  | -0.01     | -0.01 | 0.02  | -0.04     | -0.12 | 0.22  |
| 20             | 1 | 0.00     | 0.00  | -0.01 | -0.01     | 0.01  | -0.02 | -0.09     | 0.07  | -0.24 |

|                |   |           |       |       |           |       |       |           |       |       |
|----------------|---|-----------|-------|-------|-----------|-------|-------|-----------|-------|-------|
|                |   | 34        |       |       | 35        |       |       | 36        |       |       |
|                |   | A         |       |       | A         |       |       | A         |       |       |
| Frequencies -- |   | 1158.6981 |       |       | 1180.4602 |       |       | 1201.9547 |       |       |
| Red. masses -- |   | 1.8622    |       |       | 2.1585    |       |       | 1.6115    |       |       |
| Frc consts --  |   | 1.4730    |       |       | 1.7722    |       |       | 1.3717    |       |       |
| IR Inten --    |   | 197.7005  |       |       | 6.3102    |       |       | 247.7359  |       |       |
| Raman Activ -- |   | 5.4119    |       |       | 4.8932    |       |       | 0.4576    |       |       |
| Depolar (P) -- |   | 0.7500    |       |       | 0.3487    |       |       | 0.7500    |       |       |
| Depolar (U) -- |   | 0.8571    |       |       | 0.5171    |       |       | 0.8571    |       |       |
| Atom AN        |   | X         | Y     | Z     | X         | Y     | Z     | X         | Y     | Z     |
| 1              | 6 | 0.06      | 0.00  | 0.01  | 0.00      | 0.22  | 0.00  | -0.05     | 0.00  | -0.01 |
| 2              | 6 | -0.03     | -0.07 | -0.01 | 0.02      | 0.04  | 0.01  | -0.03     | 0.01  | 0.01  |
| 3              | 6 | -0.06     | -0.01 | 0.00  | 0.00      | -0.09 | -0.01 | -0.01     | -0.06 | 0.00  |
| 4              | 1 | -0.13     | -0.12 | -0.01 | -0.28     | -0.58 | 0.04  | -0.19     | -0.37 | 0.02  |
| 5              | 6 | 0.08      | 0.00  | 0.00  | 0.00      | 0.04  | 0.00  | 0.06      | 0.00  | 0.00  |
| 6              | 1 | 0.88      | 0.00  | 0.02  | 0.00      | 0.04  | 0.00  | 0.56      | 0.00  | 0.01  |

|    |   |       |       |       |       |       |       |       |       |       |
|----|---|-------|-------|-------|-------|-------|-------|-------|-------|-------|
| 7  | 6 | -0.06 | 0.01  | 0.00  | 0.00  | -0.09 | 0.01  | -0.01 | 0.06  | 0.00  |
| 8  | 8 | 0.01  | -0.04 | -0.09 | 0.00  | -0.03 | -0.06 | 0.01  | 0.03  | 0.08  |
| 9  | 1 | 0.03  | 0.06  | 0.20  | 0.02  | 0.06  | 0.19  | -0.02 | -0.12 | -0.36 |
| 10 | 8 | 0.00  | 0.01  | -0.01 | 0.04  | -0.02 | 0.02  | 0.00  | 0.00  | 0.00  |
| 11 | 6 | -0.06 | -0.04 | 0.08  | 0.03  | 0.04  | -0.04 | 0.05  | 0.03  | -0.06 |
| 12 | 8 | 0.03  | 0.00  | 0.03  | -0.03 | 0.00  | -0.02 | -0.02 | 0.00  | -0.02 |
| 13 | 6 | -0.03 | 0.07  | -0.01 | -0.02 | 0.04  | -0.01 | -0.03 | -0.01 | 0.01  |
| 14 | 6 | -0.01 | 0.00  | 0.01  | 0.00  | -0.03 | 0.00  | 0.01  | 0.00  | 0.00  |
| 15 | 6 | -0.06 | 0.04  | 0.08  | -0.03 | 0.04  | 0.04  | 0.05  | -0.03 | -0.06 |
| 16 | 8 | 0.00  | -0.01 | -0.01 | -0.04 | -0.02 | -0.02 | 0.00  | 0.00  | 0.00  |
| 17 | 1 | -0.13 | 0.12  | -0.01 | 0.28  | -0.58 | -0.04 | -0.19 | 0.37  | 0.02  |
| 18 | 8 | 0.03  | 0.00  | 0.03  | 0.03  | 0.00  | 0.02  | -0.02 | 0.00  | -0.02 |
| 19 | 8 | 0.01  | 0.04  | -0.09 | 0.00  | -0.03 | 0.06  | 0.01  | -0.03 | 0.08  |
| 20 | 1 | 0.03  | -0.06 | 0.20  | -0.02 | 0.06  | -0.19 | -0.02 | 0.12  | -0.36 |

37

38

39

A

A

A

|                |           |           |           |
|----------------|-----------|-----------|-----------|
| Frequencies -- | 1249.9782 | 1254.6831 | 1329.5143 |
| Red. masses -- | 1.7376    | 1.5981    | 6.4143    |
| Frc consts --  | 1.5996    | 1.4823    | 6.6802    |
| IR Inten --    | 45.3489   | 71.9387   | 1.0246    |
| Raman Activ -- | 14.6617   | 1.6171    | 0.1776    |
| Depolar (P) -- | 0.1223    | 0.7500    | 0.7500    |
| Depolar (U) -- | 0.2180    | 0.8571    | 0.8571    |

| Atom | AN | X     | Y     | Z     | X     | Y     | Z     | X     | Y     | Z     |
|------|----|-------|-------|-------|-------|-------|-------|-------|-------|-------|
| 1    | 6  | 0.00  | 0.03  | 0.00  | 0.06  | 0.00  | 0.00  | 0.36  | 0.00  | 0.00  |
| 2    | 6  | 0.12  | 0.07  | -0.01 | -0.02 | -0.13 | 0.01  | -0.16 | 0.23  | 0.00  |
| 3    | 6  | 0.01  | 0.00  | 0.00  | -0.04 | 0.03  | 0.00  | -0.14 | -0.21 | 0.00  |
| 4    | 1  | -0.10 | -0.21 | 0.01  | 0.22  | 0.50  | -0.01 | 0.17  | 0.35  | -0.02 |
| 5    | 6  | 0.00  | -0.07 | 0.00  | -0.02 | 0.00  | 0.00  | 0.25  | 0.00  | 0.01  |
| 6    | 1  | 0.00  | -0.08 | 0.00  | 0.21  | 0.00  | 0.02  | -0.38 | 0.00  | -0.02 |
| 7    | 6  | -0.01 | 0.00  | 0.00  | -0.04 | -0.03 | 0.00  | -0.14 | 0.21  | 0.00  |
| 8    | 8  | 0.03  | 0.00  | 0.07  | 0.03  | 0.00  | 0.04  | 0.01  | -0.01 | 0.00  |
| 9    | 1  | 0.00  | -0.20 | -0.61 | 0.01  | -0.12 | -0.38 | -0.01 | -0.07 | -0.16 |
| 10   | 8  | 0.00  | 0.00  | 0.00  | 0.00  | 0.00  | 0.00  | -0.01 | 0.02  | -0.01 |
| 11   | 6  | -0.02 | 0.00  | 0.02  | 0.00  | 0.02  | 0.00  | -0.01 | -0.05 | 0.02  |
| 12   | 8  | 0.01  | -0.01 | 0.02  | -0.01 | 0.00  | -0.02 | 0.01  | 0.01  | 0.00  |
| 13   | 6  | -0.12 | 0.07  | 0.01  | -0.02 | 0.13  | 0.01  | -0.16 | -0.23 | 0.00  |
| 14   | 6  | 0.00  | -0.01 | 0.00  | -0.01 | 0.00  | 0.01  | 0.00  | 0.00  | 0.02  |
| 15   | 6  | 0.02  | 0.00  | -0.02 | 0.00  | -0.02 | 0.00  | -0.01 | 0.05  | 0.02  |
| 16   | 8  | 0.00  | 0.00  | 0.00  | 0.00  | 0.00  | 0.00  | -0.01 | -0.02 | -0.01 |
| 17   | 1  | 0.10  | -0.21 | -0.01 | 0.22  | -0.50 | -0.01 | 0.17  | -0.35 | -0.02 |
| 18   | 8  | -0.01 | -0.01 | -0.02 | -0.01 | 0.00  | -0.02 | 0.01  | -0.01 | 0.00  |
| 19   | 8  | -0.03 | 0.00  | -0.07 | 0.03  | 0.00  | 0.04  | 0.01  | 0.01  | 0.00  |
| 20   | 1  | 0.00  | -0.20 | 0.61  | 0.01  | 0.12  | -0.38 | -0.01 | 0.07  | -0.16 |

40

41

42

A

A

A

|                |           |           |           |
|----------------|-----------|-----------|-----------|
| Frequencies -- | 1376.2439 | 1379.5972 | 1407.9687 |
| Red. masses -- | 2.2125    | 9.7059    | 3.6549    |
| Frc consts --  | 2.4690    | 10.8840   | 4.2689    |
| IR Inten --    | 99.8047   | 169.3887  | 198.6204  |
| Raman Activ -- | 1.7676    | 15.0445   | 15.1656   |
| Depolar (P) -- | 0.7500    | 0.1311    | 0.0622    |
| Depolar (U) -- | 0.8571    | 0.2318    | 0.1172    |

| Atom | AN | X     | Y     | Z     | X     | Y     | Z    | X     | Y     | Z     |
|------|----|-------|-------|-------|-------|-------|------|-------|-------|-------|
| 1    | 6  | -0.01 | 0.00  | 0.00  | 0.00  | -0.11 | 0.00 | 0.00  | -0.01 | 0.00  |
| 2    | 6  | -0.03 | -0.02 | 0.01  | 0.11  | 0.04  | 0.00 | 0.08  | 0.09  | -0.01 |
| 3    | 6  | -0.03 | -0.06 | 0.00  | 0.01  | 0.06  | 0.00 | 0.05  | 0.04  | 0.00  |
| 4    | 1  | 0.15  | 0.26  | -0.01 | -0.05 | -0.06 | 0.01 | -0.11 | -0.26 | 0.01  |
| 5    | 6  | -0.01 | 0.00  | 0.00  | 0.00  | -0.08 | 0.00 | 0.00  | -0.09 | 0.00  |
| 6    | 1  | 0.30  | 0.00  | 0.01  | 0.00  | -0.08 | 0.00 | 0.00  | -0.10 | 0.00  |

|    |   |       |       |       |       |       |       |       |       |       |
|----|---|-------|-------|-------|-------|-------|-------|-------|-------|-------|
| 7  | 6 | -0.03 | 0.06  | 0.00  | -0.01 | 0.06  | 0.00  | -0.05 | 0.04  | 0.00  |
| 8  | 8 | -0.05 | 0.04  | 0.01  | -0.03 | 0.02  | 0.01  | -0.05 | 0.05  | 0.02  |
| 9  | 1 | -0.03 | 0.17  | 0.53  | 0.00  | 0.14  | 0.35  | -0.04 | 0.16  | 0.52  |
| 10 | 8 | 0.00  | 0.00  | 0.00  | 0.28  | -0.19 | 0.14  | -0.07 | 0.05  | -0.03 |
| 11 | 6 | 0.10  | 0.12  | -0.12 | -0.08 | -0.09 | 0.09  | -0.12 | -0.16 | 0.15  |
| 12 | 8 | 0.01  | -0.02 | 0.04  | -0.01 | 0.01  | -0.04 | -0.02 | 0.03  | -0.05 |
| 13 | 6 | -0.03 | 0.02  | 0.01  | -0.11 | 0.04  | 0.00  | -0.08 | 0.09  | 0.01  |
| 14 | 6 | -0.01 | 0.00  | -0.01 | 0.00  | 0.57  | 0.00  | 0.00  | -0.14 | 0.00  |
| 15 | 6 | 0.10  | -0.12 | -0.12 | 0.08  | -0.09 | -0.09 | 0.12  | -0.16 | -0.15 |
| 16 | 8 | 0.00  | 0.00  | 0.00  | -0.28 | -0.19 | -0.14 | 0.07  | 0.05  | 0.03  |
| 17 | 1 | 0.15  | -0.26 | -0.01 | 0.05  | -0.06 | -0.01 | 0.11  | -0.26 | -0.01 |
| 18 | 8 | 0.01  | 0.02  | 0.04  | 0.01  | 0.01  | 0.04  | 0.02  | 0.03  | 0.05  |
| 19 | 8 | -0.05 | -0.04 | 0.01  | 0.03  | 0.02  | -0.01 | 0.05  | 0.05  | -0.02 |
| 20 | 1 | -0.03 | -0.17 | 0.53  | 0.00  | 0.14  | -0.35 | 0.04  | 0.16  | -0.52 |

43

44

45

A

A

A

|                |           |           |           |
|----------------|-----------|-----------|-----------|
| Frequencies -- | 1478.0701 | 1503.5741 | 1655.1204 |
| Red. masses -- | 3.8986    | 2.7869    | 7.8144    |
| Frc consts --  | 5.0182    | 3.7121    | 12.6126   |
| IR Inten --    | 1.0955    | 19.4600   | 14.5200   |
| Raman Activ -- | 1.8337    | 0.0011    | 11.7233   |
| Depolar (P) -- | 0.3600    | 0.7500    | 0.7500    |
| Depolar (U) -- | 0.5294    | 0.8571    | 0.8571    |

| Atom | AN | X     | Y     | Z     | X     | Y     | Z     | X     | Y     | Z     |
|------|----|-------|-------|-------|-------|-------|-------|-------|-------|-------|
| 1    | 6  | 0.00  | 0.24  | 0.00  | 0.11  | 0.00  | 0.00  | -0.38 | 0.00  | -0.01 |
| 2    | 6  | 0.23  | -0.15 | 0.01  | -0.09 | -0.13 | 0.01  | 0.27  | -0.06 | 0.00  |
| 3    | 6  | -0.11 | -0.05 | 0.00  | -0.04 | 0.13  | 0.00  | -0.24 | -0.12 | -0.01 |
| 4    | 1  | 0.22  | 0.55  | -0.01 | -0.31 | -0.30 | 0.00  | -0.01 | 0.32  | -0.01 |
| 5    | 6  | 0.00  | 0.09  | 0.00  | 0.21  | 0.00  | 0.01  | 0.41  | 0.00  | 0.01  |
| 6    | 1  | 0.00  | 0.12  | 0.00  | -0.67 | 0.00  | -0.02 | -0.43 | 0.00  | -0.02 |
| 7    | 6  | 0.11  | -0.05 | 0.00  | -0.04 | -0.13 | 0.00  | -0.24 | 0.12  | -0.01 |
| 8    | 8  | -0.01 | 0.01  | 0.01  | -0.01 | 0.01  | 0.01  | 0.00  | 0.00  | -0.01 |
| 9    | 1  | -0.02 | 0.01  | 0.08  | 0.00  | 0.03  | 0.09  | 0.01  | 0.01  | -0.02 |
| 10   | 8  | 0.00  | 0.00  | 0.00  | -0.01 | 0.01  | 0.00  | 0.03  | -0.03 | 0.02  |
| 11   | 6  | -0.04 | 0.00  | 0.05  | 0.04  | 0.05  | -0.04 | -0.01 | -0.01 | 0.05  |
| 12   | 8  | -0.02 | 0.00  | -0.03 | 0.01  | -0.01 | 0.02  | -0.02 | 0.00  | -0.03 |
| 13   | 6  | -0.23 | -0.15 | -0.01 | -0.09 | 0.13  | 0.01  | 0.27  | 0.06  | 0.00  |
| 14   | 6  | 0.00  | -0.03 | 0.00  | 0.00  | 0.00  | 0.01  | -0.06 | 0.00  | -0.05 |
| 15   | 6  | 0.04  | 0.00  | -0.05 | 0.04  | -0.05 | -0.04 | -0.01 | 0.01  | 0.05  |
| 16   | 8  | 0.00  | 0.00  | 0.00  | -0.01 | -0.01 | 0.00  | 0.03  | 0.03  | 0.02  |
| 17   | 1  | -0.22 | 0.55  | 0.01  | -0.31 | 0.30  | 0.00  | -0.01 | -0.31 | -0.01 |
| 18   | 8  | 0.02  | 0.00  | 0.03  | 0.01  | 0.01  | 0.02  | -0.02 | 0.00  | -0.03 |
| 19   | 8  | 0.01  | 0.01  | -0.01 | -0.01 | -0.01 | 0.01  | 0.00  | 0.00  | -0.01 |
| 20   | 1  | 0.02  | 0.01  | -0.08 | 0.00  | -0.03 | 0.09  | 0.01  | -0.01 | -0.02 |

46

47

48

A

A

A

|                |           |           |           |
|----------------|-----------|-----------|-----------|
| Frequencies -- | 1659.3615 | 1746.9636 | 1826.4354 |
| Red. masses -- | 6.1093    | 12.7077   | 10.3134   |
| Frc consts --  | 9.9111    | 22.8499   | 20.2703   |
| IR Inten --    | 2.9921    | 625.9244  | 833.2033  |
| Raman Activ -- | 24.8404   | 5.7289    | 0.0626    |
| Depolar (P) -- | 0.6920    | 0.7500    | 0.7497    |
| Depolar (U) -- | 0.8180    | 0.8571    | 0.8569    |

| Atom | AN | X     | Y     | Z    | X     | Y     | Z     | X     | Y     | Z     |
|------|----|-------|-------|------|-------|-------|-------|-------|-------|-------|
| 1    | 6  | 0.00  | 0.15  | 0.00 | -0.10 | 0.00  | -0.01 | 0.02  | 0.00  | 0.00  |
| 2    | 6  | 0.00  | -0.29 | 0.01 | 0.05  | 0.00  | 0.00  | -0.07 | -0.02 | -0.01 |
| 3    | 6  | 0.12  | 0.32  | 0.00 | -0.03 | -0.02 | 0.00  | 0.01  | 0.00  | 0.00  |
| 4    | 1  | -0.29 | -0.40 | 0.00 | 0.01  | 0.06  | 0.00  | 0.02  | -0.01 | -0.01 |
| 5    | 6  | 0.00  | -0.17 | 0.00 | 0.04  | 0.00  | 0.00  | -0.01 | 0.00  | 0.00  |
| 6    | 1  | 0.00  | -0.20 | 0.00 | -0.04 | 0.00  | 0.00  | 0.04  | 0.00  | 0.01  |



|    |   |       |       |      |       |       |       |       |       |       |
|----|---|-------|-------|------|-------|-------|-------|-------|-------|-------|
| 7  | 6 | -0.04 | -0.02 | 0.00 | 0.00  | 0.00  | 0.00  | 0.00  | 0.00  | 0.00  |
| 8  | 8 | 0.00  | 0.00  | 0.00 | 0.04  | -0.02 | 0.01  | -0.03 | 0.02  | -0.01 |
| 9  | 1 | 0.00  | 0.00  | 0.00 | -0.59 | 0.40  | -0.09 | 0.57  | -0.39 | 0.09  |
| 10 | 8 | 0.00  | 0.00  | 0.00 | 0.00  | 0.00  | 0.00  | 0.00  | 0.00  | 0.00  |
| 11 | 6 | 0.00  | 0.00  | 0.00 | 0.00  | 0.00  | 0.00  | 0.00  | 0.00  | 0.00  |
| 12 | 8 | 0.00  | 0.00  | 0.00 | 0.00  | 0.00  | 0.00  | 0.00  | 0.00  | 0.00  |
| 13 | 6 | 0.00  | 0.00  | 0.00 | 0.00  | 0.00  | 0.00  | 0.00  | 0.00  | 0.00  |
| 14 | 6 | 0.00  | 0.00  | 0.00 | 0.00  | 0.00  | 0.00  | 0.00  | 0.00  | 0.00  |
| 15 | 6 | 0.00  | 0.00  | 0.00 | 0.00  | 0.00  | 0.00  | 0.00  | 0.00  | 0.00  |
| 16 | 8 | 0.00  | 0.00  | 0.00 | 0.00  | 0.00  | 0.00  | 0.00  | 0.00  | 0.00  |
| 17 | 1 | 0.43  | 0.24  | 0.02 | 0.00  | 0.00  | 0.00  | 0.00  | 0.00  | 0.00  |
| 18 | 8 | 0.00  | 0.00  | 0.00 | 0.00  | 0.00  | 0.00  | 0.00  | 0.00  | 0.00  |
| 19 | 8 | 0.00  | 0.00  | 0.00 | 0.03  | 0.02  | 0.01  | 0.04  | 0.02  | 0.01  |
| 20 | 1 | 0.00  | 0.00  | 0.00 | -0.57 | -0.39 | -0.09 | -0.59 | -0.40 | -0.09 |

## HEM-xH2O

Harmonic frequencies (cm<sup>-1</sup>), IR intensities (KM/Mole), Raman scattering activities (A<sup>4</sup>/AMU), depolarization ratios for plane and unpolarized incident light, reduced masses (AMU), force constants (mDyne/A), and normal coordinates:

|                |    | 1       |       |       | 2        |       |       | 3        |       |       |
|----------------|----|---------|-------|-------|----------|-------|-------|----------|-------|-------|
|                |    | A       |       |       | A        |       |       | A        |       |       |
| Frequencies -- |    | 23.3572 |       |       | 44.0834  |       |       | 55.0620  |       |       |
| Red. masses -- |    | 11.7221 |       |       | 6.2124   |       |       | 9.8660   |       |       |
| Frc consts --  |    | 0.0038  |       |       | 0.0071   |       |       | 0.0176   |       |       |
| IR Inten --    |    | 0.1256  |       |       | 6.4946   |       |       | 0.9012   |       |       |
| Raman Activ -- |    | 0.4832  |       |       | 0.4008   |       |       | 0.8601   |       |       |
| Depolar (P) -- |    | 0.6074  |       |       | 0.6776   |       |       | 0.7480   |       |       |
| Depolar (U) -- |    | 0.7557  |       |       | 0.8078   |       |       | 0.8558   |       |       |
| Atom           | AN | X       | Y     | Z     | X        | Y     | Z     | X        | Y     | Z     |
| 1              | 6  | -0.01   | 0.02  | 0.06  | 0.01     | -0.04 | 0.04  | 0.01     | 0.03  | -0.03 |
| 2              | 6  | 0.01    | 0.01  | 0.04  | -0.01    | -0.03 | 0.05  | 0.02     | 0.02  | -0.04 |
| 3              | 6  | -0.02   | 0.01  | 0.03  | 0.03     | -0.03 | -0.03 | -0.01    | 0.02  | -0.16 |
| 4              | 6  | 0.00    | 0.04  | 0.06  | 0.01     | -0.04 | 0.07  | 0.01     | 0.06  | 0.15  |
| 5              | 6  | 0.00    | 0.00  | -0.01 | -0.01    | 0.00  | -0.01 | 0.02     | 0.01  | -0.07 |
| 6              | 6  | 0.03    | 0.02  | 0.08  | -0.06    | -0.05 | 0.12  | -0.01    | 0.01  | -0.08 |
| 7              | 6  | -0.02   | 0.01  | -0.01 | 0.03     | 0.00  | -0.09 | -0.01    | 0.01  | -0.27 |
| 8              | 1  | -0.02   | 0.02  | 0.04  | 0.04     | -0.04 | -0.04 | -0.01    | 0.03  | -0.17 |
| 9              | 8  | -0.01   | 0.17  | 0.14  | 0.01     | -0.02 | 0.08  | 0.11     | 0.23  | 0.37  |
| 10             | 8  | 0.00    | -0.12 | -0.08 | 0.02     | -0.05 | 0.05  | -0.11    | -0.13 | 0.05  |
| 11             | 6  | -0.01   | 0.00  | -0.03 | 0.01     | 0.01  | -0.09 | 0.00     | 0.00  | -0.19 |
| 12             | 6  | 0.00    | 0.01  | -0.06 | -0.03    | 0.02  | -0.02 | 0.05     | -0.03 | 0.11  |
| 13             | 8  | 0.28    | 0.14  | 0.30  | -0.17    | -0.02 | 0.10  | 0.01     | -0.01 | -0.09 |
| 14             | 8  | -0.19   | -0.10 | -0.13 | -0.02    | -0.11 | 0.17  | -0.07    | -0.01 | -0.14 |
| 15             | 1  | -0.03   | 0.00  | -0.03 | 0.05     | 0.01  | -0.15 | -0.02    | 0.01  | -0.38 |
| 16             | 1  | -0.02   | -0.11 | -0.16 | 0.04     | 0.01  | 0.03  | -0.08    | -0.09 | 0.06  |
| 17             | 1  | -0.01   | -0.02 | -0.08 | 0.01     | 0.03  | -0.14 | 0.00     | 0.00  | -0.22 |
| 18             | 8  | -0.18   | 0.14  | -0.31 | -0.04    | 0.04  | -0.03 | 0.20     | -0.07 | 0.32  |
| 19             | 8  | 0.26    | -0.18 | 0.21  | -0.05    | 0.02  | -0.03 | -0.10    | -0.02 | 0.05  |
| 20             | 1  | 0.19    | -0.14 | 0.18  | -0.07    | 0.03  | -0.04 | -0.02    | -0.06 | 0.19  |
| 21             | 8  | -0.14   | -0.12 | -0.23 | 0.22     | 0.24  | -0.32 | -0.09    | -0.08 | -0.08 |
| 22             | 1  | -0.15   | -0.09 | -0.21 | 0.08     | 0.14  | -0.09 | -0.07    | -0.03 | -0.11 |
| 23             | 1  | -0.17   | -0.07 | -0.19 | 0.59     | -0.02 | -0.44 | -0.14    | -0.12 | -0.13 |
|                |    | 4       |       |       | 5        |       |       | 6        |       |       |
|                |    | A       |       |       | A        |       |       | A        |       |       |
| Frequencies -- |    | 81.0612 |       |       | 111.9226 |       |       | 135.3788 |       |       |
| Red. masses -- |    | 10.2675 |       |       | 9.0248   |       |       | 8.3322   |       |       |
| Frc consts --  |    | 0.0398  |       |       | 0.0666   |       |       | 0.0900   |       |       |
| IR Inten --    |    | 3.3734  |       |       | 1.2731   |       |       | 5.5422   |       |       |

|                |        |        |        |
|----------------|--------|--------|--------|
| Raman Activ -- | 0.3214 | 1.3653 | 1.5253 |
| Depolar (P) -- | 0.7324 | 0.5759 | 0.7500 |
| Depolar (U) -- | 0.8455 | 0.7309 | 0.8571 |

| Atom | AN | X     | Y     | Z     | X     | Y     | Z     | X     | Y     | Z     |
|------|----|-------|-------|-------|-------|-------|-------|-------|-------|-------|
| 1    | 6  | 0.01  | 0.06  | 0.02  | 0.00  | -0.04 | -0.04 | -0.03 | 0.03  | 0.20  |
| 2    | 6  | 0.03  | 0.05  | 0.05  | 0.03  | -0.06 | -0.04 | -0.04 | 0.03  | 0.23  |
| 3    | 6  | -0.02 | 0.05  | 0.02  | -0.01 | -0.04 | 0.00  | -0.04 | 0.03  | -0.01 |
| 4    | 6  | 0.01  | 0.09  | -0.06 | 0.01  | 0.12  | -0.06 | -0.03 | -0.02 | 0.05  |
| 5    | 6  | 0.03  | 0.03  | 0.02  | 0.02  | -0.06 | 0.00  | -0.04 | 0.02  | 0.08  |
| 6    | 6  | -0.08 | 0.01  | 0.15  | 0.03  | -0.07 | -0.01 | 0.04  | 0.07  | 0.11  |
| 7    | 6  | -0.02 | 0.02  | 0.05  | -0.01 | -0.05 | 0.04  | -0.05 | 0.02  | -0.21 |
| 8    | 1  | -0.04 | 0.07  | 0.01  | -0.01 | -0.04 | -0.01 | -0.04 | 0.03  | -0.07 |
| 9    | 8  | -0.05 | 0.19  | -0.05 | -0.06 | 0.40  | 0.08  | -0.14 | -0.06 | -0.07 |
| 10   | 8  | 0.08  | -0.01 | -0.18 | 0.11  | -0.01 | -0.20 | 0.12  | 0.02  | 0.03  |
| 11   | 6  | -0.01 | 0.00  | 0.03  | 0.01  | -0.06 | 0.04  | -0.05 | 0.03  | -0.16 |
| 12   | 6  | 0.11  | -0.04 | -0.06 | -0.09 | 0.03  | 0.00  | -0.02 | 0.00  | 0.02  |
| 13   | 8  | -0.18 | 0.14  | 0.23  | -0.11 | -0.09 | -0.09 | 0.06  | -0.13 | -0.06 |
| 14   | 8  | -0.12 | -0.20 | 0.15  | 0.15  | -0.06 | 0.11  | 0.10  | 0.34  | 0.13  |
| 15   | 1  | -0.04 | 0.01  | 0.06  | -0.02 | -0.05 | 0.08  | -0.05 | 0.03  | -0.44 |
| 16   | 1  | 0.06  | 0.01  | -0.25 | 0.20  | 0.16  | -0.23 | 0.11  | 0.07  | -0.06 |
| 17   | 1  | -0.01 | -0.01 | 0.02  | 0.01  | -0.08 | 0.08  | -0.06 | 0.04  | -0.35 |
| 18   | 8  | 0.20  | -0.28 | 0.03  | -0.15 | 0.21  | -0.05 | -0.04 | -0.05 | -0.02 |
| 19   | 8  | 0.10  | 0.18  | -0.29 | -0.18 | -0.07 | 0.07  | 0.04  | 0.05  | 0.00  |
| 20   | 1  | 0.22  | 0.08  | -0.37 | -0.33 | 0.04  | 0.06  | 0.07  | 0.02  | -0.06 |
| 21   | 8  | -0.07 | -0.22 | -0.01 | 0.21  | -0.19 | 0.10  | 0.05  | -0.31 | -0.15 |
| 22   | 1  | -0.12 | -0.22 | 0.08  | 0.19  | -0.19 | 0.15  | 0.01  | -0.08 | -0.07 |
| 23   | 1  | -0.04 | -0.06 | 0.12  | 0.18  | 0.02  | 0.26  | -0.04 | -0.26 | -0.13 |

7  
A

8  
A

9  
A

|                |          |          |          |
|----------------|----------|----------|----------|
| Frequencies -- | 158.1831 | 164.1456 | 169.2964 |
| Red. masses -- | 5.5672   | 7.6690   | 7.4004   |
| Frc consts --  | 0.0821   | 0.1217   | 0.1250   |
| IR Inten --    | 3.9327   | 5.6761   | 2.8746   |
| Raman Activ -- | 1.4863   | 2.6172   | 1.0911   |
| Depolar (P) -- | 0.7467   | 0.7500   | 0.6908   |
| Depolar (U) -- | 0.8550   | 0.8571   | 0.8171   |

| Atom | AN | X     | Y     | Z     | X     | Y     | Z     | X     | Y     | Z     |
|------|----|-------|-------|-------|-------|-------|-------|-------|-------|-------|
| 1    | 6  | 0.02  | -0.06 | -0.04 | -0.01 | -0.02 | 0.09  | 0.06  | -0.04 | 0.19  |
| 2    | 6  | 0.02  | -0.07 | 0.14  | 0.01  | -0.03 | -0.05 | 0.05  | -0.04 | 0.12  |
| 3    | 6  | 0.02  | -0.05 | -0.23 | -0.02 | -0.02 | 0.19  | 0.06  | -0.04 | 0.16  |
| 4    | 6  | 0.02  | 0.00  | -0.01 | -0.01 | -0.02 | 0.04  | 0.07  | 0.06  | 0.05  |
| 5    | 6  | 0.02  | -0.05 | 0.22  | 0.00  | -0.04 | -0.16 | 0.06  | -0.02 | -0.04 |
| 6    | 6  | 0.05  | -0.06 | 0.06  | 0.11  | 0.02  | 0.03  | -0.06 | -0.09 | 0.00  |
| 7    | 6  | 0.03  | -0.04 | -0.11 | -0.02 | -0.04 | 0.03  | 0.06  | -0.02 | -0.06 |
| 8    | 1  | 0.03  | -0.07 | -0.45 | -0.02 | -0.02 | 0.34  | 0.07  | -0.04 | 0.22  |
| 9    | 8  | 0.02  | 0.07  | 0.04  | -0.07 | -0.05 | -0.04 | -0.11 | 0.09  | -0.09 |
| 10   | 8  | 0.02  | 0.01  | 0.00  | 0.06  | 0.01  | 0.02  | 0.28  | 0.12  | 0.00  |
| 11   | 6  | 0.04  | -0.04 | 0.15  | -0.01 | -0.04 | -0.17 | 0.05  | -0.02 | -0.18 |
| 12   | 6  | -0.05 | 0.02  | 0.04  | -0.08 | 0.01  | -0.08 | 0.04  | -0.01 | -0.01 |
| 13   | 8  | 0.17  | -0.12 | 0.05  | 0.30  | 0.13  | 0.21  | -0.11 | -0.17 | -0.09 |
| 14   | 8  | -0.04 | 0.00  | -0.05 | 0.02  | -0.03 | -0.05 | -0.12 | -0.08 | -0.06 |
| 15   | 1  | 0.04  | -0.03 | -0.24 | -0.04 | -0.04 | 0.07  | 0.06  | -0.02 | -0.15 |
| 16   | 1  | -0.01 | -0.04 | -0.01 | 0.06  | 0.03  | -0.02 | 0.11  | -0.07 | -0.17 |
| 17   | 1  | 0.04  | -0.04 | 0.22  | -0.01 | -0.05 | -0.28 | 0.05  | -0.01 | -0.37 |
| 18   | 8  | -0.11 | -0.03 | -0.06 | 0.05  | 0.07  | 0.11  | 0.04  | 0.06  | 0.00  |
| 19   | 8  | -0.08 | 0.19  | -0.14 | -0.35 | 0.01  | -0.19 | 0.00  | -0.07 | 0.04  |
| 20   | 1  | -0.22 | 0.26  | -0.40 | -0.50 | 0.13  | -0.16 | 0.00  | -0.06 | 0.10  |
| 21   | 8  | -0.09 | 0.11  | 0.04  | 0.05  | -0.02 | 0.01  | -0.26 | 0.18  | 0.05  |
| 22   | 1  | -0.06 | 0.07  | -0.03 | 0.08  | -0.01 | -0.03 | -0.23 | 0.09  | -0.03 |
| 23   | 1  | -0.13 | 0.13  | 0.05  | -0.04 | 0.08  | 0.06  | -0.30 | 0.29  | 0.12  |

|                | 10                | 11                | 12                |          |
|----------------|-------------------|-------------------|-------------------|----------|
|                | A                 | A                 | A                 |          |
| Frequencies -- | 218.7295          |                   | 235.3750          | 273.1174 |
| Red. masses -- | 5.9932            |                   | 6.2415            | 5.9586   |
| Frc consts --  | 0.1689            |                   | 0.2037            | 0.2619   |
| IR Inten --    | 11.3615           |                   | 37.2179           | 0.3104   |
| Raman Activ -- | 1.0542            |                   | 0.8971            | 0.4350   |
| Depolar (P) -- | 0.7361            |                   | 0.7479            | 0.6699   |
| Depolar (U) -- | 0.8480            |                   | 0.8558            | 0.8023   |
| Atom AN        | X Y Z             | X Y Z             | X Y Z             |          |
| 1 6            | 0.04 0.03 -0.09   | 0.03 -0.01 -0.06  | -0.02 -0.19 -0.13 |          |
| 2 6            | 0.07 0.01 -0.05   | -0.01 0.01 -0.03  | -0.16 -0.08 -0.15 |          |
| 3 6            | -0.03 0.00 -0.08  | 0.03 -0.02 0.01   | 0.16 -0.13 -0.04  |          |
| 4 6            | 0.07 0.11 0.02    | 0.04 -0.07 -0.06  | -0.01 -0.06 -0.01 |          |
| 5 6            | 0.06 -0.08 -0.01  | 0.00 -0.02 -0.05  | -0.16 0.07 -0.12  |          |
| 6 6            | 0.03 0.02 0.03    | 0.05 0.08 0.09    | -0.08 -0.03 -0.02 |          |
| 7 6            | -0.04 -0.08 0.05  | 0.03 -0.03 0.06   | 0.19 0.05 0.06    |          |
| 8 1            | -0.09 0.04 -0.10  | 0.03 -0.01 0.03   | 0.28 -0.22 0.00   |          |
| 9 8            | 0.12 -0.01 -0.01  | 0.05 0.05 0.03    | -0.08 0.12 0.06   |          |
| 10 8           | 0.04 0.29 0.21    | -0.01 -0.20 -0.16 | 0.11 0.13 0.10    |          |
| 11 6           | 0.01 -0.11 0.09   | 0.01 -0.02 -0.01  | 0.02 0.16 0.00    |          |
| 12 6           | 0.02 -0.05 -0.02  | -0.01 -0.04 -0.03 | -0.12 0.02 -0.03  |          |
| 13 8           | -0.07 0.05 0.01   | 0.00 0.03 0.02    | 0.07 -0.01 0.06   |          |
| 14 8           | 0.06 -0.02 0.07   | 0.21 0.19 0.22    | 0.01 0.08 0.04    |          |
| 15 1           | -0.08 -0.10 0.13  | 0.03 -0.03 0.13   | 0.33 0.11 0.18    |          |
| 16 1           | -0.02 0.18 0.27   | -0.23 -0.53 -0.25 | 0.13 0.17 0.12    |          |
| 17 1           | 0.01 -0.16 0.20   | 0.01 0.00 0.00    | 0.03 0.32 0.06    |          |
| 18 8           | -0.01 0.05 -0.04  | 0.01 -0.01 0.00   | -0.05 -0.17 0.05  |          |
| 19 8           | -0.10 -0.09 -0.03 | -0.06 -0.08 -0.01 | 0.03 0.01 0.02    |          |
| 20 1           | -0.25 0.02 -0.05  | -0.10 -0.04 0.02  | 0.30 -0.16 0.17   |          |
| 21 8           | -0.18 -0.14 -0.17 | -0.29 0.15 -0.03  | -0.02 -0.03 -0.03 |          |
| 22 1           | -0.24 0.02 -0.07  | -0.42 0.01 0.12   | -0.05 0.04 0.03   |          |
| 23 1           | -0.08 -0.39 -0.36 | 0.07 -0.05 -0.10  | -0.03 -0.01 -0.02 |          |

|                | 13               | 14                | 15               |          |
|----------------|------------------|-------------------|------------------|----------|
|                | A                | A                 | A                |          |
| Frequencies -- | 292.7045         |                   | 338.9078         | 345.8926 |
| Red. masses -- | 6.3701           |                   | 3.3129           | 2.2297   |
| Frc consts --  | 0.3216           |                   | 0.2242           | 0.1572   |
| IR Inten --    | 2.5740           |                   | 43.5063          | 37.5194  |
| Raman Activ -- | 1.6770           |                   | 0.5800           | 2.1074   |
| Depolar (P) -- | 0.5825           |                   | 0.6513           | 0.0820   |
| Depolar (U) -- | 0.7362           |                   | 0.7888           | 0.1516   |
| Atom AN        | X Y Z            | X Y Z             | X Y Z            |          |
| 1 6            | 0.08 0.02 0.03   | 0.00 -0.01 0.08   | 0.02 0.02 -0.05  |          |
| 2 6            | -0.02 0.08 0.03  | 0.00 0.01 -0.11   | 0.00 0.01 0.04   |          |
| 3 6            | 0.04 0.00 -0.02  | -0.02 -0.01 0.01  | 0.01 0.01 0.11   |          |
| 4 6            | 0.14 -0.03 0.02  | 0.00 -0.03 0.08   | 0.05 0.04 -0.08  |          |
| 5 6            | -0.05 -0.06 0.07 | -0.01 -0.01 0.07  | -0.02 -0.01 0.05 |          |
| 6 6            | -0.09 0.16 -0.04 | 0.04 0.04 -0.12   | -0.01 -0.01 0.02 |          |
| 7 6            | 0.02 -0.06 -0.05 | -0.02 -0.01 -0.11 | 0.01 0.00 0.01   |          |
| 8 1            | -0.02 0.04 -0.06 | -0.03 -0.01 0.01  | 0.00 0.02 0.22   |          |
| 9 8            | 0.18 -0.04 0.04  | -0.12 -0.01 0.00  | 0.13 0.03 -0.02  |          |
| 10 8           | 0.21 -0.06 -0.03 | 0.12 -0.03 0.04   | -0.05 0.04 -0.04 |          |
| 11 6           | -0.03 -0.05 0.04 | -0.02 -0.02 0.05  | -0.01 0.01 -0.11 |          |
| 12 6           | -0.07 -0.12 0.02 | -0.02 0.01 0.06   | -0.04 -0.02 0.04 |          |
| 13 8           | -0.13 0.22 0.00  | -0.01 0.17 -0.04  | 0.03 -0.04 0.00  |          |
| 14 8           | -0.13 0.15 -0.08 | 0.11 -0.10 -0.04  | -0.06 0.01 -0.03 |          |
| 15 1           | 0.01 -0.06 -0.11 | -0.02 -0.01 -0.25 | 0.01 0.00 0.02   |          |
| 16 1           | 0.25 0.05 -0.12  | -0.06 -0.26 -0.06 | -0.04 -0.01 0.10 |          |
| 17 1           | -0.02 0.01 0.05  | -0.02 -0.03 0.11  | -0.01 0.04 -0.26 |          |



|                |    |          |       |       |          |       |       |          |       |       |
|----------------|----|----------|-------|-------|----------|-------|-------|----------|-------|-------|
| 18             | 8  | -0.12    | -0.16 | -0.05 | -0.06    | -0.03 | 0.00  | -0.08    | -0.08 | 0.00  |
| 19             | 8  | -0.11    | -0.12 | 0.01  | 0.03     | 0.07  | 0.03  | -0.01    | 0.02  | 0.02  |
| 20             | 1  | -0.23    | -0.04 | -0.05 | 0.01     | 0.07  | -0.08 | -0.04    | 0.03  | -0.05 |
| 21             | 8  | 0.09     | 0.02  | 0.03  | -0.05    | 0.02  | 0.03  | 0.00     | 0.01  | 0.05  |
| 22             | 1  | 0.19     | 0.08  | -0.11 | -0.19    | -0.17 | 0.24  | -0.10    | -0.06 | 0.23  |
| 23             | 1  | -0.30    | 0.46  | 0.30  | 0.54     | -0.45 | -0.21 | 0.52     | -0.59 | -0.31 |
|                |    | 16       |       |       | 17       |       |       | 18       |       |       |
|                |    | A        |       |       | A        |       |       | A        |       |       |
| Frequencies -- |    | 358.3918 |       |       | 386.3949 |       |       | 414.4478 |       |       |
| Red. masses -- |    | 2.8667   |       |       | 5.7351   |       |       | 6.0334   |       |       |
| Frc consts --  |    | 0.2169   |       |       | 0.5045   |       |       | 0.6106   |       |       |
| IR Inten --    |    | 56.3762  |       |       | 13.7352  |       |       | 11.1621  |       |       |
| Raman Activ -- |    | 0.5343   |       |       | 1.6719   |       |       | 6.6212   |       |       |
| Depolar (P) -- |    | 0.7385   |       |       | 0.5756   |       |       | 0.1056   |       |       |
| Depolar (U) -- |    | 0.8496   |       |       | 0.7306   |       |       | 0.1910   |       |       |
| Atom           | AN | X        | Y     | Z     | X        | Y     | Z     | X        | Y     | Z     |
| 1              | 6  | -0.01    | -0.01 | -0.06 | 0.00     | 0.06  | 0.04  | -0.02    | 0.16  | 0.10  |
| 2              | 6  | 0.00     | -0.02 | -0.08 | 0.07     | 0.02  | 0.06  | -0.01    | 0.08  | 0.02  |
| 3              | 6  | -0.05    | -0.02 | 0.13  | 0.19     | 0.11  | 0.06  | -0.05    | 0.19  | -0.08 |
| 4              | 6  | 0.02     | 0.01  | -0.03 | -0.11    | 0.04  | -0.01 | 0.05     | 0.09  | 0.08  |
| 5              | 6  | -0.02    | 0.00  | 0.06  | 0.07     | -0.05 | 0.11  | -0.08    | 0.11  | -0.09 |
| 6              | 6  | 0.04     | -0.03 | -0.03 | 0.09     | 0.03  | -0.02 | 0.07     | -0.08 | 0.01  |
| 7              | 6  | -0.05    | -0.02 | -0.04 | 0.21     | 0.08  | -0.04 | -0.06    | 0.20  | 0.01  |
| 8              | 1  | -0.06    | -0.01 | 0.30  | 0.27     | 0.05  | 0.07  | -0.06    | 0.20  | -0.21 |
| 9              | 8  | 0.10     | -0.02 | 0.02  | -0.15    | 0.04  | -0.05 | 0.11     | -0.07 | 0.00  |
| 10             | 8  | -0.01    | 0.02  | -0.01 | -0.22    | 0.02  | 0.01  | 0.10     | -0.01 | -0.02 |
| 11             | 6  | -0.05    | -0.02 | -0.10 | 0.22     | 0.04  | -0.03 | -0.04    | 0.16  | 0.08  |
| 12             | 6  | -0.05    | 0.03  | 0.09  | -0.02    | -0.10 | 0.04  | -0.12    | 0.00  | -0.07 |
| 13             | 8  | 0.00     | 0.01  | -0.01 | -0.05    | 0.08  | -0.03 | 0.10     | -0.15 | -0.05 |
| 14             | 8  | 0.12     | -0.08 | 0.05  | 0.08     | -0.08 | -0.01 | 0.08     | -0.18 | 0.04  |
| 15             | 1  | -0.05    | -0.02 | -0.06 | 0.15     | 0.06  | -0.13 | -0.08    | 0.19  | 0.03  |
| 16             | 1  | 0.03     | 0.09  | -0.03 | -0.12    | 0.12  | 0.13  | -0.06    | -0.17 | -0.22 |
| 17             | 1  | -0.05    | -0.04 | -0.21 | 0.22     | 0.15  | -0.13 | -0.04    | 0.17  | 0.20  |
| 18             | 8  | -0.09    | -0.03 | 0.02  | -0.09    | -0.16 | -0.06 | -0.07    | -0.17 | -0.01 |
| 19             | 8  | 0.06     | 0.13  | 0.04  | -0.09    | -0.11 | 0.02  | -0.10    | -0.10 | 0.02  |
| 20             | 1  | 0.09     | 0.08  | -0.12 | -0.35    | 0.07  | -0.10 | 0.08     | -0.18 | 0.32  |
| 21             | 8  | -0.03    | -0.01 | -0.07 | -0.01    | -0.01 | -0.03 | -0.02    | -0.01 | -0.03 |
| 22             | 1  | 0.06     | 0.08  | -0.22 | 0.11     | 0.13  | -0.21 | -0.10    | -0.21 | 0.07  |
| 23             | 1  | -0.52    | 0.53  | 0.25  | -0.39    | 0.11  | -0.02 | 0.15     | 0.23  | 0.21  |
|                |    | 19       |       |       | 20       |       |       | 21       |       |       |
|                |    | A        |       |       | A        |       |       | A        |       |       |
| Frequencies -- |    | 475.2256 |       |       | 524.6552 |       |       | 537.6940 |       |       |
| Red. masses -- |    | 1.1465   |       |       | 1.4204   |       |       | 3.2047   |       |       |
| Frc consts --  |    | 0.1525   |       |       | 0.2304   |       |       | 0.5459   |       |       |
| IR Inten --    |    | 38.8947  |       |       | 74.0798  |       |       | 42.2589  |       |       |
| Raman Activ -- |    | 1.2640   |       |       | 0.9396   |       |       | 0.3841   |       |       |
| Depolar (P) -- |    | 0.5632   |       |       | 0.7306   |       |       | 0.6575   |       |       |
| Depolar (U) -- |    | 0.7206   |       |       | 0.8443   |       |       | 0.7933   |       |       |
| Atom           | AN | X        | Y     | Z     | X        | Y     | Z     | X        | Y     | Z     |
| 1              | 6  | 0.01     | 0.00  | 0.03  | 0.01     | -0.01 | 0.06  | -0.02    | -0.05 | 0.08  |
| 2              | 6  | 0.00     | 0.00  | 0.00  | 0.01     | -0.01 | 0.05  | -0.07    | -0.03 | -0.06 |
| 3              | 6  | -0.02    | 0.00  | -0.01 | 0.02     | -0.02 | 0.02  | 0.00     | -0.06 | 0.15  |
| 4              | 6  | 0.02     | 0.00  | 0.00  | 0.00     | 0.02  | -0.02 | 0.00     | 0.01  | -0.05 |
| 5              | 6  | -0.01    | 0.01  | -0.02 | 0.00     | -0.04 | 0.01  | -0.04    | 0.06  | 0.08  |
| 6              | 6  | 0.02     | -0.01 | 0.01  | 0.02     | 0.02  | -0.01 | -0.06    | -0.05 | -0.04 |
| 7              | 6  | -0.02    | 0.01  | 0.00  | 0.02     | -0.04 | -0.02 | -0.01    | 0.05  | -0.19 |
| 8              | 1  | -0.02    | 0.01  | -0.03 | 0.01     | -0.02 | -0.04 | 0.04     | -0.09 | 0.19  |
| 9              | 8  | 0.00     | 0.01  | -0.01 | 0.03     | 0.00  | -0.01 | 0.08     | 0.00  | 0.00  |
| 10             | 8  | 0.02     | -0.02 | -0.02 | -0.05    | 0.01  | -0.02 | -0.05    | 0.02  | -0.06 |
| 11             | 6  | -0.02    | 0.01  | 0.01  | 0.03     | -0.04 | 0.03  | -0.06    | 0.08  | 0.17  |

|    |   |       |       |       |       |       |       |       |       |       |
|----|---|-------|-------|-------|-------|-------|-------|-------|-------|-------|
| 12 | 6 | -0.02 | 0.01  | -0.01 | -0.06 | 0.01  | -0.04 | 0.07  | 0.00  | -0.05 |
| 13 | 8 | -0.01 | 0.00  | 0.01  | -0.01 | 0.04  | 0.00  | 0.03  | -0.01 | 0.02  |
| 14 | 8 | 0.02  | -0.02 | 0.01  | 0.01  | 0.00  | -0.01 | 0.02  | 0.01  | 0.03  |
| 15 | 1 | -0.01 | 0.01  | -0.01 | 0.01  | -0.04 | -0.11 | 0.07  | 0.09  | -0.51 |
| 16 | 1 | 0.05  | -0.03 | 0.08  | 0.07  | 0.16  | 0.05  | 0.27  | 0.46  | 0.12  |
| 17 | 1 | -0.02 | 0.00  | 0.04  | 0.03  | -0.03 | 0.00  | -0.05 | 0.10  | 0.22  |
| 18 | 8 | -0.01 | -0.01 | 0.00  | -0.02 | 0.03  | 0.02  | 0.09  | 0.03  | -0.03 |
| 19 | 8 | -0.01 | 0.00  | 0.00  | -0.03 | 0.02  | -0.06 | -0.02 | -0.10 | -0.02 |
| 20 | 1 | 0.09  | -0.05 | 0.08  | 0.69  | -0.42 | 0.48  | -0.28 | 0.10  | -0.04 |
| 21 | 8 | 0.01  | 0.02  | 0.05  | -0.01 | 0.00  | -0.01 | -0.03 | 0.00  | -0.01 |
| 22 | 1 | 0.24  | 0.36  | -0.31 | -0.06 | -0.01 | 0.08  | -0.10 | 0.14  | 0.13  |
| 23 | 1 | -0.50 | -0.45 | -0.47 | 0.08  | 0.05  | 0.06  | 0.02  | -0.02 | -0.01 |

22

23

24

A

A

A

|                |          |          |          |
|----------------|----------|----------|----------|
| Frequencies -- | 575.3289 | 593.2736 | 621.9502 |
| Red. masses -- | 1.3997   | 4.7210   | 4.1030   |
| Frc consts --  | 0.2730   | 0.9790   | 0.9351   |
| IR Inten --    | 137.4525 | 7.2780   | 21.8910  |
| Raman Activ -- | 2.7752   | 0.6239   | 0.7958   |
| Depolar (P) -- | 0.5379   | 0.7375   | 0.7500   |
| Depolar (U) -- | 0.6995   | 0.8489   | 0.8571   |

| Atom | AN | X     | Y     | Z     | X     | Y     | Z     | X     | Y     | Z     |
|------|----|-------|-------|-------|-------|-------|-------|-------|-------|-------|
| 1    | 6  | -0.02 | -0.01 | 0.05  | -0.01 | -0.11 | 0.01  | 0.06  | -0.05 | 0.28  |
| 2    | 6  | 0.01  | -0.01 | 0.03  | -0.06 | -0.02 | 0.26  | -0.01 | -0.03 | 0.05  |
| 3    | 6  | -0.01 | 0.00  | -0.07 | -0.04 | -0.14 | -0.07 | 0.03  | -0.12 | -0.03 |
| 4    | 6  | -0.03 | 0.00  | 0.02  | 0.01  | -0.07 | -0.09 | 0.07  | 0.13  | -0.01 |
| 5    | 6  | 0.00  | 0.00  | -0.05 | -0.07 | 0.09  | 0.18  | -0.04 | 0.01  | -0.23 |
| 6    | 6  | 0.03  | 0.00  | -0.01 | 0.06  | 0.03  | -0.08 | -0.01 | 0.00  | -0.02 |
| 7    | 6  | 0.00  | 0.00  | 0.07  | -0.02 | 0.03  | 0.15  | 0.04  | -0.10 | 0.00  |
| 8    | 1  | 0.00  | 0.00  | -0.16 | 0.00  | -0.17 | -0.36 | 0.01  | -0.11 | -0.32 |
| 9    | 8  | 0.00  | -0.03 | 0.03  | 0.04  | 0.03  | 0.01  | 0.08  | 0.04  | -0.09 |
| 10   | 8  | 0.01  | -0.03 | -0.05 | -0.01 | 0.04  | 0.03  | -0.13 | 0.04  | -0.02 |
| 11   | 6  | 0.01  | -0.01 | -0.04 | -0.15 | 0.12  | -0.09 | -0.03 | -0.02 | 0.04  |
| 12   | 6  | -0.02 | 0.00  | 0.01  | 0.06  | 0.02  | -0.06 | -0.09 | 0.05  | -0.04 |
| 13   | 8  | -0.01 | 0.02  | -0.01 | -0.01 | 0.12  | -0.05 | -0.02 | 0.03  | 0.00  |
| 14   | 8  | 0.02  | -0.02 | -0.01 | 0.10  | -0.10 | -0.04 | 0.02  | 0.01  | -0.01 |
| 15   | 1  | 0.00  | -0.01 | 0.14  | 0.14  | 0.11  | 0.03  | 0.11  | -0.07 | -0.06 |
| 16   | 1  | 0.50  | 0.70  | 0.12  | -0.17 | -0.23 | 0.03  | -0.35 | -0.34 | 0.01  |
| 17   | 1  | 0.01  | -0.01 | -0.05 | -0.16 | 0.17  | -0.55 | -0.02 | 0.01  | 0.22  |
| 18   | 8  | -0.01 | -0.01 | 0.01  | 0.09  | 0.02  | -0.03 | -0.03 | -0.04 | 0.06  |
| 19   | 8  | 0.02  | 0.02  | 0.03  | -0.03 | -0.08 | -0.02 | 0.07  | 0.05  | 0.07  |
| 20   | 1  | -0.13 | 0.10  | -0.15 | -0.13 | 0.02  | 0.13  | -0.29 | 0.24  | -0.37 |
| 21   | 8  | -0.04 | 0.01  | 0.00  | 0.00  | 0.00  | -0.01 | 0.02  | -0.01 | -0.01 |
| 22   | 1  | -0.15 | 0.20  | 0.21  | 0.03  | -0.09 | -0.07 | 0.05  | -0.14 | -0.09 |
| 23   | 1  | 0.07  | -0.05 | -0.03 | -0.02 | 0.06  | 0.04  | 0.00  | 0.09  | 0.07  |

25

26

27

A

A

A

|                |          |          |          |
|----------------|----------|----------|----------|
| Frequencies -- | 670.7300 | 697.3731 | 725.5748 |
| Red. masses -- | 4.3485   | 5.4917   | 5.9700   |
| Frc consts --  | 1.1526   | 1.5736   | 1.8518   |
| IR Inten --    | 119.3275 | 67.6311  | 3.6037   |
| Raman Activ -- | 3.0987   | 2.1780   | 0.3877   |
| Depolar (P) -- | 0.1638   | 0.5100   | 0.4055   |
| Depolar (U) -- | 0.2815   | 0.6755   | 0.5770   |

| Atom | AN | X     | Y     | Z     | X     | Y     | Z     | X     | Y     | Z     |
|------|----|-------|-------|-------|-------|-------|-------|-------|-------|-------|
| 1    | 6  | -0.08 | 0.05  | 0.02  | 0.19  | 0.08  | -0.05 | -0.04 | -0.02 | -0.15 |
| 2    | 6  | -0.14 | 0.04  | 0.03  | -0.01 | 0.22  | -0.01 | 0.04  | 0.01  | 0.25  |
| 3    | 6  | 0.09  | 0.13  | 0.00  | 0.10  | 0.01  | -0.01 | -0.02 | 0.01  | 0.12  |
| 4    | 6  | -0.05 | -0.01 | -0.02 | 0.15  | -0.06 | 0.00  | -0.06 | -0.22 | -0.17 |
| 5    | 6  | -0.15 | -0.11 | 0.03  | -0.09 | 0.07  | 0.00  | -0.01 | 0.00  | -0.18 |

|    |   |       |       |       |       |       |       |       |       |       |
|----|---|-------|-------|-------|-------|-------|-------|-------|-------|-------|
| 6  | 6 | -0.03 | 0.03  | -0.03 | -0.02 | 0.12  | 0.03  | 0.23  | 0.12  | 0.16  |
| 7  | 6 | 0.07  | -0.01 | 0.01  | 0.05  | -0.20 | -0.02 | -0.03 | 0.01  | -0.18 |
| 8  | 1 | 0.10  | 0.11  | -0.08 | -0.12 | 0.18  | 0.15  | -0.02 | 0.01  | 0.44  |
| 9  | 8 | 0.05  | -0.02 | 0.05  | -0.10 | 0.11  | -0.12 | -0.01 | 0.03  | 0.08  |
| 10 | 8 | 0.04  | 0.05  | -0.04 | -0.07 | -0.12 | 0.12  | 0.05  | 0.05  | 0.03  |
| 11 | 6 | 0.02  | -0.01 | 0.01  | -0.22 | -0.01 | 0.01  | 0.01  | -0.02 | 0.11  |
| 12 | 6 | -0.09 | -0.18 | 0.00  | 0.02  | -0.03 | 0.03  | -0.12 | 0.09  | -0.13 |
| 13 | 8 | 0.05  | 0.00  | -0.04 | 0.10  | -0.06 | -0.10 | -0.06 | 0.03  | -0.07 |
| 14 | 8 | 0.01  | -0.07 | 0.04  | -0.04 | -0.12 | 0.08  | -0.01 | -0.06 | -0.08 |
| 15 | 1 | -0.03 | -0.05 | -0.08 | 0.15  | -0.15 | 0.08  | -0.05 | 0.00  | 0.09  |
| 16 | 1 | -0.10 | -0.11 | -0.15 | 0.26  | 0.21  | 0.48  | 0.03  | 0.00  | 0.08  |
| 17 | 1 | 0.03  | 0.18  | -0.09 | -0.21 | 0.12  | 0.08  | 0.02  | -0.08 | 0.53  |
| 18 | 8 | -0.03 | 0.18  | 0.15  | -0.01 | 0.02  | -0.01 | 0.01  | -0.03 | 0.05  |
| 19 | 8 | 0.15  | -0.08 | -0.13 | -0.01 | 0.00  | -0.01 | 0.05  | 0.01  | 0.05  |
| 20 | 1 | 0.10  | -0.15 | -0.75 | 0.02  | -0.02 | -0.01 | -0.14 | 0.11  | -0.14 |
| 21 | 8 | 0.01  | 0.00  | 0.01  | 0.00  | -0.01 | -0.02 | -0.01 | 0.00  | 0.00  |
| 22 | 1 | 0.04  | 0.00  | -0.05 | -0.11 | 0.17  | 0.17  | 0.00  | -0.08 | -0.02 |
| 23 | 1 | -0.05 | -0.06 | -0.06 | -0.02 | 0.15  | 0.11  | 0.05  | 0.03  | 0.03  |

28

29

30

A

A

A

|                |          |          |          |
|----------------|----------|----------|----------|
| Frequencies -- | 762.6021 | 771.5174 | 788.0806 |
| Red. masses -- | 2.3968   | 4.7758   | 5.5225   |
| Frc consts --  | 0.8213   | 1.6749   | 2.0208   |
| IR Inten --    | 53.6681  | 22.5366  | 14.3634  |
| Raman Activ -- | 2.9389   | 15.9243  | 1.6622   |
| Depolar (P) -- | 0.3966   | 0.0327   | 0.3062   |
| Depolar (U) -- | 0.5680   | 0.0633   | 0.4689   |

Atom AN

X

Y

Z

X

Y

Z

X

Y

Z

|    |   |       |       |       |       |       |       |       |       |       |
|----|---|-------|-------|-------|-------|-------|-------|-------|-------|-------|
| 1  | 6 | 0.02  | -0.05 | -0.04 | 0.05  | -0.02 | 0.04  | -0.05 | -0.02 | 0.22  |
| 2  | 6 | 0.01  | -0.03 | 0.05  | 0.08  | -0.07 | -0.03 | -0.04 | 0.03  | 0.01  |
| 3  | 6 | -0.02 | -0.11 | -0.04 | -0.10 | 0.02  | 0.01  | 0.00  | 0.02  | -0.02 |
| 4  | 6 | 0.02  | 0.15  | 0.12  | 0.17  | -0.13 | -0.11 | -0.06 | -0.22 | -0.21 |
| 5  | 6 | -0.01 | 0.03  | 0.00  | 0.05  | -0.01 | -0.03 | 0.03  | 0.01  | -0.14 |
| 6  | 6 | 0.08  | 0.00  | 0.04  | 0.02  | -0.11 | -0.01 | -0.08 | 0.04  | -0.05 |
| 7  | 6 | 0.00  | 0.05  | -0.08 | -0.12 | 0.23  | 0.04  | -0.02 | 0.05  | -0.04 |
| 8  | 1 | 0.04  | -0.14 | 0.44  | -0.05 | -0.01 | -0.20 | 0.06  | -0.02 | -0.09 |
| 9  | 8 | -0.01 | -0.03 | -0.04 | -0.01 | 0.13  | -0.12 | 0.05  | 0.03  | 0.08  |
| 10 | 8 | -0.02 | -0.03 | -0.02 | -0.02 | -0.11 | 0.15  | 0.00  | 0.10  | -0.02 |
| 11 | 6 | -0.06 | 0.09  | -0.04 | 0.06  | 0.06  | 0.01  | 0.01  | 0.01  | -0.07 |
| 12 | 6 | 0.03  | -0.10 | 0.09  | -0.07 | -0.09 | 0.04  | 0.22  | -0.15 | 0.27  |
| 13 | 8 | -0.03 | 0.01  | 0.00  | -0.06 | 0.00  | 0.08  | 0.06  | 0.01  | -0.04 |
| 14 | 8 | 0.01  | 0.01  | -0.04 | 0.03  | 0.07  | -0.07 | -0.01 | -0.04 | 0.06  |
| 15 | 1 | 0.18  | 0.11  | 0.60  | -0.15 | 0.23  | -0.18 | -0.03 | 0.04  | 0.43  |
| 16 | 1 | -0.01 | 0.03  | -0.10 | 0.17  | -0.01 | 0.53  | -0.08 | -0.09 | 0.10  |
| 17 | 1 | -0.04 | 0.08  | 0.44  | 0.04  | -0.09 | -0.08 | 0.02  | -0.08 | 0.56  |
| 18 | 8 | -0.04 | 0.04  | 0.01  | -0.07 | 0.04  | 0.08  | -0.04 | 0.01  | -0.11 |
| 19 | 8 | 0.00  | -0.03 | -0.06 | 0.05  | -0.06 | -0.08 | -0.09 | 0.07  | -0.02 |
| 20 | 1 | 0.11  | -0.12 | -0.13 | 0.13  | -0.16 | -0.35 | 0.17  | -0.09 | 0.17  |
| 21 | 8 | 0.00  | 0.00  | 0.00  | -0.01 | 0.00  | -0.02 | 0.00  | 0.00  | 0.00  |
| 22 | 1 | 0.01  | -0.03 | -0.02 | -0.08 | 0.07  | 0.11  | 0.02  | -0.03 | -0.02 |
| 23 | 1 | 0.02  | -0.02 | -0.01 | 0.04  | 0.14  | 0.11  | -0.03 | 0.02  | 0.00  |

31

32

33

A

A

A

|                |          |          |          |
|----------------|----------|----------|----------|
| Frequencies -- | 809.1850 | 838.5643 | 858.5974 |
| Red. masses -- | 2.7195   | 8.2293   | 6.5579   |
| Frc consts --  | 1.0492   | 3.4095   | 2.8484   |
| IR Inten --    | 22.1258  | 53.8884  | 4.3495   |
| Raman Activ -- | 1.4374   | 6.1586   | 1.1012   |
| Depolar (P) -- | 0.7147   | 0.1361   | 0.7461   |
| Depolar (U) -- | 0.8336   | 0.2396   | 0.8546   |

| Atom | AN | X     | Y     | Z     | X     | Y     | Z     | X     | Y     | Z     |
|------|----|-------|-------|-------|-------|-------|-------|-------|-------|-------|
| 1    | 6  | 0.00  | -0.03 | -0.02 | -0.03 | -0.11 | -0.05 | 0.02  | 0.02  | -0.28 |
| 2    | 6  | 0.03  | 0.02  | -0.10 | 0.02  | -0.04 | 0.02  | -0.01 | -0.01 | 0.35  |
| 3    | 6  | -0.01 | -0.08 | 0.05  | -0.16 | -0.19 | 0.01  | 0.02  | 0.02  | 0.11  |
| 4    | 6  | -0.03 | 0.02  | 0.02  | 0.05  | 0.08  | 0.06  | 0.01  | 0.10  | 0.10  |
| 5    | 6  | 0.00  | 0.03  | -0.09 | 0.10  | -0.05 | 0.01  | 0.02  | 0.02  | -0.29 |
| 6    | 6  | 0.17  | 0.09  | 0.17  | -0.17 | 0.35  | 0.00  | -0.19 | -0.11 | -0.22 |
| 7    | 6  | 0.01  | 0.02  | 0.09  | -0.09 | 0.21  | 0.01  | -0.01 | -0.01 | 0.01  |
| 8    | 1  | 0.02  | -0.11 | -0.39 | 0.04  | -0.35 | -0.01 | -0.01 | 0.03  | -0.14 |
| 9    | 8  | -0.01 | -0.03 | 0.02  | 0.01  | 0.00  | -0.04 | -0.03 | -0.02 | -0.02 |
| 10   | 8  | 0.00  | 0.02  | -0.03 | 0.00  | -0.04 | 0.01  | 0.02  | -0.05 | 0.01  |
| 11   | 6  | -0.06 | 0.05  | 0.06  | 0.25  | 0.00  | 0.00  | 0.01  | 0.00  | 0.12  |
| 12   | 6  | 0.06  | -0.08 | 0.11  | -0.07 | 0.02  | -0.06 | 0.09  | -0.08 | 0.15  |
| 13   | 8  | -0.03 | -0.03 | -0.04 | 0.19  | 0.04  | -0.24 | 0.04  | 0.06  | 0.04  |
| 14   | 8  | -0.05 | -0.01 | -0.03 | -0.16 | -0.13 | 0.24  | 0.08  | 0.00  | 0.03  |
| 15   | 1  | 0.12  | 0.09  | -0.71 | -0.09 | 0.21  | -0.03 | -0.04 | 0.00  | -0.64 |
| 16   | 1  | -0.02 | 0.03  | -0.10 | -0.01 | -0.07 | 0.01  | 0.02  | 0.02  | -0.11 |
| 17   | 1  | -0.07 | 0.08  | -0.33 | 0.23  | -0.25 | -0.03 | 0.00  | 0.00  | -0.17 |
| 18   | 8  | -0.04 | 0.02  | -0.02 | -0.01 | -0.02 | 0.03  | -0.04 | 0.00  | -0.04 |
| 19   | 8  | -0.02 | 0.01  | -0.03 | 0.02  | -0.02 | 0.01  | -0.03 | 0.05  | 0.00  |
| 20   | 1  | 0.08  | -0.06 | -0.05 | -0.02 | -0.01 | -0.11 | 0.07  | -0.03 | -0.03 |
| 21   | 8  | 0.00  | 0.00  | 0.01  | 0.03  | -0.01 | 0.00  | 0.00  | 0.00  | 0.00  |
| 22   | 1  | 0.04  | -0.10 | -0.06 | -0.07 | 0.25  | 0.16  | -0.04 | 0.13  | 0.07  |
| 23   | 1  | 0.03  | -0.02 | 0.00  | -0.10 | 0.02  | -0.01 | -0.04 | -0.02 | -0.03 |

34

35

36

A

A

A

|                |          |          |          |
|----------------|----------|----------|----------|
| Frequencies -- | 924.7406 | 947.7576 | 982.0838 |
| Red. masses -- | 6.6514   | 1.4193   | 1.0996   |
| Frc consts --  | 3.3512   | 0.7511   | 0.6248   |
| IR Inten --    | 14.1831  | 0.1794   | 212.3327 |
| Raman Activ -- | 0.4551   | 0.2663   | 1.2660   |
| Depolar (P) -- | 0.6660   | 0.7154   | 0.2499   |
| Depolar (U) -- | 0.7995   | 0.8341   | 0.3998   |

| Atom | AN | X     | Y     | Z     | X     | Y     | Z     | X     | Y     | Z     |
|------|----|-------|-------|-------|-------|-------|-------|-------|-------|-------|
| 1    | 6  | 0.24  | 0.04  | 0.01  | 0.00  | 0.00  | -0.05 | 0.00  | -0.01 | -0.01 |
| 2    | 6  | 0.29  | 0.14  | -0.01 | 0.00  | 0.00  | 0.00  | -0.02 | 0.00  | 0.01  |
| 3    | 6  | -0.04 | -0.13 | -0.01 | 0.01  | 0.01  | 0.11  | 0.00  | 0.01  | 0.01  |
| 4    | 6  | -0.13 | -0.12 | -0.03 | 0.00  | 0.02  | 0.02  | 0.02  | -0.01 | 0.01  |
| 5    | 6  | 0.21  | 0.16  | 0.02  | 0.00  | 0.00  | 0.05  | -0.01 | -0.01 | 0.00  |
| 6    | 6  | -0.14 | -0.06 | -0.10 | 0.00  | 0.00  | 0.00  | -0.01 | 0.01  | -0.01 |
| 7    | 6  | -0.01 | -0.01 | 0.02  | 0.00  | -0.01 | 0.02  | -0.01 | 0.01  | -0.01 |
| 8    | 1  | -0.20 | -0.01 | 0.04  | 0.03  | -0.01 | -0.64 | 0.01  | 0.00  | -0.05 |
| 9    | 8  | -0.08 | -0.07 | 0.15  | 0.00  | 0.00  | 0.00  | 0.00  | 0.01  | -0.02 |
| 10   | 8  | -0.03 | 0.13  | -0.12 | 0.00  | -0.01 | 0.01  | -0.01 | -0.02 | 0.01  |
| 11   | 6  | -0.11 | 0.06  | -0.01 | -0.01 | 0.00  | -0.13 | 0.01  | -0.01 | 0.00  |
| 12   | 6  | -0.14 | 0.01  | -0.03 | -0.01 | 0.01  | -0.02 | 0.00  | 0.00  | 0.00  |
| 13   | 8  | 0.04  | -0.01 | 0.03  | 0.00  | 0.00  | 0.00  | 0.01  | 0.00  | -0.01 |
| 14   | 8  | 0.00  | 0.03  | 0.05  | 0.00  | 0.00  | 0.00  | 0.00  | 0.00  | 0.03  |
| 15   | 1  | 0.32  | 0.14  | -0.10 | 0.00  | 0.00  | -0.13 | -0.04 | 0.00  | 0.04  |
| 16   | 1  | -0.08 | 0.12  | -0.22 | 0.01  | 0.00  | -0.02 | 0.17  | 0.26  | 0.05  |
| 17   | 1  | -0.13 | -0.15 | 0.07  | 0.01  | -0.07 | 0.73  | 0.01  | -0.01 | -0.02 |
| 18   | 8  | -0.11 | -0.02 | 0.11  | 0.01  | 0.00  | 0.00  | 0.00  | 0.00  | 0.00  |
| 19   | 8  | 0.05  | -0.11 | -0.07 | 0.00  | -0.01 | 0.00  | 0.00  | 0.00  | 0.00  |
| 20   | 1  | 0.09  | -0.19 | -0.33 | -0.01 | 0.00  | 0.01  | -0.01 | 0.01  | 0.01  |
| 21   | 8  | 0.00  | 0.01  | 0.01  | 0.00  | 0.00  | 0.00  | -0.03 | 0.03  | 0.02  |
| 22   | 1  | 0.09  | -0.21 | -0.15 | -0.01 | 0.02  | 0.01  | 0.27  | -0.74 | -0.50 |
| 23   | 1  | 0.00  | -0.06 | -0.05 | 0.00  | 0.00  | 0.00  | 0.08  | -0.07 | -0.05 |

37

38

39

A

A

A

|                |          |           |           |
|----------------|----------|-----------|-----------|
| Frequencies -- | 988.3143 | 1092.7331 | 1143.1877 |
|----------------|----------|-----------|-----------|

|                |        |         |         |
|----------------|--------|---------|---------|
| Red. masses -- | 1.3288 | 2.8110  | 7.8368  |
| Frc consts --  | 0.7647 | 1.9776  | 6.0342  |
| IR Inten --    | 1.2576 | 12.3398 | 60.2942 |
| Raman Activ -- | 0.1033 | 31.3201 | 0.1926  |
| Depolar (P) -- | 0.7498 | 0.0578  | 0.3888  |
| Depolar (U) -- | 0.8570 | 0.1092  | 0.5599  |

  

| Atom | AN | X     | Y     | Z     | X     | Y     | Z     | X     | Y     | Z     |
|------|----|-------|-------|-------|-------|-------|-------|-------|-------|-------|
| 1    | 6  | -0.01 | -0.01 | 0.02  | 0.00  | -0.05 | 0.00  | 0.28  | 0.02  | -0.02 |
| 2    | 6  | -0.01 | -0.01 | 0.02  | 0.06  | -0.13 | 0.00  | -0.12 | 0.29  | 0.00  |
| 3    | 6  | 0.00  | 0.01  | -0.10 | 0.20  | 0.12  | -0.01 | 0.01  | -0.14 | 0.00  |
| 4    | 6  | 0.00  | 0.00  | -0.01 | 0.01  | 0.01  | 0.02  | 0.10  | -0.08 | 0.10  |
| 5    | 6  | -0.01 | 0.00  | 0.01  | 0.05  | -0.04 | -0.01 | -0.19 | -0.22 | 0.02  |
| 6    | 6  | 0.00  | 0.00  | 0.00  | -0.01 | 0.03  | 0.00  | -0.01 | -0.02 | 0.01  |
| 7    | 6  | 0.01  | 0.00  | 0.11  | -0.06 | 0.11  | 0.00  | -0.10 | 0.23  | 0.01  |
| 8    | 1  | -0.01 | 0.02  | 0.61  | 0.63  | -0.18 | 0.05  | 0.26  | -0.31 | -0.01 |
| 9    | 8  | 0.01  | 0.01  | -0.01 | 0.00  | 0.00  | 0.00  | -0.08 | -0.04 | 0.06  |
| 10   | 8  | 0.00  | 0.00  | 0.00  | -0.01 | 0.01  | -0.01 | -0.06 | 0.11  | -0.13 |
| 11   | 6  | 0.01  | 0.00  | -0.07 | -0.23 | -0.05 | 0.01  | 0.08  | -0.09 | -0.01 |
| 12   | 6  | 0.00  | 0.00  | 0.00  | -0.01 | 0.00  | -0.03 | -0.01 | -0.16 | -0.13 |
| 13   | 8  | 0.00  | 0.00  | 0.00  | 0.01  | 0.03  | -0.03 | -0.04 | -0.07 | 0.08  |
| 14   | 8  | 0.00  | 0.00  | 0.00  | -0.03 | 0.00  | 0.03  | 0.08  | -0.01 | -0.09 |
| 15   | 1  | -0.02 | 0.01  | -0.64 | -0.07 | 0.13  | 0.00  | -0.04 | 0.27  | 0.00  |
| 16   | 1  | 0.01  | 0.01  | 0.02  | -0.02 | -0.01 | -0.01 | -0.07 | -0.04 | 0.09  |
| 17   | 1  | 0.02  | -0.03 | 0.42  | -0.29 | -0.55 | -0.06 | 0.05  | -0.34 | 0.00  |
| 18   | 8  | 0.01  | 0.00  | 0.00  | 0.00  | 0.00  | 0.00  | 0.11  | 0.03  | -0.06 |
| 19   | 8  | 0.00  | 0.00  | 0.00  | 0.00  | 0.02  | 0.02  | -0.07 | 0.14  | 0.16  |
| 20   | 1  | -0.01 | 0.01  | 0.01  | 0.03  | -0.01 | -0.03 | 0.14  | -0.06 | -0.17 |
| 21   | 8  | 0.00  | 0.00  | 0.00  | 0.00  | 0.00  | 0.00  | 0.01  | -0.01 | -0.01 |
| 22   | 1  | 0.02  | -0.06 | -0.04 | 0.00  | 0.01  | 0.01  | -0.03 | 0.04  | 0.03  |
| 23   | 1  | 0.01  | 0.00  | 0.00  | 0.00  | 0.00  | 0.00  | 0.00  | 0.03  | 0.02  |

40

41

42

A

A

A

|                |           |           |           |
|----------------|-----------|-----------|-----------|
| Frequencies -- | 1170.7083 | 1185.8448 | 1209.2535 |
| Red. masses -- | 1.7511    | 2.2051    | 1.6843    |
| Frc consts --  | 1.4140    | 1.8270    | 1.4511    |
| IR Inten --    | 99.0806   | 29.2824   | 127.8603  |
| Raman Activ -- | 3.2400    | 12.0701   | 5.6055    |
| Depolar (P) -- | 0.7488    | 0.2304    | 0.3295    |
| Depolar (U) -- | 0.8563    | 0.3745    | 0.4957    |

| Atom | AN | X     | Y     | Z     | X     | Y     | Z     | X     | Y     | Z     |
|------|----|-------|-------|-------|-------|-------|-------|-------|-------|-------|
| 1    | 6  | -0.06 | 0.03  | 0.00  | 0.11  | -0.03 | -0.01 | -0.05 | 0.05  | 0.01  |
| 2    | 6  | 0.06  | -0.03 | 0.00  | 0.07  | -0.18 | 0.00  | 0.05  | 0.05  | -0.01 |
| 3    | 6  | -0.06 | 0.01  | 0.00  | 0.00  | 0.06  | 0.00  | 0.01  | -0.05 | -0.01 |
| 4    | 6  | -0.05 | 0.02  | -0.05 | 0.05  | -0.04 | 0.04  | -0.07 | 0.03  | -0.06 |
| 5    | 6  | 0.00  | -0.07 | 0.00  | -0.02 | -0.08 | 0.00  | 0.06  | 0.00  | 0.01  |
| 6    | 6  | -0.01 | 0.00  | -0.01 | 0.00  | 0.02  | 0.00  | -0.01 | -0.01 | -0.01 |
| 7    | 6  | 0.09  | 0.03  | 0.00  | -0.04 | -0.01 | 0.00  | -0.03 | -0.04 | 0.00  |
| 8    | 1  | -0.30 | 0.19  | -0.01 | -0.36 | 0.34  | -0.03 | 0.45  | -0.39 | 0.02  |
| 9    | 8  | 0.02  | 0.01  | -0.01 | -0.04 | -0.02 | 0.03  | 0.02  | 0.01  | -0.02 |
| 10   | 8  | 0.02  | -0.04 | 0.05  | -0.03 | 0.05  | -0.06 | 0.03  | -0.05 | 0.06  |
| 11   | 6  | -0.06 | -0.01 | 0.00  | -0.03 | 0.09  | 0.00  | -0.02 | 0.04  | 0.00  |
| 12   | 6  | -0.01 | -0.07 | -0.06 | 0.00  | -0.05 | -0.03 | -0.02 | -0.05 | -0.05 |
| 13   | 8  | 0.01  | 0.01  | 0.00  | 0.01  | 0.03  | -0.03 | 0.00  | 0.00  | 0.01  |
| 14   | 8  | -0.01 | 0.01  | 0.02  | -0.03 | 0.01  | 0.03  | 0.00  | 0.00  | 0.00  |
| 15   | 1  | 0.79  | 0.34  | 0.00  | -0.27 | -0.11 | 0.00  | -0.34 | -0.18 | -0.01 |
| 16   | 1  | 0.02  | 0.03  | -0.07 | -0.03 | -0.05 | 0.10  | 0.02  | 0.07  | -0.15 |
| 17   | 1  | -0.07 | -0.08 | 0.00  | 0.02  | 0.73  | 0.07  | 0.02  | 0.45  | 0.04  |
| 18   | 8  | 0.04  | 0.01  | -0.02 | 0.03  | 0.01  | -0.02 | 0.03  | 0.00  | -0.02 |
| 19   | 8  | -0.04 | 0.06  | 0.08  | -0.02 | 0.04  | 0.05  | -0.05 | 0.03  | 0.07  |
| 20   | 1  | 0.12  | -0.10 | -0.19 | 0.08  | -0.06 | -0.12 | 0.19  | -0.21 | -0.35 |

|                |    |           |       |       |           |       |       |           |       |       |
|----------------|----|-----------|-------|-------|-----------|-------|-------|-----------|-------|-------|
| 21             | 8  | 0.00      | 0.00  | 0.00  | 0.00      | 0.00  | 0.00  | 0.00      | 0.00  | 0.00  |
| 22             | 1  | 0.01      | -0.02 | -0.01 | -0.01     | 0.01  | 0.01  | 0.01      | -0.01 | -0.01 |
| 23             | 1  | 0.00      | -0.02 | -0.01 | 0.00      | 0.02  | 0.01  | 0.00      | -0.02 | -0.02 |
|                |    | 43        |       |       | 44        |       |       | 45        |       |       |
|                |    | A         |       |       | A         |       |       | A         |       |       |
| Frequencies -- |    | 1248.7550 |       |       | 1284.7217 |       |       | 1326.0940 |       |       |
| Red. masses -- |    | 1.6586    |       |       | 1.9124    |       |       | 7.5200    |       |       |
| Frc consts --  |    | 1.5239    |       |       | 1.8597    |       |       | 7.7914    |       |       |
| IR Inten --    |    | 69.2520   |       |       | 224.2532  |       |       | 7.4497    |       |       |
| Raman Activ -- |    | 9.8707    |       |       | 8.8980    |       |       | 2.7859    |       |       |
| Depolar (P) -- |    | 0.1788    |       |       | 0.1351    |       |       | 0.7476    |       |       |
| Depolar (U) -- |    | 0.3034    |       |       | 0.2380    |       |       | 0.8556    |       |       |
| Atom           | AN | X         | Y     | Z     | X         | Y     | Z     | X         | Y     | Z     |
| 1              | 6  | -0.01     | -0.07 | 0.00  | -0.16     | 0.05  | -0.02 | 0.04      | 0.35  | 0.00  |
| 2              | 6  | -0.07     | -0.02 | 0.00  | 0.03      | 0.02  | 0.00  | -0.34     | -0.14 | 0.00  |
| 3              | 6  | 0.02      | 0.03  | 0.00  | -0.06     | 0.02  | 0.00  | 0.21      | -0.17 | -0.01 |
| 4              | 6  | 0.02      | 0.00  | 0.02  | 0.11      | -0.04 | 0.08  | 0.00      | -0.03 | -0.02 |
| 5              | 6  | 0.03      | 0.16  | 0.02  | 0.05      | 0.01  | 0.00  | 0.28      | -0.17 | -0.01 |
| 6              | 6  | 0.01      | 0.01  | 0.02  | -0.01     | 0.01  | -0.01 | 0.02      | 0.02  | 0.03  |
| 7              | 6  | 0.02      | -0.04 | 0.00  | 0.03      | -0.05 | 0.00  | -0.24     | -0.12 | 0.01  |
| 8              | 1  | -0.25     | 0.23  | -0.01 | 0.28      | -0.25 | 0.00  | -0.17     | 0.11  | 0.00  |
| 9              | 8  | 0.00      | 0.00  | 0.00  | -0.02     | -0.02 | 0.02  | -0.02     | 0.00  | 0.02  |
| 10             | 8  | -0.01     | 0.01  | -0.02 | 0.00      | 0.05  | -0.11 | 0.01      | 0.00  | 0.00  |
| 11             | 6  | 0.04      | 0.01  | 0.00  | -0.02     | -0.01 | 0.00  | 0.04      | 0.27  | 0.01  |
| 12             | 6  | -0.01     | -0.02 | -0.01 | 0.00      | 0.02  | 0.00  | -0.01     | 0.05  | 0.00  |
| 13             | 8  | 0.00      | 0.00  | 0.00  | 0.00      | -0.01 | 0.01  | -0.01     | 0.01  | -0.01 |
| 14             | 8  | 0.01      | 0.00  | -0.01 | 0.01      | 0.00  | 0.00  | 0.01      | -0.02 | -0.02 |
| 15             | 1  | -0.19     | -0.13 | 0.01  | 0.26      | 0.05  | -0.01 | 0.45      | 0.19  | -0.02 |
| 16             | 1  | -0.01     | -0.03 | 0.05  | 0.10      | -0.28 | 0.75  | 0.04      | 0.01  | 0.07  |
| 17             | 1  | 0.01      | -0.50 | -0.04 | 0.00      | 0.16  | 0.01  | -0.01     | -0.34 | -0.03 |
| 18             | 8  | 0.03      | -0.01 | -0.03 | 0.00      | -0.01 | 0.00  | -0.02     | -0.02 | 0.01  |
| 19             | 8  | -0.06     | 0.00  | 0.06  | -0.01     | -0.01 | 0.01  | 0.00      | -0.01 | 0.00  |
| 20             | 1  | 0.27      | -0.34 | -0.57 | 0.06      | -0.08 | -0.12 | 0.04      | -0.04 | -0.06 |
| 21             | 8  | 0.00      | 0.00  | 0.00  | 0.00      | 0.00  | -0.01 | 0.00      | 0.00  | 0.00  |
| 22             | 1  | 0.00      | -0.01 | -0.01 | 0.00      | -0.05 | -0.03 | 0.00      | -0.01 | -0.01 |
| 23             | 1  | 0.00      | 0.01  | 0.01  | 0.02      | 0.07  | 0.06  | 0.01      | 0.00  | 0.01  |
|                |    | 46        |       |       | 47        |       |       | 48        |       |       |
|                |    | A         |       |       | A         |       |       | A         |       |       |
| Frequencies -- |    | 1392.9636 |       |       | 1394.6359 |       |       | 1430.1191 |       |       |
| Red. masses -- |    | 7.4099    |       |       | 2.2593    |       |       | 2.6216    |       |       |
| Frc consts --  |    | 8.4711    |       |       | 2.5891    |       |       | 3.1591    |       |       |
| IR Inten --    |    | 204.6828  |       |       | 142.4347  |       |       | 195.4763  |       |       |
| Raman Activ -- |    | 8.5925    |       |       | 7.2362    |       |       | 18.3737   |       |       |
| Depolar (P) -- |    | 0.2269    |       |       | 0.1743    |       |       | 0.0435    |       |       |
| Depolar (U) -- |    | 0.3699    |       |       | 0.2969    |       |       | 0.0834    |       |       |
| Atom           | AN | X         | Y     | Z     | X         | Y     | Z     | X         | Y     | Z     |
| 1              | 6  | -0.10     | -0.07 | 0.01  | 0.01      | -0.01 | 0.00  | 0.07      | -0.04 | 0.00  |
| 2              | 6  | 0.04      | -0.06 | -0.01 | -0.02     | -0.02 | 0.00  | 0.01      | 0.02  | 0.00  |
| 3              | 6  | 0.01      | 0.04  | 0.00  | -0.03     | 0.05  | 0.00  | 0.06      | -0.03 | 0.00  |
| 4              | 6  | 0.04      | -0.02 | 0.02  | 0.08      | -0.07 | 0.04  | -0.18     | 0.15  | -0.09 |
| 5              | 6  | 0.14      | 0.05  | 0.00  | -0.01     | -0.06 | -0.01 | -0.02     | -0.08 | -0.01 |
| 6              | 6  | -0.27     | 0.40  | 0.06  | -0.05     | 0.07  | 0.02  | -0.06     | 0.08  | 0.01  |
| 7              | 6  | 0.02      | -0.03 | 0.00  | -0.03     | 0.01  | 0.00  | -0.01     | 0.07  | 0.00  |
| 8              | 1  | -0.14     | 0.14  | 0.01  | 0.13      | -0.07 | 0.00  | -0.20     | 0.17  | 0.00  |
| 9              | 8  | 0.01      | 0.01  | -0.01 | 0.00      | 0.02  | -0.02 | 0.01      | -0.03 | 0.03  |
| 10             | 8  | -0.02     | 0.00  | 0.01  | -0.04     | 0.02  | 0.02  | 0.07      | -0.05 | 0.00  |
| 11             | 6  | -0.04     | 0.07  | 0.01  | -0.01     | -0.08 | 0.00  | -0.03     | -0.04 | 0.00  |
| 12             | 6  | -0.02     | -0.19 | -0.10 | 0.02      | 0.21  | 0.11  | 0.01      | 0.14  | 0.07  |
| 13             | 8  | -0.05     | -0.19 | 0.17  | -0.01     | -0.03 | 0.02  | -0.01     | -0.04 | 0.04  |
| 14             | 8  | 0.23      | -0.07 | -0.21 | 0.04      | -0.02 | -0.04 | 0.05      | -0.01 | -0.04 |

|    |   |       |       |       |       |       |       |       |       |       |
|----|---|-------|-------|-------|-------|-------|-------|-------|-------|-------|
| 15 | 1 | -0.11 | -0.09 | 0.00  | 0.28  | 0.16  | -0.01 | -0.11 | 0.03  | 0.00  |
| 16 | 1 | 0.01  | 0.14  | -0.22 | -0.09 | 0.23  | -0.56 | 0.16  | -0.29 | 0.75  |
| 17 | 1 | -0.04 | 0.02  | -0.01 | 0.03  | 0.31  | 0.02  | -0.02 | 0.14  | 0.01  |
| 18 | 8 | -0.04 | 0.02  | 0.04  | 0.03  | -0.03 | -0.03 | 0.02  | -0.02 | -0.02 |
| 19 | 8 | 0.03  | 0.06  | 0.01  | -0.03 | -0.07 | -0.02 | -0.01 | -0.04 | -0.01 |
| 20 | 1 | -0.21 | 0.29  | 0.46  | 0.18  | -0.27 | -0.43 | 0.09  | -0.14 | -0.22 |
| 21 | 8 | 0.01  | 0.00  | 0.00  | 0.01  | 0.00  | 0.00  | -0.01 | 0.00  | 0.00  |
| 22 | 1 | -0.02 | -0.07 | -0.02 | -0.02 | 0.03  | 0.03  | 0.02  | -0.07 | -0.06 |
| 23 | 1 | -0.04 | -0.02 | -0.03 | -0.03 | -0.04 | -0.04 | 0.03  | 0.05  | 0.04  |

|                | 49<br>A   | 50<br>A   | 51<br>A   |
|----------------|-----------|-----------|-----------|
| Frequencies -- | 1471.9108 | 1507.7199 | 1645.1571 |
| Red. masses -- | 4.0322    | 2.8423    | 7.3551    |
| Frc consts --  | 5.1471    | 3.8068    | 11.7288   |
| IR Inten --    | 14.0555   | 21.8650   | 10.1564   |
| Raman Activ -- | 4.8163    | 0.6270    | 18.8633   |
| Depolar (P) -- | 0.1933    | 0.5394    | 0.7398    |
| Depolar (U) -- | 0.3240    | 0.7008    | 0.8505    |

| Atom | AN | X     | Y     | Z     | X     | Y     | Z     | X     | Y     | Z     |
|------|----|-------|-------|-------|-------|-------|-------|-------|-------|-------|
| 1    | 6  | -0.15 | -0.22 | 0.00  | -0.13 | 0.10  | 0.00  | 0.20  | 0.14  | 0.00  |
| 2    | 6  | -0.10 | 0.24  | 0.01  | 0.11  | 0.03  | 0.00  | -0.33 | -0.13 | 0.00  |
| 3    | 6  | 0.14  | -0.03 | 0.00  | 0.02  | -0.14 | 0.00  | -0.26 | 0.01  | 0.01  |
| 4    | 6  | 0.05  | -0.01 | 0.05  | 0.06  | -0.05 | 0.03  | -0.02 | 0.01  | -0.03 |
| 5    | 6  | 0.26  | -0.07 | -0.01 | -0.05 | -0.17 | -0.01 | 0.26  | 0.04  | 0.00  |
| 6    | 6  | 0.05  | -0.08 | -0.01 | -0.02 | 0.00  | -0.01 | 0.01  | -0.01 | 0.05  |
| 7    | 6  | -0.04 | 0.10  | 0.00  | 0.18  | 0.07  | 0.00  | 0.38  | 0.17  | -0.01 |
| 8    | 1  | -0.46 | 0.43  | 0.00  | -0.34 | 0.10  | 0.00  | 0.08  | -0.28 | 0.00  |
| 9    | 8  | 0.02  | 0.01  | -0.02 | 0.00  | 0.01  | -0.01 | -0.02 | -0.01 | 0.02  |
| 10   | 8  | -0.02 | 0.01  | -0.01 | -0.01 | 0.01  | 0.00  | 0.00  | 0.00  | 0.00  |
| 11   | 6  | -0.08 | -0.08 | 0.00  | -0.08 | 0.13  | 0.01  | -0.17 | -0.20 | 0.00  |
| 12   | 6  | -0.01 | -0.01 | -0.04 | 0.01  | 0.08  | 0.04  | 0.01  | -0.01 | -0.03 |
| 13   | 8  | 0.00  | 0.02  | -0.01 | 0.00  | -0.01 | 0.01  | 0.00  | 0.02  | -0.02 |
| 14   | 8  | -0.02 | 0.01  | 0.02  | 0.00  | 0.00  | 0.00  | 0.01  | -0.01 | -0.01 |
| 15   | 1  | -0.09 | 0.10  | 0.00  | -0.61 | -0.29 | 0.01  | -0.46 | -0.20 | 0.01  |
| 16   | 1  | -0.04 | 0.02  | -0.12 | -0.02 | 0.06  | -0.13 | 0.01  | 0.00  | 0.03  |
| 17   | 1  | -0.04 | 0.54  | 0.03  | -0.15 | -0.44 | -0.02 | -0.16 | 0.26  | 0.02  |
| 18   | 8  | -0.03 | -0.01 | 0.02  | 0.01  | -0.01 | -0.01 | -0.03 | -0.01 | 0.02  |
| 19   | 8  | 0.01  | 0.01  | 0.00  | 0.00  | -0.02 | -0.01 | 0.00  | 0.00  | 0.00  |
| 20   | 1  | 0.00  | 0.02  | 0.06  | 0.04  | -0.05 | -0.09 | 0.01  | 0.00  | 0.02  |
| 21   | 8  | 0.00  | 0.00  | 0.00  | 0.00  | 0.00  | 0.00  | 0.00  | 0.00  | 0.00  |
| 22   | 1  | 0.00  | 0.02  | 0.01  | -0.01 | 0.01  | 0.02  | 0.01  | 0.00  | -0.03 |
| 23   | 1  | 0.00  | 0.00  | 0.00  | -0.01 | -0.01 | -0.01 | 0.02  | 0.00  | 0.01  |

|                | 52<br>A   | 53<br>A   | 54<br>A   |
|----------------|-----------|-----------|-----------|
| Frequencies -- | 1664.5125 | 1696.1064 | 1729.9781 |
| Red. masses -- | 6.5067    | 1.0938    | 10.6006   |
| Frc consts --  | 10.6215   | 1.8539    | 18.6923   |
| IR Inten --    | 9.3714    | 40.5394   | 556.0511  |
| Raman Activ -- | 32.6496   | 0.5858    | 12.2737   |
| Depolar (P) -- | 0.7477    | 0.6102    | 0.7417    |
| Depolar (U) -- | 0.8556    | 0.7580    | 0.8517    |

| Atom | AN | X     | Y     | Z     | X    | Y    | Z     | X     | Y     | Z     |
|------|----|-------|-------|-------|------|------|-------|-------|-------|-------|
| 1    | 6  | 0.13  | -0.29 | 0.00  | 0.00 | 0.00 | 0.00  | -0.02 | 0.00  | 0.00  |
| 2    | 6  | -0.07 | 0.15  | 0.00  | 0.00 | 0.00 | 0.00  | 0.05  | 0.03  | -0.01 |
| 3    | 6  | -0.24 | 0.26  | 0.01  | 0.00 | 0.00 | 0.00  | 0.02  | 0.00  | 0.00  |
| 4    | 6  | -0.04 | 0.04  | -0.01 | 0.00 | 0.01 | -0.01 | 0.00  | 0.02  | -0.01 |
| 5    | 6  | 0.12  | -0.27 | -0.02 | 0.00 | 0.00 | 0.00  | -0.02 | -0.01 | 0.00  |
| 6    | 6  | 0.01  | -0.02 | 0.00  | 0.02 | 0.01 | -0.02 | -0.41 | -0.31 | 0.58  |
| 7    | 6  | 0.06  | -0.17 | 0.00  | 0.00 | 0.00 | 0.00  | -0.01 | 0.00  | 0.00  |
| 8    | 1  | 0.42  | -0.23 | -0.01 | 0.00 | 0.00 | 0.00  | -0.02 | 0.02  | 0.00  |





|    |   |       |       |       |       |       |      |       |       |       |
|----|---|-------|-------|-------|-------|-------|------|-------|-------|-------|
| 3  | 6 | -0.03 | -0.04 | 0.00  | -0.02 | -0.02 | 0.00 | 0.00  | 0.00  | 0.00  |
| 4  | 6 | 0.00  | 0.00  | 0.00  | 0.00  | 0.00  | 0.00 | 0.00  | 0.00  | 0.00  |
| 5  | 6 | 0.00  | 0.00  | 0.00  | 0.00  | 0.00  | 0.00 | 0.00  | 0.00  | 0.00  |
| 6  | 6 | 0.00  | 0.00  | 0.00  | 0.00  | 0.00  | 0.00 | 0.01  | 0.00  | -0.01 |
| 7  | 6 | 0.02  | -0.02 | 0.00  | 0.03  | -0.06 | 0.00 | 0.00  | 0.00  | 0.00  |
| 8  | 1 | 0.37  | 0.50  | -0.01 | 0.20  | 0.27  | 0.00 | 0.00  | 0.01  | 0.00  |
| 9  | 8 | 0.00  | 0.00  | 0.00  | 0.00  | 0.00  | 0.00 | 0.00  | 0.00  | 0.00  |
| 10 | 8 | 0.00  | 0.00  | 0.00  | 0.00  | 0.00  | 0.00 | -0.01 | 0.00  | 0.00  |
| 11 | 6 | -0.06 | 0.01  | 0.00  | 0.05  | 0.00  | 0.00 | 0.00  | 0.00  | 0.00  |
| 12 | 6 | 0.00  | 0.00  | 0.00  | 0.00  | 0.00  | 0.00 | 0.00  | 0.00  | 0.00  |
| 13 | 8 | 0.00  | 0.00  | 0.00  | 0.00  | 0.00  | 0.00 | 0.00  | 0.00  | 0.00  |
| 14 | 8 | 0.00  | 0.00  | 0.00  | 0.00  | 0.00  | 0.00 | -0.01 | 0.00  | 0.00  |
| 15 | 1 | -0.13 | 0.28  | 0.01  | -0.29 | 0.65  | 0.02 | 0.00  | 0.00  | 0.00  |
| 16 | 1 | 0.00  | 0.00  | 0.00  | 0.00  | 0.00  | 0.00 | 0.13  | -0.06 | -0.04 |
| 17 | 1 | 0.71  | -0.06 | -0.02 | -0.60 | 0.05  | 0.02 | -0.01 | 0.00  | 0.00  |
| 18 | 8 | 0.00  | 0.00  | 0.00  | 0.00  | 0.00  | 0.00 | 0.00  | 0.00  | 0.00  |
| 19 | 8 | 0.00  | 0.00  | 0.00  | 0.00  | 0.00  | 0.00 | 0.00  | 0.00  | 0.00  |
| 20 | 1 | 0.00  | 0.00  | 0.00  | 0.00  | 0.00  | 0.00 | 0.00  | 0.00  | 0.00  |
| 21 | 8 | 0.00  | 0.00  | 0.00  | 0.00  | 0.00  | 0.00 | 0.05  | 0.00  | 0.03  |
| 22 | 1 | 0.00  | 0.00  | 0.00  | 0.01  | 0.00  | 0.01 | -0.83 | 0.04  | -0.53 |
| 23 | 1 | 0.00  | 0.00  | 0.00  | 0.00  | 0.00  | 0.00 | 0.02  | -0.03 | 0.05  |

|                |    |           |       |       |           |       |       |           |       |       |
|----------------|----|-----------|-------|-------|-----------|-------|-------|-----------|-------|-------|
|                |    | 61        |       |       | 62        |       |       | 63        |       |       |
|                |    | A         |       |       | A         |       |       | A         |       |       |
| Frequencies -- |    | 3548.9336 |       |       | 3863.6176 |       |       | 3940.0062 |       |       |
| Red. masses -- |    | 1.0662    |       |       | 1.0642    |       |       | 1.0648    |       |       |
| Frc consts --  |    | 7.9120    |       |       | 9.3600    |       |       | 9.7388    |       |       |
| IR Inten --    |    | 807.8973  |       |       | 72.5934   |       |       | 37.6174   |       |       |
| Raman Activ -- |    | 101.7664  |       |       | 141.6030  |       |       | 46.8750   |       |       |
| Depolar (P) -- |    | 0.2257    |       |       | 0.2582    |       |       | 0.1830    |       |       |
| Depolar (U) -- |    | 0.3683    |       |       | 0.4104    |       |       | 0.3094    |       |       |
| Atom           | AN | X         | Y     | Z     | X         | Y     | Z     | X         | Y     | Z     |
| 1              | 6  | 0.00      | 0.00  | 0.00  | 0.00      | 0.00  | 0.00  | 0.00      | 0.00  | 0.00  |
| 2              | 6  | 0.00      | 0.00  | 0.00  | 0.00      | 0.00  | 0.00  | 0.00      | 0.00  | 0.00  |
| 3              | 6  | 0.00      | 0.00  | 0.00  | 0.00      | 0.00  | 0.00  | 0.00      | 0.00  | 0.00  |
| 4              | 6  | 0.00      | 0.00  | 0.00  | 0.00      | 0.00  | 0.00  | 0.00      | 0.00  | 0.00  |
| 5              | 6  | 0.00      | 0.00  | 0.00  | 0.00      | 0.00  | 0.00  | 0.00      | 0.00  | 0.00  |
| 6              | 6  | 0.00      | 0.00  | 0.00  | 0.00      | 0.00  | 0.00  | 0.00      | 0.00  | 0.00  |
| 7              | 6  | 0.00      | 0.00  | 0.00  | 0.00      | 0.00  | 0.00  | 0.00      | 0.00  | 0.00  |
| 8              | 1  | 0.00      | 0.00  | 0.00  | 0.00      | 0.00  | 0.00  | 0.00      | 0.00  | 0.00  |
| 9              | 8  | 0.00      | 0.00  | 0.00  | 0.00      | 0.00  | 0.00  | 0.00      | 0.00  | 0.00  |
| 10             | 8  | -0.05     | 0.03  | 0.02  | 0.00      | 0.00  | 0.00  | 0.00      | 0.00  | 0.00  |
| 11             | 6  | 0.00      | 0.00  | 0.00  | 0.00      | 0.00  | 0.00  | 0.00      | 0.00  | 0.00  |
| 12             | 6  | 0.00      | 0.00  | 0.00  | 0.00      | 0.00  | 0.00  | 0.00      | 0.00  | 0.00  |
| 13             | 8  | 0.00      | 0.00  | 0.00  | 0.00      | 0.00  | 0.00  | 0.00      | 0.00  | 0.00  |
| 14             | 8  | 0.00      | 0.00  | 0.00  | 0.00      | 0.00  | 0.00  | 0.00      | 0.00  | 0.00  |
| 15             | 1  | 0.00      | 0.00  | 0.00  | 0.00      | 0.00  | 0.00  | 0.00      | 0.00  | 0.00  |
| 16             | 1  | 0.81      | -0.49 | -0.27 | 0.00      | 0.00  | 0.00  | -0.01     | 0.01  | 0.00  |
| 17             | 1  | 0.00      | 0.00  | 0.00  | 0.00      | 0.00  | 0.00  | 0.00      | 0.00  | 0.00  |
| 18             | 8  | 0.00      | 0.00  | 0.00  | 0.00      | 0.00  | 0.00  | 0.00      | 0.00  | 0.00  |
| 19             | 8  | 0.00      | 0.00  | 0.00  | 0.04      | 0.05  | -0.01 | 0.00      | 0.00  | 0.00  |
| 20             | 1  | 0.00      | 0.00  | 0.00  | -0.58     | -0.80 | 0.12  | 0.00      | 0.00  | 0.00  |
| 21             | 8  | -0.01     | 0.00  | -0.01 | 0.00      | 0.00  | 0.00  | 0.01      | 0.04  | -0.05 |
| 22             | 1  | 0.13      | -0.01 | 0.08  | 0.00      | 0.00  | 0.00  | 0.04      | 0.02  | 0.00  |
| 23             | 1  | 0.00      | -0.01 | 0.00  | 0.00      | 0.00  | 0.00  | -0.17     | -0.62 | 0.76  |

HEM H2O

Harmonic frequencies (cm<sup>-1</sup>), IR intensities (KM/Mole), Raman scattering activities (A<sup>4</sup>/AMU), depolarization ratios for plane and unpolarized

incident light, reduced masses (AMU), force constants (mDyne/A),  
and normal coordinates:

|                |    |  | 1       |       |       | 2       |       |       | 3        |       |       |
|----------------|----|--|---------|-------|-------|---------|-------|-------|----------|-------|-------|
|                |    |  | A       |       |       | A       |       |       | A        |       |       |
| Frequencies -- |    |  | 21.7495 |       |       | 39.2740 |       |       | 59.6302  |       |       |
| Red. masses -- |    |  | 10.6412 |       |       | 6.9155  |       |       | 6.9831   |       |       |
| Frc consts --  |    |  | 0.0030  |       |       | 0.0063  |       |       | 0.0146   |       |       |
| IR Inten --    |    |  | 1.9610  |       |       | 1.3895  |       |       | 0.9815   |       |       |
| Raman Activ -- |    |  | 0.6445  |       |       | 0.1404  |       |       | 0.0999   |       |       |
| Depolar (P) -- |    |  | 0.7496  |       |       | 0.7495  |       |       | 0.7212   |       |       |
| Depolar (U) -- |    |  | 0.8569  |       |       | 0.8568  |       |       | 0.8380   |       |       |
| Atom           | AN |  | X       | Y     | Z     | X       | Y     | Z     | X        | Y     | Z     |
| 1              | 8  |  | 0.00    | 0.02  | 0.05  | 0.01    | 0.02  | 0.39  | 0.00     | 0.05  | 0.22  |
| 2              | 1  |  | 0.04    | -0.19 | 0.11  | -0.15   | 0.05  | 0.54  | -0.11    | -0.13 | 0.41  |
| 3              | 1  |  | 0.00    | 0.03  | 0.30  | 0.01    | 0.01  | 0.20  | 0.00     | 0.04  | 0.30  |
| 4              | 6  |  | 0.00    | 0.00  | -0.03 | 0.00    | 0.00  | -0.12 | 0.00     | -0.01 | -0.02 |
| 5              | 6  |  | 0.00    | 0.00  | -0.01 | 0.00    | 0.00  | -0.08 | 0.01     | -0.01 | 0.02  |
| 6              | 6  |  | 0.00    | 0.00  | -0.04 | 0.00    | 0.00  | -0.14 | 0.00     | -0.01 | 0.06  |
| 7              | 6  |  | 0.00    | 0.00  | 0.01  | 0.00    | 0.00  | -0.10 | 0.00     | -0.02 | -0.12 |
| 8              | 6  |  | 0.00    | 0.00  | 0.02  | 0.00    | 0.00  | -0.01 | 0.00     | 0.00  | 0.07  |
| 9              | 6  |  | 0.02    | 0.00  | -0.02 | 0.00    | 0.00  | -0.10 | -0.01    | -0.01 | -0.03 |
| 10             | 6  |  | 0.00    | 0.00  | 0.00  | 0.00    | 0.00  | -0.11 | -0.01    | 0.00  | 0.17  |
| 11             | 1  |  | 0.00    | 0.00  | -0.07 | 0.00    | -0.01 | -0.17 | -0.01    | -0.01 | 0.03  |
| 12             | 8  |  | 0.00    | 0.03  | 0.37  | 0.00    | -0.01 | -0.20 | -0.01    | 0.00  | 0.05  |
| 13             | 8  |  | 0.00    | -0.04 | -0.37 | -0.01   | 0.01  | 0.06  | 0.01     | -0.03 | -0.39 |
| 14             | 6  |  | 0.00    | 0.00  | 0.04  | 0.00    | 0.00  | -0.03 | 0.00     | 0.00  | 0.16  |
| 15             | 6  |  | 0.00    | 0.00  | -0.02 | 0.00    | 0.00  | 0.11  | 0.01     | 0.01  | 0.02  |
| 16             | 8  |  | 0.23    | -0.04 | -0.05 | -0.06   | -0.02 | -0.11 | -0.06    | -0.04 | -0.05 |
| 17             | 8  |  | -0.21   | 0.04  | 0.00  | 0.07    | 0.01  | -0.12 | 0.03     | 0.03  | -0.06 |
| 18             | 1  |  | 0.00    | 0.00  | 0.01  | 0.00    | 0.00  | -0.14 | -0.01    | 0.00  | 0.25  |
| 19             | 1  |  | 0.00    | -0.03 | -0.29 | -0.01   | 0.01  | 0.15  | 0.01     | -0.02 | -0.31 |
| 20             | 1  |  | 0.00    | 0.00  | 0.07  | 0.00    | 0.00  | 0.02  | -0.01    | 0.01  | 0.21  |
| 21             | 8  |  | 0.02    | 0.07  | -0.35 | 0.04    | 0.01  | 0.06  | -0.02    | -0.03 | 0.21  |
| 22             | 8  |  | -0.04   | -0.07 | 0.35  | -0.03   | -0.01 | 0.30  | 0.05     | 0.05  | -0.27 |
| 23             | 1  |  | -0.03   | -0.05 | 0.28  | -0.02   | 0.00  | 0.37  | 0.04     | 0.04  | -0.27 |
| 24             | 1  |  | -0.19   | 0.03  | -0.01 | 0.07    | 0.01  | -0.14 | 0.01     | 0.03  | -0.09 |
|                |    |  | 4       |       |       | 5       |       |       | 6        |       |       |
|                |    |  | A       |       |       | A       |       |       | A        |       |       |
| Frequencies -- |    |  | 85.6143 |       |       | 90.7158 |       |       | 152.3458 |       |       |
| Red. masses -- |    |  | 8.1127  |       |       | 5.9929  |       |       | 8.5829   |       |       |
| Frc consts --  |    |  | 0.0350  |       |       | 0.0291  |       |       | 0.1174   |       |       |
| IR Inten --    |    |  | 3.5635  |       |       | 5.4212  |       |       | 2.8234   |       |       |
| Raman Activ -- |    |  | 1.5031  |       |       | 0.3454  |       |       | 1.7312   |       |       |
| Depolar (P) -- |    |  | 0.7459  |       |       | 0.7496  |       |       | 0.7480   |       |       |
| Depolar (U) -- |    |  | 0.8545  |       |       | 0.8569  |       |       | 0.8559   |       |       |
| Atom           | AN |  | X       | Y     | Z     | X       | Y     | Z     | X        | Y     | Z     |
| 1              | 8  |  | 0.07    | -0.15 | -0.09 | -0.22   | 0.35  | -0.05 | 0.03     | -0.02 | 0.00  |
| 2              | 1  |  | 0.22    | -0.25 | -0.18 | -0.20   | 0.53  | -0.16 | -0.01    | 0.07  | 0.00  |
| 3              | 1  |  | 0.14    | -0.07 | 0.07  | -0.40   | 0.17  | 0.03  | 0.05     | -0.01 | -0.15 |
| 4              | 6  |  | 0.01    | 0.04  | 0.04  | -0.01   | -0.10 | 0.02  | 0.01     | -0.02 | -0.10 |
| 5              | 6  |  | 0.00    | 0.02  | 0.04  | 0.02    | -0.06 | 0.02  | 0.01     | -0.02 | -0.04 |
| 6              | 6  |  | 0.02    | 0.03  | -0.08 | -0.05   | -0.09 | -0.02 | 0.01     | -0.02 | -0.09 |
| 7              | 6  |  | 0.01    | 0.03  | 0.16  | -0.02   | -0.08 | 0.06  | 0.01     | 0.00  | -0.08 |
| 8              | 6  |  | 0.00    | 0.00  | -0.01 | 0.00    | -0.01 | 0.00  | 0.01     | 0.00  | 0.06  |
| 9              | 6  |  | -0.04   | 0.02  | -0.10 | 0.08    | -0.07 | -0.03 | 0.00     | -0.01 | -0.02 |
| 10             | 6  |  | 0.03    | 0.01  | -0.19 | -0.07   | -0.05 | -0.06 | 0.00     | -0.01 | 0.02  |
| 11             | 1  |  | 0.03    | 0.04  | -0.10 | -0.07   | -0.12 | -0.01 | 0.00     | -0.02 | -0.13 |
| 12             | 8  |  | 0.04    | 0.04  | 0.32  | -0.08   | -0.07 | 0.09  | -0.01    | -0.01 | -0.17 |
| 13             | 8  |  | -0.01   | 0.01  | 0.06  | 0.03    | -0.04 | 0.04  | 0.01     | 0.02  | 0.10  |
| 14             | 6  |  | 0.02    | 0.00  | -0.13 | -0.04   | -0.01 | -0.05 | 0.00     | 0.00  | 0.10  |

|    |   |       |       |       |       |       |       |       |       |       |
|----|---|-------|-------|-------|-------|-------|-------|-------|-------|-------|
| 15 | 6 | -0.01 | -0.02 | 0.11  | 0.05  | 0.05  | 0.02  | 0.03  | 0.02  | 0.08  |
| 16 | 8 | -0.08 | -0.15 | -0.20 | 0.11  | -0.13 | -0.06 | 0.36  | -0.03 | -0.04 |
| 17 | 8 | -0.05 | 0.20  | -0.20 | 0.09  | -0.03 | -0.05 | -0.49 | 0.01  | 0.04  |
| 18 | 1 | 0.04  | 0.01  | -0.31 | -0.11 | -0.04 | -0.10 | -0.01 | -0.01 | 0.05  |
| 19 | 1 | 0.01  | -0.02 | 0.06  | -0.01 | 0.03  | 0.04  | 0.01  | 0.02  | 0.11  |
| 20 | 1 | 0.02  | -0.01 | -0.19 | -0.06 | 0.03  | -0.07 | 0.00  | 0.00  | 0.19  |
| 21 | 8 | -0.03 | -0.05 | 0.29  | 0.13  | 0.04  | 0.07  | 0.03  | 0.00  | 0.19  |
| 22 | 8 | 0.00  | 0.00  | 0.00  | 0.02  | 0.13  | 0.00  | 0.03  | 0.07  | -0.07 |
| 23 | 1 | -0.01 | -0.02 | 0.10  | 0.05  | 0.17  | 0.02  | 0.04  | 0.07  | -0.05 |
| 24 | 1 | -0.08 | 0.18  | -0.35 | 0.12  | -0.04 | -0.10 | -0.60 | 0.03  | 0.08  |

|                |  |          |  |   |  |          |  |  |  |          |
|----------------|--|----------|--|---|--|----------|--|--|--|----------|
|                |  | 7        |  | 8 |  | 9        |  |  |  |          |
|                |  | A        |  | A |  | A        |  |  |  |          |
| Frequencies -- |  | 168.1038 |  |   |  | 169.9075 |  |  |  | 183.2099 |
| Red. masses -- |  | 6.6738   |  |   |  | 7.7652   |  |  |  | 5.2673   |
| Frc consts --  |  | 0.1111   |  |   |  | 0.1321   |  |  |  | 0.1042   |
| IR Inten --    |  | 2.3987   |  |   |  | 0.9194   |  |  |  | 1.6729   |
| Raman Activ -- |  | 1.5019   |  |   |  | 0.5646   |  |  |  | 0.9048   |
| Depolar (P) -- |  | 0.7492   |  |   |  | 0.7391   |  |  |  | 0.7443   |
| Depolar (U) -- |  | 0.8566   |  |   |  | 0.8500   |  |  |  | 0.8534   |

| Atom | AN | X     | Y     | Z     | X     | Y     | Z     | X     | Y     | Z     |
|------|----|-------|-------|-------|-------|-------|-------|-------|-------|-------|
| 1    | 8  | 0.02  | 0.01  | 0.01  | -0.20 | -0.04 | 0.01  | 0.25  | 0.09  | 0.00  |
| 2    | 1  | -0.11 | 0.01  | 0.15  | -0.17 | 0.02  | -0.05 | 0.02  | -0.02 | 0.28  |
| 3    | 1  | 0.01  | -0.01 | -0.09 | -0.25 | -0.09 | 0.02  | 0.29  | 0.11  | -0.14 |
| 4    | 6  | 0.01  | -0.01 | 0.12  | -0.03 | 0.06  | -0.01 | -0.04 | -0.01 | 0.18  |
| 5    | 6  | 0.01  | 0.00  | 0.31  | -0.01 | 0.08  | 0.03  | -0.04 | -0.01 | 0.07  |
| 6    | 6  | 0.00  | -0.02 | -0.15 | -0.01 | 0.06  | -0.05 | -0.05 | 0.00  | 0.24  |
| 7    | 6  | 0.00  | -0.02 | -0.02 | -0.02 | 0.01  | -0.02 | -0.03 | 0.02  | 0.00  |
| 8    | 6  | 0.01  | 0.00  | 0.26  | -0.01 | 0.06  | 0.05  | -0.05 | -0.01 | -0.10 |
| 9    | 6  | -0.02 | -0.01 | 0.16  | 0.16  | 0.06  | 0.00  | 0.03  | -0.03 | 0.03  |
| 10   | 6  | 0.00  | -0.01 | -0.19 | 0.00  | 0.05  | -0.03 | -0.05 | 0.00  | -0.02 |
| 11   | 1  | 0.00  | -0.03 | -0.36 | 0.00  | 0.07  | -0.10 | -0.05 | -0.01 | 0.40  |
| 12   | 8  | -0.01 | -0.03 | -0.15 | 0.03  | 0.00  | -0.03 | -0.05 | 0.00  | -0.12 |
| 13   | 8  | 0.01  | -0.01 | -0.03 | -0.06 | -0.02 | 0.01  | 0.01  | 0.04  | -0.10 |
| 14   | 6  | 0.00  | 0.00  | 0.05  | 0.01  | 0.06  | 0.04  | -0.05 | -0.01 | -0.25 |
| 15   | 6  | 0.02  | 0.02  | 0.02  | -0.11 | -0.07 | 0.03  | -0.06 | -0.01 | -0.01 |
| 16   | 8  | -0.06 | -0.23 | 0.04  | 0.36  | 0.03  | -0.02 | 0.15  | -0.09 | 0.00  |
| 17   | 8  | -0.02 | 0.24  | 0.04  | 0.21  | 0.09  | -0.01 | 0.02  | 0.02  | 0.01  |
| 18   | 1  | -0.01 | -0.02 | -0.43 | 0.00  | 0.05  | -0.06 | -0.05 | 0.00  | -0.07 |
| 19   | 1  | 0.01  | -0.01 | -0.08 | -0.04 | -0.06 | 0.02  | -0.01 | 0.06  | -0.17 |
| 20   | 1  | 0.00  | 0.00  | -0.02 | 0.02  | 0.05  | 0.05  | -0.05 | -0.01 | -0.47 |
| 21   | 8  | -0.01 | 0.06  | -0.18 | -0.30 | -0.07 | 0.06  | -0.04 | -0.03 | 0.07  |
| 22   | 8  | 0.05  | 0.00  | -0.07 | -0.01 | -0.24 | -0.04 | -0.08 | 0.01  | 0.05  |
| 23   | 1  | 0.05  | 0.02  | -0.32 | -0.12 | -0.36 | -0.05 | -0.08 | 0.01  | 0.14  |
| 24   | 1  | -0.07 | 0.21  | -0.17 | 0.49  | 0.05  | -0.07 | 0.13  | 0.00  | -0.04 |

|                |  |          |  |    |  |          |  |  |  |          |
|----------------|--|----------|--|----|--|----------|--|--|--|----------|
|                |  | 10       |  | 11 |  | 12       |  |  |  |          |
|                |  | A        |  | A  |  | A        |  |  |  |          |
| Frequencies -- |  | 187.0155 |  |    |  | 201.4397 |  |  |  | 257.6152 |
| Red. masses -- |  | 5.1730   |  |    |  | 6.7406   |  |  |  | 1.1180   |
| Frc consts --  |  | 0.1066   |  |    |  | 0.1612   |  |  |  | 0.0437   |
| IR Inten --    |  | 1.0684   |  |    |  | 18.7280  |  |  |  | 128.5121 |
| Raman Activ -- |  | 0.6379   |  |    |  | 0.2912   |  |  |  | 0.0926   |
| Depolar (P) -- |  | 0.7195   |  |    |  | 0.4571   |  |  |  | 0.7114   |
| Depolar (U) -- |  | 0.8369   |  |    |  | 0.6274   |  |  |  | 0.8314   |

| Atom | AN | X     | Y     | Z     | X     | Y     | Z     | X     | Y    | Z     |
|------|----|-------|-------|-------|-------|-------|-------|-------|------|-------|
| 1    | 8  | 0.32  | 0.12  | -0.03 | -0.12 | -0.20 | 0.01  | -0.03 | 0.00 | 0.05  |
| 2    | 1  | 0.35  | 0.10  | -0.05 | -0.12 | -0.46 | 0.13  | 0.64  | 0.09 | -0.65 |
| 3    | 1  | 0.38  | 0.18  | -0.02 | 0.09  | 0.03  | -0.02 | 0.10  | 0.14 | 0.34  |
| 4    | 6  | -0.04 | -0.03 | -0.12 | -0.04 | 0.03  | 0.00  | 0.00  | 0.01 | 0.01  |
| 5    | 6  | -0.05 | -0.03 | -0.03 | -0.07 | -0.05 | 0.03  | -0.01 | 0.00 | 0.01  |
| 6    | 6  | -0.06 | -0.03 | -0.19 | 0.05  | 0.02  | -0.02 | 0.00  | 0.01 | 0.02  |

|    |   |       |       |       |       |       |       |       |       |       |
|----|---|-------|-------|-------|-------|-------|-------|-------|-------|-------|
| 7  | 6 | -0.04 | 0.02  | 0.01  | -0.10 | 0.18  | -0.01 | 0.00  | 0.01  | -0.02 |
| 8  | 6 | -0.07 | 0.00  | 0.09  | -0.04 | -0.10 | 0.03  | -0.01 | -0.01 | 0.00  |
| 9  | 6 | 0.02  | -0.05 | -0.02 | 0.02  | -0.07 | 0.01  | -0.01 | -0.01 | 0.01  |
| 10 | 6 | -0.07 | -0.01 | 0.01  | 0.08  | -0.05 | 0.00  | 0.00  | 0.00  | 0.00  |
| 11 | 1 | -0.07 | -0.05 | -0.32 | 0.09  | 0.07  | -0.05 | 0.00  | 0.01  | 0.02  |
| 12 | 8 | -0.04 | 0.02  | 0.10  | -0.20 | 0.21  | 0.00  | 0.01  | 0.00  | -0.03 |
| 13 | 8 | 0.00  | 0.05  | 0.08  | -0.06 | 0.25  | -0.01 | -0.01 | 0.00  | -0.02 |
| 14 | 6 | -0.07 | 0.00  | 0.19  | 0.02  | -0.11 | 0.03  | 0.00  | -0.01 | -0.02 |
| 15 | 6 | -0.07 | 0.01  | 0.02  | 0.03  | -0.03 | 0.00  | -0.01 | 0.00  | 0.00  |
| 16 | 8 | 0.05  | -0.03 | -0.01 | 0.13  | -0.11 | -0.01 | 0.01  | -0.02 | 0.00  |
| 17 | 8 | 0.11  | -0.10 | -0.01 | 0.11  | -0.09 | 0.00  | 0.00  | 0.00  | 0.00  |
| 18 | 1 | -0.08 | -0.01 | 0.03  | 0.14  | -0.06 | -0.02 | 0.01  | 0.00  | 0.00  |
| 19 | 1 | -0.02 | 0.08  | 0.11  | -0.06 | 0.27  | -0.03 | 0.00  | -0.02 | 0.03  |
| 20 | 1 | -0.07 | 0.00  | 0.37  | 0.04  | -0.16 | 0.04  | 0.00  | -0.01 | -0.04 |
| 21 | 8 | -0.08 | 0.02  | -0.03 | 0.19  | -0.03 | -0.02 | 0.00  | 0.00  | 0.00  |
| 22 | 8 | -0.05 | 0.00  | -0.05 | -0.04 | 0.12  | -0.02 | -0.01 | 0.01  | 0.00  |
| 23 | 1 | -0.06 | 0.01  | -0.12 | 0.04  | 0.21  | -0.06 | -0.01 | 0.02  | 0.00  |
| 24 | 1 | 0.25  | -0.11 | 0.01  | 0.36  | -0.11 | -0.02 | 0.02  | 0.00  | -0.01 |

| 13             |          |       |       | 14    |          |       |       | 15    |          |       |  |  |
|----------------|----------|-------|-------|-------|----------|-------|-------|-------|----------|-------|--|--|
| A              |          |       |       | A     |          |       |       | A     |          |       |  |  |
| Frequencies -- | 285.5712 |       |       |       | 302.7144 |       |       |       | 358.5527 |       |  |  |
| Red. masses -- | 5.3863   |       |       |       | 9.7603   |       |       |       | 5.1087   |       |  |  |
| Frc consts --  | 0.2588   |       |       |       | 0.5270   |       |       |       | 0.3870   |       |  |  |
| IR Inten --    | 47.5487  |       |       |       | 1.5542   |       |       |       | 6.3156   |       |  |  |
| Raman Activ -- | 2.6586   |       |       |       | 2.0303   |       |       |       | 1.1682   |       |  |  |
| Depolar (P) -- | 0.7172   |       |       |       | 0.7326   |       |       |       | 0.2290   |       |  |  |
| Depolar (U) -- | 0.8353   |       |       |       | 0.8456   |       |       |       | 0.3726   |       |  |  |
| Atom           | AN       | X     | Y     | Z     | X        | Y     | Z     | X     | Y        | Z     |  |  |
| 1              | 8        | 0.04  | 0.07  | -0.01 | -0.11    | -0.03 | 0.00  | 0.04  | 0.00     | 0.03  |  |  |
| 2              | 1        | -0.17 | 0.37  | 0.06  | -0.23    | 0.02  | 0.10  | 0.04  | 0.34     | -0.14 |  |  |
| 3              | 1        | -0.20 | -0.19 | -0.13 | -0.21    | -0.13 | -0.05 | -0.03 | -0.09    | -0.20 |  |  |
| 4              | 6        | -0.05 | 0.13  | -0.01 | 0.12     | 0.06  | 0.04  | -0.04 | 0.05     | 0.18  |  |  |
| 5              | 6        | -0.14 | 0.04  | 0.02  | 0.00     | -0.08 | 0.01  | -0.03 | 0.02     | -0.01 |  |  |
| 6              | 6        | 0.05  | 0.12  | -0.03 | 0.11     | 0.08  | 0.03  | -0.01 | 0.05     | 0.12  |  |  |
| 7              | 6        | 0.01  | 0.02  | 0.00  | 0.18     | 0.09  | 0.01  | -0.07 | 0.03     | 0.06  |  |  |
| 8              | 6        | -0.09 | -0.12 | 0.01  | -0.07    | 0.07  | 0.04  | 0.01  | 0.00     | 0.23  |  |  |
| 9              | 6        | -0.11 | 0.05  | 0.02  | -0.03    | -0.21 | -0.02 | -0.04 | 0.01     | -0.15 |  |  |
| 10             | 6        | 0.11  | -0.02 | 0.01  | 0.07     | 0.13  | -0.04 | 0.01  | 0.01     | -0.20 |  |  |
| 11             | 1        | 0.10  | 0.20  | -0.06 | 0.07     | 0.03  | 0.03  | 0.01  | 0.07     | 0.15  |  |  |
| 12             | 8        | 0.25  | -0.03 | 0.00  | 0.28     | 0.07  | -0.01 | -0.02 | 0.01     | -0.02 |  |  |
| 13             | 8        | -0.13 | -0.14 | 0.00  | 0.14     | 0.04  | -0.01 | -0.13 | -0.04    | -0.05 |  |  |
| 14             | 6        | 0.02  | -0.13 | 0.03  | 0.00     | 0.07  | -0.01 | 0.01  | 0.00     | 0.04  |  |  |
| 15             | 6        | -0.07 | -0.09 | -0.01 | -0.13    | 0.14  | 0.02  | 0.06  | 0.01     | 0.11  |  |  |
| 16             | 8        | 0.06  | 0.03  | 0.01  | -0.05    | -0.28 | -0.05 | 0.01  | 0.14     | -0.08 |  |  |
| 17             | 8        | 0.02  | 0.06  | 0.00  | -0.04    | -0.33 | 0.02  | -0.03 | -0.21    | -0.06 |  |  |
| 18             | 1        | 0.24  | -0.04 | 0.03  | 0.08     | 0.13  | -0.11 | 0.04  | 0.00     | -0.52 |  |  |
| 19             | 1        | -0.08 | -0.27 | 0.04  | 0.16     | 0.02  | -0.02 | -0.10 | -0.12    | -0.01 |  |  |
| 20             | 1        | 0.05  | -0.22 | 0.05  | 0.04     | -0.03 | -0.04 | 0.01  | -0.01    | -0.01 |  |  |
| 21             | 8        | 0.14  | -0.10 | -0.01 | -0.25    | 0.15  | 0.00  | 0.03  | 0.04     | -0.02 |  |  |
| 22             | 8        | -0.18 | 0.11  | -0.02 | -0.13    | 0.12  | 0.00  | 0.15  | -0.06    | -0.02 |  |  |
| 23             | 1        | -0.06 | 0.24  | -0.03 | -0.12    | 0.13  | -0.02 | 0.09  | -0.10    | -0.28 |  |  |
| 24             | 1        | 0.31  | 0.02  | -0.05 | -0.04    | -0.30 | 0.19  | 0.06  | -0.18    | 0.16  |  |  |

| 16             |          | 17 |          | 18 |          |  |
|----------------|----------|----|----------|----|----------|--|
| A              |          | A  |          | A  |          |  |
| Frequencies -- | 364.7360 |    | 386.1403 |    | 415.4099 |  |
| Red. masses -- | 1.3734   |    | 4.8129   |    | 6.8224   |  |
| Frc consts --  | 0.1076   |    | 0.4228   |    | 0.6937   |  |
| IR Inten --    | 68.3696  |    | 33.2210  |    | 3.6415   |  |
| Raman Activ -- | 0.5819   |    | 2.8792   |    | 3.2406   |  |
| Depolar (P) -- | 0.4206   |    | 0.1505   |    | 0.5889   |  |

| Depolar (U) -- |    | 0.5921 |       |       | 0.2617 |       |       | 0.7413 |       |       |
|----------------|----|--------|-------|-------|--------|-------|-------|--------|-------|-------|
| Atom           | AN | X      | Y     | Z     | X      | Y     | Z     | X      | Y     | Z     |
| 1              | 8  | 0.03   | -0.05 | 0.05  | -0.01  | -0.08 | 0.05  | 0.06   | 0.05  | -0.02 |
| 2              | 1  | -0.05  | 0.70  | -0.23 | 0.00   | 0.44  | -0.20 | 0.06   | -0.13 | 0.07  |
| 3              | 1  | -0.09  | -0.20 | -0.56 | 0.02   | -0.07 | -0.48 | 0.03   | 0.02  | 0.22  |
| 4              | 6  | 0.00   | 0.00  | -0.05 | 0.04   | -0.09 | 0.09  | -0.02  | -0.03 | -0.07 |
| 5              | 6  | 0.01   | 0.00  | 0.00  | 0.03   | -0.02 | -0.01 | 0.03   | 0.01  | -0.02 |
| 6              | 6  | 0.00   | 0.00  | -0.01 | 0.07   | -0.10 | 0.03  | 0.24   | -0.03 | 0.01  |
| 7              | 6  | -0.02  | 0.02  | -0.02 | 0.06   | -0.08 | 0.04  | -0.17  | -0.05 | -0.02 |
| 8              | 6  | 0.01   | 0.01  | -0.04 | -0.02  | -0.03 | 0.07  | 0.04   | 0.05  | -0.02 |
| 9              | 6  | 0.01   | -0.02 | 0.03  | 0.05   | 0.06  | -0.06 | 0.07   | -0.02 | 0.02  |
| 10             | 6  | -0.01  | 0.01  | 0.04  | 0.07   | -0.08 | -0.08 | 0.28   | -0.03 | 0.04  |
| 11             | 1  | -0.01  | 0.00  | 0.01  | 0.09   | -0.08 | 0.01  | 0.33   | 0.09  | 0.05  |
| 12             | 8  | -0.02  | 0.03  | 0.03  | -0.11  | -0.05 | 0.01  | -0.19  | -0.06 | 0.01  |
| 13             | 8  | -0.04  | 0.01  | -0.03 | 0.20   | 0.04  | -0.05 | -0.25  | -0.14 | 0.03  |
| 14             | 6  | 0.00   | 0.02  | -0.03 | 0.06   | -0.06 | 0.06  | 0.26   | 0.00  | -0.05 |
| 15             | 6  | 0.02   | 0.01  | -0.01 | -0.11  | -0.02 | 0.02  | -0.03  | 0.11  | 0.01  |
| 16             | 8  | -0.01  | -0.06 | 0.01  | 0.01   | 0.18  | 0.01  | -0.02  | -0.06 | 0.00  |
| 17             | 8  | 0.01   | 0.01  | 0.02  | 0.01   | 0.06  | -0.05 | 0.01   | 0.00  | 0.02  |
| 18             | 1  | -0.02  | 0.02  | 0.11  | 0.04   | -0.08 | -0.21 | 0.24   | -0.02 | 0.10  |
| 19             | 1  | -0.01  | -0.04 | 0.20  | 0.16   | 0.16  | 0.10  | -0.22  | -0.23 | -0.02 |
| 20             | 1  | 0.00   | 0.02  | -0.03 | 0.07   | -0.09 | 0.08  | 0.31   | -0.12 | -0.07 |
| 21             | 8  | 0.00   | 0.01  | 0.01  | -0.09  | -0.01 | -0.02 | -0.16  | 0.13  | 0.00  |
| 22             | 8  | 0.04   | -0.02 | 0.01  | -0.21  | 0.13  | -0.01 | -0.01  | 0.10  | 0.01  |
| 23             | 1  | 0.01   | -0.05 | 0.04  | -0.08  | 0.28  | -0.05 | -0.02  | 0.10  | 0.02  |
| 24             | 1  | -0.01  | 0.01  | 0.00  | -0.11  | 0.07  | -0.06 | -0.21  | 0.02  | 0.04  |

|                |    | 19       |       |       | 20       |       |       | 21       |       |       |
|----------------|----|----------|-------|-------|----------|-------|-------|----------|-------|-------|
|                |    | A        |       |       | A        |       |       | A        |       |       |
| Frequencies -- |    | 451.8998 |       |       | 510.2872 |       |       | 534.6194 |       |       |
| Red. masses -- |    | 3.9234   |       |       | 1.9306   |       |       | 7.1356   |       |       |
| Frc consts --  |    | 0.4721   |       |       | 0.2962   |       |       | 1.2016   |       |       |
| IR Inten --    |    | 4.9023   |       |       | 39.4496  |       |       | 38.7950  |       |       |
| Raman Activ -- |    | 0.7993   |       |       | 1.2566   |       |       | 4.8504   |       |       |
| Depolar (P) -- |    | 0.4561   |       |       | 0.7233   |       |       | 0.2002   |       |       |
| Depolar (U) -- |    | 0.6265   |       |       | 0.8395   |       |       | 0.3337   |       |       |
| Atom           | AN | X        | Y     | Z     | X        | Y     | Z     | X        | Y     | Z     |
| 1              | 8  | 0.01     | 0.00  | 0.01  | 0.01     | 0.01  | -0.01 | 0.00     | -0.01 | 0.01  |
| 2              | 1  | 0.04     | 0.06  | -0.05 | -0.01    | 0.01  | 0.01  | 0.03     | -0.05 | -0.01 |
| 3              | 1  | 0.02     | 0.01  | -0.04 | -0.05    | -0.05 | 0.06  | 0.13     | 0.13  | -0.12 |
| 4              | 6  | 0.00     | 0.02  | 0.28  | 0.01     | -0.02 | -0.01 | 0.00     | 0.12  | -0.08 |
| 5              | 6  | 0.03     | 0.02  | 0.02  | 0.07     | -0.01 | 0.00  | 0.02     | 0.15  | 0.05  |
| 6              | 6  | 0.01     | 0.02  | -0.14 | -0.02    | -0.04 | 0.03  | 0.01     | 0.21  | 0.00  |
| 7              | 6  | -0.02    | 0.00  | 0.14  | -0.01    | 0.06  | -0.02 | 0.01     | -0.16 | -0.03 |
| 8              | 6  | 0.02     | 0.04  | -0.22 | 0.03     | 0.02  | 0.04  | 0.03     | 0.13  | 0.10  |
| 9              | 6  | 0.03     | -0.01 | -0.01 | 0.14     | -0.02 | -0.01 | 0.00     | 0.04  | -0.01 |
| 10             | 6  | 0.01     | 0.05  | -0.03 | -0.04    | 0.00  | -0.02 | 0.04     | 0.25  | 0.03  |
| 11             | 1  | 0.01     | 0.01  | -0.41 | -0.05    | -0.07 | 0.05  | 0.01     | 0.22  | 0.02  |
| 12             | 8  | -0.04    | -0.01 | -0.06 | 0.05     | 0.06  | 0.00  | -0.22    | -0.12 | 0.03  |
| 13             | 8  | -0.04    | -0.03 | -0.05 | -0.09    | 0.01  | 0.00  | 0.13     | -0.08 | 0.02  |
| 14             | 6  | 0.02     | 0.06  | 0.17  | -0.01    | 0.04  | 0.01  | 0.05     | 0.20  | -0.05 |
| 15             | 6  | 0.01     | 0.00  | -0.16 | -0.02    | -0.07 | 0.01  | -0.05    | -0.14 | 0.03  |
| 16             | 8  | -0.01    | -0.03 | -0.02 | -0.01    | 0.00  | 0.00  | -0.02    | -0.11 | -0.10 |
| 17             | 8  | -0.01    | -0.04 | 0.01  | 0.06     | -0.01 | 0.00  | -0.01    | -0.11 | 0.07  |
| 18             | 1  | -0.01    | 0.05  | -0.09 | -0.08    | 0.01  | -0.06 | 0.04     | 0.25  | 0.04  |
| 19             | 1  | -0.03    | -0.06 | -0.15 | -0.05    | -0.07 | 0.01  | 0.07     | 0.06  | 0.06  |
| 20             | 1  | 0.02     | 0.07  | 0.45  | -0.03    | 0.09  | -0.02 | 0.06     | 0.20  | -0.19 |
| 21             | 8  | 0.03     | -0.05 | 0.04  | 0.03     | -0.07 | -0.01 | 0.17     | -0.16 | -0.02 |
| 22             | 8  | -0.03    | -0.01 | 0.00  | -0.08    | 0.01  | -0.01 | -0.14    | -0.05 | -0.01 |
| 23             | 1  | -0.06    | -0.08 | 0.53  | 0.00     | 0.10  | -0.07 | -0.02    | 0.11  | -0.37 |
| 24             | 1  | -0.10    | -0.02 | 0.07  | -0.92    | 0.11  | 0.10  | 0.06     | -0.08 | 0.33  |

|                | 22                | 23                | 24                |  |
|----------------|-------------------|-------------------|-------------------|--|
|                | A                 | A                 | A                 |  |
| Frequencies -- | 582.1818          | 584.2399          | 595.6869          |  |
| Red. masses -- | 1.9802            | 1.7888            | 1.4133            |  |
| Frc consts --  | 0.3954            | 0.3598            | 0.2955            |  |
| IR Inten --    | 43.2998           | 21.5761           | 218.2129          |  |
| Raman Activ -- | 1.3828            | 1.8297            | 4.2806            |  |
| Depolar (P) -- | 0.7446            | 0.4352            | 0.4183            |  |
| Depolar (U) -- | 0.8536            | 0.6064            | 0.5899            |  |
| Atom AN        | X Y Z             | X Y Z             | X Y Z             |  |
| 1 8            | -0.03 0.00 0.02   | 0.04 -0.01 -0.01  | -0.04 0.01 0.01   |  |
| 2 1            | 0.03 -0.08 -0.01  | -0.04 0.13 -0.01  | 0.03 -0.12 0.01   |  |
| 3 1            | 0.26 0.28 -0.28   | -0.35 -0.38 0.36  | 0.33 0.37 -0.34   |  |
| 4 6            | -0.03 0.04 0.07   | 0.03 -0.04 0.06   | 0.01 -0.03 0.02   |  |
| 5 6            | -0.06 0.01 0.07   | 0.05 0.00 0.09    | 0.04 -0.01 -0.06  |  |
| 6 6            | -0.01 0.05 -0.11  | 0.00 -0.07 -0.09  | 0.01 -0.04 0.01   |  |
| 7 6            | 0.00 -0.02 0.04   | 0.00 0.03 0.01    | -0.01 0.02 0.02   |  |
| 8 6            | -0.04 -0.04 -0.03 | 0.04 0.02 0.00    | 0.03 0.02 -0.06   |  |
| 9 6            | -0.01 0.01 -0.03  | 0.01 0.02 -0.04   | 0.02 -0.01 0.02   |  |
| 10 6           | 0.02 -0.02 0.12   | -0.02 -0.01 0.10  | -0.01 0.00 -0.03  |  |
| 11 1           | 0.02 0.08 -0.30   | -0.02 -0.10 -0.26 | -0.01 -0.06 0.06  |  |
| 12 8           | 0.01 -0.04 0.00   | 0.00 0.04 -0.02   | 0.05 0.01 0.00    |  |
| 13 8           | 0.03 -0.01 -0.01  | -0.03 0.02 0.00   | -0.05 -0.01 -0.01 |  |
| 14 6           | -0.02 -0.07 -0.08 | 0.02 0.04 -0.07   | 0.02 0.04 0.03    |  |
| 15 6           | 0.01 0.03 0.03    | 0.00 -0.02 0.01   | 0.00 -0.02 0.02   |  |
| 16 8           | 0.02 0.03 -0.02   | -0.01 0.04 -0.02  | -0.02 -0.02 0.02  |  |
| 17 8           | 0.05 -0.04 -0.03  | -0.05 -0.03 -0.02 | -0.03 0.02 0.01   |  |
| 18 1           | 0.09 -0.03 0.22   | -0.09 0.00 0.15   | -0.06 0.01 -0.02  |  |
| 19 1           | -0.01 0.10 -0.01  | 0.03 -0.12 -0.07  | -0.07 0.04 0.02   |  |
| 20 1           | -0.01 -0.11 -0.19 | 0.00 0.08 -0.22   | 0.01 0.07 0.14    |  |
| 21 8           | -0.02 0.04 0.01   | -0.01 -0.03 0.00  | 0.00 -0.02 0.01   |  |
| 22 8           | 0.05 -0.01 0.03   | -0.03 0.01 0.03   | -0.02 0.00 0.04   |  |
| 23 1           | 0.04 0.01 -0.41   | 0.06 0.15 -0.41   | 0.08 0.16 -0.64   |  |
| 24 1           | -0.54 0.04 0.09   | 0.37 -0.07 0.02   | 0.31 -0.02 -0.07  |  |

|                | 25                | 26               | 27                |  |
|----------------|-------------------|------------------|-------------------|--|
|                | A                 | A                | A                 |  |
| Frequencies -- | 596.4792          | 650.5803         | 676.2064          |  |
| Red. masses -- | 1.6517            | 4.5969           | 4.8299            |  |
| Frc consts --  | 0.3462            | 1.1464           | 1.3012            |  |
| IR Inten --    | 104.2863          | 46.3312          | 111.0115          |  |
| Raman Activ -- | 2.2073            | 1.5969           | 5.6544            |  |
| Depolar (P) -- | 0.7221            | 0.4556           | 0.0647            |  |
| Depolar (U) -- | 0.8387            | 0.6260           | 0.1216            |  |
| Atom AN        | X Y Z             | X Y Z            | X Y Z             |  |
| 1 8            | 0.04 -0.01 -0.01  | 0.00 0.00 0.00   | 0.00 -0.01 0.00   |  |
| 2 1            | -0.03 0.13 -0.01  | 0.00 -0.01 0.00  | 0.00 0.05 -0.02   |  |
| 3 1            | -0.32 -0.37 0.34  | 0.03 0.04 -0.03  | -0.10 -0.11 0.07  |  |
| 4 6            | -0.01 0.03 0.01   | 0.05 -0.06 0.02  | -0.14 -0.07 0.00  |  |
| 5 6            | -0.04 -0.01 -0.10 | -0.04 -0.14 0.02 | -0.07 0.09 0.01   |  |
| 6 6            | 0.00 0.05 0.03    | 0.13 -0.05 -0.02 | 0.02 -0.15 0.02   |  |
| 7 6            | 0.01 -0.02 0.03   | 0.01 0.01 0.00   | -0.09 -0.03 -0.01 |  |
| 8 6            | -0.04 -0.02 -0.09 | -0.13 0.06 0.04  | -0.07 0.10 -0.03  |  |
| 9 6            | -0.02 -0.02 0.03  | 0.00 -0.17 0.00  | 0.02 0.12 -0.01   |  |
| 10 6           | 0.01 0.02 -0.06   | 0.05 0.19 0.03   | 0.03 -0.14 -0.02  |  |
| 11 1           | 0.01 0.06 0.12    | 0.06 -0.15 -0.09 | 0.12 -0.04 0.04   |  |
| 12 8           | -0.05 -0.01 -0.02 | -0.01 0.01 0.00  | 0.14 -0.08 0.01   |  |
| 13 8           | 0.05 0.00 -0.01   | -0.02 -0.02 0.00 | 0.03 0.14 -0.01   |  |
| 14 6           | -0.03 -0.03 0.05  | -0.03 0.09 -0.03 | 0.14 0.05 0.01    |  |
| 15 6           | -0.01 0.02 0.03   | -0.12 0.08 0.01  | -0.12 0.10 0.00   |  |
| 16 8           | 0.01 -0.03 0.03   | 0.02 0.10 0.15   | -0.02 -0.05 -0.12 |  |

|    |   |       |       |       |       |       |       |       |       |       |
|----|---|-------|-------|-------|-------|-------|-------|-------|-------|-------|
| 17 | 8 | 0.03  | 0.03  | 0.01  | -0.02 | 0.02  | -0.15 | 0.01  | -0.01 | 0.10  |
| 18 | 1 | 0.06  | 0.01  | -0.03 | -0.05 | 0.20  | 0.01  | -0.16 | -0.12 | -0.01 |
| 19 | 1 | 0.07  | -0.05 | -0.06 | -0.01 | -0.05 | 0.00  | -0.04 | 0.31  | 0.02  |
| 20 | 1 | -0.01 | -0.07 | 0.24  | 0.03  | -0.07 | -0.11 | 0.15  | 0.04  | 0.06  |
| 21 | 8 | 0.01  | 0.03  | 0.01  | 0.17  | 0.06  | 0.03  | 0.15  | 0.09  | 0.03  |
| 22 | 8 | 0.02  | -0.02 | 0.04  | -0.05 | -0.14 | -0.04 | -0.05 | -0.12 | -0.03 |
| 23 | 1 | 0.04  | 0.04  | -0.64 | -0.32 | -0.43 | -0.02 | -0.33 | -0.42 | -0.15 |
| 24 | 1 | -0.25 | 0.06  | -0.05 | -0.03 | -0.04 | -0.57 | -0.01 | 0.04  | 0.42  |

28

29

30

A

A

A

|                |          |          |          |
|----------------|----------|----------|----------|
| Frequencies -- | 730.1326 | 747.6678 | 767.6829 |
| Red. masses -- | 5.6082   | 4.5371   | 5.3482   |
| Frc consts --  | 1.7615   | 1.4943   | 1.8570   |
| IR Inten --    | 29.9748  | 27.7035  | 30.3879  |
| Raman Activ -- | 0.8547   | 19.8487  | 0.9986   |
| Depolar (P) -- | 0.1366   | 0.0252   | 0.2068   |
| Depolar (U) -- | 0.2403   | 0.0491   | 0.3427   |

| Atom | AN | X     | Y     | Z     | X     | Y     | Z     | X     | Y     | Z     |
|------|----|-------|-------|-------|-------|-------|-------|-------|-------|-------|
| 1    | 8  | 0.00  | 0.00  | 0.01  | -0.01 | 0.01  | 0.00  | 0.01  | 0.00  | 0.00  |
| 2    | 1  | 0.02  | 0.04  | -0.03 | 0.00  | -0.08 | 0.03  | -0.01 | 0.04  | 0.00  |
| 3    | 1  | 0.00  | -0.01 | -0.03 | 0.13  | 0.15  | -0.10 | -0.08 | -0.09 | 0.07  |
| 4    | 6  | 0.01  | 0.01  | 0.04  | 0.14  | 0.01  | -0.01 | -0.06 | 0.09  | 0.04  |
| 5    | 6  | 0.02  | 0.01  | -0.29 | 0.06  | -0.02 | 0.05  | 0.03  | 0.02  | -0.03 |
| 6    | 6  | -0.02 | 0.00  | -0.13 | 0.00  | -0.01 | 0.02  | -0.08 | 0.17  | 0.01  |
| 7    | 6  | 0.01  | 0.04  | 0.33  | 0.16  | 0.08  | -0.06 | -0.06 | -0.06 | -0.08 |
| 8    | 6  | 0.00  | 0.00  | 0.11  | -0.04 | -0.06 | -0.03 | -0.02 | -0.05 | 0.01  |
| 9    | 6  | 0.09  | 0.01  | 0.02  | 0.09  | 0.11  | -0.04 | 0.47  | -0.10 | -0.03 |
| 10   | 6  | -0.01 | -0.01 | 0.07  | -0.02 | -0.05 | -0.01 | 0.03  | -0.03 | 0.04  |
| 11   | 1  | -0.02 | 0.00  | 0.10  | -0.07 | -0.10 | 0.00  | -0.01 | 0.26  | -0.23 |
| 12   | 8  | -0.01 | 0.01  | -0.09 | -0.11 | 0.17  | 0.00  | 0.03  | -0.08 | 0.03  |
| 13   | 8  | 0.00  | -0.02 | -0.06 | 0.00  | -0.19 | 0.03  | 0.00  | 0.08  | 0.01  |
| 14   | 6  | 0.00  | -0.01 | -0.14 | -0.11 | -0.12 | 0.02  | -0.05 | -0.11 | 0.02  |
| 15   | 6  | -0.05 | -0.04 | 0.30  | -0.08 | 0.10  | -0.02 | 0.00  | 0.04  | -0.03 |
| 16   | 8  | -0.03 | -0.06 | -0.01 | -0.03 | 0.00  | -0.12 | -0.12 | 0.01  | 0.05  |
| 17   | 8  | -0.02 | 0.05  | 0.07  | -0.01 | 0.02  | 0.11  | -0.13 | 0.02  | -0.01 |
| 18   | 1  | 0.00  | -0.01 | 0.49  | 0.10  | -0.07 | -0.05 | 0.27  | -0.07 | -0.27 |
| 19   | 1  | 0.02  | -0.09 | -0.32 | 0.11  | -0.46 | 0.02  | -0.05 | 0.20  | 0.08  |
| 20   | 1  | -0.01 | 0.01  | 0.04  | -0.10 | -0.17 | 0.03  | -0.05 | -0.14 | -0.21 |
| 21   | 8  | 0.03  | 0.03  | -0.09 | 0.07  | 0.10  | 0.04  | 0.01  | 0.02  | 0.02  |
| 22   | 8  | -0.02 | 0.00  | -0.11 | -0.06 | -0.08 | -0.01 | -0.01 | -0.01 | 0.01  |
| 23   | 1  | -0.10 | -0.13 | 0.42  | -0.27 | -0.31 | -0.13 | -0.04 | -0.05 | -0.04 |
| 24   | 1  | 0.14  | 0.03  | 0.04  | 0.16  | 0.04  | 0.41  | 0.42  | -0.06 | -0.17 |

31

32

33

A

A

A

|                |          |          |          |
|----------------|----------|----------|----------|
| Frequencies -- | 787.9756 | 806.5394 | 809.5489 |
| Red. masses -- | 1.7313   | 6.4568   | 5.4793   |
| Frc consts --  | 0.6334   | 2.4747   | 2.1157   |
| IR Inten --    | 60.8168  | 7.4905   | 3.2008   |
| Raman Activ -- | 0.2061   | 0.6072   | 1.3710   |
| Depolar (P) -- | 0.7500   | 0.5311   | 0.4279   |
| Depolar (U) -- | 0.8571   | 0.6938   | 0.5994   |

| Atom | AN | X     | Y     | Z     | X     | Y     | Z     | X     | Y     | Z     |
|------|----|-------|-------|-------|-------|-------|-------|-------|-------|-------|
| 1    | 8  | 0.00  | 0.00  | 0.00  | 0.00  | 0.00  | -0.01 | 0.00  | 0.00  | 0.00  |
| 2    | 1  | 0.00  | 0.01  | 0.00  | -0.02 | -0.04 | 0.03  | 0.00  | 0.03  | -0.02 |
| 3    | 1  | -0.01 | -0.01 | 0.01  | 0.00  | 0.00  | 0.04  | -0.04 | -0.04 | 0.02  |
| 4    | 6  | 0.00  | 0.00  | -0.04 | 0.02  | -0.04 | 0.24  | 0.04  | -0.11 | -0.06 |
| 5    | 6  | 0.00  | 0.00  | 0.18  | -0.01 | -0.04 | -0.04 | -0.03 | -0.12 | 0.00  |
| 6    | 6  | 0.00  | 0.01  | -0.02 | 0.07  | -0.04 | 0.02  | 0.21  | -0.09 | 0.00  |
| 7    | 6  | -0.01 | -0.01 | 0.02  | -0.02 | -0.04 | -0.38 | -0.08 | -0.03 | 0.12  |
| 8    | 6  | -0.01 | -0.01 | -0.06 | -0.04 | -0.03 | -0.19 | -0.11 | -0.08 | 0.06  |

|    |   |       |       |       |       |       |       |       |       |       |
|----|---|-------|-------|-------|-------|-------|-------|-------|-------|-------|
| 9  | 6 | 0.06  | -0.01 | -0.03 | -0.01 | 0.05  | -0.01 | 0.07  | 0.13  | -0.04 |
| 10 | 6 | 0.01  | 0.01  | -0.11 | 0.01  | 0.12  | 0.02  | 0.05  | 0.29  | 0.00  |
| 11 | 1 | 0.00  | 0.02  | 0.46  | 0.01  | -0.14 | -0.41 | 0.06  | -0.29 | 0.07  |
| 12 | 8 | 0.01  | -0.01 | -0.01 | 0.01  | -0.01 | 0.10  | 0.05  | -0.09 | -0.02 |
| 13 | 8 | 0.00  | 0.01  | -0.01 | -0.02 | 0.03  | 0.06  | -0.04 | 0.09  | -0.03 |
| 14 | 6 | -0.01 | -0.01 | -0.04 | -0.06 | 0.01  | -0.03 | -0.22 | -0.04 | 0.01  |
| 15 | 6 | 0.00  | -0.01 | 0.05  | -0.02 | -0.10 | 0.39  | 0.06  | -0.02 | -0.13 |
| 16 | 8 | -0.01 | 0.03  | 0.00  | 0.00  | 0.00  | -0.04 | -0.02 | 0.02  | -0.13 |
| 17 | 8 | -0.02 | -0.03 | -0.03 | 0.01  | 0.02  | 0.05  | 0.01  | 0.06  | 0.13  |
| 18 | 1 | 0.02  | 0.02  | 0.65  | -0.02 | 0.13  | -0.09 | 0.05  | 0.29  | -0.06 |
| 19 | 1 | -0.01 | 0.03  | -0.01 | -0.03 | 0.09  | 0.37  | -0.09 | 0.18  | -0.08 |
| 20 | 1 | -0.01 | -0.02 | 0.54  | -0.03 | -0.07 | 0.26  | -0.12 | -0.31 | -0.12 |
| 21 | 8 | 0.00  | 0.00  | -0.02 | -0.01 | 0.00  | -0.11 | -0.04 | -0.06 | 0.02  |
| 22 | 8 | 0.00  | 0.00  | -0.01 | 0.04  | 0.04  | -0.09 | 0.07  | 0.03  | 0.05  |
| 23 | 1 | 0.01  | 0.01  | 0.03  | 0.05  | 0.02  | 0.26  | 0.17  | 0.15  | -0.02 |
| 24 | 1 | 0.04  | -0.03 | 0.01  | 0.00  | 0.04  | 0.14  | 0.10  | 0.09  | 0.44  |

| 34             |          |       |       | 35    |          |       |       | 36    |          |       |  |  |
|----------------|----------|-------|-------|-------|----------|-------|-------|-------|----------|-------|--|--|
| A              |          |       |       | A     |          |       |       | A     |          |       |  |  |
| Frequencies -- | 864.6483 |       |       |       | 910.8725 |       |       |       | 929.2615 |       |  |  |
| Red. masses -- | 3.5403   |       |       |       | 5.9223   |       |       |       | 1.1690   |       |  |  |
| Frc consts --  | 1.5595   |       |       |       | 2.8951   |       |       |       | 0.5948   |       |  |  |
| IR Inten --    | 1.2989   |       |       |       | 18.6974  |       |       |       | 139.4543 |       |  |  |
| Raman Activ -- | 0.6053   |       |       |       | 3.8827   |       |       |       | 0.4488   |       |  |  |
| Depolar (P) -- | 0.6666   |       |       |       | 0.7434   |       |       |       | 0.6523   |       |  |  |
| Depolar (U) -- | 0.8000   |       |       |       | 0.8528   |       |       |       | 0.7895   |       |  |  |
| Atom           | AN       | X     | Y     | Z     | X        | Y     | Z     | X     | Y        | Z     |  |  |
| 1              | 8        | 0.00  | 0.00  | 0.01  | 0.01     | 0.00  | -0.01 | 0.00  | -0.01    | 0.03  |  |  |
| 2              | 1        | 0.01  | 0.03  | -0.02 | 0.00     | -0.03 | 0.02  | 0.02  | 0.13     | -0.07 |  |  |
| 3              | 1        | 0.00  | 0.00  | -0.02 | -0.04    | -0.04 | 0.08  | 0.02  | 0.01     | -0.13 |  |  |
| 4              | 6        | -0.01 | -0.01 | -0.21 | 0.22     | 0.01  | -0.01 | 0.01  | 0.00     | 0.00  |  |  |
| 5              | 6        | 0.00  | 0.01  | 0.18  | 0.28     | -0.04 | 0.01  | 0.02  | 0.00     | 0.00  |  |  |
| 6              | 6        | 0.00  | 0.00  | 0.09  | -0.05    | 0.12  | 0.00  | 0.00  | 0.01     | 0.01  |  |  |
| 7              | 6        | 0.00  | 0.02  | 0.18  | -0.09    | -0.08 | 0.04  | -0.01 | -0.01    | -0.06 |  |  |
| 8              | 6        | -0.01 | 0.00  | -0.22 | 0.23     | -0.09 | -0.02 | 0.02  | -0.01    | 0.00  |  |  |
| 9              | 6        | 0.02  | 0.00  | -0.01 | -0.19    | 0.03  | 0.02  | -0.01 | 0.00     | 0.00  |  |  |
| 10             | 6        | 0.00  | 0.01  | 0.05  | -0.01    | 0.02  | 0.00  | 0.00  | 0.00     | -0.01 |  |  |
| 11             | 1        | 0.00  | -0.01 | -0.24 | -0.16    | -0.01 | 0.00  | -0.01 | 0.00     | -0.01 |  |  |
| 12             | 8        | 0.00  | 0.00  | -0.04 | 0.01     | -0.15 | 0.00  | 0.00  | -0.02    | 0.03  |  |  |
| 13             | 8        | 0.01  | 0.00  | -0.02 | -0.13    | 0.15  | -0.04 | -0.01 | 0.03     | 0.06  |  |  |
| 14             | 6        | 0.00  | 0.01  | 0.11  | -0.10    | -0.10 | 0.01  | -0.01 | -0.01    | 0.00  |  |  |
| 15             | 6        | -0.02 | -0.04 | 0.19  | -0.02    | 0.08  | 0.04  | 0.00  | 0.01     | 0.00  |  |  |
| 16             | 8        | 0.00  | 0.02  | 0.00  | 0.04     | 0.00  | -0.01 | 0.00  | 0.00     | 0.00  |  |  |
| 17             | 8        | -0.01 | -0.02 | -0.03 | 0.03     | -0.01 | -0.01 | 0.00  | 0.00     | 0.00  |  |  |
| 18             | 1        | -0.01 | -0.01 | -0.75 | 0.34     | -0.03 | -0.02 | 0.03  | 0.00     | 0.02  |  |  |
| 19             | 1        | 0.01  | -0.03 | -0.22 | -0.20    | 0.32  | 0.37  | 0.00  | -0.08    | -0.97 |  |  |
| 20             | 1        | 0.00  | 0.00  | -0.30 | -0.16    | 0.05  | -0.03 | -0.01 | 0.00     | 0.02  |  |  |
| 21             | 8        | 0.00  | 0.01  | -0.05 | 0.02     | 0.11  | 0.02  | 0.00  | 0.01     | 0.00  |  |  |
| 22             | 8        | 0.02  | 0.01  | -0.04 | -0.16    | -0.07 | -0.04 | -0.01 | -0.01    | 0.00  |  |  |
| 23             | 1        | 0.01  | -0.01 | 0.06  | -0.29    | -0.22 | -0.07 | -0.02 | -0.01    | -0.01 |  |  |
| 24             | 1        | 0.01  | -0.02 | 0.02  | -0.03    | 0.00  | 0.01  | 0.00  | 0.00     | 0.00  |  |  |

| 37             |          |   |   | 38 |           |   |   | 39 |           |   |  |  |
|----------------|----------|---|---|----|-----------|---|---|----|-----------|---|--|--|
| A              |          |   |   | A  |           |   |   | A  |           |   |  |  |
| Frequencies -- | 984.4402 |   |   |    | 1026.6729 |   |   |    | 1095.5690 |   |  |  |
| Red. masses -- | 1.4039   |   |   |    | 1.3585    |   |   |    | 4.2668    |   |  |  |
| Frc consts --  | 0.8016   |   |   |    | 0.8437    |   |   |    | 3.0174    |   |  |  |
| IR Inten --    | 0.2146   |   |   |    | 1.0517    |   |   |    | 47.4473   |   |  |  |
| Raman Activ -- | 0.0296   |   |   |    | 0.0499    |   |   |    | 23.9898   |   |  |  |
| Depolar (P) -- | 0.3700   |   |   |    | 0.5038    |   |   |    | 0.1006    |   |  |  |
| Depolar (U) -- | 0.5402   |   |   |    | 0.6700    |   |   |    | 0.1828    |   |  |  |
| Atom           | AN       | X | Y | Z  | X         | Y | Z | X  | Y         | Z |  |  |



|    |   |       |       |       |      |       |       |       |       |       |
|----|---|-------|-------|-------|------|-------|-------|-------|-------|-------|
| 1  | 8 | 0.00  | 0.00  | 0.00  | 0.00 | 0.00  | 0.00  | 0.00  | 0.00  | 0.00  |
| 2  | 1 | 0.00  | 0.00  | 0.00  | 0.00 | 0.00  | 0.00  | 0.00  | 0.00  | 0.00  |
| 3  | 1 | 0.00  | 0.00  | 0.00  | 0.00 | 0.00  | 0.00  | 0.00  | 0.00  | 0.00  |
| 4  | 6 | 0.00  | 0.00  | 0.04  | 0.00 | 0.00  | 0.02  | -0.09 | 0.05  | 0.00  |
| 5  | 6 | 0.00  | 0.00  | 0.00  | 0.00 | 0.00  | 0.01  | 0.03  | 0.24  | -0.02 |
| 6  | 6 | 0.00  | 0.00  | -0.10 | 0.00 | 0.00  | -0.12 | 0.25  | -0.12 | 0.01  |
| 7  | 6 | 0.00  | 0.00  | -0.03 | 0.00 | 0.00  | -0.02 | -0.04 | 0.01  | 0.00  |
| 8  | 6 | 0.00  | 0.00  | -0.04 | 0.00 | 0.00  | 0.00  | 0.09  | 0.03  | 0.00  |
| 9  | 6 | 0.00  | 0.00  | 0.00  | 0.00 | 0.00  | 0.00  | 0.01  | 0.05  | 0.08  |
| 10 | 6 | 0.00  | 0.00  | -0.04 | 0.00 | 0.00  | 0.12  | -0.01 | -0.07 | 0.00  |
| 11 | 1 | 0.00  | 0.01  | 0.57  | 0.00 | 0.02  | 0.67  | 0.55  | 0.25  | -0.01 |
| 12 | 8 | 0.00  | 0.00  | 0.01  | 0.00 | 0.00  | 0.00  | 0.00  | 0.02  | 0.00  |
| 13 | 8 | 0.00  | 0.00  | 0.00  | 0.00 | 0.00  | 0.00  | 0.04  | -0.04 | 0.00  |
| 14 | 6 | 0.00  | 0.00  | 0.14  | 0.00 | 0.00  | -0.06 | -0.27 | -0.04 | 0.00  |
| 15 | 6 | 0.00  | -0.01 | 0.03  | 0.00 | 0.00  | 0.00  | 0.06  | 0.01  | 0.01  |
| 16 | 8 | 0.00  | 0.00  | 0.00  | 0.00 | 0.00  | 0.00  | 0.00  | -0.05 | 0.07  |
| 17 | 8 | 0.00  | 0.00  | 0.00  | 0.00 | 0.00  | 0.00  | -0.02 | -0.06 | -0.12 |
| 18 | 1 | 0.00  | 0.00  | 0.20  | 0.00 | -0.01 | -0.63 | -0.03 | -0.09 | 0.00  |
| 19 | 1 | 0.00  | 0.00  | 0.00  | 0.00 | 0.00  | -0.01 | 0.02  | 0.00  | 0.01  |
| 20 | 1 | -0.01 | 0.01  | -0.77 | 0.00 | -0.01 | 0.34  | -0.45 | 0.36  | 0.00  |
| 21 | 8 | 0.00  | 0.00  | -0.01 | 0.00 | 0.00  | 0.00  | 0.00  | 0.02  | 0.00  |
| 22 | 8 | 0.00  | 0.00  | 0.00  | 0.00 | 0.00  | 0.00  | -0.06 | -0.04 | -0.01 |
| 23 | 1 | 0.00  | -0.01 | 0.00  | 0.00 | 0.00  | 0.00  | 0.03  | 0.06  | 0.01  |
| 24 | 1 | 0.00  | 0.00  | 0.00  | 0.00 | 0.00  | 0.01  | -0.01 | -0.05 | -0.02 |

40

41

42

A

A

A

|                |           |           |           |
|----------------|-----------|-----------|-----------|
| Frequencies -- | 1151.5350 | 1164.9419 | 1199.2483 |
| Red. masses -- | 2.5728    | 4.9639    | 1.4345    |
| Frc consts --  | 2.0101    | 3.9690    | 1.2156    |
| IR Inten --    | 54.2140   | 86.4685   | 90.1978   |
| Raman Activ -- | 2.1168    | 4.9828    | 5.1184    |
| Depolar (P) -- | 0.0568    | 0.2015    | 0.5074    |
| Depolar (U) -- | 0.1076    | 0.3354    | 0.6732    |

Atom AN

X

Y

Z

X

Y

Z

X

Y

Z

|    |   |       |       |       |       |       |       |       |       |       |
|----|---|-------|-------|-------|-------|-------|-------|-------|-------|-------|
| 1  | 8 | 0.00  | 0.00  | 0.00  | 0.00  | 0.00  | 0.00  | 0.00  | 0.00  | 0.00  |
| 2  | 1 | 0.00  | -0.01 | 0.00  | -0.01 | 0.01  | 0.00  | 0.00  | 0.00  | 0.00  |
| 3  | 1 | 0.00  | 0.00  | 0.00  | 0.00  | -0.01 | 0.01  | 0.00  | 0.00  | 0.00  |
| 4  | 6 | -0.10 | -0.04 | 0.01  | -0.19 | -0.07 | 0.00  | -0.09 | -0.04 | 0.00  |
| 5  | 6 | 0.01  | 0.13  | -0.02 | -0.07 | -0.16 | 0.02  | 0.03  | -0.01 | 0.00  |
| 6  | 6 | -0.08 | -0.06 | 0.00  | 0.00  | 0.04  | 0.00  | -0.05 | -0.03 | 0.00  |
| 7  | 6 | -0.03 | 0.02  | 0.00  | -0.07 | 0.05  | 0.00  | -0.05 | 0.02  | 0.00  |
| 8  | 6 | 0.07  | -0.06 | 0.00  | 0.16  | -0.12 | -0.01 | 0.02  | 0.00  | 0.00  |
| 9  | 6 | 0.02  | 0.08  | 0.07  | -0.01 | -0.09 | -0.09 | -0.02 | -0.01 | -0.01 |
| 10 | 6 | 0.02  | 0.16  | 0.00  | -0.02 | 0.09  | 0.00  | 0.09  | 0.02  | 0.00  |
| 11 | 1 | -0.41 | -0.48 | 0.01  | 0.29  | 0.44  | -0.01 | -0.19 | -0.20 | 0.01  |
| 12 | 8 | 0.01  | 0.04  | 0.00  | 0.03  | 0.06  | 0.00  | 0.02  | 0.03  | 0.00  |
| 13 | 8 | 0.04  | -0.03 | 0.00  | 0.08  | -0.07 | 0.01  | 0.04  | -0.04 | 0.00  |
| 14 | 6 | 0.07  | -0.09 | 0.01  | 0.05  | 0.02  | 0.00  | -0.04 | 0.04  | 0.00  |
| 15 | 6 | 0.06  | 0.01  | 0.00  | 0.23  | 0.05  | 0.03  | -0.03 | 0.00  | 0.00  |
| 16 | 8 | 0.00  | -0.04 | 0.05  | 0.00  | 0.05  | -0.06 | 0.00  | 0.01  | -0.01 |
| 17 | 8 | -0.02 | -0.04 | -0.11 | 0.02  | 0.05  | 0.14  | 0.00  | 0.00  | 0.02  |
| 18 | 1 | 0.01  | 0.17  | 0.00  | -0.23 | 0.13  | 0.00  | 0.82  | -0.08 | 0.00  |
| 19 | 1 | 0.02  | 0.00  | 0.00  | 0.05  | 0.00  | 0.00  | 0.01  | 0.03  | -0.01 |
| 20 | 1 | 0.27  | -0.57 | -0.01 | -0.04 | 0.28  | 0.00  | -0.18 | 0.38  | 0.01  |
| 21 | 8 | 0.00  | 0.05  | 0.01  | -0.02 | 0.12  | 0.02  | 0.00  | -0.02 | 0.00  |
| 22 | 8 | -0.05 | -0.03 | -0.01 | -0.18 | -0.14 | -0.05 | 0.02  | 0.02  | 0.01  |
| 23 | 1 | 0.03  | 0.06  | 0.02  | 0.26  | 0.35  | 0.09  | -0.11 | -0.11 | -0.04 |
| 24 | 1 | 0.01  | -0.01 | 0.16  | -0.03 | 0.01  | -0.22 | 0.00  | -0.01 | -0.06 |

43

44

45

A

A

A

|                |           |           |           |
|----------------|-----------|-----------|-----------|
| Frequencies -- | 1223.1585 | 1231.2894 | 1252.5771 |
| Red. masses -- | 1.9104    | 1.7795    | 1.7619    |
| Frc consts --  | 1.6840    | 1.5895    | 1.6287    |
| IR Inten --    | 327.2955  | 177.4466  | 1.7580    |
| Raman Activ -- | 14.4886   | 7.2092    | 0.4402    |
| Depolar (P) -- | 0.2701    | 0.0786    | 0.7160    |
| Depolar (U) -- | 0.4253    | 0.1457    | 0.8345    |

  

| Atom | AN | X     | Y     | Z     | X     | Y     | Z     | X     | Y     | Z     |
|------|----|-------|-------|-------|-------|-------|-------|-------|-------|-------|
| 1    | 8  | 0.00  | 0.00  | 0.00  | 0.00  | 0.00  | 0.00  | 0.00  | 0.00  | 0.00  |
| 2    | 1  | 0.00  | 0.01  | 0.00  | 0.00  | 0.00  | 0.00  | 0.00  | 0.00  | 0.00  |
| 3    | 1  | 0.00  | 0.00  | 0.00  | 0.00  | 0.00  | 0.00  | 0.00  | 0.00  | 0.00  |
| 4    | 6  | -0.06 | 0.00  | 0.00  | 0.02  | 0.05  | 0.00  | 0.05  | 0.12  | 0.00  |
| 5    | 6  | 0.05  | 0.04  | 0.01  | 0.00  | 0.14  | 0.02  | -0.12 | 0.00  | 0.00  |
| 6    | 6  | 0.01  | -0.01 | 0.00  | 0.02  | -0.05 | 0.00  | 0.05  | -0.02 | 0.00  |
| 7    | 6  | -0.05 | 0.02  | 0.00  | 0.03  | -0.01 | 0.00  | 0.04  | -0.02 | 0.00  |
| 8    | 6  | 0.11  | -0.11 | 0.00  | -0.01 | 0.05  | 0.00  | 0.01  | -0.14 | 0.00  |
| 9    | 6  | 0.00  | -0.03 | -0.02 | -0.01 | -0.07 | -0.05 | 0.04  | 0.00  | 0.00  |
| 10   | 6  | -0.03 | 0.07  | 0.00  | 0.00  | -0.01 | 0.00  | 0.01  | 0.00  | 0.00  |
| 11   | 1  | 0.14  | 0.17  | 0.00  | -0.19 | -0.34 | 0.01  | -0.32 | -0.53 | 0.01  |
| 12   | 8  | 0.01  | 0.02  | 0.00  | -0.01 | -0.01 | 0.00  | -0.02 | -0.03 | 0.00  |
| 13   | 8  | 0.03  | -0.03 | 0.00  | -0.02 | 0.02  | 0.00  | -0.02 | 0.02  | 0.00  |
| 14   | 6  | 0.01  | -0.03 | 0.00  | -0.03 | -0.04 | 0.00  | 0.06  | 0.02  | 0.00  |
| 15   | 6  | -0.09 | 0.00  | -0.01 | 0.01  | 0.00  | 0.00  | 0.05  | 0.01  | 0.00  |
| 16   | 8  | 0.00  | 0.01  | -0.02 | 0.00  | 0.02  | -0.06 | -0.01 | 0.00  | 0.01  |
| 17   | 8  | 0.00  | 0.00  | 0.05  | 0.01  | -0.02 | 0.13  | -0.01 | 0.00  | -0.01 |
| 18   | 1  | -0.41 | 0.13  | -0.01 | 0.05  | -0.02 | 0.00  | -0.22 | 0.03  | -0.01 |
| 19   | 1  | 0.00  | 0.04  | -0.01 | 0.00  | -0.01 | 0.00  | -0.02 | 0.02  | 0.00  |
| 20   | 1  | 0.02  | -0.04 | 0.02  | 0.04  | -0.22 | 0.00  | -0.19 | 0.66  | 0.00  |
| 21   | 8  | -0.01 | -0.04 | -0.01 | 0.00  | 0.01  | 0.00  | -0.01 | 0.02  | 0.00  |
| 22   | 8  | 0.05  | 0.11  | 0.03  | -0.01 | -0.02 | -0.01 | -0.02 | 0.01  | 0.00  |
| 23   | 1  | -0.54 | -0.55 | -0.16 | 0.12  | 0.13  | 0.04  | -0.12 | -0.12 | -0.04 |
| 24   | 1  | -0.03 | -0.04 | -0.26 | -0.10 | -0.13 | -0.82 | 0.00  | 0.02  | 0.08  |

|  |    |    |    |
|--|----|----|----|
|  | 46 | 47 | 48 |
|  | A  | A  | A  |

  

|                |           |           |           |
|----------------|-----------|-----------|-----------|
| Frequencies -- | 1313.8896 | 1341.3875 | 1385.3437 |
| Red. masses -- | 3.4570    | 5.5469    | 2.4375    |
| Frc consts --  | 3.5161    | 5.8805    | 2.7562    |
| IR Inten --    | 290.4599  | 127.7007  | 93.8642   |
| Raman Activ -- | 21.6411   | 25.5062   | 5.9275    |
| Depolar (P) -- | 0.1412    | 0.4668    | 0.1185    |
| Depolar (U) -- | 0.2474    | 0.6365    | 0.2119    |

  

| Atom | AN | X     | Y     | Z     | X     | Y     | Z     | X     | Y     | Z     |
|------|----|-------|-------|-------|-------|-------|-------|-------|-------|-------|
| 1    | 8  | 0.00  | 0.01  | 0.00  | 0.00  | -0.01 | 0.00  | 0.00  | 0.00  | 0.00  |
| 2    | 1  | 0.02  | -0.07 | 0.01  | -0.02 | 0.06  | -0.01 | 0.00  | 0.01  | 0.00  |
| 3    | 1  | 0.03  | 0.05  | -0.06 | -0.02 | -0.03 | 0.05  | 0.00  | 0.00  | 0.00  |
| 4    | 6  | -0.07 | -0.21 | 0.00  | 0.19  | -0.15 | 0.00  | -0.03 | 0.09  | 0.00  |
| 5    | 6  | -0.15 | 0.06  | 0.00  | -0.24 | 0.00  | 0.00  | 0.00  | 0.02  | 0.00  |
| 6    | 6  | 0.02  | 0.05  | 0.00  | 0.15  | 0.18  | 0.00  | 0.02  | -0.04 | 0.00  |
| 7    | 6  | 0.25  | -0.06 | 0.01  | -0.21 | 0.04  | -0.01 | 0.02  | 0.00  | 0.00  |
| 8    | 6  | 0.10  | 0.05  | 0.00  | 0.15  | 0.24  | 0.00  | 0.00  | 0.10  | 0.00  |
| 9    | 6  | 0.02  | 0.01  | 0.01  | 0.03  | -0.02 | -0.01 | -0.04 | -0.17 | -0.12 |
| 10   | 6  | -0.06 | 0.07  | 0.00  | -0.21 | -0.02 | 0.00  | 0.01  | -0.05 | 0.00  |
| 11   | 1  | 0.13  | 0.20  | -0.01 | -0.26 | -0.37 | 0.01  | -0.07 | -0.17 | 0.00  |
| 12   | 8  | -0.02 | -0.04 | 0.00  | 0.04  | 0.06  | -0.01 | -0.01 | -0.01 | 0.00  |
| 13   | 8  | -0.11 | 0.14  | -0.01 | 0.07  | -0.11 | 0.01  | 0.00  | 0.01  | 0.00  |
| 14   | 6  | 0.03  | -0.07 | 0.00  | 0.06  | -0.19 | 0.00  | -0.06 | 0.03  | 0.00  |
| 15   | 6  | 0.04  | 0.00  | 0.01  | -0.02 | 0.00  | 0.01  | 0.19  | 0.01  | 0.03  |
| 16   | 8  | 0.00  | 0.00  | 0.00  | -0.01 | 0.00  | 0.00  | 0.01  | 0.01  | 0.04  |
| 17   | 8  | 0.00  | -0.01 | 0.00  | 0.00  | 0.01  | 0.00  | 0.01  | 0.07  | 0.02  |
| 18   | 1  | 0.37  | 0.02  | 0.00  | 0.17  | -0.08 | 0.00  | 0.09  | -0.07 | 0.00  |

|    |   |       |       |       |       |       |       |       |       |       |
|----|---|-------|-------|-------|-------|-------|-------|-------|-------|-------|
| 19 | 1 | 0.24  | -0.61 | 0.09  | -0.23 | 0.52  | -0.07 | 0.00  | 0.00  | 0.00  |
| 20 | 1 | -0.06 | 0.17  | 0.00  | -0.04 | 0.07  | 0.01  | 0.12  | -0.43 | 0.00  |
| 21 | 8 | -0.01 | -0.02 | -0.01 | 0.01  | -0.04 | -0.01 | -0.03 | -0.05 | -0.01 |
| 22 | 8 | -0.02 | 0.03  | 0.00  | 0.00  | 0.02  | 0.00  | -0.06 | 0.04  | 0.00  |
| 23 | 1 | -0.24 | -0.22 | -0.07 | -0.09 | -0.07 | -0.02 | -0.41 | -0.37 | -0.11 |
| 24 | 1 | -0.02 | -0.01 | -0.05 | -0.01 | 0.02  | 0.07  | 0.07  | 0.13  | 0.54  |

49

50

51

A

A

A

|                |           |           |           |
|----------------|-----------|-----------|-----------|
| Frequencies -- | 1393.7735 | 1474.7242 | 1506.0820 |
|----------------|-----------|-----------|-----------|

|                |        |        |        |
|----------------|--------|--------|--------|
| Red. masses -- | 2.9930 | 1.5411 | 2.5369 |
|----------------|--------|--------|--------|

|               |        |        |        |
|---------------|--------|--------|--------|
| Frc consts -- | 3.4256 | 1.9747 | 3.3904 |
|---------------|--------|--------|--------|

|             |         |         |         |
|-------------|---------|---------|---------|
| IR Inten -- | 93.4967 | 32.0490 | 10.5286 |
|-------------|---------|---------|---------|

|                |         |        |        |
|----------------|---------|--------|--------|
| Raman Activ -- | 10.2949 | 2.8087 | 0.4914 |
|----------------|---------|--------|--------|

|                |        |        |        |
|----------------|--------|--------|--------|
| Depolar (P) -- | 0.3860 | 0.7469 | 0.6945 |
|----------------|--------|--------|--------|

|                |        |        |        |
|----------------|--------|--------|--------|
| Depolar (U) -- | 0.5570 | 0.8551 | 0.8197 |
|----------------|--------|--------|--------|

| Atom | AN | X     | Y     | Z     | X     | Y     | Z     | X     | Y     | Z     |
|------|----|-------|-------|-------|-------|-------|-------|-------|-------|-------|
| 1    | 8  | 0.00  | 0.00  | 0.00  | 0.01  | -0.01 | 0.00  | 0.00  | 0.00  | 0.00  |
| 2    | 1  | 0.00  | 0.02  | 0.00  | -0.04 | 0.12  | -0.01 | -0.01 | 0.03  | 0.00  |
| 3    | 1  | -0.01 | -0.01 | 0.01  | -0.02 | -0.02 | 0.10  | 0.00  | 0.00  | 0.02  |
| 4    | 6  | 0.07  | -0.01 | 0.00  | 0.01  | -0.03 | 0.00  | -0.10 | -0.12 | 0.00  |
| 5    | 6  | -0.02 | -0.08 | 0.00  | -0.02 | 0.05  | 0.00  | 0.11  | 0.00  | 0.00  |
| 6    | 6  | -0.03 | 0.01  | 0.00  | -0.03 | -0.05 | 0.00  | -0.01 | 0.13  | 0.00  |
| 7    | 6  | -0.03 | 0.00  | 0.00  | 0.13  | -0.08 | 0.01  | 0.05  | -0.03 | 0.00  |
| 8    | 6  | -0.12 | 0.03  | 0.00  | -0.01 | -0.04 | 0.00  | -0.09 | 0.12  | 0.00  |
| 9    | 6  | 0.04  | 0.20  | 0.13  | 0.00  | -0.02 | -0.02 | -0.03 | -0.01 | 0.00  |
| 10   | 6  | 0.01  | -0.04 | 0.00  | -0.01 | 0.03  | 0.00  | 0.18  | -0.02 | 0.00  |
| 11   | 1  | 0.06  | 0.12  | 0.00  | 0.15  | 0.19  | 0.00  | -0.31 | -0.22 | 0.00  |
| 12   | 8  | 0.00  | 0.01  | 0.00  | -0.01 | 0.06  | -0.01 | 0.01  | 0.04  | 0.00  |
| 13   | 8  | 0.00  | -0.02 | 0.00  | -0.06 | -0.04 | 0.00  | -0.02 | -0.01 | 0.00  |
| 14   | 6  | 0.01  | 0.06  | 0.00  | 0.02  | 0.01  | 0.00  | -0.04 | -0.13 | 0.00  |
| 15   | 6  | 0.25  | 0.01  | 0.03  | 0.00  | 0.00  | 0.00  | 0.04  | 0.01  | 0.01  |
| 16   | 8  | -0.01 | -0.01 | -0.04 | 0.00  | 0.00  | 0.01  | 0.00  | 0.00  | 0.00  |
| 17   | 8  | -0.01 | -0.08 | -0.02 | 0.00  | 0.01  | 0.00  | 0.00  | 0.00  | 0.00  |
| 18   | 1  | 0.09  | -0.05 | 0.00  | 0.14  | 0.02  | 0.00  | -0.69 | 0.10  | 0.00  |
| 19   | 1  | -0.07 | 0.14  | -0.02 | -0.42 | 0.81  | -0.11 | -0.08 | 0.16  | -0.02 |
| 20   | 1  | 0.08  | -0.10 | 0.00  | 0.01  | 0.03  | 0.00  | -0.26 | 0.36  | 0.00  |
| 21   | 8  | -0.04 | -0.04 | -0.01 | 0.00  | 0.01  | 0.00  | 0.00  | -0.03 | -0.01 |
| 22   | 8  | -0.07 | 0.03  | 0.00  | 0.00  | 0.00  | 0.00  | -0.01 | 0.00  | 0.00  |
| 23   | 1  | -0.45 | -0.41 | -0.12 | 0.01  | 0.00  | 0.00  | -0.04 | -0.03 | -0.01 |
| 24   | 1  | -0.08 | -0.14 | -0.59 | 0.00  | 0.01  | 0.05  | 0.01  | 0.00  | 0.01  |

52

53

54

A

A

A

|                |           |           |           |
|----------------|-----------|-----------|-----------|
| Frequencies -- | 1516.3480 | 1622.7208 | 1657.9637 |
|----------------|-----------|-----------|-----------|

|                |        |        |        |
|----------------|--------|--------|--------|
| Red. masses -- | 4.5152 | 1.1008 | 7.2488 |
|----------------|--------|--------|--------|

|               |        |        |         |
|---------------|--------|--------|---------|
| Frc consts -- | 6.1168 | 1.7079 | 11.7399 |
|---------------|--------|--------|---------|

|             |         |          |         |
|-------------|---------|----------|---------|
| IR Inten -- | 13.3307 | 136.1542 | 70.1285 |
|-------------|---------|----------|---------|

|                |         |         |         |
|----------------|---------|---------|---------|
| Raman Activ -- | 14.4089 | 12.1743 | 42.4548 |
|----------------|---------|---------|---------|

|                |        |        |        |
|----------------|--------|--------|--------|
| Depolar (P) -- | 0.3591 | 0.6449 | 0.7448 |
|----------------|--------|--------|--------|

|                |        |        |        |
|----------------|--------|--------|--------|
| Depolar (U) -- | 0.5284 | 0.7841 | 0.8538 |
|----------------|--------|--------|--------|

| Atom | AN | X     | Y     | Z     | X     | Y     | Z     | X     | Y     | Z    |
|------|----|-------|-------|-------|-------|-------|-------|-------|-------|------|
| 1    | 8  | 0.00  | 0.00  | 0.00  | 0.00  | -0.06 | -0.04 | 0.00  | -0.01 | 0.00 |
| 2    | 1  | 0.01  | -0.04 | 0.00  | -0.37 | 0.54  | 0.09  | -0.03 | 0.05  | 0.01 |
| 3    | 1  | 0.01  | 0.01  | -0.04 | 0.37  | 0.40  | 0.51  | 0.04  | 0.04  | 0.04 |
| 4    | 6  | 0.23  | -0.13 | 0.00  | 0.00  | 0.00  | 0.00  | 0.24  | -0.08 | 0.00 |
| 5    | 6  | 0.03  | 0.26  | 0.00  | 0.00  | 0.00  | 0.00  | -0.34 | 0.04  | 0.00 |
| 6    | 6  | -0.12 | -0.07 | 0.00  | 0.00  | 0.00  | 0.00  | -0.26 | -0.08 | 0.00 |
| 7    | 6  | -0.16 | 0.05  | 0.00  | 0.00  | 0.03  | 0.00  | -0.06 | 0.00  | 0.00 |
| 8    | 6  | -0.24 | -0.08 | 0.00  | 0.00  | 0.00  | 0.00  | 0.26  | 0.03  | 0.00 |
| 9    | 6  | -0.02 | -0.11 | -0.08 | 0.00  | 0.00  | 0.00  | 0.04  | 0.00  | 0.00 |
| 10   | 6  | 0.00  | 0.10  | 0.00  | 0.00  | 0.00  | 0.00  | 0.41  | -0.05 | 0.00 |

|    |   |       |       |       |      |       |      |       |       |       |
|----|---|-------|-------|-------|------|-------|------|-------|-------|-------|
| 11 | 1 | 0.26  | 0.44  | -0.01 | 0.00 | -0.01 | 0.00 | 0.00  | 0.30  | -0.01 |
| 12 | 8 | 0.02  | -0.01 | 0.00  | 0.00 | -0.03 | 0.00 | 0.01  | 0.01  | 0.00  |
| 13 | 8 | 0.04  | 0.00  | 0.00  | 0.00 | 0.00  | 0.00 | 0.00  | 0.00  | 0.00  |
| 14 | 6 | 0.11  | -0.10 | 0.00  | 0.00 | -0.01 | 0.00 | -0.22 | 0.13  | 0.00  |
| 15 | 6 | 0.11  | 0.00  | 0.00  | 0.00 | 0.00  | 0.00 | -0.05 | 0.02  | 0.00  |
| 16 | 8 | 0.00  | 0.00  | 0.03  | 0.00 | 0.00  | 0.00 | -0.01 | 0.00  | 0.00  |
| 17 | 8 | 0.00  | 0.03  | 0.02  | 0.00 | 0.00  | 0.00 | 0.00  | 0.00  | 0.00  |
| 18 | 1 | 0.05  | 0.12  | 0.00  | 0.01 | 0.00  | 0.00 | -0.50 | 0.08  | 0.00  |
| 19 | 1 | 0.15  | -0.29 | 0.04  | 0.02 | -0.07 | 0.00 | 0.02  | -0.06 | 0.01  |
| 20 | 1 | -0.12 | 0.50  | -0.01 | 0.00 | 0.01  | 0.00 | -0.09 | -0.26 | 0.00  |
| 21 | 8 | -0.01 | 0.00  | 0.00  | 0.00 | 0.00  | 0.00 | 0.01  | -0.01 | 0.00  |
| 22 | 8 | -0.02 | 0.00  | 0.00  | 0.00 | 0.00  | 0.00 | 0.00  | 0.00  | 0.00  |
| 23 | 1 | -0.05 | -0.05 | -0.02 | 0.00 | 0.00  | 0.00 | 0.02  | 0.03  | 0.01  |
| 24 | 1 | 0.02  | 0.04  | 0.15  | 0.00 | 0.00  | 0.00 | -0.02 | 0.00  | 0.00  |

55

56

57

A

A

A

|                |           |           |           |
|----------------|-----------|-----------|-----------|
| Frequencies -- | 1665.2671 | 1814.3088 | 1851.9212 |
| Red. masses -- | 6.5834    | 7.2789    | 10.5397   |
| Frc consts --  | 10.7564   | 14.1168   | 21.2972   |
| IR Inten --    | 7.0804    | 208.4408  | 360.4421  |
| Raman Activ -- | 16.8914   | 48.8726   | 45.8119   |
| Depolar (P) -- | 0.7183    | 0.2853    | 0.2876    |
| Depolar (U) -- | 0.8360    | 0.4440    | 0.4467    |

| Atom | AN | X     | Y     | Z     | X     | Y     | Z     | X     | Y     | Z     |
|------|----|-------|-------|-------|-------|-------|-------|-------|-------|-------|
| 1    | 8  | 0.00  | 0.00  | 0.00  | 0.00  | 0.01  | 0.01  | 0.00  | 0.00  | 0.00  |
| 2    | 1  | -0.03 | 0.04  | 0.01  | 0.09  | -0.13 | -0.03 | 0.01  | -0.01 | 0.00  |
| 3    | 1  | 0.03  | 0.04  | 0.03  | -0.16 | -0.22 | -0.11 | -0.02 | -0.02 | -0.01 |
| 4    | 6  | 0.01  | -0.30 | 0.01  | -0.03 | -0.09 | 0.00  | -0.01 | -0.03 | 0.00  |
| 5    | 6  | 0.02  | 0.19  | 0.00  | -0.01 | 0.03  | 0.00  | 0.01  | 0.06  | -0.01 |
| 6    | 6  | 0.16  | 0.30  | -0.01 | -0.01 | 0.02  | 0.00  | 0.01  | 0.01  | 0.00  |
| 7    | 6  | -0.03 | -0.04 | 0.00  | 0.17  | 0.58  | -0.05 | 0.03  | 0.09  | -0.01 |
| 8    | 6  | -0.07 | -0.29 | 0.00  | 0.00  | 0.00  | 0.00  | 0.01  | -0.10 | 0.00  |
| 9    | 6  | -0.01 | -0.03 | -0.04 | 0.01  | -0.01 | 0.03  | 0.00  | -0.14 | 0.24  |
| 10   | 6  | -0.02 | -0.18 | 0.00  | 0.03  | -0.01 | 0.00  | -0.02 | 0.00  | 0.00  |
| 11   | 1  | -0.32 | -0.32 | 0.01  | -0.04 | 0.00  | 0.00  | -0.02 | -0.02 | 0.00  |
| 12   | 8  | 0.02  | 0.05  | 0.00  | -0.09 | -0.34 | 0.03  | -0.01 | -0.05 | 0.00  |
| 13   | 8  | 0.00  | 0.00  | 0.00  | 0.01  | -0.07 | 0.01  | 0.00  | -0.01 | 0.00  |
| 14   | 6  | -0.09 | 0.35  | -0.01 | -0.01 | 0.02  | 0.00  | 0.01  | 0.02  | 0.00  |
| 15   | 6  | 0.01  | -0.03 | -0.01 | 0.00  | -0.10 | -0.02 | -0.03 | 0.67  | 0.12  |
| 16   | 8  | 0.00  | -0.01 | 0.02  | 0.00  | 0.01  | -0.02 | 0.00  | 0.09  | -0.16 |
| 17   | 8  | 0.00  | 0.01  | 0.01  | -0.01 | 0.00  | 0.00  | 0.00  | 0.00  | -0.03 |
| 18   | 1  | -0.03 | -0.22 | 0.00  | -0.03 | 0.00  | 0.00  | 0.02  | -0.01 | 0.00  |
| 19   | 1  | 0.02  | -0.04 | 0.00  | -0.30 | 0.52  | -0.06 | -0.05 | 0.07  | -0.01 |
| 20   | 1  | 0.23  | -0.42 | 0.00  | 0.00  | -0.02 | 0.00  | 0.04  | -0.02 | 0.00  |
| 21   | 8  | -0.01 | 0.04  | 0.01  | 0.00  | 0.06  | 0.01  | 0.00  | -0.42 | -0.08 |
| 22   | 8  | 0.00  | 0.00  | 0.00  | 0.00  | 0.01  | 0.00  | -0.01 | -0.06 | -0.01 |
| 23   | 1  | 0.00  | -0.01 | 0.00  | -0.04 | -0.04 | -0.01 | 0.30  | 0.29  | 0.09  |
| 24   | 1  | 0.00  | 0.01  | 0.02  | 0.02  | 0.00  | 0.00  | -0.01 | 0.02  | 0.14  |

58

59

60

A

A

A

|                |           |           |           |
|----------------|-----------|-----------|-----------|
| Frequencies -- | 1866.7975 | 3215.5293 | 3238.4079 |
| Red. masses -- | 10.7597   | 1.0893    | 1.0928    |
| Frc consts --  | 22.0925   | 6.6360    | 6.7522    |
| IR Inten --    | 449.1747  | 4.7027    | 0.8067    |
| Raman Activ -- | 41.3596   | 76.7417   | 66.9736   |
| Depolar (P) -- | 0.0595    | 0.5263    | 0.4722    |
| Depolar (U) -- | 0.1122    | 0.6897    | 0.6415    |

| Atom | AN | X     | Y    | Z    | X    | Y    | Z    | X    | Y    | Z    |
|------|----|-------|------|------|------|------|------|------|------|------|
| 1    | 8  | 0.00  | 0.00 | 0.00 | 0.00 | 0.00 | 0.00 | 0.00 | 0.00 | 0.00 |
| 2    | 1  | -0.01 | 0.01 | 0.01 | 0.00 | 0.00 | 0.00 | 0.00 | 0.00 | 0.00 |

|    |   |       |       |       |       |       |       |       |       |      |
|----|---|-------|-------|-------|-------|-------|-------|-------|-------|------|
| 3  | 1 | 0.01  | 0.02  | 0.02  | 0.00  | 0.00  | 0.00  | 0.00  | 0.00  | 0.00 |
| 4  | 6 | 0.01  | 0.01  | 0.00  | 0.00  | 0.00  | 0.00  | 0.00  | 0.00  | 0.00 |
| 5  | 6 | 0.00  | 0.05  | -0.02 | 0.00  | 0.00  | 0.00  | 0.00  | 0.00  | 0.00 |
| 6  | 6 | 0.00  | -0.01 | 0.00  | -0.02 | 0.02  | 0.00  | -0.06 | 0.05  | 0.00 |
| 7  | 6 | -0.03 | -0.08 | 0.01  | 0.00  | 0.00  | 0.00  | 0.00  | 0.00  | 0.00 |
| 8  | 6 | -0.01 | 0.03  | 0.00  | 0.00  | 0.00  | 0.00  | 0.00  | 0.00  | 0.00 |
| 9  | 6 | 0.01  | -0.38 | 0.58  | 0.00  | 0.00  | 0.00  | 0.00  | 0.00  | 0.00 |
| 10 | 6 | 0.01  | 0.00  | 0.00  | -0.01 | -0.08 | 0.00  | 0.01  | 0.02  | 0.00 |
| 11 | 1 | 0.00  | -0.01 | 0.00  | 0.25  | -0.19 | 0.00  | 0.70  | -0.53 | 0.01 |
| 12 | 8 | 0.01  | 0.05  | -0.01 | 0.00  | 0.00  | 0.00  | 0.00  | 0.00  | 0.00 |
| 13 | 8 | 0.00  | 0.01  | 0.00  | 0.00  | 0.00  | 0.00  | 0.00  | 0.00  | 0.00 |
| 14 | 6 | -0.01 | 0.00  | 0.00  | 0.02  | 0.01  | 0.00  | -0.03 | -0.01 | 0.00 |
| 15 | 6 | 0.02  | -0.27 | -0.05 | 0.00  | 0.00  | 0.00  | 0.00  | 0.00  | 0.00 |
| 16 | 8 | -0.01 | 0.23  | -0.38 | 0.00  | 0.00  | 0.00  | 0.00  | 0.00  | 0.00 |
| 17 | 8 | -0.01 | 0.02  | -0.06 | 0.00  | 0.00  | 0.00  | 0.00  | 0.00  | 0.00 |
| 18 | 1 | -0.01 | 0.00  | 0.00  | 0.12  | 0.90  | -0.02 | -0.03 | -0.17 | 0.00 |
| 19 | 1 | 0.05  | -0.07 | 0.01  | 0.00  | 0.00  | 0.00  | 0.00  | 0.00  | 0.00 |
| 20 | 1 | -0.01 | -0.01 | 0.00  | -0.25 | -0.10 | 0.00  | 0.40  | 0.16  | 0.00 |
| 21 | 8 | 0.00  | 0.17  | 0.03  | 0.00  | 0.00  | 0.00  | 0.00  | 0.00  | 0.00 |
| 22 | 8 | 0.00  | 0.02  | 0.00  | 0.00  | 0.00  | 0.00  | 0.00  | 0.00  | 0.00 |
| 23 | 1 | -0.12 | -0.12 | -0.03 | 0.00  | 0.00  | 0.00  | 0.00  | 0.00  | 0.00 |
| 24 | 1 | 0.05  | 0.07  | 0.39  | 0.00  | 0.00  | 0.00  | 0.00  | 0.00  | 0.00 |

61

62

63

A

A

A

|                |           |           |           |
|----------------|-----------|-----------|-----------|
| Frequencies -- | 3244.2487 | 3455.4462 | 3764.8722 |
|----------------|-----------|-----------|-----------|

|                |        |        |        |
|----------------|--------|--------|--------|
| Red. masses -- | 1.0961 | 1.0674 | 1.0550 |
|----------------|--------|--------|--------|

|               |        |        |        |
|---------------|--------|--------|--------|
| Frc consts -- | 6.7972 | 7.5091 | 8.8106 |
|---------------|--------|--------|--------|

|             |        |           |          |
|-------------|--------|-----------|----------|
| IR Inten -- | 1.9560 | 1046.3991 | 266.7669 |
|-------------|--------|-----------|----------|

|                |          |          |          |
|----------------|----------|----------|----------|
| Raman Activ -- | 160.5245 | 202.9629 | 103.8981 |
|----------------|----------|----------|----------|

|                |        |        |        |
|----------------|--------|--------|--------|
| Depolar (P) -- | 0.1201 | 0.2479 | 0.1674 |
|----------------|--------|--------|--------|

|                |        |        |        |
|----------------|--------|--------|--------|
| Depolar (U) -- | 0.2145 | 0.3973 | 0.2868 |
|----------------|--------|--------|--------|

| Atom | AN | X     | Y     | Z     | X     | Y     | Z     | X     | Y     | Z     |
|------|----|-------|-------|-------|-------|-------|-------|-------|-------|-------|
| 1    | 8  | 0.00  | 0.00  | 0.00  | 0.00  | 0.00  | 0.00  | -0.03 | 0.04  | 0.01  |
| 2    | 1  | 0.00  | 0.00  | 0.00  | 0.02  | 0.02  | 0.02  | -0.19 | -0.06 | -0.17 |
| 3    | 1  | 0.00  | 0.00  | 0.00  | -0.06 | 0.07  | 0.00  | 0.70  | -0.65 | 0.05  |
| 4    | 6  | 0.00  | 0.00  | 0.00  | 0.00  | 0.00  | 0.00  | 0.00  | 0.00  | 0.00  |
| 5    | 6  | 0.00  | 0.00  | 0.00  | 0.00  | 0.00  | 0.00  | 0.00  | 0.00  | 0.00  |
| 6    | 6  | 0.03  | -0.02 | 0.00  | 0.00  | 0.00  | 0.00  | 0.00  | 0.00  | 0.00  |
| 7    | 6  | 0.00  | 0.00  | 0.00  | 0.00  | 0.01  | 0.00  | 0.00  | 0.00  | 0.00  |
| 8    | 6  | 0.00  | 0.00  | 0.00  | 0.00  | 0.00  | 0.00  | 0.00  | 0.00  | 0.00  |
| 9    | 6  | 0.00  | 0.00  | 0.00  | 0.00  | 0.00  | 0.00  | 0.00  | 0.00  | 0.00  |
| 10   | 6  | 0.00  | -0.03 | 0.00  | 0.00  | 0.00  | 0.00  | 0.00  | 0.00  | 0.00  |
| 11   | 1  | -0.28 | 0.21  | 0.00  | 0.00  | 0.00  | 0.00  | 0.00  | 0.00  | 0.00  |
| 12   | 8  | 0.00  | 0.00  | 0.00  | 0.00  | 0.00  | 0.00  | 0.00  | 0.00  | 0.00  |
| 13   | 8  | 0.00  | 0.00  | 0.00  | -0.06 | -0.03 | 0.00  | -0.01 | 0.00  | 0.00  |
| 14   | 6  | -0.07 | -0.03 | 0.00  | 0.00  | 0.00  | 0.00  | 0.00  | 0.00  | 0.00  |
| 15   | 6  | 0.00  | 0.00  | 0.00  | 0.00  | 0.00  | 0.00  | 0.00  | 0.00  | 0.00  |
| 16   | 8  | 0.00  | 0.00  | 0.00  | 0.00  | 0.00  | 0.00  | 0.00  | 0.00  | 0.00  |
| 17   | 8  | 0.00  | 0.00  | 0.00  | 0.00  | 0.00  | 0.00  | 0.00  | 0.00  | 0.00  |
| 18   | 1  | 0.05  | 0.36  | -0.01 | 0.00  | 0.00  | 0.00  | 0.00  | 0.00  | 0.00  |
| 19   | 1  | 0.00  | 0.00  | 0.00  | 0.91  | 0.39  | -0.04 | 0.09  | 0.04  | 0.00  |
| 20   | 1  | 0.80  | 0.32  | 0.00  | 0.00  | 0.00  | 0.00  | 0.00  | 0.00  | 0.00  |
| 21   | 8  | 0.00  | 0.00  | 0.00  | 0.00  | 0.00  | 0.00  | 0.00  | 0.00  | 0.00  |
| 22   | 8  | 0.00  | 0.00  | 0.00  | 0.00  | 0.00  | 0.00  | 0.00  | 0.00  | 0.00  |
| 23   | 1  | 0.00  | 0.00  | 0.00  | 0.00  | 0.00  | 0.00  | 0.00  | 0.00  | 0.00  |
| 24   | 1  | 0.00  | 0.00  | 0.00  | 0.00  | 0.00  | 0.00  | 0.00  | -0.01 | 0.00  |

64

65

66

A

A

A

|                |           |           |           |
|----------------|-----------|-----------|-----------|
| Frequencies -- | 3843.0819 | 3850.7727 | 3970.9454 |
|----------------|-----------|-----------|-----------|

|                |        |        |        |
|----------------|--------|--------|--------|
| Red. masses -- | 1.0642 | 1.0648 | 1.0735 |
|----------------|--------|--------|--------|

|                |          |          |          |
|----------------|----------|----------|----------|
| Frc consts --  | 9.2601   | 9.3025   | 9.9735   |
| IR Inten --    | 100.2021 | 124.7358 | 125.3352 |
| Raman Activ -- | 120.9480 | 133.8817 | 68.3900  |
| Depolar (P) -- | 0.2779   | 0.2384   | 0.3001   |
| Depolar (U) -- | 0.4350   | 0.3850   | 0.4617   |
| Atom AN        | X        | Y        | Z        |
| 1 8            | 0.00     | 0.00     | 0.00     |
| 2 1            | 0.00     | 0.00     | 0.00     |
| 3 1            | 0.00     | 0.00     | 0.00     |
| 4 6            | 0.00     | 0.00     | 0.00     |
| 5 6            | 0.00     | 0.00     | 0.00     |
| 6 6            | 0.00     | 0.00     | 0.00     |
| 7 6            | 0.00     | 0.00     | 0.00     |
| 8 6            | 0.00     | 0.00     | 0.00     |
| 9 6            | 0.00     | 0.00     | 0.00     |
| 10 6           | 0.00     | 0.00     | 0.00     |
| 11 1           | 0.00     | 0.00     | 0.00     |
| 12 8           | 0.00     | 0.00     | 0.00     |
| 13 8           | 0.00     | 0.00     | 0.00     |
| 14 6           | 0.00     | 0.00     | 0.00     |
| 15 6           | 0.00     | 0.00     | 0.00     |
| 16 8           | 0.00     | 0.00     | 0.00     |
| 17 8           | 0.01     | 0.06     | -0.01    |
| 18 1           | 0.00     | 0.00     | 0.00     |
| 19 1           | 0.00     | 0.00     | 0.00     |
| 20 1           | 0.00     | 0.00     | 0.00     |
| 21 8           | 0.00     | 0.00     | 0.00     |
| 22 8           | 0.00     | 0.00     | 0.00     |
| 23 1           | -0.03    | 0.03     | 0.00     |
| 24 1           | -0.10    | -0.98    | 0.13     |

## PYRHEM H2O

Harmonic frequencies (cm<sup>-1</sup>), IR intensities (KM/Mole), Raman scattering activities (A<sup>4</sup>/AMU), depolarization ratios for plane and unpolarized incident light, reduced masses (AMU), force constants (mDyne/A), and normal coordinates:

|                | 1       | 2       | 3       |
|----------------|---------|---------|---------|
|                | A       | A       | A       |
| Frequencies -- | 18.3350 | 25.5591 | 37.1620 |
| Red. masses -- | 6.6994  | 8.1349  | 7.2656  |
| Frc consts --  | 0.0013  | 0.0031  | 0.0059  |
| IR Inten --    | 1.8844  | 2.0622  | 0.8942  |
| Raman Activ -- | 1.4893  | 1.2673  | 2.0050  |
| Depolar (P) -- | 0.7499  | 0.7344  | 0.7443  |
| Depolar (U) -- | 0.8571  | 0.8469  | 0.8534  |
| Atom AN        | X       | Y       | Z       |
| 1 6            | -0.05   | 0.01    | 0.00    |
| 2 6            | 0.00    | 0.05    | 0.00    |
| 3 6            | -0.05   | -0.06   | 0.01    |
| 4 6            | -0.12   | 0.04    | -0.02   |
| 5 6            | 0.07    | 0.02    | 0.01    |
| 6 6            | 0.00    | 0.12    | -0.02   |
| 7 6            | 0.01    | -0.09   | 0.02    |
| 8 1            | -0.10   | -0.09   | 0.00    |
| 9 8            | -0.12   | 0.09    | 0.00    |
| 10 8           | -0.17   | 0.02    | -0.04   |
| 11 6           | 0.07    | -0.06   | 0.02    |
| 12 6           | 0.13    | 0.05    | 0.02    |
| 13 8           | 0.00    | 0.13    | -0.02   |

|    |   |       |       |       |       |       |       |       |       |       |
|----|---|-------|-------|-------|-------|-------|-------|-------|-------|-------|
| 14 | 8 | 0.00  | 0.13  | -0.02 | 0.03  | -0.02 | 0.01  | -0.03 | -0.13 | 0.03  |
| 15 | 1 | 0.01  | -0.15 | 0.03  | 0.02  | 0.03  | -0.02 | -0.02 | -0.03 | -0.04 |
| 16 | 1 | -0.21 | 0.04  | -0.05 | 0.10  | -0.01 | 0.19  | -0.01 | -0.05 | 0.21  |
| 17 | 1 | 0.11  | -0.08 | 0.04  | 0.02  | 0.04  | -0.10 | 0.00  | -0.02 | -0.05 |
| 18 | 8 | 0.14  | 0.11  | 0.01  | 0.00  | 0.02  | 0.03  | -0.05 | -0.01 | 0.24  |
| 19 | 8 | 0.18  | 0.01  | 0.03  | 0.06  | 0.07  | -0.21 | 0.08  | 0.03  | -0.18 |
| 20 | 1 | 0.22  | 0.04  | 0.03  | 0.05  | 0.06  | -0.21 | 0.07  | 0.03  | -0.12 |
| 21 | 8 | -0.06 | 0.11  | -0.01 | -0.39 | -0.37 | 0.00  | 0.31  | 0.07  | -0.06 |
| 22 | 1 | -0.03 | 0.12  | -0.03 | -0.23 | -0.28 | 0.03  | 0.23  | 0.02  | -0.09 |
| 23 | 7 | 0.00  | -0.07 | 0.00  | 0.01  | 0.05  | 0.03  | -0.01 | 0.12  | -0.05 |
| 24 | 1 | 0.01  | 0.01  | -0.01 | 0.01  | 0.09  | 0.02  | 0.00  | 0.21  | -0.05 |
| 25 | 7 | 0.00  | -0.02 | -0.01 | 0.03  | -0.02 | 0.04  | -0.03 | -0.11 | -0.01 |
| 26 | 1 | 0.00  | 0.11  | -0.02 | 0.03  | -0.02 | 0.02  | -0.02 | -0.14 | 0.02  |
| 27 | 6 | 0.00  | -0.17 | 0.01  | 0.04  | -0.08 | 0.07  | -0.05 | -0.21 | -0.02 |
| 28 | 1 | -0.01 | -0.16 | 0.01  | 0.05  | -0.13 | 0.08  | -0.07 | -0.40 | 0.00  |
| 29 | 6 | 0.00  | -0.32 | 0.03  | 0.02  | -0.05 | 0.08  | -0.03 | -0.04 | -0.07 |
| 30 | 1 | 0.00  | -0.46 | 0.04  | 0.03  | -0.08 | 0.09  | -0.03 | -0.06 | -0.09 |
| 31 | 6 | 0.01  | -0.25 | 0.02  | 0.01  | 0.03  | 0.05  | 0.00  | 0.17  | -0.09 |
| 32 | 1 | 0.01  | -0.31 | 0.03  | 0.00  | 0.07  | 0.05  | 0.02  | 0.35  | -0.12 |
| 33 | 1 | -0.09 | 0.11  | 0.00  | -0.34 | -0.26 | -0.12 | 0.14  | -0.03 | 0.11  |

4                      5                      6  
A                      A                      A

Frequencies --    47.0392                      50.9376                      59.1803  
Red. masses --    6.4150                      7.5464                      4.9898  
Frc consts --    0.0084                      0.0115                      0.0103  
IR Inten --    5.5976                      3.4451                      0.5078  
Raman Activ --    3.2536                      0.1783                      2.4845  
Depolar (P) --    0.7475                      0.7021                      0.7494  
Depolar (U) --    0.8555                      0.8250                      0.8568

| Atom | AN | X     | Y     | Z     | X     | Y     | Z     | X     | Y     | Z     |
|------|----|-------|-------|-------|-------|-------|-------|-------|-------|-------|
| 1    | 6  | -0.01 | -0.01 | 0.04  | 0.01  | -0.01 | -0.07 | -0.01 | 0.01  | 0.01  |
| 2    | 6  | -0.01 | -0.01 | -0.04 | 0.00  | -0.01 | -0.07 | -0.01 | 0.01  | 0.03  |
| 3    | 6  | 0.00  | -0.02 | 0.22  | 0.01  | 0.01  | -0.12 | -0.01 | 0.00  | -0.01 |
| 4    | 6  | 0.00  | -0.01 | -0.06 | 0.01  | -0.01 | 0.04  | -0.01 | 0.01  | -0.01 |
| 5    | 6  | -0.01 | -0.01 | 0.02  | -0.01 | -0.01 | -0.05 | -0.01 | 0.01  | 0.02  |
| 6    | 6  | -0.01 | 0.01  | -0.09 | 0.00  | 0.01  | -0.06 | -0.01 | 0.01  | 0.04  |
| 7    | 6  | -0.01 | -0.02 | 0.32  | 0.00  | 0.01  | -0.16 | -0.01 | 0.00  | -0.02 |
| 8    | 1  | 0.00  | -0.02 | 0.30  | 0.01  | 0.01  | -0.12 | -0.02 | 0.00  | -0.02 |
| 9    | 8  | -0.06 | -0.02 | -0.20 | -0.08 | 0.08  | -0.11 | -0.05 | 0.02  | -0.08 |
| 10   | 8  | 0.07  | 0.00  | 0.03  | 0.12  | -0.13 | 0.36  | 0.02  | 0.00  | 0.05  |
| 11   | 6  | -0.02 | -0.02 | 0.20  | -0.01 | 0.00  | -0.10 | 0.00  | 0.00  | -0.01 |
| 12   | 6  | -0.01 | 0.00  | -0.09 | -0.01 | -0.02 | 0.06  | 0.00  | 0.01  | 0.04  |
| 13   | 8  | -0.02 | 0.02  | -0.08 | -0.02 | 0.03  | -0.06 | -0.01 | 0.03  | 0.03  |
| 14   | 8  | 0.01  | 0.02  | -0.08 | 0.01  | 0.03  | -0.06 | -0.01 | -0.01 | 0.04  |
| 15   | 1  | -0.01 | -0.03 | 0.47  | 0.00  | 0.02  | -0.22 | -0.01 | 0.00  | -0.03 |
| 16   | 1  | 0.07  | 0.00  | -0.05 | 0.10  | -0.12 | 0.43  | 0.01  | 0.00  | 0.03  |
| 17   | 1  | -0.02 | -0.02 | 0.26  | -0.01 | 0.01  | -0.08 | 0.00  | 0.00  | -0.02 |
| 18   | 8  | 0.02  | -0.01 | -0.20 | 0.03  | 0.04  | -0.09 | -0.03 | 0.00  | 0.16  |
| 19   | 8  | -0.05 | 0.00  | -0.05 | -0.07 | -0.09 | 0.38  | 0.05  | 0.03  | -0.09 |
| 20   | 1  | -0.04 | 0.00  | -0.13 | -0.06 | -0.08 | 0.43  | 0.04  | 0.03  | -0.07 |
| 21   | 8  | 0.14  | 0.01  | -0.19 | 0.02  | 0.05  | -0.09 | 0.14  | -0.13 | -0.08 |
| 22   | 1  | 0.13  | -0.01 | -0.23 | 0.04  | 0.04  | -0.15 | 0.10  | -0.10 | 0.04  |
| 23   | 7  | -0.04 | 0.01  | 0.05  | -0.01 | 0.00  | 0.00  | 0.00  | -0.17 | 0.02  |
| 24   | 1  | -0.07 | 0.01  | 0.01  | -0.02 | 0.00  | -0.02 | 0.02  | -0.25 | 0.05  |
| 25   | 7  | 0.01  | 0.03  | 0.04  | 0.01  | 0.06  | -0.01 | -0.03 | 0.16  | -0.03 |
| 26   | 1  | 0.00  | 0.02  | -0.05 | 0.01  | 0.05  | -0.04 | -0.01 | 0.07  | 0.02  |
| 27   | 6  | 0.03  | 0.02  | 0.09  | 0.02  | 0.04  | 0.01  | -0.04 | 0.28  | -0.08 |
| 28   | 1  | 0.08  | 0.03  | 0.09  | 0.04  | 0.07  | 0.01  | -0.07 | 0.53  | -0.12 |
| 29   | 6  | -0.01 | 0.00  | 0.14  | 0.00  | -0.03 | 0.04  | -0.02 | 0.03  | -0.06 |
| 30   | 1  | 0.00  | -0.01 | 0.18  | 0.00  | -0.05 | 0.06  | -0.02 | 0.05  | -0.09 |

|                |   |          |       |       |       |          |       |       |          |       |
|----------------|---|----------|-------|-------|-------|----------|-------|-------|----------|-------|
| 31             | 6 | -0.06    | -0.01 | 0.11  | -0.02 | -0.05    | 0.03  | 0.01  | -0.26    | 0.00  |
| 32             | 1 | -0.10    | -0.02 | 0.12  | -0.04 | -0.09    | 0.04  | 0.04  | -0.50    | 0.03  |
| 33             | 1 | 0.01     | -0.05 | -0.09 | -0.08 | -0.01    | 0.01  | 0.03  | -0.08    | -0.09 |
|                |   | 7        |       |       | 8     |          |       | 9     |          |       |
|                |   | A        |       |       | A     |          |       | A     |          |       |
| Frequencies -- |   | 80.2923  |       |       |       | 89.0854  |       |       | 113.8383 |       |
| Red. masses -- |   | 7.6674   |       |       |       | 6.0257   |       |       | 7.1191   |       |
| Frc consts --  |   | 0.0291   |       |       |       | 0.0282   |       |       | 0.0544   |       |
| IR Inten --    |   | 3.1125   |       |       |       | 0.5650   |       |       | 0.5590   |       |
| Raman Activ -- |   | 0.6107   |       |       |       | 2.0937   |       |       | 0.2363   |       |
| Depolar (P) -- |   | 0.6984   |       |       |       | 0.7494   |       |       | 0.7482   |       |
| Depolar (U) -- |   | 0.8224   |       |       |       | 0.8568   |       |       | 0.8560   |       |
| Atom AN        |   | X        | Y     | Z     | X     | Y        | Z     | X     | Y        | Z     |
| 1              | 6 | 0.03     | -0.02 | -0.05 | -0.02 | 0.03     | 0.00  | 0.04  | 0.01     | 0.00  |
| 2              | 6 | 0.01     | -0.03 | -0.05 | 0.00  | 0.05     | -0.01 | 0.02  | 0.01     | -0.01 |
| 3              | 6 | 0.03     | -0.01 | -0.01 | -0.02 | 0.01     | 0.01  | 0.04  | 0.01     | 0.00  |
| 4              | 6 | 0.04     | -0.03 | -0.07 | -0.06 | 0.05     | 0.00  | 0.11  | -0.02    | 0.04  |
| 5              | 6 | 0.00     | -0.02 | 0.01  | 0.02  | 0.04     | -0.01 | 0.05  | 0.00     | -0.01 |
| 6              | 6 | 0.01     | -0.04 | -0.10 | 0.00  | 0.03     | -0.01 | 0.00  | 0.02     | -0.04 |
| 7              | 6 | 0.01     | 0.00  | 0.04  | 0.00  | 0.00     | 0.01  | 0.05  | 0.00     | 0.00  |
| 8              | 1 | 0.04     | 0.00  | -0.01 | -0.04 | 0.00     | 0.01  | 0.03  | 0.00     | 0.01  |
| 9              | 8 | 0.03     | -0.03 | -0.12 | -0.08 | 0.09     | -0.02 | 0.16  | -0.10    | 0.11  |
| 10             | 8 | 0.09     | -0.03 | -0.01 | -0.07 | 0.02     | 0.04  | 0.15  | 0.02     | 0.01  |
| 11             | 6 | 0.00     | -0.02 | 0.05  | 0.02  | 0.01     | 0.00  | 0.05  | 0.00     | 0.00  |
| 12             | 6 | -0.01    | -0.03 | 0.09  | 0.04  | 0.05     | -0.01 | 0.11  | 0.04     | 0.02  |
| 13             | 8 | 0.02     | 0.02  | -0.12 | 0.00  | -0.02    | 0.00  | 0.00  | -0.02    | -0.03 |
| 14             | 8 | -0.01    | -0.11 | -0.10 | 0.00  | 0.02     | 0.00  | -0.03 | 0.05     | -0.05 |
| 15             | 1 | 0.01     | 0.00  | 0.07  | 0.00  | -0.02    | 0.01  | 0.05  | 0.00     | 0.00  |
| 16             | 1 | 0.10     | -0.04 | -0.02 | -0.10 | 0.04     | 0.04  | 0.22  | -0.01    | 0.06  |
| 17             | 1 | -0.01    | -0.02 | 0.09  | 0.04  | 0.00     | 0.00  | 0.05  | -0.01    | 0.00  |
| 18             | 8 | -0.06    | -0.05 | 0.30  | 0.05  | 0.07     | -0.06 | 0.11  | 0.10     | 0.04  |
| 19             | 8 | 0.05     | -0.01 | -0.07 | 0.04  | 0.03     | 0.04  | 0.18  | 0.00     | 0.01  |
| 20             | 1 | 0.03     | -0.02 | 0.02  | 0.06  | 0.04     | 0.03  | 0.22  | 0.03     | 0.03  |
| 21             | 8 | -0.25    | 0.37  | 0.02  | 0.02  | -0.04    | -0.02 | 0.03  | -0.06    | -0.03 |
| 22             | 1 | -0.23    | 0.20  | -0.41 | 0.05  | -0.01    | 0.01  | -0.01 | -0.01    | 0.14  |
| 23             | 7 | -0.03    | -0.11 | 0.00  | 0.01  | -0.34    | 0.05  | -0.28 | -0.03    | -0.06 |
| 24             | 1 | -0.06    | -0.14 | -0.05 | 0.02  | -0.40    | 0.06  | -0.33 | -0.04    | -0.13 |
| 25             | 7 | 0.05     | -0.04 | -0.02 | 0.01  | -0.37    | 0.05  | -0.19 | -0.05    | -0.07 |
| 26             | 1 | -0.02    | -0.09 | -0.09 | 0.01  | -0.14    | 0.02  | -0.01 | 0.01     | -0.09 |
| 27             | 6 | 0.08     | 0.08  | 0.04  | 0.01  | -0.02    | 0.00  | -0.15 | -0.02    | 0.00  |
| 28             | 1 | 0.15     | 0.15  | 0.04  | 0.02  | 0.03     | -0.01 | -0.09 | -0.02    | 0.01  |
| 29             | 6 | 0.02     | 0.09  | 0.10  | 0.01  | 0.27     | -0.05 | -0.23 | 0.03     | 0.06  |
| 30             | 1 | 0.03     | 0.17  | 0.16  | 0.01  | 0.60     | -0.09 | -0.22 | 0.06     | 0.13  |
| 31             | 6 | -0.05    | -0.04 | 0.07  | 0.01  | 0.06     | -0.01 | -0.31 | 0.02     | 0.01  |
| 32             | 1 | -0.12    | -0.07 | 0.10  | 0.01  | 0.16     | -0.03 | -0.38 | 0.04     | 0.03  |
| 33             | 1 | -0.07    | 0.08  | 0.23  | -0.05 | -0.01    | -0.02 | 0.06  | 0.06     | -0.16 |
|                |   | 10       |       |       | 11    |          |       | 12    |          |       |
|                |   | A        |       |       | A     |          |       | A     |          |       |
| Frequencies -- |   | 119.7274 |       |       |       | 133.0046 |       |       | 152.6129 |       |
| Red. masses -- |   | 6.4523   |       |       |       | 6.9995   |       |       | 6.2847   |       |
| Frc consts --  |   | 0.0545   |       |       |       | 0.0730   |       |       | 0.0862   |       |
| IR Inten --    |   | 5.5793   |       |       |       | 8.7054   |       |       | 8.1280   |       |
| Raman Activ -- |   | 0.3566   |       |       |       | 0.4360   |       |       | 0.1315   |       |
| Depolar (P) -- |   | 0.5262   |       |       |       | 0.6842   |       |       | 0.6707   |       |
| Depolar (U) -- |   | 0.6896   |       |       |       | 0.8125   |       |       | 0.8029   |       |
| Atom AN        |   | X        | Y     | Z     | X     | Y        | Z     | X     | Y        | Z     |
| 1              | 6 | -0.01    | 0.02  | -0.02 | -0.04 | 0.00     | 0.05  | -0.01 | 0.00     | 0.06  |
| 2              | 6 | 0.00     | 0.02  | -0.10 | -0.03 | 0.01     | 0.02  | -0.01 | -0.01    | 0.15  |
| 3              | 6 | -0.01    | 0.01  | 0.05  | -0.04 | 0.00     | 0.04  | -0.01 | 0.00     | -0.05 |
| 4              | 6 | -0.04    | 0.04  | 0.05  | -0.02 | -0.01    | 0.11  | -0.02 | 0.00     | -0.05 |



|    |   |       |       |       |       |       |       |       |       |       |
|----|---|-------|-------|-------|-------|-------|-------|-------|-------|-------|
| 5  | 6 | -0.01 | 0.02  | -0.07 | -0.03 | 0.01  | 0.00  | 0.00  | -0.01 | 0.10  |
| 6  | 6 | 0.01  | 0.00  | -0.14 | -0.02 | 0.00  | 0.00  | -0.01 | -0.01 | 0.18  |
| 7  | 6 | -0.01 | 0.01  | 0.06  | -0.04 | 0.01  | -0.02 | -0.01 | 0.00  | -0.07 |
| 8  | 1 | 0.00  | 0.00  | 0.11  | -0.04 | 0.00  | 0.07  | -0.01 | 0.01  | -0.13 |
| 9  | 8 | -0.01 | 0.09  | 0.17  | 0.03  | -0.05 | 0.22  | -0.08 | -0.01 | -0.19 |
| 10 | 8 | -0.14 | 0.00  | 0.00  | -0.07 | 0.01  | 0.03  | 0.05  | 0.02  | 0.00  |
| 11 | 6 | -0.01 | 0.02  | 0.01  | -0.03 | 0.01  | -0.03 | 0.00  | 0.00  | 0.01  |
| 12 | 6 | -0.03 | 0.01  | 0.00  | -0.03 | 0.01  | 0.05  | 0.01  | 0.00  | 0.00  |
| 13 | 8 | 0.01  | 0.10  | -0.17 | 0.02  | -0.16 | 0.01  | -0.02 | -0.04 | 0.20  |
| 14 | 8 | 0.02  | -0.14 | -0.12 | -0.04 | 0.15  | -0.04 | -0.02 | 0.04  | 0.17  |
| 15 | 1 | -0.01 | 0.01  | 0.13  | -0.04 | 0.01  | -0.05 | 0.00  | 0.01  | -0.16 |
| 16 | 1 | -0.16 | 0.02  | 0.07  | -0.04 | 0.00  | 0.09  | 0.03  | 0.02  | -0.11 |
| 17 | 1 | -0.01 | 0.01  | 0.04  | -0.03 | 0.01  | -0.06 | 0.00  | 0.00  | -0.04 |
| 18 | 8 | -0.04 | 0.01  | 0.04  | -0.06 | 0.02  | 0.15  | 0.03  | -0.01 | -0.09 |
| 19 | 8 | -0.04 | 0.00  | 0.05  | 0.00  | 0.01  | -0.01 | 0.00  | 0.02  | -0.03 |
| 20 | 1 | -0.06 | -0.01 | 0.12  | 0.00  | 0.01  | 0.04  | 0.01  | 0.03  | -0.14 |
| 21 | 8 | 0.10  | -0.16 | 0.22  | -0.03 | -0.04 | -0.42 | 0.01  | 0.05  | 0.07  |
| 22 | 1 | 0.14  | -0.13 | 0.25  | -0.04 | 0.07  | -0.13 | -0.04 | -0.04 | -0.08 |
| 23 | 7 | -0.05 | -0.02 | -0.13 | 0.04  | 0.02  | -0.08 | -0.09 | -0.02 | -0.21 |
| 24 | 1 | -0.11 | -0.02 | -0.23 | 0.01  | -0.01 | -0.13 | -0.16 | -0.04 | -0.30 |
| 25 | 7 | 0.12  | 0.02  | -0.16 | 0.13  | -0.02 | -0.09 | 0.11  | -0.03 | -0.24 |
| 26 | 1 | 0.01  | -0.10 | -0.15 | -0.06 | 0.09  | -0.08 | -0.02 | 0.01  | 0.02  |
| 27 | 6 | 0.19  | 0.05  | 0.00  | 0.18  | -0.03 | 0.01  | 0.20  | -0.01 | -0.04 |
| 28 | 1 | 0.33  | 0.08  | 0.01  | 0.26  | -0.06 | 0.03  | 0.37  | -0.02 | -0.02 |
| 29 | 6 | 0.06  | 0.01  | 0.13  | 0.10  | 0.00  | 0.08  | 0.04  | 0.01  | 0.11  |
| 30 | 1 | 0.07  | 0.01  | 0.27  | 0.11  | 0.00  | 0.16  | 0.05  | 0.02  | 0.28  |
| 31 | 6 | -0.09 | -0.03 | 0.04  | 0.01  | 0.03  | 0.02  | -0.15 | 0.00  | -0.01 |
| 32 | 1 | -0.24 | -0.06 | 0.09  | -0.07 | 0.06  | 0.04  | -0.32 | 0.01  | 0.05  |
| 33 | 1 | 0.14  | -0.11 | 0.15  | -0.15 | 0.16  | -0.56 | 0.03  | -0.10 | 0.21  |

13

14

15

A

A

A

|                |          |          |          |
|----------------|----------|----------|----------|
| Frequencies -- | 162.6090 | 170.4141 | 179.4523 |
| Red. masses -- | 7.1698   | 7.6017   | 5.4787   |
| Frc consts --  | 0.1117   | 0.1301   | 0.1039   |
| IR Inten --    | 2.7701   | 2.5910   | 0.5201   |
| Raman Activ -- | 1.7756   | 0.6961   | 0.7754   |
| Depolar (P) -- | 0.7491   | 0.7424   | 0.7168   |
| Depolar (U) -- | 0.8565   | 0.8522   | 0.8350   |

| Atom | AN | X     | Y     | Z     | X     | Y     | Z     | X     | Y     | Z     |
|------|----|-------|-------|-------|-------|-------|-------|-------|-------|-------|
| 1    | 6  | 0.09  | 0.03  | -0.16 | -0.11 | 0.00  | -0.15 | 0.03  | 0.00  | 0.14  |
| 2    | 6  | 0.07  | 0.00  | -0.04 | -0.11 | 0.01  | -0.11 | 0.03  | 0.01  | -0.03 |
| 3    | 6  | 0.09  | 0.03  | -0.16 | -0.11 | 0.00  | -0.08 | 0.03  | -0.02 | 0.28  |
| 4    | 6  | -0.01 | 0.09  | -0.07 | 0.00  | -0.06 | -0.08 | -0.03 | 0.03  | 0.00  |
| 5    | 6  | 0.05  | 0.00  | 0.10  | -0.11 | 0.01  | -0.01 | 0.02  | 0.02  | -0.18 |
| 6    | 6  | 0.06  | -0.09 | -0.03 | -0.10 | 0.00  | -0.06 | 0.03  | -0.07 | -0.02 |
| 7    | 6  | 0.07  | 0.03  | 0.05  | -0.11 | -0.02 | 0.07  | 0.03  | 0.01  | 0.01  |
| 8    | 1  | 0.09  | 0.04  | -0.28 | -0.12 | 0.01  | -0.09 | 0.03  | -0.04 | 0.50  |
| 9    | 8  | -0.05 | 0.29  | -0.04 | 0.03  | -0.16 | -0.07 | -0.09 | 0.05  | -0.15 |
| 10   | 8  | -0.13 | -0.08 | 0.06  | 0.15  | -0.03 | 0.05  | -0.02 | 0.07  | -0.05 |
| 11   | 6  | 0.05  | 0.00  | 0.20  | -0.11 | -0.02 | 0.10  | 0.02  | 0.04  | -0.27 |
| 12   | 6  | 0.00  | -0.03 | 0.05  | -0.01 | 0.08  | 0.02  | 0.01  | 0.01  | -0.02 |
| 13   | 8  | 0.06  | -0.32 | 0.02  | -0.13 | -0.20 | 0.00  | 0.02  | -0.24 | 0.02  |
| 14   | 8  | 0.07  | 0.10  | -0.05 | -0.04 | 0.20  | -0.07 | 0.04  | 0.04  | -0.03 |
| 15   | 1  | 0.07  | 0.04  | 0.11  | -0.11 | -0.03 | 0.16  | 0.03  | 0.02  | 0.04  |
| 16   | 1  | -0.24 | -0.01 | 0.16  | 0.26  | -0.09 | 0.14  | -0.07 | 0.09  | -0.22 |
| 17   | 1  | 0.04  | 0.00  | 0.36  | -0.10 | -0.04 | 0.21  | 0.02  | 0.05  | -0.47 |
| 18   | 8  | -0.01 | -0.12 | 0.07  | -0.01 | 0.22  | 0.07  | -0.03 | 0.04  | 0.12  |
| 19   | 8  | -0.04 | 0.04  | -0.07 | 0.14  | 0.00  | -0.03 | 0.03  | -0.04 | 0.08  |
| 20   | 1  | -0.08 | 0.01  | -0.12 | 0.23  | 0.07  | -0.01 | 0.02  | -0.04 | 0.25  |
| 21   | 8  | 0.01  | -0.03 | 0.03  | 0.06  | -0.05 | 0.22  | 0.02  | 0.00  | 0.07  |

|    |   |       |       |       |       |       |       |       |       |       |
|----|---|-------|-------|-------|-------|-------|-------|-------|-------|-------|
| 22 | 1 | 0.07  | 0.11  | 0.27  | 0.11  | 0.03  | 0.38  | 0.08  | 0.01  | 0.02  |
| 23 | 7 | -0.06 | 0.06  | 0.00  | 0.10  | 0.03  | 0.00  | -0.02 | 0.04  | 0.00  |
| 24 | 1 | -0.07 | 0.00  | 0.00  | 0.11  | -0.01 | 0.03  | -0.02 | -0.01 | 0.01  |
| 25 | 7 | -0.06 | 0.02  | 0.00  | 0.07  | 0.00  | 0.01  | -0.02 | 0.02  | 0.00  |
| 26 | 1 | 0.09  | 0.05  | -0.03 | -0.05 | 0.13  | -0.01 | 0.04  | 0.02  | -0.01 |
| 27 | 6 | -0.06 | -0.03 | 0.01  | 0.07  | -0.03 | 0.00  | -0.03 | -0.01 | 0.00  |
| 28 | 1 | -0.06 | -0.05 | 0.01  | 0.06  | -0.05 | 0.00  | -0.03 | -0.03 | 0.00  |
| 29 | 6 | -0.06 | -0.03 | 0.01  | 0.09  | -0.01 | -0.02 | -0.02 | -0.02 | 0.00  |
| 30 | 1 | -0.06 | -0.07 | 0.01  | 0.09  | -0.03 | -0.03 | -0.02 | -0.05 | 0.00  |
| 31 | 6 | -0.06 | 0.02  | 0.00  | 0.11  | 0.02  | -0.01 | -0.02 | 0.01  | 0.00  |
| 32 | 1 | -0.06 | 0.03  | 0.00  | 0.12  | 0.04  | -0.02 | -0.01 | 0.01  | -0.01 |
| 33 | 1 | -0.05 | 0.19  | -0.17 | 0.05  | 0.08  | 0.09  | -0.06 | -0.03 | 0.13  |

|                | 16       | 17       | 18       |
|----------------|----------|----------|----------|
|                | A        | A        | A        |
| Frequencies -- | 199.5587 | 213.6309 | 228.2911 |
| Red. masses -- | 2.2344   | 1.7702   | 6.9915   |
| Frc consts --  | 0.0524   | 0.0476   | 0.2147   |
| IR Inten --    | 27.4594  | 31.6942  | 19.1316  |
| Raman Activ -- | 0.4247   | 0.4655   | 1.9438   |
| Depolar (P) -- | 0.4392   | 0.5837   | 0.6914   |
| Depolar (U) -- | 0.6103   | 0.7371   | 0.8175   |

| Atom | AN | X     | Y     | Z     | X     | Y     | Z     | X     | Y     | Z     |
|------|----|-------|-------|-------|-------|-------|-------|-------|-------|-------|
| 1    | 6  | 0.01  | -0.02 | 0.00  | 0.00  | 0.00  | -0.04 | -0.03 | -0.02 | 0.18  |
| 2    | 6  | 0.02  | -0.01 | -0.02 | 0.02  | 0.01  | -0.05 | 0.00  | 0.00  | 0.20  |
| 3    | 6  | 0.01  | -0.03 | 0.03  | 0.00  | -0.01 | 0.00  | -0.03 | -0.01 | -0.03 |
| 4    | 6  | 0.01  | -0.02 | -0.02 | 0.00  | -0.01 | 0.00  | -0.04 | -0.01 | 0.05  |
| 5    | 6  | 0.02  | -0.02 | -0.03 | 0.02  | 0.00  | -0.04 | 0.02  | -0.01 | 0.21  |
| 6    | 6  | 0.01  | 0.08  | 0.00  | 0.01  | 0.06  | -0.01 | 0.02  | 0.04  | -0.08 |
| 7    | 6  | 0.02  | -0.03 | 0.01  | 0.01  | -0.02 | 0.03  | -0.01 | -0.01 | -0.18 |
| 8    | 1  | 0.01  | -0.03 | 0.06  | 0.00  | -0.02 | 0.02  | -0.04 | 0.00  | -0.15 |
| 9    | 8  | 0.01  | -0.03 | -0.04 | 0.02  | -0.01 | 0.04  | -0.08 | -0.10 | -0.07 |
| 10   | 8  | 0.03  | -0.02 | -0.01 | 0.00  | -0.02 | 0.00  | 0.03  | 0.06  | 0.00  |
| 11   | 6  | 0.02  | -0.02 | -0.03 | 0.02  | -0.01 | 0.00  | 0.02  | 0.00  | 0.01  |
| 12   | 6  | -0.03 | -0.05 | 0.00  | -0.01 | -0.02 | 0.00  | 0.00  | -0.01 | 0.07  |
| 13   | 8  | -0.01 | 0.11  | 0.01  | -0.04 | 0.03  | 0.03  | 0.26  | -0.05 | -0.21 |
| 14   | 8  | 0.04  | 0.15  | 0.00  | 0.06  | 0.15  | 0.01  | -0.18 | 0.16  | -0.21 |
| 15   | 1  | 0.02  | -0.04 | 0.03  | 0.01  | -0.03 | 0.07  | -0.01 | -0.01 | -0.44 |
| 16   | 1  | 0.04  | -0.03 | -0.01 | 0.01  | -0.02 | 0.02  | 0.02  | 0.05  | -0.16 |
| 17   | 1  | 0.03  | -0.01 | -0.04 | 0.03  | -0.01 | 0.02  | 0.03  | 0.00  | -0.07 |
| 18   | 8  | -0.04 | -0.11 | 0.05  | -0.03 | -0.06 | 0.04  | 0.02  | -0.08 | -0.01 |
| 19   | 8  | -0.08 | -0.02 | 0.00  | -0.05 | 0.00  | 0.00  | -0.05 | 0.06  | -0.03 |
| 20   | 1  | -0.12 | -0.05 | 0.03  | -0.08 | -0.03 | 0.04  | -0.08 | 0.04  | -0.19 |
| 21   | 8  | 0.01  | -0.01 | 0.04  | 0.01  | -0.02 | 0.01  | 0.06  | -0.05 | 0.09  |
| 22   | 1  | 0.13  | 0.29  | 0.61  | -0.07 | -0.30 | -0.59 | -0.04 | -0.16 | -0.07 |
| 23   | 7  | -0.01 | -0.03 | -0.01 | -0.01 | -0.01 | -0.01 | 0.01  | 0.00  | 0.05  |
| 24   | 1  | -0.02 | -0.01 | -0.02 | -0.01 | -0.01 | -0.01 | 0.01  | 0.00  | 0.04  |
| 25   | 7  | 0.00  | -0.03 | -0.01 | -0.01 | -0.02 | -0.01 | -0.01 | -0.01 | 0.05  |
| 26   | 1  | 0.05  | 0.13  | 0.00  | 0.06  | 0.12  | 0.03  | -0.19 | 0.11  | -0.22 |
| 27   | 6  | 0.01  | -0.01 | 0.00  | -0.01 | -0.01 | -0.01 | -0.01 | 0.00  | 0.05  |
| 28   | 1  | 0.02  | -0.01 | 0.00  | -0.01 | -0.01 | -0.01 | -0.02 | -0.01 | 0.05  |
| 29   | 6  | 0.00  | 0.02  | 0.00  | -0.01 | 0.01  | -0.01 | 0.00  | 0.01  | 0.03  |
| 30   | 1  | 0.00  | 0.04  | 0.01  | -0.01 | 0.02  | -0.01 | 0.00  | 0.02  | 0.02  |
| 31   | 6  | -0.02 | 0.01  | 0.00  | -0.01 | 0.00  | -0.01 | 0.01  | 0.02  | 0.04  |
| 32   | 1  | -0.03 | 0.02  | 0.00  | -0.01 | 0.01  | -0.01 | 0.01  | 0.02  | 0.04  |
| 33   | 1  | -0.18 | 0.47  | -0.35 | 0.20  | -0.50 | 0.42  | 0.11  | -0.22 | 0.24  |

|                | 19       | 20       | 21       |
|----------------|----------|----------|----------|
|                | A        | A        | A        |
| Frequencies -- | 279.3894 | 306.5745 | 322.7540 |
| Red. masses -- | 6.3331   | 2.5196   | 1.7798   |
| Frc consts --  | 0.2913   | 0.1395   | 0.1092   |

|             |    |        |  |        |  |        |
|-------------|----|--------|--|--------|--|--------|
| IR Inten    | -- | 3.8274 |  | 1.8379 |  | 1.5651 |
| Raman Activ | -- | 0.8482 |  | 1.5572 |  | 1.4850 |
| Depolar (P) | -- | 0.7495 |  | 0.7080 |  | 0.4994 |
| Depolar (U) | -- | 0.8568 |  | 0.8290 |  | 0.6661 |

  

| Atom | AN | X     | Y     | Z     | X     | Y     | Z     | X     | Y     | Z     |
|------|----|-------|-------|-------|-------|-------|-------|-------|-------|-------|
| 1    | 6  | 0.15  | -0.09 | 0.06  | 0.01  | -0.05 | 0.01  | 0.01  | 0.02  | 0.04  |
| 2    | 6  | 0.01  | -0.17 | 0.09  | 0.05  | -0.01 | 0.00  | -0.03 | -0.02 | -0.01 |
| 3    | 6  | 0.14  | 0.06  | 0.04  | 0.01  | -0.01 | -0.01 | 0.01  | 0.03  | -0.01 |
| 4    | 6  | 0.10  | -0.06 | -0.01 | -0.03 | -0.08 | 0.01  | 0.01  | 0.05  | 0.04  |
| 5    | 6  | -0.15 | -0.10 | 0.04  | -0.01 | 0.04  | 0.02  | -0.01 | -0.04 | 0.02  |
| 6    | 6  | 0.01  | -0.05 | 0.03  | 0.09  | -0.01 | -0.01 | -0.05 | -0.01 | -0.03 |
| 7    | 6  | -0.01 | 0.15  | 0.01  | -0.03 | 0.02  | -0.02 | 0.01  | 0.02  | -0.03 |
| 8    | 1  | 0.26  | 0.13  | 0.03  | 0.05  | 0.02  | -0.02 | 0.00  | 0.02  | -0.03 |
| 9    | 8  | 0.05  | 0.14  | -0.03 | -0.03 | -0.11 | 0.00  | 0.01  | 0.06  | 0.02  |
| 10   | 8  | -0.09 | -0.19 | -0.06 | -0.05 | -0.10 | -0.02 | 0.03  | 0.10  | -0.01 |
| 11   | 6  | -0.15 | 0.05  | -0.01 | -0.01 | 0.04  | 0.02  | -0.02 | -0.01 | 0.03  |
| 12   | 6  | -0.11 | -0.06 | -0.01 | -0.03 | 0.07  | 0.01  | 0.01  | -0.06 | 0.00  |
| 13   | 8  | 0.04  | 0.12  | -0.02 | 0.08  | 0.00  | 0.00  | -0.08 | 0.00  | -0.01 |
| 14   | 8  | -0.03 | 0.14  | -0.02 | 0.14  | -0.01 | 0.02  | -0.01 | 0.02  | -0.02 |
| 15   | 1  | -0.02 | 0.31  | -0.02 | -0.03 | 0.03  | -0.05 | 0.01  | 0.04  | -0.08 |
| 16   | 1  | -0.29 | -0.08 | -0.11 | -0.08 | -0.08 | -0.01 | 0.06  | 0.08  | -0.07 |
| 17   | 1  | -0.25 | 0.10  | -0.07 | 0.00  | 0.03  | 0.04  | -0.05 | 0.00  | 0.05  |
| 18   | 8  | -0.08 | 0.18  | -0.02 | -0.03 | 0.11  | 0.00  | 0.01  | -0.06 | -0.01 |
| 19   | 8  | 0.11  | -0.19 | -0.04 | -0.04 | 0.09  | 0.00  | 0.05  | -0.09 | -0.01 |
| 20   | 1  | 0.28  | -0.06 | -0.08 | -0.05 | 0.08  | -0.03 | 0.10  | -0.06 | -0.02 |
| 21   | 8  | 0.01  | -0.01 | 0.01  | -0.01 | 0.00  | 0.00  | 0.00  | -0.02 | 0.00  |
| 22   | 1  | -0.17 | -0.11 | -0.04 | 0.58  | 0.20  | -0.18 | 0.60  | 0.18  | -0.21 |
| 23   | 7  | 0.00  | -0.03 | 0.01  | -0.02 | 0.00  | 0.00  | 0.01  | 0.00  | 0.00  |
| 24   | 1  | 0.00  | 0.02  | 0.00  | -0.03 | 0.00  | -0.01 | 0.01  | 0.00  | 0.00  |
| 25   | 7  | 0.00  | -0.02 | 0.01  | -0.01 | 0.00  | 0.00  | 0.01  | 0.00  | 0.00  |
| 26   | 1  | -0.04 | 0.17  | -0.05 | 0.16  | -0.01 | 0.05  | -0.02 | 0.01  | 0.02  |
| 27   | 6  | 0.00  | -0.01 | 0.01  | -0.02 | 0.00  | -0.01 | 0.01  | 0.00  | 0.00  |
| 28   | 1  | 0.00  | -0.01 | 0.01  | -0.02 | 0.00  | -0.01 | 0.01  | 0.00  | 0.00  |
| 29   | 6  | 0.00  | 0.01  | 0.00  | -0.02 | 0.00  | -0.01 | 0.01  | 0.00  | 0.00  |
| 30   | 1  | 0.00  | 0.03  | 0.00  | -0.02 | 0.00  | 0.00  | 0.01  | 0.00  | 0.00  |
| 31   | 6  | 0.00  | 0.00  | 0.00  | -0.03 | 0.00  | -0.01 | 0.01  | 0.00  | 0.00  |
| 32   | 1  | 0.00  | 0.02  | 0.00  | -0.03 | 0.00  | -0.01 | 0.01  | 0.00  | 0.00  |
| 33   | 1  | 0.24  | -0.08 | 0.00  | -0.61 | 0.01  | 0.21  | -0.63 | -0.02 | 0.25  |

22  
A

23  
A

24  
A

|             |    |          |  |          |  |          |
|-------------|----|----------|--|----------|--|----------|
| Frequencies | -- | 377.5132 |  | 380.2575 |  | 406.5875 |
| Red. masses | -- | 5.4231   |  | 4.5273   |  | 7.4407   |
| Frc consts  | -- | 0.4554   |  | 0.3857   |  | 0.7247   |
| IR Inten    | -- | 13.6809  |  | 37.6769  |  | 14.6823  |
| Raman Activ | -- | 3.6100   |  | 0.2077   |  | 2.8652   |
| Depolar (P) | -- | 0.1736   |  | 0.7495   |  | 0.7497   |
| Depolar (U) | -- | 0.2958   |  | 0.8568   |  | 0.8569   |

| Atom | AN | X     | Y     | Z     | X     | Y     | Z     | X     | Y     | Z     |
|------|----|-------|-------|-------|-------|-------|-------|-------|-------|-------|
| 1    | 6  | -0.03 | 0.00  | 0.08  | -0.02 | 0.02  | -0.14 | -0.07 | 0.04  | -0.04 |
| 2    | 6  | 0.04  | 0.00  | -0.03 | 0.00  | 0.02  | 0.09  | 0.00  | 0.08  | -0.02 |
| 3    | 6  | -0.04 | -0.02 | -0.11 | -0.04 | -0.05 | -0.10 | -0.05 | 0.28  | -0.05 |
| 4    | 6  | -0.09 | 0.07  | 0.09  | 0.01  | 0.04  | -0.06 | -0.10 | -0.08 | 0.00  |
| 5    | 6  | -0.05 | -0.01 | -0.06 | 0.00  | 0.01  | -0.16 | 0.07  | 0.05  | -0.11 |
| 6    | 6  | 0.14  | -0.01 | -0.02 | 0.02  | 0.02  | 0.14  | 0.00  | 0.09  | 0.04  |
| 7    | 6  | -0.07 | -0.02 | -0.02 | -0.02 | -0.09 | 0.17  | -0.01 | 0.28  | 0.09  |
| 8    | 1  | -0.04 | 0.00  | -0.23 | -0.08 | -0.07 | -0.16 | 0.05  | 0.34  | -0.08 |
| 9    | 8  | -0.11 | -0.05 | 0.01  | 0.05  | 0.06  | 0.03  | -0.09 | -0.22 | -0.02 |
| 10   | 8  | 0.05  | 0.24  | 0.04  | 0.04  | 0.02  | 0.00  | -0.12 | -0.10 | 0.02  |
| 11   | 6  | -0.05 | -0.02 | 0.12  | 0.01  | -0.05 | -0.07 | 0.04  | 0.27  | 0.03  |
| 12   | 6  | -0.10 | -0.06 | -0.06 | -0.05 | 0.00  | -0.09 | 0.10  | -0.09 | -0.06 |



|                |   |          |       |       |       |          |       |       |          |       |
|----------------|---|----------|-------|-------|-------|----------|-------|-------|----------|-------|
| 30             | 1 | -0.01    | 0.00  | 0.00  | 0.00  | 0.00     | 0.00  | 0.00  | -0.01    | 0.00  |
| 31             | 6 | -0.01    | 0.00  | 0.00  | 0.00  | 0.00     | 0.00  | 0.01  | 0.00     | 0.00  |
| 32             | 1 | -0.02    | 0.00  | 0.00  | 0.00  | -0.01    | 0.00  | 0.01  | -0.01    | 0.00  |
| 33             | 1 | 0.15     | 0.04  | -0.10 | 0.57  | 0.13     | -0.36 | -0.09 | -0.02    | 0.06  |
|                |   | 28       |       |       | 29    |          |       | 30    |          |       |
|                |   | A        |       |       | A     |          |       | A     |          |       |
| Frequencies -- |   | 553.9933 |       |       |       | 585.0921 |       |       | 599.3549 |       |
| Red. masses -- |   | 3.6821   |       |       |       | 1.4401   |       |       | 2.7931   |       |
| Frc consts --  |   | 0.6658   |       |       |       | 0.2905   |       |       | 0.5912   |       |
| IR Inten --    |   | 40.3853  |       |       |       | 116.5593 |       |       | 25.1692  |       |
| Raman Activ -- |   | 6.3673   |       |       |       | 0.6860   |       |       | 0.4074   |       |
| Depolar (P) -- |   | 0.2228   |       |       |       | 0.6648   |       |       | 0.7216   |       |
| Depolar (U) -- |   | 0.3645   |       |       |       | 0.7986   |       |       | 0.8383   |       |
| Atom AN        |   | X        | Y     | Z     | X     | Y        | Z     | X     | Y        | Z     |
| 1              | 6 | 0.09     | -0.02 | -0.12 | 0.03  | -0.02    | -0.04 | -0.02 | 0.02     | 0.09  |
| 2              | 6 | 0.07     | -0.05 | 0.00  | 0.01  | -0.04    | -0.02 | 0.00  | 0.02     | 0.21  |
| 3              | 6 | 0.17     | 0.00  | -0.06 | 0.05  | -0.01    | 0.06  | -0.03 | 0.02     | -0.10 |
| 4              | 6 | -0.12    | 0.02  | 0.01  | -0.05 | 0.01     | -0.04 | 0.00  | 0.02     | -0.04 |
| 5              | 6 | 0.04     | -0.03 | 0.06  | -0.01 | -0.03    | 0.01  | 0.02  | 0.02     | 0.10  |
| 6              | 6 | -0.01    | -0.05 | 0.01  | 0.00  | -0.04    | 0.02  | 0.00  | -0.01    | -0.08 |
| 7              | 6 | 0.16     | 0.02  | 0.09  | 0.02  | 0.03     | -0.06 | 0.01  | -0.02    | 0.15  |
| 8              | 1 | 0.19     | 0.02  | -0.03 | 0.07  | 0.00     | 0.15  | -0.06 | 0.03     | -0.43 |
| 9              | 8 | -0.11    | -0.14 | 0.02  | -0.03 | -0.01    | 0.01  | 0.02  | 0.00     | -0.01 |
| 10             | 8 | -0.05    | 0.12  | 0.04  | -0.02 | 0.04     | -0.03 | -0.02 | -0.02    | -0.01 |
| 11             | 6 | 0.07     | 0.02  | -0.09 | -0.02 | -0.01    | 0.05  | 0.04  | 0.02     | -0.11 |
| 12             | 6 | -0.05    | -0.03 | 0.08  | 0.02  | 0.00     | -0.04 | -0.01 | 0.01     | -0.04 |
| 13             | 8 | -0.07    | 0.02  | 0.02  | 0.01  | 0.01     | 0.01  | -0.11 | -0.01    | -0.03 |
| 14             | 8 | -0.06    | 0.01  | -0.04 | -0.03 | 0.01     | 0.00  | 0.10  | -0.01    | -0.05 |
| 15             | 1 | 0.16     | 0.06  | 0.24  | 0.02  | 0.08     | -0.13 | 0.01  | -0.07    | 0.11  |
| 16             | 1 | 0.18     | 0.00  | 0.21  | 0.35  | -0.13    | 0.55  | 0.11  | -0.07    | 0.36  |
| 17             | 1 | 0.03     | 0.05  | -0.19 | -0.05 | 0.00     | 0.10  | 0.07  | 0.04     | -0.44 |
| 18             | 8 | -0.03    | 0.09  | 0.00  | 0.02  | 0.01     | 0.00  | -0.03 | 0.01     | 0.00  |
| 19             | 8 | -0.05    | -0.03 | 0.01  | 0.00  | 0.03     | -0.04 | 0.01  | -0.02    | -0.03 |
| 20             | 1 | 0.11     | 0.07  | -0.67 | -0.23 | -0.12    | 0.62  | -0.08 | -0.07    | 0.51  |
| 21             | 8 | -0.01    | 0.00  | 0.01  | 0.00  | 0.00     | 0.00  | 0.01  | 0.00     | 0.00  |
| 22             | 1 | 0.16     | 0.03  | -0.09 | 0.02  | 0.00     | -0.02 | -0.09 | -0.02    | 0.05  |
| 23             | 7 | 0.00     | 0.00  | 0.00  | 0.00  | 0.00     | 0.00  | 0.00  | 0.00     | 0.00  |
| 24             | 1 | 0.01     | 0.01  | 0.01  | 0.00  | 0.01     | 0.00  | -0.01 | -0.01    | 0.00  |
| 25             | 7 | 0.00     | 0.00  | 0.00  | 0.00  | 0.00     | 0.00  | 0.01  | 0.00     | 0.00  |
| 26             | 1 | -0.07    | 0.02  | -0.07 | -0.03 | 0.02     | -0.02 | 0.11  | 0.01     | 0.03  |
| 27             | 6 | 0.00     | 0.00  | 0.00  | 0.00  | 0.00     | 0.00  | 0.00  | 0.00     | 0.00  |
| 28             | 1 | 0.00     | 0.00  | 0.00  | 0.00  | 0.00     | 0.00  | 0.00  | 0.00     | -0.01 |
| 29             | 6 | 0.00     | 0.00  | 0.00  | 0.00  | 0.00     | 0.00  | 0.00  | 0.00     | 0.00  |
| 30             | 1 | 0.00     | 0.00  | 0.00  | 0.00  | 0.00     | 0.00  | 0.00  | 0.00     | 0.00  |
| 31             | 6 | 0.01     | 0.00  | 0.00  | 0.00  | 0.00     | 0.00  | 0.00  | 0.00     | 0.00  |
| 32             | 1 | 0.01     | 0.00  | 0.00  | 0.00  | 0.00     | 0.00  | 0.01  | 0.00     | 0.00  |
| 33             | 1 | 0.15     | 0.03  | -0.08 | 0.01  | 0.00     | -0.01 | -0.05 | -0.01    | 0.03  |
|                |   | 31       |       |       | 32    |          |       | 33    |          |       |
|                |   | A        |       |       | A     |          |       | A     |          |       |
| Frequencies -- |   | 617.3343 |       |       |       | 627.6689 |       |       | 655.1367 |       |
| Red. masses -- |   | 1.4303   |       |       |       | 3.4666   |       |       | 4.6503   |       |
| Frc consts --  |   | 0.3212   |       |       |       | 0.8047   |       |       | 1.1760   |       |
| IR Inten --    |   | 15.5382  |       |       |       | 12.1212  |       |       | 129.4001 |       |
| Raman Activ -- |   | 3.7552   |       |       |       | 0.1964   |       |       | 0.2982   |       |
| Depolar (P) -- |   | 0.7326   |       |       |       | 0.7498   |       |       | 0.7215   |       |
| Depolar (U) -- |   | 0.8457   |       |       |       | 0.8570   |       |       | 0.8382   |       |
| Atom AN        |   | X        | Y     | Z     | X     | Y        | Z     | X     | Y        | Z     |
| 1              | 6 | -0.01    | -0.01 | 0.11  | 0.00  | 0.00     | 0.00  | -0.10 | -0.12    | 0.00  |
| 2              | 6 | -0.01    | 0.00  | 0.01  | 0.00  | 0.00     | 0.00  | 0.01  | -0.07    | 0.02  |
| 3              | 6 | -0.02    | 0.00  | -0.01 | 0.00  | 0.00     | 0.00  | -0.14 | 0.10     | 0.01  |

|    |   |       |       |       |       |       |       |       |       |       |
|----|---|-------|-------|-------|-------|-------|-------|-------|-------|-------|
| 4  | 6 | 0.01  | 0.00  | -0.02 | 0.00  | 0.00  | 0.00  | -0.06 | -0.15 | 0.00  |
| 5  | 6 | 0.00  | 0.01  | -0.10 | 0.00  | 0.00  | 0.00  | 0.11  | -0.10 | 0.00  |
| 6  | 6 | 0.00  | 0.00  | 0.00  | 0.00  | 0.00  | 0.00  | 0.00  | 0.03  | -0.01 |
| 7  | 6 | -0.02 | 0.00  | -0.01 | 0.00  | 0.00  | 0.00  | -0.01 | 0.05  | 0.01  |
| 8  | 1 | -0.02 | 0.01  | -0.12 | 0.01  | 0.00  | 0.00  | -0.07 | 0.14  | -0.01 |
| 9  | 8 | 0.01  | 0.03  | -0.02 | 0.00  | 0.00  | 0.00  | -0.09 | 0.16  | 0.08  |
| 10 | 8 | -0.02 | -0.01 | -0.06 | 0.00  | 0.00  | 0.00  | 0.14  | -0.02 | -0.07 |
| 11 | 6 | -0.01 | 0.00  | 0.03  | 0.00  | 0.00  | 0.00  | 0.13  | 0.12  | 0.01  |
| 12 | 6 | 0.01  | 0.01  | -0.01 | 0.00  | 0.00  | 0.00  | 0.07  | -0.13 | -0.01 |
| 13 | 8 | 0.00  | 0.00  | -0.01 | 0.00  | 0.00  | 0.00  | -0.01 | -0.02 | 0.00  |
| 14 | 8 | 0.01  | 0.00  | 0.00  | 0.00  | 0.00  | 0.00  | 0.00  | -0.02 | -0.01 |
| 15 | 1 | -0.02 | 0.00  | -0.04 | 0.00  | 0.01  | 0.01  | 0.00  | -0.16 | -0.03 |
| 16 | 1 | 0.33  | -0.17 | 0.66  | -0.01 | 0.00  | -0.01 | 0.41  | -0.20 | -0.34 |
| 17 | 1 | -0.02 | -0.01 | 0.10  | -0.01 | 0.00  | 0.00  | 0.07  | 0.15  | -0.01 |
| 18 | 8 | 0.01  | -0.02 | 0.02  | 0.00  | 0.00  | 0.00  | 0.08  | 0.17  | 0.05  |
| 19 | 8 | -0.01 | 0.01  | 0.05  | 0.00  | 0.00  | 0.00  | -0.14 | -0.04 | -0.04 |
| 20 | 1 | 0.16  | 0.11  | -0.57 | -0.01 | 0.00  | 0.02  | -0.43 | -0.27 | -0.22 |
| 21 | 8 | 0.00  | 0.00  | 0.00  | 0.00  | 0.00  | 0.00  | 0.00  | 0.00  | 0.00  |
| 22 | 1 | -0.02 | -0.01 | 0.00  | -0.01 | 0.00  | 0.00  | 0.00  | 0.00  | 0.00  |
| 23 | 7 | 0.00  | 0.00  | 0.00  | 0.00  | 0.24  | -0.04 | 0.00  | 0.00  | 0.00  |
| 24 | 1 | 0.00  | -0.01 | 0.00  | 0.00  | -0.11 | 0.02  | 0.00  | 0.01  | 0.00  |
| 25 | 7 | 0.00  | 0.00  | 0.00  | 0.00  | -0.07 | 0.01  | 0.00  | 0.00  | 0.00  |
| 26 | 1 | 0.01  | 0.01  | 0.01  | 0.00  | -0.03 | 0.00  | 0.00  | -0.01 | 0.00  |
| 27 | 6 | 0.00  | 0.00  | 0.00  | 0.00  | -0.12 | 0.02  | 0.00  | 0.00  | 0.00  |
| 28 | 1 | 0.00  | 0.00  | 0.00  | 0.00  | -0.35 | 0.05  | 0.00  | 0.01  | 0.00  |
| 29 | 6 | 0.00  | 0.00  | 0.00  | 0.00  | 0.24  | -0.04 | 0.00  | 0.00  | 0.00  |
| 30 | 1 | 0.00  | 0.00  | 0.00  | 0.00  | 0.37  | -0.06 | 0.00  | 0.00  | 0.00  |
| 31 | 6 | 0.00  | 0.00  | 0.00  | 0.00  | -0.27 | 0.04  | 0.00  | 0.00  | 0.00  |
| 32 | 1 | 0.00  | -0.01 | 0.00  | 0.00  | -0.71 | 0.11  | 0.00  | 0.00  | 0.00  |
| 33 | 1 | 0.00  | -0.01 | 0.01  | -0.01 | 0.00  | 0.01  | 0.04  | 0.01  | -0.03 |

34

35

36

A

A

A

|                |          |          |          |
|----------------|----------|----------|----------|
| Frequencies -- | 671.9190 | 673.1302 | 735.1766 |
| Red. masses -- | 5.1876   | 4.7117   | 6.1087   |
| Frc consts --  | 1.3799   | 1.2579   | 1.9453   |
| IR Inten --    | 0.6950   | 10.5498  | 34.7723  |
| Raman Activ -- | 0.7358   | 5.0386   | 0.0776   |
| Depolar (P) -- | 0.5418   | 0.1263   | 0.7089   |
| Depolar (U) -- | 0.7028   | 0.2242   | 0.8297   |

| Atom | AN | X     | Y     | Z     | X     | Y     | Z     | X     | Y     | Z     |
|------|----|-------|-------|-------|-------|-------|-------|-------|-------|-------|
| 1    | 6  | 0.02  | -0.03 | 0.00  | 0.04  | -0.13 | -0.02 | 0.04  | -0.02 | 0.12  |
| 2    | 6  | 0.03  | 0.00  | 0.00  | 0.16  | 0.01  | 0.00  | -0.01 | 0.06  | -0.27 |
| 3    | 6  | 0.02  | -0.03 | -0.01 | 0.03  | -0.12 | -0.02 | 0.06  | -0.03 | -0.12 |
| 4    | 6  | -0.01 | -0.03 | 0.01  | -0.07 | -0.12 | 0.01  | 0.10  | -0.07 | 0.22  |
| 5    | 6  | 0.00  | 0.02  | 0.01  | 0.03  | 0.14  | 0.02  | -0.05 | -0.02 | 0.09  |
| 6    | 6  | 0.02  | 0.02  | 0.00  | 0.09  | 0.00  | 0.01  | -0.02 | 0.33  | -0.02 |
| 7    | 6  | -0.03 | 0.00  | 0.01  | -0.15 | -0.01 | 0.00  | -0.01 | -0.01 | 0.09  |
| 8    | 1  | 0.05  | -0.01 | -0.01 | 0.18  | -0.02 | 0.01  | 0.06  | -0.03 | -0.12 |
| 9    | 8  | -0.02 | 0.02  | 0.01  | -0.09 | 0.10  | 0.07  | -0.05 | 0.04  | -0.06 |
| 10   | 8  | 0.02  | 0.00  | -0.01 | 0.11  | -0.01 | -0.06 | -0.01 | -0.01 | -0.10 |
| 11   | 6  | -0.01 | 0.02  | 0.00  | 0.02  | 0.12  | 0.01  | -0.07 | -0.05 | -0.12 |
| 12   | 6  | -0.02 | 0.02  | 0.01  | -0.09 | 0.12  | 0.00  | -0.05 | -0.06 | 0.25  |
| 13   | 8  | -0.01 | 0.01  | 0.02  | -0.08 | 0.02  | 0.10  | 0.06  | -0.07 | 0.03  |
| 14   | 8  | -0.02 | 0.00  | -0.02 | -0.08 | -0.02 | -0.11 | -0.05 | -0.05 | 0.06  |
| 15   | 1  | -0.03 | 0.02  | 0.01  | -0.15 | -0.01 | 0.01  | -0.01 | 0.08  | 0.30  |
| 16   | 1  | 0.09  | -0.04 | -0.03 | 0.40  | -0.19 | -0.23 | 0.26  | -0.14 | 0.34  |
| 17   | 1  | 0.02  | 0.00  | -0.01 | 0.18  | 0.04  | -0.01 | -0.07 | -0.05 | -0.08 |
| 18   | 8  | -0.02 | -0.03 | -0.01 | -0.10 | -0.12 | -0.05 | 0.04  | 0.02  | -0.07 |
| 19   | 8  | 0.03  | 0.01  | 0.00  | 0.12  | 0.03  | 0.04  | 0.00  | -0.01 | -0.09 |
| 20   | 1  | 0.07  | 0.05  | 0.05  | 0.43  | 0.26  | 0.16  | -0.16 | -0.11 | 0.33  |

|    |   |       |       |       |       |       |       |       |       |       |
|----|---|-------|-------|-------|-------|-------|-------|-------|-------|-------|
| 21 | 8 | 0.00  | 0.00  | 0.00  | 0.00  | 0.00  | 0.00  | 0.00  | 0.00  | 0.00  |
| 22 | 1 | 0.00  | 0.00  | 0.00  | 0.05  | 0.01  | -0.02 | -0.01 | -0.01 | 0.00  |
| 23 | 7 | 0.00  | 0.25  | -0.04 | 0.00  | -0.05 | 0.01  | 0.00  | -0.01 | 0.00  |
| 24 | 1 | 0.01  | -0.17 | 0.03  | 0.02  | 0.04  | 0.02  | 0.01  | -0.14 | 0.02  |
| 25 | 7 | 0.00  | -0.37 | 0.06  | -0.01 | 0.07  | -0.01 | 0.00  | 0.03  | -0.01 |
| 26 | 1 | -0.01 | -0.18 | -0.03 | -0.08 | -0.02 | -0.24 | -0.05 | -0.20 | 0.04  |
| 27 | 6 | 0.00  | 0.30  | -0.05 | 0.00  | -0.05 | 0.02  | 0.00  | -0.02 | 0.00  |
| 28 | 1 | 0.00  | 0.70  | -0.11 | 0.00  | -0.13 | 0.03  | 0.00  | -0.02 | 0.01  |
| 29 | 6 | 0.00  | -0.18 | 0.03  | 0.01  | 0.03  | 0.00  | 0.00  | 0.00  | 0.00  |
| 30 | 1 | 0.00  | -0.27 | 0.04  | 0.01  | 0.05  | -0.01 | 0.00  | 0.04  | 0.00  |
| 31 | 6 | 0.00  | -0.02 | 0.00  | 0.01  | 0.00  | 0.00  | 0.00  | 0.01  | 0.00  |
| 32 | 1 | 0.00  | 0.00  | 0.00  | 0.01  | 0.00  | 0.00  | 0.00  | 0.02  | 0.00  |
| 33 | 1 | 0.01  | 0.00  | -0.01 | 0.04  | 0.02  | -0.03 | 0.02  | 0.01  | -0.01 |

37

38

39

A

A

A

|                |          |          |          |
|----------------|----------|----------|----------|
| Frequencies -- | 745.7333 | 766.0880 | 768.3737 |
| Red. masses -- | 5.0787   | 2.5731   | 1.4034   |
| Frc consts --  | 1.6641   | 0.8898   | 0.4882   |
| IR Inten --    | 8.8557   | 62.8615  | 34.7169  |
| Raman Activ -- | 17.4790  | 0.7763   | 0.2782   |
| Depolar (P) -- | 0.0287   | 0.4559   | 0.3893   |
| Depolar (U) -- | 0.0557   | 0.6263   | 0.5604   |

| Atom | AN | X     | Y     | Z     | X     | Y     | Z     | X     | Y     | Z     |
|------|----|-------|-------|-------|-------|-------|-------|-------|-------|-------|
| 1    | 6  | -0.04 | 0.01  | -0.03 | 0.04  | -0.01 | -0.02 | -0.02 | 0.00  | 0.00  |
| 2    | 6  | -0.14 | -0.01 | 0.00  | -0.01 | 0.01  | 0.04  | 0.00  | 0.00  | -0.01 |
| 3    | 6  | 0.02  | 0.11  | 0.01  | 0.10  | -0.03 | 0.04  | -0.04 | 0.01  | -0.01 |
| 4    | 6  | -0.05 | -0.13 | 0.06  | -0.08 | 0.00  | -0.10 | 0.03  | 0.00  | 0.04  |
| 5    | 6  | -0.02 | -0.01 | 0.03  | -0.04 | -0.02 | 0.01  | 0.02  | 0.01  | -0.01 |
| 6    | 6  | -0.16 | -0.06 | -0.01 | -0.02 | 0.22  | -0.04 | 0.01  | -0.09 | 0.02  |
| 7    | 6  | 0.26  | 0.01  | 0.00  | 0.02  | 0.02  | 0.03  | -0.01 | -0.01 | -0.01 |
| 8    | 1  | -0.09 | 0.03  | 0.06  | 0.12  | 0.00  | -0.21 | -0.05 | 0.00  | 0.10  |
| 9    | 8  | -0.11 | 0.06  | 0.05  | -0.02 | 0.00  | 0.05  | 0.01  | 0.00  | -0.02 |
| 10   | 8  | 0.08  | -0.05 | -0.07 | 0.04  | -0.01 | 0.02  | -0.01 | 0.01  | -0.01 |
| 11   | 6  | 0.07  | -0.08 | -0.01 | -0.09 | -0.06 | 0.04  | 0.04  | 0.02  | -0.01 |
| 12   | 6  | -0.09 | 0.11  | -0.02 | 0.05  | 0.02  | -0.13 | -0.02 | -0.01 | 0.05  |
| 13   | 8  | 0.06  | -0.01 | -0.17 | 0.00  | -0.05 | 0.00  | 0.00  | 0.02  | 0.00  |
| 14   | 8  | 0.06  | 0.04  | 0.17  | 0.01  | -0.04 | 0.02  | 0.00  | 0.02  | -0.01 |
| 15   | 1  | 0.27  | -0.03 | 0.04  | 0.02  | 0.22  | -0.33 | -0.01 | -0.09 | 0.14  |
| 16   | 1  | 0.35  | -0.21 | -0.21 | 0.03  | -0.02 | -0.18 | -0.02 | 0.01  | 0.07  |
| 17   | 1  | -0.02 | -0.03 | 0.00  | -0.13 | -0.01 | -0.24 | 0.05  | 0.01  | 0.10  |
| 18   | 8  | -0.12 | -0.07 | -0.04 | 0.01  | -0.01 | 0.04  | 0.00  | 0.00  | -0.02 |
| 19   | 8  | 0.10  | 0.07  | 0.04  | -0.02 | 0.00  | 0.04  | 0.01  | 0.00  | -0.01 |
| 20   | 1  | 0.37  | 0.28  | 0.17  | 0.00  | 0.00  | -0.14 | 0.00  | 0.00  | 0.05  |
| 21   | 8  | 0.00  | 0.00  | -0.01 | 0.00  | 0.00  | 0.00  | 0.00  | 0.00  | 0.00  |
| 22   | 1  | -0.07 | -0.01 | 0.03  | -0.03 | -0.01 | 0.02  | 0.01  | 0.00  | -0.01 |
| 23   | 7  | 0.00  | 0.00  | -0.01 | 0.00  | 0.02  | 0.00  | 0.00  | 0.03  | 0.00  |
| 24   | 1  | -0.01 | 0.00  | -0.03 | 0.00  | -0.28 | 0.04  | 0.00  | -0.18 | 0.03  |
| 25   | 7  | 0.01  | 0.00  | 0.00  | 0.00  | 0.04  | -0.01 | 0.00  | 0.02  | 0.00  |
| 26   | 1  | 0.05  | 0.10  | 0.35  | 0.01  | -0.10 | 0.04  | 0.00  | 0.06  | -0.02 |
| 27   | 6  | 0.00  | 0.00  | -0.01 | 0.00  | -0.04 | 0.00  | 0.00  | -0.04 | 0.01  |
| 28   | 1  | 0.00  | 0.01  | -0.01 | 0.00  | 0.15  | -0.02 | 0.00  | 0.24  | -0.04 |
| 29   | 6  | -0.01 | 0.00  | 0.00  | 0.00  | -0.06 | 0.01  | 0.00  | -0.09 | 0.01  |
| 30   | 1  | 0.00  | 0.00  | 0.01  | 0.00  | 0.56  | -0.08 | 0.00  | 0.78  | -0.11 |
| 31   | 6  | -0.01 | 0.00  | 0.00  | 0.00  | -0.03 | 0.00  | 0.00  | -0.06 | 0.01  |
| 32   | 1  | -0.02 | 0.00  | 0.00  | 0.00  | 0.29  | -0.04 | 0.00  | 0.42  | -0.07 |
| 33   | 1  | -0.01 | 0.00  | 0.01  | -0.03 | 0.00  | 0.01  | 0.01  | 0.00  | -0.01 |

40

41

42

A

A

A

|                |          |          |          |
|----------------|----------|----------|----------|
| Frequencies -- | 794.8206 | 809.1634 | 813.7251 |
| Red. masses -- | 1.8306   | 5.8056   | 1.2235   |

|                |         |         |         |
|----------------|---------|---------|---------|
| Frc consts --  | 0.6814  | 2.2396  | 0.4773  |
| IR Inten --    | 42.4888 | 12.4725 | 80.0501 |
| Raman Activ -- | 0.9458  | 0.2163  | 0.1002  |
| Depolar (P) -- | 0.6736  | 0.7432  | 0.6123  |
| Depolar (U) -- | 0.8050  | 0.8527  | 0.7596  |

  

| Atom | AN | X     | Y     | Z     | X     | Y     | Z     | X     | Y     | Z     |
|------|----|-------|-------|-------|-------|-------|-------|-------|-------|-------|
| 1    | 6  | 0.01  | 0.00  | -0.05 | 0.00  | 0.00  | 0.19  | 0.00  | 0.00  | -0.02 |
| 2    | 6  | 0.00  | 0.00  | 0.19  | 0.00  | 0.00  | 0.02  | 0.00  | 0.01  | 0.01  |
| 3    | 6  | 0.02  | -0.01 | -0.03 | 0.03  | 0.01  | 0.02  | 0.01  | 0.00  | -0.01 |
| 4    | 6  | 0.00  | -0.01 | 0.02  | -0.18 | 0.06  | -0.34 | 0.01  | -0.01 | 0.04  |
| 5    | 6  | -0.01 | 0.00  | -0.04 | -0.01 | 0.00  | -0.20 | 0.00  | 0.00  | 0.02  |
| 6    | 6  | -0.01 | 0.11  | -0.04 | 0.01  | 0.02  | 0.00  | 0.00  | 0.03  | -0.01 |
| 7    | 6  | 0.00  | 0.02  | -0.11 | 0.08  | 0.01  | -0.01 | 0.00  | 0.00  | -0.01 |
| 8    | 1  | 0.04  | -0.05 | 0.50  | 0.00  | 0.02  | -0.29 | 0.01  | -0.01 | 0.07  |
| 9    | 8  | -0.01 | 0.00  | 0.00  | 0.03  | 0.00  | 0.11  | -0.01 | 0.00  | -0.01 |
| 10   | 8  | 0.00  | 0.00  | -0.01 | 0.06  | -0.04 | 0.07  | 0.00  | 0.00  | -0.01 |
| 11   | 6  | -0.02 | -0.01 | -0.03 | -0.01 | -0.02 | -0.02 | -0.01 | -0.01 | 0.00  |
| 12   | 6  | 0.00  | 0.00  | 0.01  | -0.10 | -0.05 | 0.35  | 0.01  | 0.01  | -0.04 |
| 13   | 8  | -0.03 | -0.03 | -0.01 | 0.00  | -0.01 | 0.01  | 0.00  | -0.02 | 0.00  |
| 14   | 8  | 0.03  | -0.02 | -0.02 | 0.00  | 0.00  | -0.01 | 0.00  | 0.00  | 0.00  |
| 15   | 1  | 0.00  | -0.01 | 0.64  | 0.08  | 0.05  | 0.04  | -0.01 | 0.01  | 0.05  |
| 16   | 1  | 0.02  | -0.01 | 0.00  | -0.06 | 0.01  | -0.26 | 0.02  | -0.01 | 0.03  |
| 17   | 1  | -0.04 | -0.05 | 0.47  | -0.06 | -0.03 | 0.33  | -0.01 | -0.01 | 0.00  |
| 18   | 8  | 0.01  | 0.00  | 0.00  | 0.02  | 0.00  | -0.10 | 0.00  | 0.00  | 0.01  |
| 19   | 8  | 0.00  | 0.00  | 0.00  | 0.03  | 0.03  | -0.08 | -0.01 | -0.01 | 0.01  |
| 20   | 1  | -0.01 | 0.00  | -0.01 | -0.03 | -0.01 | 0.21  | 0.00  | 0.00  | -0.03 |
| 21   | 8  | 0.00  | 0.00  | 0.00  | 0.00  | 0.00  | 0.00  | 0.00  | 0.00  | 0.00  |
| 22   | 1  | -0.02 | 0.00  | 0.01  | -0.01 | 0.00  | 0.02  | 0.00  | 0.00  | 0.00  |
| 23   | 7  | 0.00  | 0.00  | 0.00  | 0.00  | -0.01 | 0.00  | 0.00  | -0.02 | 0.00  |
| 24   | 1  | -0.01 | -0.15 | 0.02  | 0.00  | 0.46  | -0.07 | 0.00  | 0.91  | -0.14 |
| 25   | 7  | 0.00  | 0.01  | 0.00  | 0.00  | -0.01 | 0.00  | 0.00  | -0.03 | 0.00  |
| 26   | 1  | 0.04  | -0.04 | 0.03  | 0.01  | -0.07 | 0.00  | 0.00  | -0.09 | 0.01  |
| 27   | 6  | 0.00  | -0.01 | 0.00  | 0.00  | 0.02  | 0.00  | 0.00  | 0.04  | -0.01 |
| 28   | 1  | 0.00  | -0.01 | 0.00  | 0.00  | -0.03 | 0.00  | 0.00  | -0.06 | 0.01  |
| 29   | 6  | 0.00  | 0.00  | 0.00  | 0.00  | 0.01  | 0.00  | 0.00  | 0.02  | 0.00  |
| 30   | 1  | 0.00  | -0.04 | 0.01  | 0.00  | 0.07  | -0.01 | 0.00  | 0.12  | -0.02 |
| 31   | 6  | 0.00  | 0.02  | 0.00  | 0.00  | -0.05 | 0.01  | 0.00  | -0.09 | 0.01  |
| 32   | 1  | 0.00  | -0.05 | 0.01  | 0.00  | 0.16  | -0.02 | 0.00  | 0.31  | -0.05 |
| 33   | 1  | -0.01 | 0.00  | 0.00  | -0.05 | 0.00  | 0.02  | 0.00  | 0.00  | 0.00  |

|  |    |    |    |
|--|----|----|----|
|  | 43 | 44 | 45 |
|  | A  | A  | A  |

  

|                |          |          |          |
|----------------|----------|----------|----------|
| Frequencies -- | 833.9881 | 865.2331 | 887.4566 |
| Red. masses -- | 6.1752   | 3.8645   | 1.2025   |
| Frc consts --  | 2.5306   | 1.7046   | 0.5580   |
| IR Inten --    | 12.0325  | 1.2872   | 12.4111  |
| Raman Activ -- | 4.9415   | 0.7337   | 0.2984   |
| Depolar (P) -- | 0.0515   | 0.7401   | 0.7500   |
| Depolar (U) -- | 0.0980   | 0.8507   | 0.8571   |

  

| Atom | AN | X     | Y     | Z     | X     | Y     | Z     | X    | Y     | Z    |
|------|----|-------|-------|-------|-------|-------|-------|------|-------|------|
| 1    | 6  | -0.10 | 0.08  | -0.01 | 0.00  | 0.00  | 0.22  | 0.00 | 0.00  | 0.00 |
| 2    | 6  | -0.06 | 0.00  | 0.00  | 0.00  | 0.03  | -0.20 | 0.00 | -0.01 | 0.00 |
| 3    | 6  | -0.12 | 0.22  | 0.02  | 0.01  | 0.01  | -0.11 | 0.00 | 0.00  | 0.00 |
| 4    | 6  | 0.01  | -0.04 | 0.05  | -0.08 | 0.03  | -0.17 | 0.00 | 0.00  | 0.00 |
| 5    | 6  | -0.09 | -0.09 | 0.00  | -0.01 | 0.00  | 0.22  | 0.00 | 0.00  | 0.00 |
| 6    | 6  | 0.25  | 0.01  | 0.04  | 0.01  | -0.06 | 0.03  | 0.00 | 0.00  | 0.00 |
| 7    | 6  | 0.24  | 0.01  | 0.00  | 0.01  | 0.01  | -0.05 | 0.00 | 0.00  | 0.00 |
| 8    | 1  | -0.34 | 0.08  | 0.00  | 0.01  | -0.03 | 0.29  | 0.00 | 0.00  | 0.00 |
| 9    | 8  | -0.03 | 0.02  | 0.00  | 0.02  | 0.00  | 0.05  | 0.00 | 0.00  | 0.00 |
| 10   | 8  | 0.01  | -0.03 | -0.03 | 0.03  | -0.03 | 0.02  | 0.00 | 0.00  | 0.00 |
| 11   | 6  | -0.09 | -0.22 | -0.02 | -0.01 | 0.00  | -0.10 | 0.00 | 0.00  | 0.00 |



|    |   |       |       |       |       |       |       |       |       |       |
|----|---|-------|-------|-------|-------|-------|-------|-------|-------|-------|
| 12 | 6 | -0.01 | 0.03  | -0.03 | 0.05  | 0.03  | -0.19 | 0.00  | 0.00  | 0.00  |
| 13 | 8 | 0.00  | 0.05  | 0.24  | 0.02  | 0.02  | 0.01  | 0.00  | 0.01  | 0.00  |
| 14 | 8 | 0.01  | -0.04 | -0.26 | -0.03 | 0.01  | 0.01  | 0.00  | 0.00  | 0.00  |
| 15 | 1 | 0.24  | 0.01  | -0.01 | 0.00  | -0.04 | 0.76  | 0.00  | -0.01 | 0.01  |
| 16 | 1 | 0.07  | -0.06 | -0.03 | -0.01 | -0.01 | -0.06 | -0.01 | 0.00  | 0.00  |
| 17 | 1 | -0.31 | -0.12 | -0.01 | -0.02 | -0.03 | 0.27  | 0.00  | 0.00  | 0.00  |
| 18 | 8 | -0.03 | -0.02 | 0.00  | -0.01 | 0.00  | 0.05  | 0.00  | 0.00  | 0.00  |
| 19 | 8 | 0.02  | 0.04  | 0.02  | -0.02 | -0.03 | 0.03  | 0.00  | 0.00  | 0.00  |
| 20 | 1 | 0.06  | 0.07  | 0.03  | 0.00  | -0.01 | -0.06 | 0.00  | 0.00  | 0.00  |
| 21 | 8 | 0.00  | 0.00  | 0.00  | 0.00  | 0.00  | 0.00  | 0.00  | 0.00  | 0.00  |
| 22 | 1 | 0.05  | 0.01  | -0.03 | 0.00  | 0.00  | 0.00  | 0.00  | 0.00  | 0.00  |
| 23 | 7 | 0.00  | 0.00  | 0.01  | 0.00  | 0.00  | 0.00  | 0.00  | 0.02  | 0.00  |
| 24 | 1 | 0.02  | -0.05 | 0.05  | 0.01  | -0.02 | 0.01  | 0.01  | -0.38 | 0.06  |
| 25 | 7 | -0.01 | 0.00  | 0.00  | 0.00  | 0.00  | 0.00  | 0.00  | 0.01  | 0.00  |
| 26 | 1 | 0.03  | -0.10 | -0.50 | -0.03 | 0.03  | -0.03 | 0.00  | 0.00  | 0.00  |
| 27 | 6 | -0.01 | 0.00  | 0.01  | 0.00  | 0.00  | 0.00  | 0.00  | 0.06  | -0.01 |
| 28 | 1 | -0.01 | 0.01  | 0.01  | 0.00  | 0.02  | 0.00  | 0.01  | -0.46 | 0.07  |
| 29 | 6 | 0.01  | 0.00  | 0.00  | 0.00  | 0.00  | 0.00  | 0.00  | 0.05  | -0.01 |
| 30 | 1 | 0.00  | 0.00  | -0.02 | 0.00  | 0.01  | -0.01 | 0.00  | -0.34 | 0.04  |
| 31 | 6 | 0.01  | 0.01  | 0.00  | 0.00  | 0.01  | 0.00  | 0.00  | -0.10 | 0.02  |
| 32 | 1 | 0.01  | -0.02 | 0.00  | 0.00  | -0.03 | 0.01  | -0.01 | 0.70  | -0.10 |
| 33 | 1 | 0.03  | 0.00  | -0.02 | -0.01 | 0.00  | 0.01  | 0.00  | 0.00  | 0.00  |

46

47

48

A

A

A

|                |          |          |          |
|----------------|----------|----------|----------|
| Frequencies -- | 905.9519 | 921.9482 | 941.8188 |
| Red. masses -- | 6.3828   | 1.3426   | 6.3162   |
| Frc consts --  | 3.0865   | 0.6724   | 3.3010   |
| IR Inten --    | 6.2833   | 9.2884   | 3.9464   |
| Raman Activ -- | 3.9095   | 0.0956   | 5.2660   |
| Depolar (P) -- | 0.7499   | 0.7430   | 0.7423   |
| Depolar (U) -- | 0.8571   | 0.8525   | 0.8521   |

| Atom | AN | X     | Y     | Z     | X    | Y     | Z     | X     | Y    | Z     |
|------|----|-------|-------|-------|------|-------|-------|-------|------|-------|
| 1    | 6  | 0.05  | 0.25  | -0.02 | 0.00 | 0.00  | 0.00  | 0.00  | 0.00 | 0.00  |
| 2    | 6  | -0.01 | 0.30  | 0.06  | 0.00 | 0.00  | 0.00  | 0.00  | 0.00 | 0.00  |
| 3    | 6  | 0.12  | -0.08 | 0.01  | 0.00 | 0.00  | 0.00  | 0.00  | 0.00 | 0.00  |
| 4    | 6  | -0.05 | -0.06 | 0.08  | 0.00 | 0.00  | 0.00  | 0.00  | 0.00 | 0.00  |
| 5    | 6  | -0.07 | 0.25  | -0.01 | 0.00 | 0.00  | 0.00  | 0.00  | 0.00 | 0.00  |
| 6    | 6  | 0.01  | -0.21 | 0.03  | 0.00 | 0.00  | 0.00  | 0.00  | 0.00 | -0.01 |
| 7    | 6  | 0.00  | -0.02 | -0.01 | 0.00 | 0.00  | 0.00  | 0.00  | 0.00 | 0.00  |
| 8    | 1  | -0.03 | -0.17 | -0.04 | 0.00 | 0.00  | 0.00  | 0.00  | 0.00 | 0.00  |
| 9    | 8  | -0.12 | 0.00  | 0.04  | 0.00 | 0.00  | 0.00  | 0.00  | 0.00 | 0.00  |
| 10   | 8  | 0.09  | -0.14 | -0.09 | 0.00 | 0.00  | 0.00  | 0.00  | 0.00 | 0.00  |
| 11   | 6  | -0.12 | -0.09 | 0.01  | 0.00 | 0.00  | 0.00  | 0.00  | 0.00 | 0.00  |
| 12   | 6  | 0.08  | -0.04 | 0.05  | 0.00 | 0.00  | 0.00  | 0.00  | 0.00 | 0.00  |
| 13   | 8  | -0.02 | 0.04  | -0.02 | 0.00 | 0.00  | 0.00  | 0.00  | 0.00 | -0.01 |
| 14   | 8  | 0.01  | 0.03  | -0.02 | 0.00 | 0.00  | 0.00  | 0.01  | 0.00 | 0.02  |
| 15   | 1  | -0.02 | 0.36  | -0.01 | 0.00 | 0.00  | 0.00  | 0.00  | 0.00 | 0.00  |
| 16   | 1  | 0.27  | -0.25 | -0.19 | 0.00 | 0.00  | 0.00  | 0.00  | 0.00 | 0.00  |
| 17   | 1  | 0.04  | -0.16 | -0.03 | 0.00 | 0.00  | 0.00  | 0.00  | 0.00 | 0.00  |
| 18   | 8  | 0.12  | 0.02  | 0.03  | 0.00 | 0.00  | 0.00  | 0.00  | 0.00 | 0.00  |
| 19   | 8  | -0.09 | -0.16 | -0.06 | 0.00 | 0.00  | 0.00  | 0.00  | 0.00 | 0.00  |
| 20   | 1  | -0.26 | -0.29 | -0.11 | 0.00 | 0.00  | 0.00  | 0.00  | 0.00 | 0.00  |
| 21   | 8  | 0.00  | 0.00  | 0.00  | 0.00 | 0.00  | 0.00  | 0.00  | 0.00 | 0.00  |
| 22   | 1  | 0.01  | 0.01  | 0.00  | 0.00 | 0.00  | 0.00  | 0.00  | 0.00 | 0.00  |
| 23   | 7  | 0.00  | 0.00  | 0.00  | 0.00 | -0.01 | 0.00  | -0.18 | 0.00 | 0.00  |
| 24   | 1  | -0.01 | -0.06 | 0.01  | 0.00 | 0.00  | 0.00  | -0.03 | 0.04 | 0.23  |
| 25   | 7  | 0.00  | 0.00  | 0.00  | 0.00 | -0.01 | 0.00  | -0.15 | 0.01 | 0.05  |
| 26   | 1  | 0.01  | 0.10  | -0.01 | 0.00 | -0.06 | 0.01  | 0.01  | 0.00 | -0.01 |
| 27   | 6  | 0.00  | 0.00  | 0.00  | 0.00 | 0.13  | -0.02 | 0.02  | 0.05 | 0.32  |
| 28   | 1  | 0.00  | -0.01 | 0.00  | 0.00 | -0.82 | 0.12  | -0.12 | 0.04 | 0.31  |

|    |   |      |       |       |      |       |       |       |       |       |
|----|---|------|-------|-------|------|-------|-------|-------|-------|-------|
| 29 | 6 | 0.00 | 0.01  | 0.00  | 0.00 | -0.10 | 0.01  | 0.42  | -0.01 | -0.04 |
| 30 | 1 | 0.00 | -0.04 | 0.01  | 0.00 | 0.42  | -0.06 | 0.43  | 0.00  | 0.00  |
| 31 | 6 | 0.00 | -0.01 | 0.00  | 0.00 | 0.05  | -0.01 | -0.07 | -0.05 | -0.35 |
| 32 | 1 | 0.01 | 0.06  | -0.01 | 0.01 | -0.31 | 0.05  | -0.28 | -0.05 | -0.30 |
| 33 | 1 | 0.02 | 0.01  | -0.01 | 0.00 | 0.00  | 0.00  | 0.00  | 0.00  | 0.00  |

49

50

51

A

A

A

|                |          |          |           |
|----------------|----------|----------|-----------|
| Frequencies -- | 960.2324 | 983.1945 | 1023.8086 |
| Red. masses -- | 3.1185   | 1.3973   | 1.3531    |
| Frc consts --  | 1.6941   | 0.7958   | 0.8357    |
| IR Inten --    | 38.0605  | 0.1171   | 1.7155    |
| Raman Activ -- | 2.3770   | 0.0449   | 0.0413    |
| Depolar (P) -- | 0.3528   | 0.2882   | 0.2550    |
| Depolar (U) -- | 0.5216   | 0.4474   | 0.4063    |

| Atom | AN | X     | Y     | Z     | X     | Y     | Z     | X     | Y     | Z     |
|------|----|-------|-------|-------|-------|-------|-------|-------|-------|-------|
| 1    | 6  | 0.00  | 0.00  | 0.00  | 0.00  | 0.00  | 0.04  | 0.00  | 0.00  | -0.01 |
| 2    | 6  | 0.00  | 0.00  | -0.01 | 0.00  | 0.00  | 0.00  | 0.00  | 0.00  | -0.02 |
| 3    | 6  | 0.00  | 0.00  | 0.00  | 0.00  | 0.02  | -0.13 | 0.00  | -0.01 | 0.08  |
| 4    | 6  | 0.00  | 0.00  | 0.00  | -0.01 | 0.01  | -0.02 | 0.00  | 0.00  | 0.01  |
| 5    | 6  | 0.00  | 0.00  | 0.00  | 0.00  | 0.00  | -0.04 | 0.00  | 0.00  | -0.01 |
| 6    | 6  | 0.00  | 0.00  | 0.00  | 0.00  | 0.00  | 0.00  | 0.00  | 0.00  | 0.00  |
| 7    | 6  | 0.00  | 0.00  | 0.00  | 0.00  | 0.00  | 0.01  | 0.00  | 0.01  | -0.12 |
| 8    | 1  | 0.00  | 0.00  | 0.01  | 0.02  | -0.05 | 0.73  | -0.02 | 0.03  | -0.45 |
| 9    | 8  | 0.00  | 0.00  | 0.00  | 0.00  | 0.00  | 0.01  | 0.00  | 0.00  | 0.00  |
| 10   | 8  | 0.00  | 0.00  | 0.00  | 0.01  | -0.01 | 0.00  | 0.00  | 0.00  | 0.00  |
| 11   | 6  | 0.00  | 0.00  | 0.00  | 0.00  | -0.02 | 0.11  | 0.00  | -0.01 | 0.10  |
| 12   | 6  | 0.00  | 0.00  | 0.00  | -0.01 | -0.01 | 0.03  | 0.00  | 0.00  | 0.01  |
| 13   | 8  | 0.01  | 0.00  | 0.01  | 0.00  | 0.00  | 0.00  | 0.00  | 0.00  | 0.00  |
| 14   | 8  | -0.02 | 0.00  | -0.01 | 0.00  | 0.00  | 0.00  | 0.00  | 0.00  | 0.00  |
| 15   | 1  | 0.00  | 0.00  | 0.00  | 0.00  | 0.00  | -0.07 | 0.00  | -0.06 | 0.66  |
| 16   | 1  | 0.00  | 0.00  | 0.00  | -0.01 | 0.00  | 0.01  | 0.01  | 0.00  | 0.00  |
| 17   | 1  | 0.00  | 0.00  | 0.00  | 0.01  | 0.05  | -0.65 | 0.01  | 0.05  | -0.57 |
| 18   | 8  | 0.00  | 0.00  | 0.00  | 0.00  | 0.00  | -0.01 | 0.00  | 0.00  | 0.00  |
| 19   | 8  | 0.00  | 0.00  | 0.00  | 0.00  | 0.00  | 0.00  | 0.00  | 0.00  | 0.00  |
| 20   | 1  | 0.00  | 0.00  | 0.00  | -0.01 | 0.00  | 0.00  | -0.01 | 0.00  | 0.00  |
| 21   | 8  | 0.00  | 0.00  | 0.00  | 0.00  | 0.00  | 0.00  | 0.00  | 0.00  | 0.00  |
| 22   | 1  | 0.00  | 0.00  | 0.00  | 0.00  | 0.00  | 0.00  | 0.00  | 0.00  | 0.00  |
| 23   | 7  | -0.16 | 0.03  | 0.16  | 0.00  | 0.00  | 0.00  | 0.00  | 0.00  | 0.00  |
| 24   | 1  | -0.33 | -0.03 | -0.04 | 0.00  | 0.00  | 0.00  | 0.00  | 0.00  | 0.00  |
| 25   | 7  | 0.20  | 0.02  | 0.13  | 0.00  | 0.00  | 0.00  | 0.00  | 0.00  | 0.00  |
| 26   | 1  | 0.00  | 0.00  | -0.03 | 0.00  | -0.01 | 0.00  | 0.00  | 0.01  | 0.00  |
| 27   | 6  | 0.11  | -0.02 | -0.14 | 0.00  | 0.00  | 0.00  | 0.00  | 0.00  | 0.00  |
| 28   | 1  | -0.27 | -0.03 | -0.20 | 0.00  | 0.00  | 0.00  | 0.00  | 0.00  | 0.00  |
| 29   | 6  | -0.02 | -0.01 | -0.07 | 0.00  | 0.00  | 0.00  | 0.00  | 0.00  | 0.00  |
| 30   | 1  | 0.05  | 0.06  | 0.56  | 0.00  | 0.00  | 0.00  | 0.00  | 0.00  | 0.00  |
| 31   | 6  | -0.11 | -0.02 | -0.12 | 0.00  | 0.00  | 0.00  | 0.00  | 0.00  | 0.00  |
| 32   | 1  | 0.44  | -0.02 | -0.29 | 0.00  | 0.00  | 0.00  | 0.00  | 0.00  | 0.00  |
| 33   | 1  | 0.00  | 0.00  | 0.00  | 0.00  | 0.00  | 0.00  | 0.00  | 0.00  | 0.00  |

52

53

54

A

A

A

|                |           |           |           |
|----------------|-----------|-----------|-----------|
| Frequencies -- | 1033.0952 | 1071.6360 | 1078.9726 |
| Red. masses -- | 1.0870    | 1.3832    | 1.5098    |
| Frc consts --  | 0.6835    | 0.9359    | 1.0356    |
| IR Inten --    | 96.4999   | 11.4722   | 94.6032   |
| Raman Activ -- | 0.2378    | 2.7042    | 1.3611    |
| Depolar (P) -- | 0.6946    | 0.6495    | 0.7336    |
| Depolar (U) -- | 0.8198    | 0.7875    | 0.8463    |

| Atom | AN | X    | Y    | Z    | X    | Y    | Z    | X    | Y    | Z    |
|------|----|------|------|------|------|------|------|------|------|------|
| 1    | 6  | 0.00 | 0.00 | 0.00 | 0.00 | 0.00 | 0.00 | 0.00 | 0.00 | 0.00 |
| 2    | 6  | 0.00 | 0.00 | 0.00 | 0.00 | 0.00 | 0.00 | 0.01 | 0.00 | 0.00 |

|    |   |       |       |       |       |       |       |       |       |       |
|----|---|-------|-------|-------|-------|-------|-------|-------|-------|-------|
| 3  | 6 | 0.00  | 0.00  | 0.00  | 0.00  | 0.00  | 0.00  | 0.00  | 0.01  | 0.00  |
| 4  | 6 | 0.00  | 0.00  | 0.00  | 0.00  | 0.00  | 0.00  | 0.00  | 0.00  | 0.00  |
| 5  | 6 | 0.00  | 0.00  | 0.00  | 0.00  | 0.00  | 0.00  | 0.00  | 0.01  | 0.00  |
| 6  | 6 | 0.00  | 0.03  | -0.01 | 0.00  | 0.00  | 0.00  | 0.00  | 0.00  | 0.00  |
| 7  | 6 | 0.00  | 0.00  | 0.00  | 0.00  | 0.00  | 0.00  | 0.00  | 0.00  | 0.00  |
| 8  | 1 | 0.00  | 0.00  | 0.01  | 0.00  | 0.00  | 0.00  | 0.01  | 0.02  | 0.00  |
| 9  | 8 | 0.00  | 0.00  | 0.00  | 0.00  | 0.00  | 0.00  | 0.00  | 0.00  | 0.00  |
| 10 | 8 | 0.00  | 0.00  | 0.00  | 0.00  | 0.00  | 0.00  | 0.00  | 0.00  | 0.00  |
| 11 | 6 | 0.00  | 0.00  | 0.00  | 0.00  | 0.00  | 0.00  | 0.00  | -0.01 | 0.00  |
| 12 | 6 | 0.00  | 0.00  | 0.00  | 0.00  | 0.00  | 0.00  | 0.00  | 0.00  | 0.00  |
| 13 | 8 | 0.00  | -0.01 | 0.01  | 0.00  | 0.00  | 0.00  | 0.00  | 0.00  | -0.01 |
| 14 | 8 | 0.00  | -0.06 | 0.01  | 0.00  | 0.00  | 0.01  | 0.00  | 0.00  | 0.01  |
| 15 | 1 | 0.00  | 0.00  | -0.01 | 0.00  | 0.00  | 0.00  | 0.00  | 0.00  | 0.00  |
| 16 | 1 | 0.00  | 0.00  | 0.00  | 0.00  | 0.00  | 0.00  | 0.00  | 0.00  | 0.00  |
| 17 | 1 | 0.00  | 0.00  | 0.00  | 0.00  | 0.00  | 0.00  | 0.01  | -0.01 | 0.00  |
| 18 | 8 | 0.00  | 0.00  | 0.00  | 0.00  | 0.00  | 0.00  | 0.00  | 0.00  | 0.00  |
| 19 | 8 | 0.00  | 0.00  | 0.00  | 0.00  | 0.00  | 0.00  | 0.00  | 0.00  | 0.00  |
| 20 | 1 | 0.01  | 0.01  | 0.01  | 0.00  | 0.00  | 0.00  | 0.01  | 0.00  | 0.00  |
| 21 | 8 | 0.00  | 0.00  | 0.00  | 0.00  | 0.00  | 0.00  | 0.00  | 0.00  | 0.00  |
| 22 | 1 | 0.03  | 0.00  | -0.02 | 0.00  | 0.00  | 0.00  | 0.00  | 0.00  | 0.00  |
| 23 | 7 | 0.00  | 0.00  | 0.00  | -0.08 | 0.01  | 0.06  | 0.01  | 0.00  | 0.03  |
| 24 | 1 | 0.00  | 0.05  | -0.01 | -0.18 | -0.01 | -0.05 | 0.08  | 0.02  | 0.12  |
| 25 | 7 | 0.00  | -0.03 | 0.01  | 0.02  | -0.01 | -0.04 | -0.10 | -0.02 | -0.11 |
| 26 | 1 | -0.02 | 0.98  | -0.14 | 0.01  | 0.01  | -0.04 | 0.00  | 0.00  | 0.00  |
| 27 | 6 | 0.00  | 0.01  | 0.00  | 0.07  | 0.01  | 0.08  | -0.02 | 0.00  | 0.02  |
| 28 | 1 | 0.00  | -0.04 | 0.01  | 0.53  | 0.03  | 0.14  | 0.25  | 0.01  | 0.05  |
| 29 | 6 | 0.00  | 0.00  | 0.00  | -0.06 | -0.01 | -0.06 | -0.03 | 0.01  | 0.08  |
| 30 | 1 | 0.00  | 0.03  | 0.00  | -0.13 | -0.10 | -0.68 | 0.01  | 0.08  | 0.58  |
| 31 | 6 | 0.00  | 0.00  | 0.00  | 0.01  | 0.00  | 0.01  | 0.07  | -0.01 | -0.04 |
| 32 | 1 | 0.00  | 0.01  | 0.00  | 0.37  | -0.01 | -0.10 | 0.69  | -0.03 | -0.23 |
| 33 | 1 | 0.01  | 0.01  | -0.01 | 0.00  | 0.00  | 0.00  | 0.00  | 0.00  | 0.00  |

55

A

56

A

57

A

Frequencies -- 1102.2668 1153.2260 1178.1302

Red. masses -- 3.9008 5.2867 1.8073

Frc consts -- 2.7924 4.1425 1.4780

IR Inten -- 28.4775 41.1193 65.5582

Raman Activ -- 25.4420 5.7932 16.1640

Depolar (P) -- 0.0767 0.0702 0.1362

Depolar (U) -- 0.1425 0.1312 0.2397

| Atom | AN | X     | Y     | Z     | X     | Y     | Z     | X     | Y     | Z     |
|------|----|-------|-------|-------|-------|-------|-------|-------|-------|-------|
| 1    | 6  | 0.04  | -0.09 | -0.01 | -0.11 | -0.22 | 0.00  | 0.00  | 0.01  | 0.00  |
| 2    | 6  | 0.21  | 0.01  | 0.01  | 0.04  | -0.02 | 0.00  | -0.04 | 0.00  | 0.00  |
| 3    | 6  | -0.08 | 0.25  | 0.03  | -0.06 | -0.11 | -0.02 | 0.02  | 0.01  | 0.00  |
| 4    | 6  | 0.01  | -0.05 | -0.03 | 0.06  | -0.13 | -0.05 | 0.00  | 0.00  | 0.00  |
| 5    | 6  | 0.04  | 0.10  | 0.01  | -0.13 | 0.20  | 0.00  | 0.00  | -0.01 | 0.00  |
| 6    | 6  | 0.01  | -0.01 | -0.04 | 0.02  | 0.00  | -0.02 | -0.01 | 0.00  | 0.01  |
| 7    | 6  | -0.08 | -0.01 | 0.00  | 0.24  | 0.01  | 0.00  | -0.02 | -0.01 | 0.00  |
| 8    | 1  | 0.35  | 0.54  | 0.02  | -0.40 | -0.35 | 0.00  | 0.11  | 0.07  | 0.00  |
| 9    | 8  | 0.02  | 0.00  | -0.01 | 0.09  | 0.04  | -0.04 | 0.00  | 0.00  | 0.00  |
| 10   | 8  | -0.04 | 0.05  | 0.03  | -0.10 | 0.11  | 0.08  | 0.00  | 0.00  | 0.00  |
| 11   | 6  | -0.06 | -0.26 | -0.03 | -0.07 | 0.11  | 0.02  | 0.01  | 0.00  | 0.00  |
| 12   | 6  | 0.01  | 0.07  | 0.02  | 0.06  | 0.17  | 0.04  | 0.00  | 0.01  | 0.00  |
| 13   | 8  | -0.04 | -0.01 | -0.06 | -0.01 | 0.00  | -0.01 | 0.01  | 0.00  | 0.01  |
| 14   | 8  | -0.05 | 0.01  | 0.09  | -0.02 | 0.00  | 0.02  | 0.01  | 0.00  | -0.03 |
| 15   | 1  | -0.09 | -0.05 | 0.00  | 0.26  | 0.03  | 0.00  | -0.02 | -0.04 | 0.00  |
| 16   | 1  | 0.05  | -0.01 | -0.03 | 0.13  | -0.02 | -0.08 | 0.01  | -0.01 | 0.00  |
| 17   | 1  | 0.30  | -0.45 | -0.03 | -0.34 | 0.27  | 0.00  | 0.07  | -0.03 | 0.00  |
| 18   | 8  | 0.02  | 0.00  | 0.01  | 0.11  | -0.03 | 0.03  | 0.00  | 0.00  | 0.00  |
| 19   | 8  | -0.05 | -0.06 | -0.02 | -0.11 | -0.14 | -0.06 | -0.01 | 0.00  | 0.00  |

|    |   |       |       |       |       |       |       |       |       |       |
|----|---|-------|-------|-------|-------|-------|-------|-------|-------|-------|
| 20 | 1 | 0.08  | 0.03  | 0.02  | 0.22  | 0.10  | 0.08  | 0.03  | 0.02  | 0.01  |
| 21 | 8 | 0.00  | 0.00  | 0.00  | 0.00  | 0.00  | 0.00  | 0.00  | 0.00  | 0.00  |
| 22 | 1 | 0.00  | 0.00  | -0.01 | -0.01 | -0.01 | 0.00  | 0.00  | 0.00  | 0.01  |
| 23 | 7 | 0.00  | 0.00  | 0.00  | 0.01  | 0.00  | 0.01  | 0.11  | 0.00  | 0.02  |
| 24 | 1 | -0.01 | 0.00  | 0.00  | 0.04  | 0.01  | 0.06  | 0.36  | 0.06  | 0.35  |
| 25 | 7 | 0.01  | 0.00  | 0.01  | 0.00  | 0.00  | 0.01  | -0.02 | 0.01  | 0.07  |
| 26 | 1 | -0.04 | 0.01  | 0.07  | 0.00  | -0.01 | 0.01  | 0.01  | 0.01  | 0.07  |
| 27 | 6 | 0.01  | 0.00  | -0.01 | 0.02  | 0.00  | -0.01 | 0.08  | 0.00  | 0.01  |
| 28 | 1 | -0.01 | 0.00  | -0.01 | 0.06  | 0.00  | 0.00  | 0.65  | 0.02  | 0.09  |
| 29 | 6 | 0.00  | 0.00  | -0.01 | -0.01 | 0.00  | -0.01 | -0.12 | -0.01 | -0.06 |
| 30 | 1 | 0.00  | -0.01 | -0.06 | -0.01 | 0.00  | 0.00  | -0.10 | 0.04  | 0.25  |
| 31 | 6 | -0.01 | 0.00  | 0.01  | -0.02 | 0.00  | -0.01 | -0.10 | -0.02 | -0.11 |
| 32 | 1 | -0.08 | 0.00  | 0.03  | -0.08 | 0.00  | 0.01  | -0.38 | -0.01 | -0.05 |
| 33 | 1 | -0.01 | 0.01  | -0.01 | -0.02 | 0.01  | 0.00  | 0.00  | -0.01 | 0.00  |

58

59

60

A

A

A

|                |           |           |           |
|----------------|-----------|-----------|-----------|
| Frequencies -- | 1181.6654 | 1190.1389 | 1212.0644 |
| Red. masses -- | 2.2735    | 1.8810    | 1.6135    |
| Frc consts --  | 1.8704    | 1.5697    | 1.3966    |
| IR Inten --    | 71.0474   | 232.7069  | 391.1369  |
| Raman Activ -- | 1.8015    | 1.9928    | 9.1245    |
| Depolar (P) -- | 0.4843    | 0.5419    | 0.6876    |
| Depolar (U) -- | 0.6526    | 0.7029    | 0.8149    |

| Atom | AN | X     | Y     | Z     | X     | Y     | Z     | X     | Y     | Z     |
|------|----|-------|-------|-------|-------|-------|-------|-------|-------|-------|
| 1    | 6  | 0.02  | 0.01  | 0.00  | -0.04 | -0.04 | 0.01  | -0.04 | -0.03 | 0.00  |
| 2    | 6  | 0.20  | 0.03  | 0.01  | -0.09 | 0.06  | 0.00  | 0.00  | -0.04 | -0.01 |
| 3    | 6  | -0.09 | -0.02 | -0.01 | 0.00  | -0.04 | -0.01 | -0.02 | -0.02 | 0.00  |
| 4    | 6  | -0.01 | 0.01  | 0.01  | 0.03  | -0.10 | -0.04 | -0.01 | 0.07  | 0.02  |
| 5    | 6  | 0.03  | -0.02 | 0.00  | 0.02  | 0.00  | 0.00  | 0.08  | -0.06 | 0.00  |
| 6    | 6  | 0.05  | -0.01 | -0.05 | -0.02 | -0.01 | 0.03  | 0.00  | -0.01 | 0.00  |
| 7    | 6  | 0.04  | 0.04  | 0.01  | -0.02 | 0.07  | 0.01  | -0.02 | 0.05  | 0.00  |
| 8    | 1  | -0.61 | -0.35 | 0.00  | 0.04  | -0.03 | 0.01  | -0.14 | -0.10 | -0.02 |
| 9    | 8  | 0.00  | 0.00  | 0.00  | 0.05  | 0.02  | -0.02 | -0.03 | 0.00  | 0.02  |
| 10   | 8  | 0.01  | -0.01 | -0.01 | -0.08 | 0.06  | 0.06  | 0.07  | -0.03 | -0.04 |
| 11   | 6  | -0.06 | -0.02 | 0.00  | 0.06  | -0.05 | -0.01 | 0.02  | -0.03 | 0.00  |
| 12   | 6  | -0.03 | -0.10 | -0.02 | -0.01 | -0.05 | -0.01 | 0.01  | 0.07  | 0.02  |
| 13   | 8  | -0.04 | -0.01 | -0.05 | 0.02  | 0.01  | 0.02  | 0.00  | 0.00  | 0.00  |
| 14   | 8  | -0.05 | 0.01  | 0.08  | 0.02  | 0.00  | -0.04 | 0.00  | 0.00  | 0.00  |
| 15   | 1  | 0.02  | 0.41  | 0.03  | -0.05 | 0.74  | 0.06  | -0.05 | 0.65  | 0.06  |
| 16   | 1  | 0.00  | -0.01 | -0.01 | 0.26  | -0.14 | -0.17 | -0.32 | 0.20  | 0.21  |
| 17   | 1  | -0.28 | 0.08  | 0.01  | 0.41  | -0.23 | -0.01 | 0.12  | -0.08 | -0.02 |
| 18   | 8  | -0.04 | 0.01  | -0.01 | -0.03 | 0.00  | -0.01 | 0.03  | 0.00  | 0.01  |
| 19   | 8  | 0.07  | 0.07  | 0.03  | 0.04  | 0.03  | 0.02  | -0.08 | -0.04 | -0.03 |
| 20   | 1  | -0.24 | -0.16 | -0.10 | -0.16 | -0.11 | -0.07 | 0.40  | 0.32  | 0.16  |
| 21   | 8  | 0.00  | 0.00  | 0.00  | 0.00  | 0.00  | 0.00  | 0.00  | 0.00  | 0.00  |
| 22   | 1  | 0.01  | 0.00  | -0.01 | -0.01 | 0.00  | 0.00  | 0.00  | 0.00  | 0.00  |
| 23   | 7  | 0.02  | 0.00  | 0.02  | 0.00  | 0.00  | -0.01 | 0.00  | 0.00  | 0.00  |
| 24   | 1  | 0.07  | 0.01  | 0.08  | -0.01 | 0.00  | -0.02 | 0.00  | 0.00  | 0.00  |
| 25   | 7  | -0.01 | 0.00  | 0.01  | 0.00  | 0.00  | 0.00  | 0.00  | 0.00  | 0.00  |
| 26   | 1  | -0.05 | 0.02  | 0.04  | 0.02  | 0.02  | -0.01 | 0.00  | -0.01 | 0.00  |
| 27   | 6  | 0.02  | 0.00  | -0.01 | -0.01 | 0.00  | 0.01  | 0.00  | 0.00  | 0.00  |
| 28   | 1  | 0.15  | 0.00  | 0.00  | -0.04 | 0.00  | 0.00  | 0.00  | 0.00  | 0.00  |
| 29   | 6  | -0.02 | 0.00  | -0.02 | 0.00  | 0.00  | 0.00  | 0.00  | 0.00  | 0.00  |
| 30   | 1  | -0.01 | 0.01  | 0.06  | 0.00  | 0.00  | -0.01 | 0.00  | 0.00  | 0.00  |
| 31   | 6  | -0.02 | 0.00  | -0.02 | 0.00  | 0.00  | 0.00  | 0.00  | 0.00  | 0.00  |
| 32   | 1  | -0.12 | 0.00  | 0.01  | 0.04  | 0.00  | -0.01 | 0.00  | 0.00  | 0.00  |
| 33   | 1  | 0.01  | 0.01  | -0.01 | -0.01 | -0.01 | 0.01  | 0.01  | 0.00  | 0.00  |

61

62

63

A

A

A

|                |           |           |           |
|----------------|-----------|-----------|-----------|
| Frequencies -- | 1217.1969 | 1237.2319 | 1263.3396 |
|----------------|-----------|-----------|-----------|

|                |         |         |        |
|----------------|---------|---------|--------|
| Red. masses -- | 3.9350  | 1.7320  | 1.7329 |
| Frc consts --  | 3.4349  | 1.5621  | 1.6296 |
| IR Inten --    | 48.0871 | 21.6943 | 1.0907 |
| Raman Activ -- | 40.3397 | 23.8231 | 1.5723 |
| Depolar (P) -- | 0.0625  | 0.1129  | 0.6621 |
| Depolar (U) -- | 0.1177  | 0.2030  | 0.7967 |

  

| Atom | AN | X     | Y     | Z     | X     | Y     | Z     | X     | Y     | Z     |
|------|----|-------|-------|-------|-------|-------|-------|-------|-------|-------|
| 1    | 6  | 0.00  | 0.02  | 0.00  | 0.09  | 0.12  | 0.01  | 0.13  | 0.01  | 0.00  |
| 2    | 6  | -0.03 | 0.00  | 0.00  | 0.00  | -0.01 | 0.00  | -0.01 | -0.11 | -0.01 |
| 3    | 6  | 0.01  | 0.00  | 0.00  | 0.00  | 0.02  | 0.00  | -0.03 | 0.05  | 0.00  |
| 4    | 6  | 0.00  | -0.01 | 0.00  | 0.00  | -0.03 | -0.01 | -0.02 | 0.04  | 0.00  |
| 5    | 6  | 0.01  | -0.02 | 0.00  | 0.07  | -0.10 | -0.01 | -0.14 | 0.02  | 0.00  |
| 6    | 6  | 0.01  | 0.00  | -0.01 | 0.01  | 0.00  | -0.01 | -0.01 | 0.03  | 0.00  |
| 7    | 6  | -0.01 | 0.00  | 0.00  | -0.07 | -0.01 | 0.00  | -0.01 | 0.02  | 0.00  |
| 8    | 1  | 0.05  | 0.02  | 0.00  | -0.27 | -0.14 | 0.01  | -0.54 | -0.26 | -0.01 |
| 9    | 8  | 0.00  | 0.00  | 0.00  | 0.03  | -0.01 | -0.02 | -0.02 | -0.02 | 0.01  |
| 10   | 8  | -0.01 | 0.00  | 0.00  | -0.08 | 0.00  | 0.04  | 0.01  | -0.02 | -0.01 |
| 11   | 6  | 0.01  | 0.00  | 0.00  | 0.00  | 0.00  | 0.00  | 0.05  | 0.03  | 0.00  |
| 12   | 6  | 0.00  | 0.00  | 0.00  | 0.00  | 0.02  | 0.00  | 0.02  | 0.05  | 0.00  |
| 13   | 8  | 0.01  | 0.00  | 0.00  | 0.00  | 0.00  | 0.00  | 0.01  | 0.00  | 0.01  |
| 14   | 8  | 0.00  | 0.00  | 0.00  | -0.01 | 0.00  | 0.01  | 0.00  | 0.00  | 0.00  |
| 15   | 1  | -0.02 | 0.02  | 0.00  | -0.07 | -0.08 | -0.01 | -0.01 | -0.09 | -0.02 |
| 16   | 1  | 0.04  | -0.03 | -0.03 | 0.51  | -0.34 | -0.34 | 0.05  | -0.04 | -0.03 |
| 17   | 1  | 0.04  | -0.01 | 0.00  | -0.19 | 0.09  | -0.01 | 0.67  | -0.27 | -0.01 |
| 18   | 8  | 0.00  | 0.00  | 0.00  | 0.02  | 0.01  | 0.01  | 0.02  | -0.02 | 0.00  |
| 19   | 8  | -0.01 | 0.00  | 0.00  | -0.07 | -0.01 | -0.02 | 0.00  | -0.02 | 0.00  |
| 20   | 1  | 0.04  | 0.03  | 0.02  | 0.41  | 0.33  | 0.17  | -0.13 | -0.11 | -0.06 |
| 21   | 8  | 0.00  | 0.00  | 0.00  | 0.00  | 0.00  | 0.00  | 0.00  | 0.00  | 0.00  |
| 22   | 1  | 0.00  | 0.00  | 0.00  | 0.00  | 0.00  | 0.00  | 0.00  | 0.00  | 0.00  |
| 23   | 7  | -0.07 | 0.04  | 0.28  | 0.00  | 0.00  | -0.01 | 0.00  | 0.00  | 0.00  |
| 24   | 1  | 0.02  | 0.07  | 0.44  | 0.00  | 0.00  | -0.01 | 0.00  | 0.00  | 0.00  |
| 25   | 7  | -0.14 | -0.03 | -0.17 | 0.01  | 0.00  | 0.01  | 0.00  | 0.00  | 0.00  |
| 26   | 1  | 0.02  | 0.00  | -0.01 | 0.00  | 0.00  | -0.01 | 0.00  | -0.03 | 0.00  |
| 27   | 6  | 0.05  | -0.04 | -0.23 | 0.00  | 0.00  | 0.01  | 0.00  | 0.00  | 0.00  |
| 28   | 1  | 0.30  | -0.03 | -0.23 | -0.02 | 0.00  | 0.01  | 0.00  | 0.00  | 0.00  |
| 29   | 6  | 0.18  | -0.01 | -0.05 | -0.01 | 0.00  | 0.00  | 0.00  | 0.00  | 0.00  |
| 30   | 1  | 0.21  | -0.01 | -0.05 | -0.01 | 0.00  | -0.01 | 0.00  | 0.00  | 0.00  |
| 31   | 6  | 0.00  | 0.02  | 0.12  | 0.00  | 0.00  | 0.00  | 0.00  | 0.00  | 0.00  |
| 32   | 1  | -0.51 | 0.04  | 0.30  | 0.02  | 0.00  | -0.01 | 0.00  | 0.00  | 0.00  |
| 33   | 1  | 0.00  | 0.00  | 0.00  | -0.01 | 0.00  | 0.00  | 0.00  | 0.00  | 0.00  |

|  |    |    |    |
|--|----|----|----|
|  | 64 | 65 | 66 |
|  | A  | A  | A  |

  

|                |           |           |           |
|----------------|-----------|-----------|-----------|
| Frequencies -- | 1319.6539 | 1335.3566 | 1367.0584 |
| Red. masses -- | 1.6643    | 5.9516    | 4.6977    |
| Frc consts --  | 1.7077    | 6.2528    | 5.1726    |
| IR Inten --    | 30.6308   | 0.4660    | 299.2068  |
| Raman Activ -- | 28.5263   | 10.6937   | 6.7020    |
| Depolar (P) -- | 0.2087    | 0.7485    | 0.0712    |
| Depolar (U) -- | 0.3453    | 0.8561    | 0.1329    |

  

| Atom | AN | X     | Y     | Z    | X     | Y     | Z     | X     | Y     | Z     |
|------|----|-------|-------|------|-------|-------|-------|-------|-------|-------|
| 1    | 6  | 0.00  | 0.00  | 0.00 | 0.25  | -0.14 | -0.02 | -0.09 | 0.07  | 0.01  |
| 2    | 6  | 0.00  | 0.00  | 0.00 | 0.00  | 0.33  | 0.02  | -0.13 | 0.00  | 0.02  |
| 3    | 6  | 0.00  | 0.00  | 0.00 | -0.19 | -0.13 | -0.01 | 0.03  | -0.06 | -0.01 |
| 4    | 6  | 0.00  | 0.00  | 0.00 | 0.00  | -0.04 | -0.03 | 0.00  | 0.00  | 0.01  |
| 5    | 6  | 0.01  | 0.00  | 0.00 | -0.24 | -0.16 | -0.02 | -0.10 | -0.08 | -0.01 |
| 6    | 6  | 0.00  | 0.00  | 0.01 | -0.01 | -0.04 | 0.01  | 0.36  | -0.02 | -0.21 |
| 7    | 6  | 0.00  | 0.00  | 0.00 | -0.01 | 0.23  | 0.02  | 0.02  | 0.01  | 0.00  |
| 8    | 1  | -0.01 | -0.01 | 0.00 | 0.19  | 0.11  | -0.01 | 0.38  | 0.15  | 0.01  |
| 9    | 8  | 0.00  | 0.00  | 0.00 | -0.04 | -0.01 | 0.02  | 0.01  | 0.00  | -0.01 |
| 10   | 8  | 0.00  | 0.00  | 0.00 | 0.03  | 0.03  | 0.00  | -0.01 | -0.01 | 0.00  |

|    |   |       |       |       |       |       |       |       |       |       |
|----|---|-------|-------|-------|-------|-------|-------|-------|-------|-------|
| 11 | 6 | 0.00  | 0.00  | 0.00  | 0.19  | -0.11 | -0.01 | 0.06  | 0.05  | 0.00  |
| 12 | 6 | 0.00  | 0.00  | 0.00  | -0.01 | -0.05 | -0.02 | 0.00  | 0.02  | 0.00  |
| 13 | 8 | 0.00  | 0.00  | -0.01 | 0.00  | 0.01  | 0.00  | -0.07 | -0.01 | -0.05 |
| 14 | 8 | 0.00  | 0.00  | 0.00  | 0.01  | 0.00  | -0.01 | -0.11 | 0.03  | 0.22  |
| 15 | 1 | 0.00  | 0.00  | 0.00  | 0.02  | -0.42 | -0.04 | 0.02  | 0.06  | 0.01  |
| 16 | 1 | -0.01 | 0.01  | 0.01  | -0.23 | 0.18  | 0.15  | 0.06  | -0.05 | -0.04 |
| 17 | 1 | -0.01 | 0.00  | 0.00  | -0.24 | 0.11  | -0.01 | 0.34  | -0.08 | 0.00  |
| 18 | 8 | 0.00  | 0.00  | 0.00  | 0.04  | 0.00  | 0.01  | 0.01  | -0.01 | 0.01  |
| 19 | 8 | 0.00  | 0.00  | 0.00  | -0.03 | 0.03  | 0.00  | -0.01 | 0.00  | 0.00  |
| 20 | 1 | -0.01 | -0.01 | -0.01 | 0.27  | 0.25  | 0.11  | 0.01  | 0.01  | 0.00  |
| 21 | 8 | 0.00  | 0.00  | 0.00  | 0.00  | 0.00  | 0.00  | 0.00  | 0.00  | 0.01  |
| 22 | 1 | 0.00  | 0.00  | 0.00  | 0.01  | 0.00  | 0.00  | 0.02  | -0.01 | -0.06 |
| 23 | 7 | 0.05  | 0.01  | 0.07  | 0.00  | 0.00  | 0.00  | 0.03  | 0.00  | 0.01  |
| 24 | 1 | 0.40  | 0.08  | 0.51  | 0.01  | 0.01  | 0.02  | -0.03 | -0.01 | -0.05 |
| 25 | 7 | 0.07  | -0.02 | -0.13 | 0.00  | 0.00  | 0.00  | 0.02  | 0.00  | 0.00  |
| 26 | 1 | -0.01 | 0.00  | -0.02 | 0.00  | 0.05  | 0.01  | -0.03 | -0.08 | -0.59 |
| 27 | 6 | 0.03  | 0.01  | 0.06  | 0.00  | 0.00  | 0.00  | 0.00  | 0.01  | 0.04  |
| 28 | 1 | -0.63 | -0.01 | -0.02 | -0.02 | 0.00  | 0.00  | -0.08 | 0.00  | 0.03  |
| 29 | 6 | -0.05 | 0.01  | 0.06  | 0.00  | 0.00  | 0.00  | -0.03 | 0.00  | -0.02 |
| 30 | 1 | -0.10 | -0.04 | -0.30 | 0.00  | 0.00  | -0.01 | -0.03 | 0.01  | 0.08  |
| 31 | 6 | -0.11 | -0.01 | -0.04 | 0.00  | 0.00  | 0.00  | 0.01  | 0.00  | -0.01 |
| 32 | 1 | 0.09  | -0.02 | -0.11 | 0.00  | 0.00  | 0.00  | -0.08 | 0.00  | 0.01  |
| 33 | 1 | 0.00  | 0.00  | 0.00  | 0.00  | -0.01 | 0.00  | -0.01 | 0.05  | -0.05 |

67

68

69

A

A

A

|                |           |           |           |
|----------------|-----------|-----------|-----------|
| Frequencies -- | 1388.1626 | 1400.9350 | 1414.9839 |
| Red. masses -- | 2.5738    | 2.9427    | 2.9004    |
| Frc consts --  | 2.9222    | 3.4028    | 3.4214    |
| IR Inten --    | 248.8886  | 17.5980   | 65.8697   |
| Raman Activ -- | 1.6944    | 19.3325   | 11.7977   |
| Depolar (P) -- | 0.3804    | 0.1896    | 0.1498    |
| Depolar (U) -- | 0.5511    | 0.3187    | 0.2606    |

Atom AN

X

Y

Z

X

Y

Z

X

Y

Z

|    |   |       |       |       |       |       |       |       |       |       |
|----|---|-------|-------|-------|-------|-------|-------|-------|-------|-------|
| 1  | 6 | 0.01  | -0.05 | 0.00  | -0.09 | -0.08 | 0.00  | 0.01  | -0.02 | 0.00  |
| 2  | 6 | 0.00  | 0.00  | 0.00  | 0.07  | -0.01 | 0.00  | 0.01  | 0.00  | 0.00  |
| 3  | 6 | -0.07 | -0.04 | 0.00  | -0.04 | -0.03 | 0.00  | 0.00  | 0.01  | 0.00  |
| 4  | 6 | -0.04 | 0.18  | 0.06  | -0.05 | 0.24  | 0.08  | 0.00  | 0.00  | 0.00  |
| 5  | 6 | 0.03  | -0.07 | 0.00  | -0.10 | 0.07  | 0.00  | 0.01  | 0.01  | 0.00  |
| 6  | 6 | -0.01 | 0.00  | 0.01  | -0.03 | 0.00  | 0.02  | -0.05 | 0.00  | 0.03  |
| 7  | 6 | -0.01 | 0.04  | 0.00  | 0.08  | 0.00  | 0.00  | 0.00  | 0.00  | 0.00  |
| 8  | 1 | 0.19  | 0.12  | 0.00  | 0.29  | 0.17  | 0.00  | -0.04 | -0.02 | 0.00  |
| 9  | 8 | 0.03  | -0.02 | -0.02 | 0.05  | -0.02 | -0.03 | 0.00  | 0.00  | 0.00  |
| 10 | 8 | -0.01 | -0.06 | -0.01 | -0.02 | -0.08 | -0.01 | 0.00  | 0.00  | 0.00  |
| 11 | 6 | 0.07  | -0.04 | 0.00  | -0.02 | 0.02  | 0.00  | -0.01 | -0.01 | 0.00  |
| 12 | 6 | 0.03  | 0.24  | 0.05  | -0.02 | -0.18 | -0.04 | 0.00  | 0.00  | 0.00  |
| 13 | 8 | 0.00  | 0.00  | 0.00  | 0.00  | 0.00  | 0.00  | 0.00  | 0.00  | -0.01 |
| 14 | 8 | 0.00  | 0.00  | -0.01 | 0.01  | 0.00  | -0.02 | 0.02  | 0.00  | 0.00  |
| 15 | 1 | -0.02 | 0.17  | 0.02  | 0.09  | 0.06  | 0.01  | 0.00  | -0.01 | 0.00  |
| 16 | 1 | 0.33  | -0.26 | -0.23 | 0.44  | -0.34 | -0.30 | 0.00  | 0.00  | 0.00  |
| 17 | 1 | -0.33 | 0.16  | 0.00  | 0.26  | -0.11 | 0.00  | -0.05 | 0.01  | 0.00  |
| 18 | 8 | -0.04 | -0.03 | -0.02 | 0.05  | 0.02  | 0.02  | 0.00  | 0.00  | 0.00  |
| 19 | 8 | 0.03  | -0.07 | -0.01 | -0.02 | 0.06  | 0.00  | 0.00  | 0.00  | 0.00  |
| 20 | 1 | -0.46 | -0.41 | -0.20 | 0.32  | 0.30  | 0.14  | 0.00  | 0.00  | 0.00  |
| 21 | 8 | 0.00  | 0.00  | 0.00  | 0.00  | 0.00  | 0.00  | 0.00  | 0.00  | 0.00  |
| 22 | 1 | 0.00  | 0.00  | 0.01  | 0.01  | 0.01  | 0.02  | 0.00  | 0.00  | 0.00  |
| 23 | 7 | 0.00  | 0.00  | 0.00  | 0.00  | 0.00  | 0.00  | 0.01  | 0.02  | 0.14  |
| 24 | 1 | 0.00  | 0.00  | 0.00  | 0.01  | 0.00  | 0.01  | -0.31 | -0.05 | -0.29 |
| 25 | 7 | 0.00  | 0.00  | 0.00  | 0.00  | 0.00  | -0.01 | 0.16  | -0.02 | -0.15 |
| 26 | 1 | 0.00  | 0.01  | 0.02  | -0.01 | 0.01  | 0.08  | 0.01  | -0.03 | -0.23 |
| 27 | 6 | 0.00  | 0.00  | 0.00  | 0.00  | 0.00  | 0.00  | -0.17 | 0.02  | 0.14  |

|    |   |      |      |      |      |       |       |       |       |       |
|----|---|------|------|------|------|-------|-------|-------|-------|-------|
| 28 | 1 | 0.00 | 0.00 | 0.00 | 0.00 | 0.00  | 0.00  | 0.08  | 0.03  | 0.19  |
| 29 | 6 | 0.00 | 0.00 | 0.00 | 0.00 | 0.00  | 0.00  | -0.08 | -0.01 | -0.06 |
| 30 | 1 | 0.00 | 0.00 | 0.00 | 0.00 | 0.00  | -0.01 | -0.06 | 0.06  | 0.39  |
| 31 | 6 | 0.00 | 0.00 | 0.00 | 0.00 | 0.00  | 0.00  | 0.14  | -0.01 | -0.09 |
| 32 | 1 | 0.00 | 0.00 | 0.00 | 0.00 | 0.00  | 0.00  | -0.62 | 0.02  | 0.13  |
| 33 | 1 | 0.01 | 0.00 | 0.00 | 0.02 | -0.01 | 0.01  | 0.00  | 0.00  | 0.00  |

|                |  |           |  |    |  |           |  |  |  |           |
|----------------|--|-----------|--|----|--|-----------|--|--|--|-----------|
|                |  | 70        |  | 71 |  | 72        |  |  |  |           |
|                |  | A         |  | A  |  | A         |  |  |  |           |
| Frequencies -- |  | 1456.2150 |  |    |  | 1506.8138 |  |  |  | 1515.6774 |
| Red. masses -- |  | 4.0610    |  |    |  | 2.5523    |  |  |  | 2.9778    |
| Frc consts --  |  | 5.0738    |  |    |  | 3.4143    |  |  |  | 4.0305    |
| IR Inten --    |  | 25.7346   |  |    |  | 6.4817    |  |  |  | 4.5594    |
| Raman Activ -- |  | 35.3430   |  |    |  | 0.4034    |  |  |  | 10.8438   |
| Depolar (P) -- |  | 0.6097    |  |    |  | 0.4183    |  |  |  | 0.2504    |
| Depolar (U) -- |  | 0.7576    |  |    |  | 0.5899    |  |  |  | 0.4005    |

|      |    |       |       |       |       |       |       |       |       |       |
|------|----|-------|-------|-------|-------|-------|-------|-------|-------|-------|
| Atom | AN | X     | Y     | Z     | X     | Y     | Z     | X     | Y     | Z     |
| 1    | 6  | -0.01 | 0.01  | 0.00  | -0.11 | -0.12 | -0.01 | 0.12  | -0.17 | -0.02 |
| 2    | 6  | 0.00  | 0.00  | 0.00  | -0.03 | 0.10  | 0.01  | -0.20 | -0.02 | 0.00  |
| 3    | 6  | 0.00  | 0.00  | 0.00  | 0.15  | -0.01 | 0.00  | 0.03  | 0.09  | 0.01  |
| 4    | 6  | 0.00  | -0.01 | 0.00  | -0.01 | 0.05  | 0.02  | -0.02 | 0.09  | 0.01  |
| 5    | 6  | -0.01 | -0.01 | 0.00  | 0.13  | -0.06 | 0.00  | 0.07  | 0.20  | 0.02  |
| 6    | 6  | 0.03  | 0.00  | 0.00  | 0.01  | -0.02 | 0.00  | 0.04  | 0.01  | 0.00  |
| 7    | 6  | 0.00  | 0.00  | 0.00  | -0.02 | 0.19  | 0.02  | -0.07 | -0.03 | 0.00  |
| 8    | 1  | 0.03  | 0.01  | 0.00  | -0.32 | -0.33 | -0.03 | -0.33 | -0.12 | -0.01 |
| 9    | 8  | 0.00  | 0.00  | 0.00  | 0.03  | 0.00  | -0.01 | 0.00  | -0.01 | 0.00  |
| 10   | 8  | 0.00  | 0.00  | 0.00  | 0.00  | -0.01 | 0.00  | 0.01  | -0.01 | 0.00  |
| 11   | 6  | 0.00  | 0.01  | 0.00  | -0.12 | -0.05 | -0.01 | 0.08  | -0.08 | -0.01 |
| 12   | 6  | 0.00  | 0.00  | 0.00  | 0.01  | 0.02  | 0.01  | -0.01 | -0.09 | -0.01 |
| 13   | 8  | -0.01 | 0.00  | -0.01 | 0.00  | 0.00  | -0.01 | -0.01 | 0.00  | -0.02 |
| 14   | 8  | -0.01 | 0.00  | 0.01  | 0.00  | 0.00  | 0.01  | 0.02  | 0.01  | 0.04  |
| 15   | 1  | 0.00  | 0.00  | 0.00  | 0.02  | -0.67 | -0.06 | -0.10 | 0.09  | 0.01  |
| 16   | 1  | 0.00  | 0.00  | 0.00  | 0.05  | -0.03 | -0.04 | 0.04  | -0.03 | -0.03 |
| 17   | 1  | 0.03  | -0.01 | 0.00  | 0.31  | -0.29 | -0.02 | -0.48 | 0.20  | 0.01  |
| 18   | 8  | 0.00  | 0.00  | 0.00  | -0.02 | 0.00  | -0.01 | 0.00  | 0.01  | 0.00  |
| 19   | 8  | 0.00  | 0.00  | 0.00  | 0.00  | 0.00  | 0.00  | 0.00  | 0.01  | 0.00  |
| 20   | 1  | 0.00  | 0.00  | 0.00  | -0.02 | -0.02 | -0.01 | 0.04  | 0.04  | 0.02  |
| 21   | 8  | 0.00  | 0.00  | 0.00  | 0.00  | 0.00  | 0.00  | 0.00  | 0.00  | 0.00  |
| 22   | 1  | 0.00  | 0.00  | 0.00  | 0.00  | 0.00  | 0.00  | 0.02  | 0.01  | 0.00  |
| 23   | 7  | -0.08 | 0.00  | 0.00  | 0.00  | 0.00  | 0.00  | -0.01 | 0.00  | -0.02 |
| 24   | 1  | 0.13  | 0.04  | 0.28  | 0.01  | 0.00  | 0.01  | 0.07  | 0.01  | 0.09  |
| 25   | 7  | 0.12  | 0.01  | 0.07  | 0.00  | 0.00  | 0.00  | -0.01 | 0.00  | 0.03  |
| 26   | 1  | -0.02 | 0.00  | 0.03  | 0.01  | 0.00  | -0.08 | 0.05  | -0.09 | -0.62 |
| 27   | 6  | -0.20 | -0.03 | -0.18 | 0.00  | 0.00  | 0.00  | 0.01  | 0.00  | -0.02 |
| 28   | 1  | 0.49  | -0.02 | -0.13 | 0.00  | 0.00  | 0.00  | 0.02  | 0.00  | -0.02 |
| 29   | 6  | 0.03  | 0.05  | 0.35  | 0.00  | 0.00  | 0.00  | 0.00  | 0.00  | 0.01  |
| 30   | 1  | -0.06 | -0.08 | -0.55 | 0.00  | 0.00  | 0.00  | 0.00  | 0.00  | -0.02 |
| 31   | 6  | 0.09  | -0.03 | -0.20 | 0.00  | 0.00  | 0.00  | 0.00  | 0.00  | 0.01  |
| 32   | 1  | -0.20 | -0.02 | -0.15 | 0.00  | 0.00  | 0.00  | 0.03  | 0.00  | 0.00  |
| 33   | 1  | 0.00  | 0.00  | 0.00  | 0.00  | 0.00  | 0.00  | 0.01  | -0.01 | 0.00  |

|                |    |           |       |      |      |           |      |      |      |           |
|----------------|----|-----------|-------|------|------|-----------|------|------|------|-----------|
|                |    | 73        |       | 74   |      | 75        |      |      |      |           |
|                |    | A         |       | A    |      | A         |      |      |      |           |
| Frequencies -- |    | 1538.4662 |       |      |      | 1553.0064 |      |      |      | 1592.3007 |
| Red. masses -- |    | 2.3482    |       |      |      | 1.8990    |      |      |      | 2.6438    |
| Frc consts --  |    | 3.2746    |       |      |      | 2.6985    |      |      |      | 3.9494    |
| IR Inten --    |    | 35.4002   |       |      |      | 33.4515   |      |      |      | 11.3114   |
| Raman Activ -- |    | 10.5449   |       |      |      | 1.7861    |      |      |      | 6.2853    |
| Depolar (P) -- |    | 0.7014    |       |      |      | 0.3137    |      |      |      | 0.6277    |
| Depolar (U) -- |    | 0.8245    |       |      |      | 0.4776    |      |      |      | 0.7712    |
| Atom           | AN | X         | Y     | Z    | X    | Y         | Z    | X    | Y    | Z         |
| 1              | 6  | 0.02      | -0.04 | 0.00 | 0.01 | -0.04     | 0.00 | 0.00 | 0.01 | 0.00      |

|    |   |       |       |       |       |       |       |       |       |       |
|----|---|-------|-------|-------|-------|-------|-------|-------|-------|-------|
| 2  | 6 | -0.05 | 0.00  | 0.00  | -0.06 | 0.00  | 0.00  | 0.02  | 0.00  | 0.00  |
| 3  | 6 | 0.02  | 0.02  | 0.00  | 0.02  | 0.02  | 0.00  | -0.01 | -0.01 | 0.00  |
| 4  | 6 | 0.00  | 0.01  | 0.00  | -0.01 | 0.02  | 0.00  | 0.00  | 0.00  | 0.00  |
| 5  | 6 | 0.02  | 0.04  | 0.00  | 0.01  | 0.04  | 0.00  | 0.00  | -0.01 | 0.00  |
| 6  | 6 | 0.05  | -0.02 | -0.09 | 0.08  | -0.02 | -0.10 | -0.05 | 0.00  | 0.01  |
| 7  | 6 | -0.02 | 0.00  | 0.00  | -0.02 | 0.00  | 0.00  | 0.01  | 0.00  | 0.00  |
| 8  | 1 | -0.08 | -0.04 | 0.00  | -0.08 | -0.04 | 0.00  | 0.02  | 0.02  | 0.00  |
| 9  | 8 | 0.00  | 0.00  | 0.00  | 0.00  | 0.00  | 0.00  | 0.00  | 0.00  | 0.00  |
| 10 | 8 | 0.00  | 0.00  | 0.00  | 0.00  | 0.00  | 0.00  | 0.00  | 0.00  | 0.00  |
| 11 | 6 | 0.02  | -0.02 | 0.00  | 0.03  | -0.02 | 0.00  | -0.01 | 0.01  | 0.00  |
| 12 | 6 | 0.00  | -0.01 | 0.00  | 0.00  | -0.02 | 0.00  | 0.00  | 0.00  | 0.00  |
| 13 | 8 | 0.01  | 0.01  | 0.05  | 0.01  | 0.01  | 0.05  | 0.01  | 0.00  | 0.00  |
| 14 | 8 | -0.04 | 0.00  | -0.01 | -0.05 | 0.00  | -0.02 | 0.02  | 0.00  | 0.01  |
| 15 | 1 | -0.02 | 0.00  | 0.00  | -0.03 | 0.00  | 0.00  | 0.01  | 0.00  | 0.00  |
| 16 | 1 | 0.01  | 0.00  | -0.01 | 0.01  | -0.01 | -0.01 | 0.00  | 0.00  | 0.00  |
| 17 | 1 | -0.09 | 0.04  | 0.00  | -0.09 | 0.04  | 0.00  | 0.03  | -0.01 | 0.00  |
| 18 | 8 | 0.00  | 0.00  | 0.00  | 0.00  | 0.00  | 0.00  | 0.00  | 0.00  | 0.00  |
| 19 | 8 | 0.00  | 0.00  | 0.00  | 0.00  | 0.00  | 0.00  | 0.00  | 0.00  | 0.00  |
| 20 | 1 | 0.00  | 0.00  | 0.00  | 0.00  | 0.00  | 0.00  | 0.00  | 0.00  | 0.00  |
| 21 | 8 | 0.00  | 0.00  | 0.00  | 0.00  | 0.00  | 0.00  | 0.00  | 0.00  | 0.00  |
| 22 | 1 | -0.03 | -0.02 | -0.03 | -0.03 | -0.02 | -0.03 | 0.01  | 0.01  | 0.02  |
| 23 | 7 | 0.17  | 0.01  | 0.08  | -0.09 | 0.00  | -0.02 | 0.08  | 0.01  | 0.09  |
| 24 | 1 | -0.30 | -0.09 | -0.58 | 0.02  | 0.02  | 0.16  | -0.39 | -0.08 | -0.54 |
| 25 | 7 | 0.00  | -0.01 | -0.04 | -0.01 | 0.00  | -0.02 | -0.16 | 0.00  | 0.02  |
| 26 | 1 | -0.03 | 0.08  | 0.58  | -0.07 | 0.12  | 0.87  | 0.07  | -0.05 | -0.32 |
| 27 | 6 | -0.09 | 0.00  | -0.01 | 0.09  | 0.00  | 0.03  | 0.21  | 0.00  | -0.03 |
| 28 | 1 | 0.10  | 0.00  | 0.01  | -0.19 | 0.00  | 0.00  | -0.38 | -0.02 | -0.12 |
| 29 | 6 | 0.08  | 0.01  | 0.04  | -0.08 | 0.00  | 0.00  | -0.10 | 0.02  | 0.13  |
| 30 | 1 | 0.07  | -0.02 | -0.14 | -0.09 | 0.01  | 0.06  | -0.16 | -0.03 | -0.20 |
| 31 | 6 | -0.18 | 0.00  | -0.03 | 0.14  | 0.00  | -0.03 | 0.08  | -0.02 | -0.14 |
| 32 | 1 | 0.16  | -0.02 | -0.14 | -0.21 | 0.01  | 0.08  | -0.28 | -0.01 | -0.07 |
| 33 | 1 | -0.02 | 0.04  | -0.03 | -0.03 | 0.04  | -0.03 | 0.01  | -0.02 | 0.02  |

76

77

78

A

A

A

|                |           |           |           |
|----------------|-----------|-----------|-----------|
| Frequencies -- | 1660.3035 | 1666.4214 | 1669.8032 |
| Red. masses -- | 7.4933    | 1.7771    | 1.9525    |
| Frc consts --  | 12.1702   | 2.9076    | 3.2075    |
| IR Inten --    | 63.8524   | 91.0739   | 63.0408   |
| Raman Activ -- | 35.7473   | 13.9560   | 9.9870    |
| Depolar (P) -- | 0.7492    | 0.6968    | 0.7163    |
| Depolar (U) -- | 0.8566    | 0.8213    | 0.8347    |

| Atom | AN | X     | Y     | Z     | X     | Y     | Z     | X     | Y     | Z     |
|------|----|-------|-------|-------|-------|-------|-------|-------|-------|-------|
| 1    | 6  | -0.03 | 0.26  | 0.02  | -0.10 | 0.02  | 0.00  | -0.12 | 0.02  | 0.00  |
| 2    | 6  | 0.00  | -0.35 | -0.03 | 0.06  | -0.01 | 0.00  | 0.08  | -0.01 | 0.00  |
| 3    | 6  | -0.14 | -0.26 | -0.02 | 0.11  | 0.04  | 0.00  | 0.12  | 0.04  | 0.00  |
| 4    | 6  | 0.00  | -0.06 | 0.00  | -0.02 | -0.02 | 0.01  | 0.00  | 0.00  | 0.00  |
| 5    | 6  | 0.08  | 0.27  | 0.02  | -0.10 | -0.01 | 0.00  | -0.11 | -0.01 | 0.00  |
| 6    | 6  | 0.00  | 0.04  | -0.02 | 0.01  | 0.01  | 0.02  | -0.03 | 0.00  | 0.02  |
| 7    | 6  | 0.00  | 0.41  | 0.04  | -0.07 | 0.01  | 0.00  | -0.07 | 0.02  | 0.00  |
| 8    | 1  | 0.34  | 0.01  | 0.00  | -0.12 | -0.11 | -0.01 | -0.13 | -0.12 | -0.01 |
| 9    | 8  | 0.00  | 0.01  | 0.00  | 0.02  | 0.01  | -0.01 | 0.01  | 0.00  | 0.00  |
| 10   | 8  | 0.00  | 0.00  | 0.00  | 0.00  | 0.00  | 0.00  | 0.00  | 0.00  | 0.00  |
| 11   | 6  | 0.09  | -0.22 | -0.02 | 0.12  | -0.05 | 0.00  | 0.14  | -0.05 | 0.00  |
| 12   | 6  | 0.02  | -0.06 | 0.00  | -0.01 | 0.01  | 0.00  | -0.01 | 0.00  | 0.00  |
| 13   | 8  | 0.01  | 0.00  | 0.01  | -0.01 | 0.00  | -0.01 | 0.00  | 0.00  | 0.00  |
| 14   | 8  | 0.00  | 0.00  | 0.00  | 0.00  | 0.00  | 0.00  | 0.01  | 0.00  | -0.01 |
| 15   | 1  | 0.05  | -0.45 | -0.05 | -0.08 | -0.01 | 0.00  | -0.08 | -0.02 | 0.00  |
| 16   | 1  | -0.03 | 0.01  | 0.02  | -0.01 | 0.01  | 0.01  | 0.00  | 0.00  | -0.01 |
| 17   | 1  | -0.27 | -0.07 | -0.01 | -0.17 | 0.10  | 0.01  | -0.19 | 0.11  | 0.01  |
| 18   | 8  | -0.01 | 0.01  | 0.00  | 0.02  | 0.00  | 0.00  | 0.01  | 0.00  | 0.00  |



|    |   |      |       |      |       |       |       |       |       |       |
|----|---|------|-------|------|-------|-------|-------|-------|-------|-------|
| 19 | 8 | 0.00 | 0.00  | 0.00 | 0.00  | 0.00  | 0.00  | 0.00  | 0.00  | 0.00  |
| 20 | 1 | 0.03 | 0.02  | 0.01 | 0.00  | 0.00  | 0.00  | 0.00  | 0.00  | 0.00  |
| 21 | 8 | 0.00 | 0.00  | 0.00 | -0.03 | 0.01  | -0.05 | 0.03  | -0.01 | 0.05  |
| 22 | 1 | 0.02 | 0.02  | 0.04 | 0.25  | 0.32  | 0.52  | -0.24 | -0.32 | -0.51 |
| 23 | 7 | 0.00 | 0.00  | 0.00 | 0.00  | 0.00  | 0.00  | 0.00  | 0.00  | 0.00  |
| 24 | 1 | 0.00 | -0.01 | 0.01 | -0.02 | 0.00  | -0.03 | 0.00  | 0.00  | 0.00  |
| 25 | 7 | 0.00 | 0.00  | 0.00 | 0.00  | 0.00  | 0.00  | -0.01 | 0.00  | 0.00  |
| 26 | 1 | 0.00 | -0.03 | 0.02 | 0.00  | 0.01  | 0.05  | 0.00  | -0.02 | -0.08 |
| 27 | 6 | 0.00 | 0.00  | 0.00 | 0.00  | 0.00  | 0.00  | 0.00  | 0.00  | 0.00  |
| 28 | 1 | 0.00 | 0.00  | 0.00 | 0.00  | 0.00  | 0.00  | 0.00  | 0.00  | 0.00  |
| 29 | 6 | 0.00 | 0.00  | 0.00 | 0.00  | 0.00  | 0.00  | 0.00  | 0.00  | 0.00  |
| 30 | 1 | 0.00 | 0.00  | 0.00 | 0.00  | 0.00  | 0.00  | 0.00  | 0.00  | 0.00  |
| 31 | 6 | 0.00 | 0.00  | 0.00 | 0.00  | 0.00  | 0.00  | 0.00  | 0.00  | 0.00  |
| 32 | 1 | 0.00 | 0.00  | 0.00 | 0.00  | 0.00  | 0.00  | 0.00  | 0.00  | 0.00  |
| 33 | 1 | 0.02 | -0.03 | 0.02 | 0.31  | -0.46 | 0.34  | -0.30 | 0.46  | -0.34 |

79

80

81

A

A

A

|                |           |           |           |
|----------------|-----------|-----------|-----------|
| Frequencies -- | 1807.2590 | 1833.8714 | 1853.2079 |
|----------------|-----------|-----------|-----------|

|                |        |         |         |
|----------------|--------|---------|---------|
| Red. masses -- | 7.0440 | 10.1103 | 10.3695 |
|----------------|--------|---------|---------|

|               |         |         |         |
|---------------|---------|---------|---------|
| Frc consts -- | 13.5553 | 20.0332 | 20.9825 |
|---------------|---------|---------|---------|

|             |          |          |          |
|-------------|----------|----------|----------|
| IR Inten -- | 259.5250 | 180.3863 | 596.2173 |
|-------------|----------|----------|----------|

|                |         |         |         |
|----------------|---------|---------|---------|
| Raman Activ -- | 25.5500 | 32.1524 | 75.6214 |
|----------------|---------|---------|---------|

|                |        |        |        |
|----------------|--------|--------|--------|
| Depolar (P) -- | 0.2784 | 0.3705 | 0.1039 |
|----------------|--------|--------|--------|

|                |        |        |        |
|----------------|--------|--------|--------|
| Depolar (U) -- | 0.4355 | 0.5407 | 0.1882 |
|----------------|--------|--------|--------|

| Atom | AN | X     | Y     | Z     | X     | Y     | Z     | X     | Y     | Z     |
|------|----|-------|-------|-------|-------|-------|-------|-------|-------|-------|
| 1    | 6  | 0.03  | 0.01  | 0.00  | -0.08 | -0.03 | 0.01  | -0.04 | -0.02 | 0.00  |
| 2    | 6  | -0.07 | -0.01 | -0.02 | 0.01  | -0.01 | -0.01 | 0.03  | 0.01  | 0.00  |
| 3    | 6  | -0.01 | -0.01 | 0.00  | 0.01  | -0.02 | 0.00  | 0.02  | 0.01  | 0.00  |
| 4    | 6  | -0.08 | -0.02 | 0.03  | 0.60  | 0.18  | -0.24 | 0.23  | 0.07  | -0.09 |
| 5    | 6  | 0.02  | 0.01  | 0.00  | 0.02  | 0.00  | 0.00  | -0.10 | 0.02  | -0.01 |
| 6    | 6  | 0.30  | 0.11  | 0.49  | 0.05  | 0.03  | 0.06  | 0.06  | 0.01  | 0.05  |
| 7    | 6  | 0.00  | 0.00  | 0.00  | 0.00  | 0.03  | 0.00  | -0.01 | -0.01 | 0.00  |
| 8    | 1  | 0.02  | 0.02  | 0.00  | 0.00  | -0.04 | 0.00  | -0.02 | -0.02 | 0.00  |
| 9    | 8  | 0.05  | 0.01  | -0.02 | -0.37 | -0.09 | 0.16  | -0.14 | -0.04 | 0.06  |
| 10   | 8  | 0.01  | 0.00  | 0.00  | -0.06 | 0.00  | 0.03  | -0.02 | 0.00  | 0.01  |
| 11   | 6  | -0.01 | 0.00  | 0.00  | 0.01  | -0.02 | 0.00  | 0.02  | 0.01  | 0.00  |
| 12   | 6  | -0.03 | 0.00  | -0.01 | -0.26 | 0.03  | -0.06 | 0.66  | -0.10 | 0.15  |
| 13   | 8  | -0.18 | -0.06 | -0.30 | -0.03 | -0.01 | -0.04 | -0.03 | -0.01 | -0.04 |
| 14   | 8  | 0.01  | -0.01 | -0.08 | 0.00  | -0.01 | -0.01 | -0.01 | 0.00  | -0.01 |
| 15   | 1  | 0.01  | 0.00  | 0.00  | 0.00  | -0.03 | 0.00  | -0.01 | 0.01  | 0.00  |
| 16   | 1  | -0.04 | 0.02  | 0.03  | 0.31  | -0.22 | -0.21 | 0.12  | -0.08 | -0.08 |
| 17   | 1  | 0.01  | -0.01 | 0.00  | -0.01 | -0.01 | 0.00  | -0.01 | 0.04  | 0.00  |
| 18   | 8  | 0.02  | 0.00  | 0.00  | 0.16  | -0.02 | 0.04  | -0.41 | 0.04  | -0.10 |
| 19   | 8  | 0.00  | 0.00  | 0.00  | 0.02  | 0.00  | 0.01  | -0.06 | -0.01 | -0.02 |
| 20   | 1  | -0.01 | -0.01 | 0.00  | -0.12 | -0.10 | -0.05 | 0.31  | 0.26  | 0.13  |
| 21   | 8  | 0.01  | 0.00  | 0.01  | 0.00  | 0.00  | -0.01 | 0.00  | 0.00  | 0.00  |
| 22   | 1  | -0.05 | -0.07 | -0.11 | 0.03  | 0.03  | 0.06  | 0.02  | 0.02  | 0.03  |
| 23   | 7  | 0.01  | 0.00  | 0.03  | 0.00  | 0.00  | 0.00  | 0.00  | 0.00  | 0.00  |
| 24   | 1  | -0.13 | -0.04 | -0.24 | -0.02 | 0.01  | -0.04 | -0.02 | -0.01 | -0.03 |
| 25   | 7  | -0.03 | 0.00  | -0.01 | 0.00  | 0.00  | 0.00  | 0.00  | 0.00  | 0.00  |
| 26   | 1  | -0.17 | 0.08  | 0.59  | -0.03 | 0.05  | 0.09  | -0.02 | 0.00  | 0.10  |
| 27   | 6  | 0.02  | 0.00  | 0.00  | 0.00  | 0.00  | 0.00  | 0.00  | 0.00  | 0.00  |
| 28   | 1  | -0.02 | 0.00  | -0.01 | 0.00  | 0.00  | 0.00  | 0.00  | 0.00  | 0.00  |
| 29   | 6  | 0.00  | 0.00  | 0.00  | 0.00  | 0.00  | 0.00  | 0.00  | 0.00  | 0.00  |
| 30   | 1  | -0.01 | 0.00  | -0.02 | 0.00  | 0.00  | 0.00  | 0.00  | 0.00  | 0.00  |
| 31   | 6  | 0.00  | 0.00  | -0.02 | 0.00  | 0.00  | 0.00  | 0.00  | 0.00  | 0.00  |
| 32   | 1  | -0.03 | 0.00  | -0.01 | 0.00  | 0.00  | 0.00  | 0.00  | 0.00  | 0.00  |
| 33   | 1  | -0.06 | 0.09  | -0.07 | 0.00  | -0.08 | 0.06  | 0.01  | -0.04 | 0.02  |

82

83

84

A

A

A



|    |   |       |       |      |       |       |       |       |       |       |
|----|---|-------|-------|------|-------|-------|-------|-------|-------|-------|
| 10 | 8 | 0.00  | 0.00  | 0.00 | 0.00  | 0.00  | 0.00  | 0.00  | 0.00  | 0.00  |
| 11 | 6 | -0.02 | -0.05 | 0.00 | 0.00  | 0.00  | 0.00  | 0.00  | 0.00  | 0.00  |
| 12 | 6 | 0.00  | 0.00  | 0.00 | 0.00  | 0.00  | 0.00  | 0.00  | 0.00  | 0.00  |
| 13 | 8 | 0.00  | 0.00  | 0.00 | 0.00  | 0.00  | 0.00  | 0.00  | 0.00  | 0.00  |
| 14 | 8 | 0.00  | 0.00  | 0.00 | 0.00  | 0.00  | 0.00  | 0.00  | 0.00  | 0.00  |
| 15 | 1 | 0.46  | 0.02  | 0.00 | 0.00  | 0.00  | 0.00  | 0.00  | 0.00  | 0.00  |
| 16 | 1 | 0.00  | 0.00  | 0.00 | 0.00  | 0.00  | 0.00  | 0.00  | 0.00  | 0.00  |
| 17 | 1 | 0.29  | 0.58  | 0.05 | 0.00  | 0.00  | 0.00  | 0.00  | 0.00  | 0.00  |
| 18 | 8 | 0.00  | 0.00  | 0.00 | 0.00  | 0.00  | 0.00  | 0.00  | 0.00  | 0.00  |
| 19 | 8 | 0.00  | 0.00  | 0.00 | 0.00  | 0.00  | 0.00  | 0.00  | 0.00  | 0.00  |
| 20 | 1 | 0.00  | 0.00  | 0.00 | 0.00  | 0.00  | 0.00  | 0.00  | 0.00  | 0.00  |
| 21 | 8 | 0.00  | 0.00  | 0.00 | 0.00  | 0.00  | 0.00  | 0.00  | 0.00  | 0.00  |
| 22 | 1 | 0.00  | 0.00  | 0.00 | 0.00  | 0.00  | 0.00  | 0.00  | 0.00  | 0.00  |
| 23 | 7 | 0.00  | 0.00  | 0.00 | 0.00  | 0.00  | 0.00  | 0.00  | 0.00  | 0.00  |
| 24 | 1 | 0.00  | 0.00  | 0.00 | 0.00  | 0.00  | 0.00  | 0.00  | 0.00  | 0.01  |
| 25 | 7 | 0.00  | 0.00  | 0.00 | 0.00  | 0.00  | 0.00  | 0.00  | 0.00  | 0.00  |
| 26 | 1 | 0.00  | 0.00  | 0.00 | -0.01 | 0.00  | 0.00  | 0.01  | 0.00  | 0.00  |
| 27 | 6 | 0.00  | 0.00  | 0.00 | 0.01  | -0.01 | -0.08 | 0.00  | 0.01  | 0.04  |
| 28 | 1 | 0.00  | 0.00  | 0.00 | -0.11 | 0.13  | 0.86  | 0.05  | -0.06 | -0.40 |
| 29 | 6 | 0.00  | 0.00  | 0.00 | -0.04 | 0.00  | 0.01  | -0.05 | 0.00  | 0.00  |
| 30 | 1 | 0.00  | 0.00  | 0.00 | 0.44  | -0.01 | -0.05 | 0.56  | -0.01 | -0.05 |
| 31 | 6 | 0.00  | 0.00  | 0.00 | 0.00  | 0.00  | 0.01  | 0.02  | 0.01  | 0.06  |
| 32 | 1 | 0.00  | 0.00  | 0.00 | -0.05 | -0.02 | -0.15 | -0.21 | -0.10 | -0.67 |
| 33 | 1 | 0.00  | 0.00  | 0.00 | 0.00  | 0.00  | 0.00  | 0.00  | 0.00  | 0.00  |

88

89

90

A

A

A

|                |           |           |           |
|----------------|-----------|-----------|-----------|
| Frequencies -- | 3298.5533 | 3507.5915 | 3842.8696 |
| Red. masses -- | 1.1085    | 1.0863    | 1.0647    |
| Frc consts --  | 7.1058    | 7.8744    | 9.2635    |
| IR Inten --    | 0.0069    | 813.7683  | 128.5563  |
| Raman Activ -- | 173.9057  | 159.2094  | 123.4045  |
| Depolar (P) -- | 0.1205    | 0.2382    | 0.2482    |
| Depolar (U) -- | 0.2151    | 0.3847    | 0.3977    |

| Atom | AN | X    | Y    | Z     | X     | Y     | Z     | X     | Y     | Z     |
|------|----|------|------|-------|-------|-------|-------|-------|-------|-------|
| 1    | 6  | 0.00 | 0.00 | 0.00  | 0.00  | 0.00  | 0.00  | 0.00  | 0.00  | 0.00  |
| 2    | 6  | 0.00 | 0.00 | 0.00  | 0.00  | 0.00  | 0.00  | 0.00  | 0.00  | 0.00  |
| 3    | 6  | 0.00 | 0.00 | 0.00  | 0.00  | 0.00  | 0.00  | 0.00  | 0.00  | 0.00  |
| 4    | 6  | 0.00 | 0.00 | 0.00  | 0.00  | 0.00  | 0.00  | 0.00  | 0.00  | 0.00  |
| 5    | 6  | 0.00 | 0.00 | 0.00  | 0.00  | 0.00  | 0.00  | 0.00  | 0.00  | 0.00  |
| 6    | 6  | 0.00 | 0.00 | 0.00  | 0.00  | 0.00  | 0.00  | 0.00  | 0.00  | 0.00  |
| 7    | 6  | 0.00 | 0.00 | 0.00  | 0.00  | 0.00  | 0.00  | 0.00  | 0.00  | 0.00  |
| 8    | 1  | 0.00 | 0.00 | 0.00  | 0.00  | 0.00  | 0.00  | 0.00  | 0.00  | 0.00  |
| 9    | 8  | 0.00 | 0.00 | 0.00  | 0.00  | 0.00  | 0.00  | 0.00  | 0.00  | 0.00  |
| 10   | 8  | 0.00 | 0.00 | 0.00  | 0.00  | 0.00  | 0.00  | -0.03 | -0.05 | 0.00  |
| 11   | 6  | 0.00 | 0.00 | 0.00  | 0.00  | 0.00  | 0.00  | 0.00  | 0.00  | 0.00  |
| 12   | 6  | 0.00 | 0.00 | 0.00  | 0.00  | 0.00  | 0.00  | 0.00  | 0.00  | 0.00  |
| 13   | 8  | 0.00 | 0.00 | 0.00  | 0.00  | 0.00  | 0.00  | 0.00  | 0.00  | 0.00  |
| 14   | 8  | 0.00 | 0.00 | 0.00  | 0.00  | 0.00  | 0.00  | 0.00  | 0.00  | 0.00  |
| 15   | 1  | 0.00 | 0.00 | 0.00  | 0.00  | 0.00  | 0.00  | 0.00  | 0.00  | 0.00  |
| 16   | 1  | 0.00 | 0.00 | 0.00  | 0.00  | 0.00  | 0.00  | 0.48  | 0.87  | -0.05 |
| 17   | 1  | 0.00 | 0.00 | 0.00  | 0.00  | 0.00  | 0.00  | 0.00  | 0.00  | 0.00  |
| 18   | 8  | 0.00 | 0.00 | 0.00  | 0.00  | 0.00  | 0.00  | 0.00  | 0.00  | 0.00  |
| 19   | 8  | 0.00 | 0.00 | 0.00  | 0.00  | 0.00  | 0.00  | 0.00  | 0.00  | 0.00  |
| 20   | 1  | 0.00 | 0.00 | 0.00  | 0.00  | 0.00  | 0.00  | -0.01 | 0.02  | 0.00  |
| 21   | 8  | 0.00 | 0.00 | 0.00  | 0.00  | 0.00  | 0.00  | 0.00  | 0.00  | 0.00  |
| 22   | 1  | 0.00 | 0.00 | 0.00  | 0.00  | 0.00  | 0.00  | 0.00  | -0.01 | 0.00  |
| 23   | 7  | 0.00 | 0.00 | 0.00  | -0.06 | 0.01  | 0.04  | 0.00  | 0.00  | 0.00  |
| 24   | 1  | 0.01 | 0.00 | -0.01 | 0.80  | -0.09 | -0.58 | 0.00  | 0.00  | 0.00  |
| 25   | 7  | 0.00 | 0.00 | 0.00  | 0.00  | 0.00  | 0.00  | 0.00  | 0.00  | 0.00  |
| 26   | 1  | 0.01 | 0.00 | 0.00  | 0.05  | 0.00  | 0.00  | 0.00  | 0.00  | 0.00  |

|                |   |           |       |       |           |       |       |           |       |       |
|----------------|---|-----------|-------|-------|-----------|-------|-------|-----------|-------|-------|
| 27             | 6 | 0.00      | 0.00  | 0.02  | 0.00      | 0.00  | 0.00  | 0.00      | 0.00  | 0.00  |
| 28             | 1 | 0.02      | -0.03 | -0.22 | 0.00      | 0.00  | 0.00  | 0.00      | 0.00  | 0.00  |
| 29             | 6 | -0.07     | 0.00  | 0.01  | 0.00      | 0.00  | 0.00  | 0.00      | 0.00  | 0.00  |
| 30             | 1 | 0.69      | -0.01 | -0.07 | 0.00      | 0.00  | 0.00  | 0.00      | 0.00  | 0.00  |
| 31             | 6 | -0.02     | -0.01 | -0.06 | 0.00      | 0.00  | 0.00  | 0.00      | 0.00  | 0.00  |
| 32             | 1 | 0.19      | 0.10  | 0.64  | -0.01     | 0.00  | -0.01 | 0.00      | 0.00  | 0.00  |
| 33             | 1 | 0.00      | 0.00  | 0.00  | 0.00      | 0.00  | 0.00  | 0.01      | 0.02  | 0.01  |
|                |   | 91        |       |       | 92        |       |       | 93        |       |       |
|                |   | A         |       |       | A         |       |       | A         |       |       |
| Frequencies -- |   | 3851.3965 |       |       | 3865.3861 |       |       | 3933.6807 |       |       |
| Red. masses -- |   | 1.0648    |       |       | 1.0464    |       |       | 1.0801    |       |       |
| Frc consts --  |   | 9.3055    |       |       | 9.2117    |       |       | 9.8470    |       |       |
| IR Inten --    |   | 117.8240  |       |       | 82.7927   |       |       | 72.6648   |       |       |
| Raman Activ -- |   | 130.0299  |       |       | 68.8623   |       |       | 22.8479   |       |       |
| Depolar (P) -- |   | 0.2528    |       |       | 0.0790    |       |       | 0.7486    |       |       |
| Depolar (U) -- |   | 0.4035    |       |       | 0.1465    |       |       | 0.8562    |       |       |
| Atom AN        | X | Y         | Z     | X     | Y         | Z     | X     | Y         | Z     |       |
| 1              | 6 | 0.00      | 0.00  | 0.00  | 0.00      | 0.00  | 0.00  | 0.00      | 0.00  | 0.00  |
| 2              | 6 | 0.00      | 0.00  | 0.00  | 0.00      | 0.00  | 0.00  | 0.00      | 0.00  | 0.00  |
| 3              | 6 | 0.00      | 0.00  | 0.00  | 0.00      | 0.00  | 0.00  | 0.00      | 0.00  | 0.00  |
| 4              | 6 | 0.00      | 0.00  | 0.00  | 0.00      | 0.00  | 0.00  | 0.00      | 0.00  | 0.00  |
| 5              | 6 | 0.00      | 0.00  | 0.00  | 0.00      | 0.00  | 0.00  | 0.00      | 0.00  | 0.00  |
| 6              | 6 | 0.00      | 0.00  | 0.00  | 0.00      | 0.00  | 0.00  | 0.00      | 0.00  | 0.00  |
| 7              | 6 | 0.00      | 0.00  | 0.00  | 0.00      | 0.00  | 0.00  | 0.00      | 0.00  | 0.00  |
| 8              | 1 | 0.00      | 0.00  | 0.00  | 0.00      | 0.00  | 0.00  | 0.00      | 0.00  | 0.00  |
| 9              | 8 | 0.00      | 0.00  | 0.00  | 0.00      | 0.00  | 0.00  | 0.00      | 0.00  | 0.00  |
| 10             | 8 | 0.00      | 0.00  | 0.00  | 0.00      | 0.00  | 0.00  | 0.00      | 0.00  | 0.00  |
| 11             | 6 | 0.00      | 0.00  | 0.00  | 0.00      | 0.00  | 0.00  | 0.00      | 0.00  | 0.00  |
| 12             | 6 | 0.00      | 0.00  | 0.00  | 0.00      | 0.00  | 0.00  | 0.00      | 0.00  | 0.00  |
| 13             | 8 | 0.00      | 0.00  | 0.00  | 0.00      | 0.00  | 0.00  | 0.00      | 0.00  | 0.00  |
| 14             | 8 | 0.00      | 0.00  | 0.00  | 0.00      | 0.00  | 0.00  | 0.00      | 0.00  | 0.00  |
| 15             | 1 | 0.00      | 0.00  | 0.00  | 0.00      | 0.00  | 0.00  | 0.00      | 0.00  | 0.00  |
| 16             | 1 | -0.01     | -0.02 | 0.00  | 0.01      | 0.02  | 0.00  | 0.00      | 0.01  | 0.00  |
| 17             | 1 | 0.00      | 0.00  | 0.00  | 0.00      | 0.00  | 0.00  | 0.00      | 0.00  | 0.00  |
| 18             | 8 | 0.00      | 0.00  | 0.00  | 0.00      | 0.00  | 0.00  | 0.00      | 0.00  | 0.00  |
| 19             | 8 | 0.04      | -0.05 | 0.00  | 0.00      | 0.00  | 0.00  | 0.00      | 0.00  | 0.00  |
| 20             | 1 | -0.58     | 0.81  | -0.02 | 0.01      | -0.01 | 0.00  | 0.00      | 0.00  | 0.00  |
| 21             | 8 | 0.00      | 0.00  | 0.00  | 0.03      | -0.01 | 0.04  | 0.00      | 0.07  | 0.02  |
| 22             | 1 | 0.00      | 0.01  | 0.00  | -0.27     | 0.64  | -0.22 | 0.27      | -0.58 | 0.24  |
| 23             | 7 | 0.00      | 0.00  | 0.00  | 0.00      | 0.00  | 0.00  | 0.00      | 0.00  | 0.00  |
| 24             | 1 | 0.00      | 0.00  | 0.00  | 0.00      | 0.00  | 0.00  | 0.00      | 0.00  | 0.00  |
| 25             | 7 | 0.00      | 0.00  | 0.00  | 0.00      | 0.00  | 0.00  | 0.00      | 0.00  | 0.00  |
| 26             | 1 | 0.00      | 0.00  | 0.00  | 0.01      | 0.00  | 0.00  | -0.01     | 0.00  | 0.00  |
| 27             | 6 | 0.00      | 0.00  | 0.00  | 0.00      | 0.00  | 0.00  | 0.00      | 0.00  | 0.00  |
| 28             | 1 | 0.00      | 0.00  | 0.00  | 0.00      | 0.00  | 0.00  | 0.00      | 0.00  | 0.00  |
| 29             | 6 | 0.00      | 0.00  | 0.00  | 0.00      | 0.00  | 0.00  | 0.00      | 0.00  | 0.00  |
| 30             | 1 | 0.00      | 0.00  | 0.00  | 0.00      | 0.00  | 0.00  | 0.00      | 0.00  | 0.00  |
| 31             | 6 | 0.00      | 0.00  | 0.00  | 0.00      | 0.00  | 0.00  | 0.00      | 0.00  | 0.00  |
| 32             | 1 | 0.00      | 0.00  | 0.00  | 0.00      | 0.00  | 0.00  | 0.00      | 0.00  | 0.00  |
| 33             | 1 | 0.00      | -0.01 | 0.00  | -0.16     | -0.49 | -0.45 | -0.19     | -0.49 | -0.50 |

# PYRHEMx2H2O

Harmonic frequencies (cm<sup>-1</sup>), IR intensities (KM/Mole), Raman scattering activities (A<sup>4</sup>/AMU), depolarization ratios for plane and unpolarized incident light, reduced masses (AMU), force constants (mDyne/A), and normal coordinates:

|                |         |  |         |  |         |
|----------------|---------|--|---------|--|---------|
|                | 1       |  | 2       |  | 3       |
|                | A       |  | A       |  | A       |
| Frequencies -- | 15.4329 |  | 26.9787 |  | 40.1672 |

|                |        |        |        |
|----------------|--------|--------|--------|
| Red. masses -- | 6.5240 | 6.5273 | 6.9554 |
| Frc consts --  | 0.0009 | 0.0028 | 0.0066 |
| IR Inten --    | 1.1870 | 1.1282 | 1.2141 |
| Raman Activ -- | 1.4175 | 0.8241 | 1.5354 |
| Depolar (P) -- | 0.7483 | 0.7482 | 0.7346 |
| Depolar (U) -- | 0.8560 | 0.8560 | 0.8470 |

  

| Atom | AN | X     | Y     | Z     | X     | Y     | Z     | X     | Y     | Z     |
|------|----|-------|-------|-------|-------|-------|-------|-------|-------|-------|
| 1    | 8  | -0.17 | 0.10  | 0.00  | -0.03 | -0.05 | 0.14  | 0.05  | -0.01 | -0.02 |
| 2    | 1  | -0.12 | 0.10  | -0.02 | -0.16 | -0.08 | 0.17  | -0.03 | 0.01  | 0.04  |
| 3    | 1  | -0.19 | 0.15  | -0.02 | 0.07  | -0.08 | 0.23  | 0.07  | -0.12 | 0.01  |
| 4    | 6  | -0.04 | 0.02  | 0.02  | 0.03  | 0.01  | -0.07 | 0.01  | 0.02  | 0.03  |
| 5    | 6  | 0.01  | 0.04  | -0.01 | 0.03  | 0.02  | -0.03 | 0.01  | 0.02  | 0.05  |
| 6    | 6  | -0.04 | -0.03 | 0.05  | 0.03  | 0.02  | -0.08 | 0.01  | 0.01  | 0.01  |
| 7    | 6  | -0.09 | 0.05  | 0.01  | 0.03  | 0.01  | -0.07 | 0.01  | 0.01  | 0.00  |
| 8    | 6  | 0.06  | 0.01  | 0.00  | 0.02  | 0.03  | 0.03  | 0.01  | 0.02  | 0.01  |
| 9    | 6  | 0.01  | 0.09  | -0.05 | 0.03  | 0.02  | -0.03 | 0.01  | 0.00  | 0.06  |
| 10   | 6  | 0.01  | -0.06 | 0.06  | 0.03  | 0.03  | -0.03 | 0.01  | 0.01  | -0.01 |
| 11   | 1  | -0.08 | -0.04 | 0.07  | 0.03  | 0.01  | -0.11 | 0.01  | 0.01  | 0.01  |
| 12   | 8  | -0.09 | 0.10  | -0.01 | 0.06  | 0.02  | 0.00  | 0.00  | 0.00  | -0.03 |
| 13   | 8  | -0.12 | 0.03  | 0.04  | 0.00  | 0.01  | -0.16 | 0.02  | 0.02  | 0.01  |
| 14   | 6  | 0.06  | -0.04 | 0.03  | 0.02  | 0.04  | 0.02  | 0.01  | 0.00  | -0.02 |
| 15   | 6  | 0.11  | 0.03  | -0.03 | 0.02  | 0.05  | 0.07  | 0.01  | 0.02  | 0.02  |
| 16   | 8  | 0.01  | 0.11  | -0.06 | 0.02  | 0.05  | -0.05 | -0.01 | -0.11 | 0.11  |
| 17   | 8  | 0.02  | 0.09  | -0.06 | 0.03  | -0.02 | -0.02 | 0.03  | 0.09  | 0.00  |
| 18   | 1  | 0.01  | -0.10 | 0.09  | 0.03  | 0.03  | -0.04 | 0.01  | 0.00  | -0.03 |
| 19   | 1  | -0.14 | 0.05  | 0.03  | 0.00  | 0.01  | -0.08 | 0.02  | 0.01  | -0.01 |
| 20   | 1  | 0.09  | -0.06 | 0.04  | 0.02  | 0.05  | 0.07  | 0.02  | 0.00  | -0.05 |
| 21   | 8  | 0.13  | 0.07  | -0.06 | 0.06  | 0.05  | -0.04 | -0.08 | 0.05  | 0.28  |
| 22   | 8  | 0.15  | 0.01  | -0.03 | -0.03 | 0.05  | 0.26  | 0.13  | -0.01 | -0.32 |
| 23   | 1  | 0.18  | 0.02  | -0.05 | -0.02 | 0.07  | 0.27  | 0.11  | -0.02 | -0.29 |
| 24   | 8  | -0.02 | 0.10  | -0.05 | -0.36 | -0.14 | 0.18  | -0.22 | 0.00  | 0.11  |
| 25   | 1  | 0.01  | 0.10  | -0.07 | -0.21 | -0.13 | 0.16  | -0.14 | 0.00  | 0.12  |
| 26   | 7  | 0.00  | -0.09 | 0.01  | 0.02  | 0.01  | -0.06 | -0.01 | -0.12 | 0.02  |
| 27   | 1  | 0.00  | -0.01 | -0.02 | 0.01  | 0.04  | -0.06 | -0.03 | -0.18 | 0.08  |
| 28   | 7  | 0.01  | -0.05 | -0.01 | 0.03  | -0.02 | -0.05 | 0.03  | 0.07  | -0.07 |
| 29   | 1  | 0.02  | 0.07  | -0.05 | 0.03  | 0.00  | -0.03 | 0.03  | 0.10  | -0.03 |
| 30   | 6  | 0.02  | -0.18 | 0.05  | 0.04  | -0.06 | -0.04 | 0.04  | 0.13  | -0.14 |
| 31   | 1  | 0.02  | -0.18 | 0.04  | 0.05  | -0.09 | -0.03 | 0.08  | 0.27  | -0.22 |
| 32   | 6  | 0.00  | -0.31 | 0.10  | 0.03  | -0.07 | -0.05 | 0.01  | -0.02 | -0.10 |
| 33   | 1  | 0.00  | -0.43 | 0.15  | 0.03  | -0.10 | -0.05 | 0.01  | -0.01 | -0.14 |
| 34   | 6  | 0.00  | -0.24 | 0.08  | 0.01  | -0.02 | -0.06 | -0.03 | -0.18 | 0.00  |
| 35   | 1  | -0.01 | -0.30 | 0.10  | 0.00  | -0.01 | -0.07 | -0.06 | -0.32 | 0.06  |
| 36   | 1  | 0.02  | 0.07  | -0.04 | -0.45 | -0.19 | 0.13  | -0.33 | 0.01  | 0.07  |

|                |         |   |         |   |         |   |  |
|----------------|---------|---|---------|---|---------|---|--|
|                |         | 4 |         | 5 |         | 6 |  |
|                |         | A |         | A |         | A |  |
| Frequencies -- | 43.2738 |   | 55.0453 |   | 63.7116 |   |  |
| Red. masses -- | 5.7647  |   | 5.4946  |   | 5.4305  |   |  |
| Frc consts --  | 0.0064  |   | 0.0098  |   | 0.0130  |   |  |
| IR Inten --    | 1.4757  |   | 2.8424  |   | 2.6869  |   |  |
| Raman Activ -- | 2.4327  |   | 1.5344  |   | 1.8011  |   |  |
| Depolar (P) -- | 0.7394  |   | 0.7446  |   | 0.7216  |   |  |
| Depolar (U) -- | 0.8502  |   | 0.8536  |   | 0.8383  |   |  |

  

| Atom | AN | X    | Y     | Z     | X     | Y     | Z     | X     | Y     | Z     |
|------|----|------|-------|-------|-------|-------|-------|-------|-------|-------|
| 1    | 8  | 0.14 | -0.07 | -0.18 | 0.12  | -0.08 | 0.05  | 0.21  | -0.12 | -0.10 |
| 2    | 1  | 0.05 | -0.04 | -0.11 | 0.12  | -0.08 | 0.06  | 0.16  | -0.07 | -0.04 |
| 3    | 1  | 0.13 | -0.25 | -0.18 | 0.06  | -0.18 | 0.00  | 0.11  | -0.39 | -0.18 |
| 4    | 6  | 0.00 | 0.01  | 0.06  | -0.02 | -0.01 | -0.03 | -0.04 | 0.00  | -0.01 |
| 5    | 6  | 0.00 | 0.00  | 0.00  | -0.01 | -0.01 | -0.06 | -0.02 | 0.02  | -0.01 |
| 6    | 6  | 0.00 | 0.04  | 0.21  | -0.02 | -0.01 | -0.02 | -0.04 | -0.04 | -0.06 |
| 7    | 6  | 0.00 | -0.01 | -0.03 | -0.03 | 0.00  | 0.00  | -0.05 | 0.01  | 0.01  |

|    |   |       |       |       |       |       |       |       |       |       |
|----|---|-------|-------|-------|-------|-------|-------|-------|-------|-------|
| 8  | 6 | 0.00  | 0.01  | 0.03  | 0.00  | -0.01 | -0.04 | 0.01  | 0.00  | -0.01 |
| 9  | 6 | 0.00  | 0.00  | -0.05 | -0.01 | 0.01  | -0.08 | -0.02 | 0.04  | -0.01 |
| 10 | 6 | 0.00  | 0.05  | 0.28  | -0.01 | -0.02 | -0.02 | -0.02 | -0.06 | -0.10 |
| 11 | 1 | 0.01  | 0.05  | 0.26  | -0.03 | -0.01 | 0.00  | -0.06 | -0.05 | -0.07 |
| 12 | 8 | -0.02 | -0.04 | -0.08 | -0.07 | 0.02  | -0.13 | -0.09 | 0.01  | -0.12 |
| 13 | 8 | 0.03  | 0.02  | -0.05 | 0.02  | -0.01 | 0.18  | 0.01  | 0.00  | 0.19  |
| 14 | 6 | 0.00  | 0.03  | 0.17  | 0.00  | -0.01 | -0.02 | 0.01  | -0.04 | -0.06 |
| 15 | 6 | 0.01  | -0.03 | -0.10 | 0.00  | 0.00  | -0.01 | 0.04  | 0.04  | 0.06  |
| 16 | 8 | 0.01  | 0.03  | -0.05 | 0.00  | 0.00  | -0.06 | -0.02 | 0.04  | -0.01 |
| 17 | 8 | -0.01 | -0.01 | -0.03 | -0.02 | 0.06  | -0.09 | -0.01 | 0.06  | -0.03 |
| 18 | 1 | 0.00  | 0.08  | 0.40  | -0.01 | -0.02 | -0.01 | -0.02 | -0.09 | -0.14 |
| 19 | 1 | 0.05  | 0.00  | -0.11 | 0.03  | -0.02 | 0.16  | 0.04  | -0.02 | 0.13  |
| 20 | 1 | 0.00  | 0.04  | 0.20  | 0.00  | -0.01 | 0.00  | 0.03  | -0.06 | -0.08 |
| 21 | 8 | 0.04  | -0.07 | -0.17 | 0.04  | 0.01  | -0.10 | 0.02  | 0.11  | 0.14  |
| 22 | 8 | -0.01 | 0.00  | -0.13 | -0.03 | 0.00  | 0.15  | 0.11  | 0.00  | 0.03  |
| 23 | 1 | -0.01 | -0.03 | -0.22 | -0.02 | 0.02  | 0.16  | 0.13  | 0.03  | 0.08  |
| 24 | 8 | -0.19 | -0.05 | -0.01 | 0.08  | -0.08 | 0.07  | 0.00  | -0.04 | 0.07  |
| 25 | 1 | -0.12 | -0.07 | 0.03  | -0.01 | -0.07 | 0.05  | -0.03 | -0.05 | 0.09  |
| 26 | 7 | 0.02  | 0.05  | 0.02  | 0.01  | -0.09 | 0.05  | -0.03 | 0.15  | -0.08 |
| 27 | 1 | 0.04  | 0.06  | -0.01 | 0.02  | -0.16 | 0.06  | -0.02 | 0.21  | -0.12 |
| 28 | 7 | -0.02 | 0.02  | 0.03  | -0.03 | 0.17  | -0.08 | -0.04 | -0.04 | 0.01  |
| 29 | 1 | -0.01 | 0.00  | -0.01 | -0.01 | 0.12  | -0.11 | -0.01 | 0.02  | -0.01 |
| 30 | 6 | -0.03 | 0.00  | 0.08  | -0.05 | 0.25  | -0.07 | -0.04 | -0.18 | 0.09  |
| 31 | 1 | -0.06 | -0.02 | 0.10  | -0.08 | 0.45  | -0.16 | -0.05 | -0.33 | 0.16  |
| 32 | 6 | 0.00  | 0.02  | 0.11  | -0.02 | 0.03  | 0.07  | -0.04 | -0.07 | 0.04  |
| 33 | 1 | 0.00  | 0.01  | 0.15  | -0.02 | 0.04  | 0.11  | -0.04 | -0.13 | 0.08  |
| 34 | 6 | 0.03  | 0.05  | 0.07  | 0.02  | -0.19 | 0.15  | -0.03 | 0.14  | -0.07 |
| 35 | 1 | 0.07  | 0.07  | 0.07  | 0.05  | -0.39 | 0.26  | -0.02 | 0.27  | -0.13 |
| 36 | 1 | -0.28 | -0.01 | -0.04 | -0.02 | -0.05 | 0.03  | -0.13 | 0.02  | 0.03  |

7

8

9

A

A

A

|                |         |         |         |
|----------------|---------|---------|---------|
| Frequencies -- | 73.8558 | 89.5653 | 91.5869 |
| Red. masses -- | 6.6719  | 6.3756  | 5.9916  |
| Frc consts --  | 0.0214  | 0.0301  | 0.0296  |
| IR Inten --    | 5.5975  | 2.1294  | 0.9515  |
| Raman Activ -- | 0.8225  | 1.6054  | 1.3695  |
| Depolar (P) -- | 0.7380  | 0.7417  | 0.7417  |
| Depolar (U) -- | 0.8492  | 0.8517  | 0.8517  |

| Atom | AN | X     | Y     | Z     | X     | Y     | Z     | X     | Y     | Z     |
|------|----|-------|-------|-------|-------|-------|-------|-------|-------|-------|
| 1    | 8  | -0.09 | -0.05 | 0.26  | -0.07 | 0.18  | 0.02  | -0.07 | 0.08  | 0.04  |
| 2    | 1  | -0.05 | -0.15 | 0.15  | 0.01  | 0.14  | -0.05 | -0.02 | 0.07  | 0.00  |
| 3    | 1  | 0.00  | 0.25  | 0.32  | -0.11 | 0.30  | -0.03 | -0.04 | 0.22  | 0.06  |
| 4    | 6  | -0.01 | 0.01  | -0.08 | 0.04  | 0.00  | 0.01  | 0.04  | -0.04 | 0.01  |
| 5    | 6  | -0.01 | 0.01  | -0.07 | 0.02  | -0.02 | -0.04 | 0.01  | -0.05 | 0.01  |
| 6    | 6  | -0.01 | 0.02  | 0.03  | 0.04  | 0.02  | 0.03  | 0.04  | 0.00  | 0.01  |
| 7    | 6  | -0.01 | 0.00  | -0.15 | 0.02  | 0.02  | 0.03  | 0.04  | -0.04 | 0.01  |
| 8    | 6  | 0.00  | 0.03  | 0.03  | 0.00  | -0.01 | -0.04 | -0.03 | -0.03 | 0.01  |
| 9    | 6  | -0.01 | -0.02 | -0.10 | 0.02  | -0.05 | -0.05 | 0.01  | -0.05 | 0.00  |
| 10   | 6  | -0.01 | 0.04  | 0.15  | 0.02  | 0.03  | 0.00  | 0.00  | 0.02  | 0.01  |
| 11   | 1  | -0.01 | 0.02  | 0.03  | 0.05  | 0.04  | 0.07  | 0.07  | 0.02  | 0.01  |
| 12   | 8  | -0.03 | -0.01 | -0.18 | -0.05 | 0.07  | -0.17 | 0.03  | -0.03 | -0.05 |
| 13   | 8  | 0.00  | 0.00  | -0.14 | 0.05  | -0.02 | 0.29  | 0.06  | -0.05 | 0.07  |
| 14   | 6  | 0.00  | 0.04  | 0.14  | 0.00  | 0.02  | -0.02 | -0.03 | 0.01  | 0.00  |
| 15   | 6  | 0.01  | 0.05  | 0.06  | -0.04 | -0.01 | 0.01  | -0.08 | -0.06 | 0.03  |
| 16   | 8  | -0.02 | -0.09 | -0.07 | 0.02  | -0.13 | -0.01 | 0.01  | -0.07 | 0.02  |
| 17   | 8  | 0.00  | 0.02  | -0.13 | 0.03  | 0.02  | -0.09 | 0.02  | 0.02  | -0.03 |
| 18   | 1  | 0.00  | 0.06  | 0.25  | 0.02  | 0.05  | 0.01  | 0.01  | 0.05  | 0.00  |
| 19   | 1  | 0.01  | -0.01 | -0.06 | 0.02  | 0.02  | 0.20  | 0.04  | -0.03 | 0.04  |
| 20   | 1  | 0.00  | 0.06  | 0.23  | -0.01 | 0.03  | -0.02 | -0.05 | 0.02  | 0.00  |
| 21   | 8  | -0.04 | 0.08  | 0.19  | -0.05 | -0.03 | 0.03  | -0.10 | -0.10 | 0.07  |

|    |   |       |       |       |       |       |       |       |       |       |
|----|---|-------|-------|-------|-------|-------|-------|-------|-------|-------|
| 22 | 8 | 0.08  | 0.02  | -0.09 | -0.07 | 0.01  | 0.06  | -0.12 | -0.03 | -0.01 |
| 23 | 1 | 0.08  | 0.03  | -0.05 | -0.10 | 0.00  | 0.11  | -0.16 | -0.05 | 0.01  |
| 24 | 8 | 0.16  | -0.16 | -0.02 | -0.19 | 0.04  | -0.13 | -0.04 | 0.05  | -0.03 |
| 25 | 1 | 0.06  | -0.13 | -0.08 | -0.05 | 0.04  | -0.14 | -0.01 | 0.05  | -0.04 |
| 26 | 7 | 0.03  | 0.01  | -0.02 | 0.08  | -0.13 | 0.03  | 0.07  | 0.28  | -0.16 |
| 27 | 1 | 0.06  | -0.01 | -0.07 | 0.11  | -0.18 | 0.01  | 0.08  | 0.32  | -0.19 |
| 28 | 7 | -0.05 | -0.05 | 0.00  | 0.03  | -0.20 | 0.06  | 0.05  | 0.27  | -0.15 |
| 29 | 1 | 0.00  | -0.03 | -0.10 | 0.02  | -0.07 | -0.04 | 0.02  | 0.12  | -0.09 |
| 30 | 6 | -0.08 | -0.02 | 0.07  | 0.02  | -0.05 | 0.03  | 0.03  | -0.02 | 0.02  |
| 31 | 1 | -0.15 | -0.06 | 0.10  | -0.02 | -0.07 | 0.05  | 0.01  | -0.08 | 0.05  |
| 32 | 6 | -0.02 | 0.06  | 0.10  | 0.06  | 0.13  | -0.02 | 0.05  | -0.22 | 0.13  |
| 33 | 1 | -0.02 | 0.10  | 0.15  | 0.06  | 0.28  | -0.04 | 0.04  | -0.47 | 0.28  |
| 34 | 6 | 0.06  | 0.07  | 0.03  | 0.10  | 0.07  | -0.02 | 0.07  | -0.02 | 0.02  |
| 35 | 1 | 0.13  | 0.13  | 0.03  | 0.15  | 0.16  | -0.05 | 0.09  | -0.07 | 0.05  |
| 36 | 1 | 0.21  | -0.20 | 0.00  | -0.39 | 0.01  | -0.22 | -0.10 | 0.04  | -0.06 |

10

11

12

A

A

A

|                |          |          |          |
|----------------|----------|----------|----------|
| Frequencies -- | 117.0127 | 120.1911 | 131.3333 |
| Red. masses -- | 6.2585   | 6.9908   | 5.5673   |
| Frc consts --  | 0.0505   | 0.0595   | 0.0566   |
| IR Inten --    | 7.9666   | 5.3090   | 1.7898   |
| Raman Activ -- | 0.4540   | 0.1995   | 0.1267   |
| Depolar (P) -- | 0.7494   | 0.7457   | 0.5928   |
| Depolar (U) -- | 0.8567   | 0.8543   | 0.7443   |

| Atom | AN | X     | Y     | Z     | X     | Y     | Z     | X     | Y     | Z     |
|------|----|-------|-------|-------|-------|-------|-------|-------|-------|-------|
| 1    | 8  | 0.02  | -0.07 | -0.10 | 0.06  | 0.15  | 0.04  | -0.01 | 0.04  | -0.07 |
| 2    | 1  | -0.02 | -0.08 | -0.10 | 0.10  | 0.03  | -0.08 | -0.04 | 0.17  | 0.06  |
| 3    | 1  | -0.08 | -0.29 | -0.18 | 0.08  | 0.37  | 0.05  | 0.00  | -0.13 | -0.04 |
| 4    | 6  | -0.04 | 0.03  | 0.04  | 0.06  | 0.00  | 0.02  | 0.03  | -0.02 | -0.02 |
| 5    | 6  | -0.02 | 0.02  | -0.01 | 0.03  | -0.02 | -0.01 | 0.02  | -0.03 | -0.03 |
| 6    | 6  | -0.04 | 0.02  | 0.04  | 0.06  | 0.01  | 0.01  | 0.03  | -0.01 | 0.01  |
| 7    | 6  | -0.06 | 0.05  | 0.12  | 0.11  | -0.01 | 0.07  | 0.04  | -0.01 | 0.02  |
| 8    | 6  | -0.03 | 0.02  | -0.03 | 0.04  | -0.02 | -0.01 | 0.02  | -0.02 | -0.01 |
| 9    | 6  | -0.01 | -0.01 | -0.05 | 0.01  | -0.03 | -0.01 | 0.01  | -0.01 | -0.04 |
| 10   | 6  | -0.04 | 0.01  | -0.02 | 0.06  | 0.00  | -0.01 | 0.02  | 0.00  | 0.02  |
| 11   | 1  | -0.04 | 0.03  | 0.08  | 0.06  | 0.01  | 0.03  | 0.03  | -0.01 | 0.02  |
| 12   | 8  | 0.00  | 0.07  | 0.27  | 0.13  | -0.04 | 0.12  | 0.07  | 0.00  | 0.11  |
| 13   | 8  | -0.12 | 0.04  | 0.00  | 0.13  | 0.00  | 0.05  | 0.01  | -0.02 | -0.04 |
| 14   | 6  | -0.03 | 0.01  | -0.05 | 0.05  | -0.01 | -0.02 | 0.02  | -0.01 | 0.02  |
| 15   | 6  | -0.04 | 0.04  | 0.04  | 0.08  | 0.01  | 0.02  | 0.01  | -0.02 | 0.00  |
| 16   | 8  | -0.03 | 0.05  | -0.10 | -0.01 | 0.00  | -0.05 | 0.01  | -0.06 | -0.02 |
| 17   | 8  | 0.02  | -0.12 | -0.02 | 0.00  | -0.10 | 0.01  | 0.00  | 0.05  | -0.07 |
| 18   | 1  | -0.04 | 0.00  | -0.04 | 0.06  | 0.01  | -0.02 | 0.02  | 0.00  | 0.05  |
| 19   | 1  | -0.12 | 0.04  | 0.03  | 0.13  | 0.01  | 0.03  | 0.00  | -0.01 | -0.03 |
| 20   | 1  | -0.02 | 0.00  | -0.07 | 0.04  | -0.01 | -0.03 | 0.01  | 0.00  | 0.04  |
| 21   | 8  | -0.07 | 0.08  | 0.13  | 0.08  | 0.06  | 0.04  | 0.00  | -0.03 | 0.01  |
| 22   | 8  | 0.00  | 0.02  | 0.01  | 0.14  | -0.03 | 0.02  | 0.00  | -0.02 | 0.02  |
| 23   | 1  | -0.01 | 0.04  | 0.07  | 0.17  | 0.00  | 0.04  | -0.01 | -0.02 | 0.04  |
| 24   | 8  | -0.04 | -0.16 | -0.15 | -0.11 | -0.10 | -0.24 | 0.04  | 0.23  | 0.26  |
| 25   | 1  | -0.01 | -0.17 | -0.13 | -0.03 | -0.11 | -0.22 | 0.05  | 0.26  | 0.19  |
| 26   | 7  | 0.17  | -0.05 | -0.08 | -0.18 | 0.03  | -0.03 | 0.03  | -0.09 | -0.15 |
| 27   | 1  | 0.23  | -0.08 | -0.16 | -0.17 | 0.03  | -0.05 | 0.10  | -0.14 | -0.23 |
| 28   | 7  | 0.05  | -0.02 | -0.11 | -0.21 | 0.06  | -0.06 | -0.14 | -0.12 | -0.16 |
| 29   | 1  | 0.01  | -0.10 | -0.09 | 0.03  | -0.05 | -0.01 | 0.01  | 0.00  | -0.12 |
| 30   | 6  | 0.00  | 0.04  | -0.01 | -0.23 | 0.05  | 0.00  | -0.22 | -0.02 | -0.01 |
| 31   | 1  | -0.11 | 0.07  | 0.00  | -0.26 | 0.07  | -0.01 | -0.38 | -0.02 | 0.02  |
| 32   | 6  | 0.10  | 0.04  | 0.10  | -0.20 | 0.00  | 0.05  | -0.07 | 0.07  | 0.10  |
| 33   | 1  | 0.09  | 0.08  | 0.20  | -0.21 | -0.03 | 0.10  | -0.08 | 0.16  | 0.23  |
| 34   | 6  | 0.22  | -0.02 | 0.04  | -0.17 | -0.02 | 0.03  | 0.09  | 0.02  | 0.00  |
| 35   | 1  | 0.33  | -0.04 | 0.09  | -0.14 | -0.05 | 0.06  | 0.25  | 0.05  | 0.03  |

|                |   |          |       |       |       |          |       |       |          |       |
|----------------|---|----------|-------|-------|-------|----------|-------|-------|----------|-------|
| 36             | 1 | 0.24     | -0.20 | -0.04 | -0.09 | -0.11    | -0.23 | -0.19 | 0.20     | 0.16  |
|                |   | 13       |       |       | 14    |          |       | 15    |          |       |
|                |   | A        |       |       | A     |          |       | A     |          |       |
| Frequencies -- |   | 153.2835 |       |       |       | 165.0599 |       |       | 173.8999 |       |
| Red. masses -- |   | 7.3987   |       |       |       | 4.9749   |       |       | 5.4792   |       |
| Frc consts --  |   | 0.1024   |       |       |       | 0.0799   |       |       | 0.0976   |       |
| IR Inten --    |   | 8.6795   |       |       |       | 5.8052   |       |       | 1.5273   |       |
| Raman Activ -- |   | 0.3733   |       |       |       | 0.1210   |       |       | 2.5698   |       |
| Depolar (P) -- |   | 0.5922   |       |       |       | 0.7179   |       |       | 0.6983   |       |
| Depolar (U) -- |   | 0.7439   |       |       |       | 0.8358   |       |       | 0.8223   |       |
| Atom AN        |   | X        | Y     | Z     | X     | Y        | Z     | X     | Y        | Z     |
| 1              | 8 | 0.00     | -0.04 | 0.05  | -0.11 | -0.14    | -0.08 | 0.06  | 0.01     | 0.05  |
| 2              | 1 | 0.01     | -0.14 | -0.04 | -0.15 | -0.06    | 0.01  | 0.00  | -0.04    | 0.04  |
| 3              | 1 | 0.01     | 0.10  | 0.05  | -0.24 | -0.50    | -0.17 | 0.16  | 0.13     | 0.15  |
| 4              | 6 | 0.00     | 0.03  | 0.07  | 0.10  | 0.02     | 0.00  | -0.02 | 0.04     | 0.17  |
| 5              | 6 | 0.02     | 0.06  | 0.20  | 0.10  | 0.01     | -0.02 | -0.01 | 0.01     | 0.01  |
| 6              | 6 | 0.00     | -0.01 | -0.08 | 0.10  | 0.03     | 0.00  | -0.02 | 0.04     | 0.26  |
| 7              | 6 | -0.03    | 0.03  | -0.04 | 0.01  | 0.08     | 0.02  | -0.03 | 0.02     | 0.03  |
| 8              | 6 | 0.03     | 0.04  | 0.15  | 0.08  | 0.02     | -0.02 | 0.00  | -0.03    | -0.16 |
| 9              | 6 | 0.02     | 0.07  | 0.22  | 0.08  | -0.02    | -0.01 | -0.01 | -0.01    | 0.02  |
| 10             | 6 | 0.01     | -0.02 | -0.10 | 0.09  | 0.04     | 0.00  | -0.01 | -0.02    | 0.00  |
| 11             | 1 | -0.01    | -0.04 | -0.21 | 0.12  | 0.04     | 0.02  | -0.03 | 0.07     | 0.45  |
| 12             | 8 | -0.08    | 0.03  | -0.17 | 0.02  | 0.21     | 0.03  | -0.04 | -0.06    | 0.00  |
| 13             | 8 | -0.03    | 0.03  | -0.03 | -0.12 | 0.00     | 0.03  | -0.01 | 0.08     | -0.15 |
| 14             | 6 | 0.03     | 0.01  | 0.02  | 0.08  | 0.04     | -0.01 | 0.00  | -0.07    | -0.26 |
| 15             | 6 | 0.02     | 0.00  | 0.00  | 0.01  | -0.02    | 0.00  | 0.01  | 0.00     | -0.06 |
| 16             | 8 | 0.02     | 0.07  | 0.22  | 0.06  | -0.14    | 0.04  | -0.01 | -0.18    | 0.12  |
| 17             | 8 | 0.06     | 0.07  | 0.20  | 0.09  | 0.09     | -0.08 | 0.01  | 0.15     | -0.06 |
| 18             | 1 | 0.01     | -0.06 | -0.24 | 0.09  | 0.05     | 0.01  | -0.01 | -0.03    | -0.01 |
| 19             | 1 | -0.03    | 0.03  | -0.05 | -0.17 | 0.05     | 0.08  | 0.02  | 0.04     | -0.17 |
| 20             | 1 | 0.03     | 0.00  | -0.03 | 0.07  | 0.05     | 0.00  | 0.01  | -0.12    | -0.46 |
| 21             | 8 | 0.06     | -0.10 | -0.12 | -0.01 | -0.12    | 0.03  | 0.01  | 0.07     | -0.05 |
| 22             | 8 | -0.04    | 0.05  | -0.05 | -0.09 | 0.04     | 0.00  | 0.02  | -0.03    | 0.11  |
| 23             | 1 | -0.04    | -0.01 | -0.19 | -0.16 | 0.00     | 0.03  | 0.04  | 0.02     | 0.21  |
| 24             | 8 | 0.00     | -0.12 | -0.12 | 0.01  | -0.09    | -0.01 | -0.01 | -0.02    | -0.03 |
| 25             | 1 | -0.01    | -0.16 | -0.03 | -0.02 | -0.09    | -0.01 | -0.05 | -0.03    | -0.02 |
| 26             | 7 | 0.07     | -0.07 | -0.16 | -0.10 | 0.04     | 0.03  | 0.01  | 0.02     | -0.02 |
| 27             | 1 | 0.13     | -0.11 | -0.22 | -0.12 | 0.03     | 0.06  | 0.01  | -0.02    | 0.00  |
| 28             | 7 | -0.09    | -0.08 | -0.18 | -0.06 | 0.02     | 0.04  | 0.00  | -0.01    | -0.01 |
| 29             | 1 | 0.06     | 0.02  | 0.05  | 0.12  | 0.07     | -0.04 | 0.00  | 0.10     | -0.05 |
| 30             | 6 | -0.16    | -0.01 | -0.03 | -0.05 | -0.01    | 0.02  | 0.00  | -0.02    | 0.01  |
| 31             | 1 | -0.29    | 0.00  | -0.02 | -0.02 | -0.03    | 0.03  | -0.01 | -0.04    | 0.02  |
| 32             | 6 | -0.03    | 0.03  | 0.08  | -0.08 | -0.01    | -0.01 | 0.00  | -0.01    | 0.01  |
| 33             | 1 | -0.04    | 0.09  | 0.20  | -0.08 | -0.04    | -0.03 | 0.00  | -0.01    | 0.02  |
| 34             | 6 | 0.12     | -0.01 | -0.01 | -0.12 | 0.02     | 0.00  | 0.01  | 0.02     | -0.01 |
| 35             | 1 | 0.26     | 0.00  | 0.03  | -0.15 | 0.03     | -0.01 | 0.02  | 0.03     | -0.01 |
| 36             | 1 | 0.02     | -0.03 | -0.09 | 0.35  | -0.14    | 0.12  | 0.19  | -0.02    | 0.05  |
|                |   | 16       |       |       | 17    |          |       | 18    |          |       |
|                |   | A        |       |       | A     |          |       | A     |          |       |
| Frequencies -- |   | 188.1315 |       |       |       | 195.6819 |       |       | 203.0733 |       |
| Red. masses -- |   | 7.3469   |       |       |       | 7.3975   |       |       | 1.2346   |       |
| Frc consts --  |   | 0.1532   |       |       |       | 0.1669   |       |       | 0.0300   |       |
| IR Inten --    |   | 1.5941   |       |       |       | 5.3482   |       |       | 80.6503  |       |
| Raman Activ -- |   | 0.4845   |       |       |       | 0.8121   |       |       | 0.5097   |       |
| Depolar (P) -- |   | 0.7453   |       |       |       | 0.4645   |       |       | 0.7038   |       |
| Depolar (U) -- |   | 0.8541   |       |       |       | 0.6344   |       |       | 0.8262   |       |
| Atom AN        |   | X        | Y     | Z     | X     | Y        | Z     | X     | Y        | Z     |
| 1              | 8 | -0.09    | -0.03 | -0.04 | -0.23 | -0.14    | -0.10 | -0.01 | -0.04    | 0.00  |
| 2              | 1 | -0.03    | -0.04 | -0.07 | -0.12 | -0.05    | -0.07 | 0.08  | -0.12    | -0.11 |
| 3              | 1 | -0.07    | 0.10  | -0.03 | -0.31 | -0.18    | -0.17 | -0.04 | 0.16     | -0.04 |



|    |   |       |       |       |       |       |       |       |       |       |
|----|---|-------|-------|-------|-------|-------|-------|-------|-------|-------|
| 4  | 6 | 0.07  | 0.00  | 0.10  | 0.05  | 0.01  | -0.03 | 0.00  | 0.01  | 0.02  |
| 5  | 6 | 0.06  | -0.02 | -0.01 | -0.02 | -0.01 | -0.06 | 0.00  | 0.01  | 0.02  |
| 6  | 6 | 0.07  | 0.04  | 0.22  | 0.05  | 0.10  | 0.05  | 0.00  | 0.00  | 0.00  |
| 7  | 6 | 0.02  | 0.00  | -0.03 | 0.05  | -0.01 | -0.02 | -0.01 | 0.01  | 0.01  |
| 8  | 6 | 0.05  | -0.04 | -0.13 | -0.08 | 0.03  | -0.09 | 0.01  | 0.01  | 0.02  |
| 9  | 6 | 0.06  | 0.07  | 0.00  | -0.01 | -0.13 | 0.08  | 0.00  | 0.00  | 0.00  |
| 10 | 6 | 0.06  | 0.01  | 0.03  | -0.01 | 0.14  | 0.05  | 0.00  | 0.00  | -0.02 |
| 11 | 1 | 0.09  | 0.07  | 0.39  | 0.11  | 0.14  | 0.12  | -0.01 | 0.00  | -0.01 |
| 12 | 8 | -0.03 | 0.01  | -0.19 | 0.03  | 0.02  | -0.09 | 0.00  | 0.00  | 0.04  |
| 13 | 8 | 0.01  | -0.01 | -0.04 | 0.03  | -0.05 | 0.10  | -0.02 | 0.01  | -0.02 |
| 14 | 6 | 0.05  | -0.04 | -0.20 | -0.07 | 0.08  | -0.05 | 0.01  | 0.00  | 0.00  |
| 15 | 6 | -0.04 | -0.05 | 0.02  | 0.01  | 0.10  | -0.07 | 0.00  | 0.00  | 0.00  |
| 16 | 8 | 0.10  | 0.34  | -0.13 | 0.05  | -0.14 | 0.13  | -0.03 | -0.02 | -0.01 |
| 17 | 8 | 0.01  | -0.13 | 0.12  | -0.08 | -0.20 | 0.16  | 0.03  | 0.02  | -0.03 |
| 18 | 1 | 0.06  | 0.02  | 0.05  | -0.01 | 0.22  | 0.12  | 0.00  | -0.01 | -0.04 |
| 19 | 1 | -0.01 | 0.01  | -0.08 | 0.00  | -0.01 | 0.11  | -0.01 | 0.01  | -0.02 |
| 20 | 1 | 0.05  | -0.06 | -0.36 | -0.11 | 0.10  | -0.06 | 0.01  | 0.00  | -0.01 |
| 21 | 8 | -0.11 | -0.07 | 0.20  | 0.04  | 0.27  | -0.11 | 0.01  | -0.01 | -0.01 |
| 22 | 8 | -0.08 | -0.03 | 0.03  | 0.14  | 0.00  | 0.02  | -0.01 | 0.01  | 0.00  |
| 23 | 1 | -0.17 | -0.03 | 0.19  | 0.25  | 0.08  | 0.04  | -0.01 | 0.00  | -0.02 |
| 24 | 8 | 0.05  | -0.01 | 0.07  | 0.05  | -0.01 | 0.07  | 0.06  | -0.02 | 0.00  |
| 25 | 1 | 0.07  | -0.02 | 0.10  | 0.06  | -0.01 | 0.06  | 0.13  | 0.02  | -0.09 |
| 26 | 7 | -0.03 | -0.05 | 0.01  | 0.02  | 0.02  | -0.05 | 0.00  | 0.01  | 0.01  |
| 27 | 1 | -0.04 | 0.02  | -0.02 | 0.02  | -0.01 | -0.04 | -0.01 | 0.01  | 0.02  |
| 28 | 7 | -0.04 | -0.02 | -0.01 | 0.00  | 0.03  | -0.05 | 0.01  | 0.01  | 0.01  |
| 29 | 1 | 0.03  | -0.07 | 0.09  | -0.09 | -0.16 | 0.14  | 0.03  | 0.00  | -0.02 |
| 30 | 6 | -0.04 | 0.02  | -0.02 | -0.01 | 0.00  | -0.02 | 0.01  | 0.00  | 0.01  |
| 31 | 1 | -0.04 | 0.04  | -0.03 | -0.03 | 0.01  | -0.02 | 0.01  | 0.00  | 0.01  |
| 32 | 6 | -0.04 | 0.02  | -0.02 | 0.01  | -0.03 | 0.01  | 0.00  | 0.00  | 0.00  |
| 33 | 1 | -0.04 | 0.04  | -0.02 | 0.00  | -0.05 | 0.04  | 0.00  | -0.01 | -0.01 |
| 34 | 6 | -0.03 | -0.02 | 0.00  | 0.02  | -0.02 | -0.01 | -0.01 | 0.00  | 0.00  |
| 35 | 1 | -0.03 | -0.03 | 0.01  | 0.04  | -0.04 | 0.01  | -0.02 | 0.00  | 0.00  |
| 36 | 1 | -0.29 | 0.07  | -0.06 | -0.28 | 0.01  | -0.05 | -0.87 | 0.01  | -0.37 |

|                |   |          |       |       |          |       |       |          |       |       |
|----------------|---|----------|-------|-------|----------|-------|-------|----------|-------|-------|
|                |   | 19       |       |       | 20       |       |       | 21       |       |       |
|                |   | A        |       |       | A        |       |       | A        |       |       |
| Frequencies -- |   | 216.1443 |       |       | 227.5314 |       |       | 254.3365 |       |       |
| Red. masses -- |   | 8.9547   |       |       | 6.0887   |       |       | 6.3695   |       |       |
| Frc consts --  |   | 0.2465   |       |       | 0.1857   |       |       | 0.2428   |       |       |
| IR Inten --    |   | 11.6216  |       |       | 41.0244  |       |       | 22.8625  |       |       |
| Raman Activ -- |   | 0.2233   |       |       | 1.3401   |       |       | 0.2209   |       |       |
| Depolar (P) -- |   | 0.6033   |       |       | 0.7467   |       |       | 0.6206   |       |       |
| Depolar (U) -- |   | 0.7525   |       |       | 0.8550   |       |       | 0.7659   |       |       |
| Atom AN        | X | Y        | Z     | X     | Y        | Z     | X     | Y        | Z     |       |
| 1              | 8 | 0.20     | 0.34  | -0.05 | 0.14     | -0.05 | 0.11  | -0.09    | 0.24  | -0.20 |
| 2              | 1 | 0.11     | 0.31  | -0.06 | 0.17     | -0.17 | -0.01 | 0.03     | 0.28  | -0.22 |
| 3              | 1 | 0.16     | 0.18  | -0.07 | 0.06     | 0.01  | 0.03  | -0.10    | 0.36  | -0.22 |
| 4              | 6 | 0.01     | 0.03  | -0.01 | -0.03    | -0.03 | -0.20 | -0.03    | -0.03 | -0.06 |
| 5              | 6 | 0.01     | 0.01  | -0.02 | 0.01     | -0.02 | -0.22 | -0.01    | -0.01 | -0.05 |
| 6              | 6 | 0.00     | -0.04 | -0.01 | -0.03    | -0.04 | -0.02 | -0.03    | -0.01 | -0.03 |
| 7              | 6 | -0.10    | 0.11  | -0.06 | -0.05    | 0.03  | -0.04 | 0.02     | -0.05 | 0.01  |
| 8              | 6 | 0.03     | -0.01 | 0.00  | 0.04     | -0.03 | -0.17 | -0.01    | -0.01 | -0.05 |
| 9              | 6 | 0.00     | -0.15 | 0.02  | 0.02     | 0.04  | 0.02  | 0.00     | 0.09  | 0.01  |
| 10             | 6 | 0.02     | -0.05 | 0.00  | 0.00     | -0.03 | 0.16  | -0.02    | 0.00  | 0.05  |
| 11             | 1 | -0.04    | -0.06 | -0.02 | -0.06    | -0.04 | 0.05  | -0.02    | -0.01 | -0.02 |
| 12             | 8 | -0.12    | 0.24  | -0.10 | 0.00     | 0.09  | 0.10  | 0.04     | -0.08 | 0.06  |
| 13             | 8 | -0.20    | 0.10  | -0.10 | -0.07    | 0.01  | 0.00  | 0.05     | -0.05 | 0.04  |
| 14             | 6 | 0.03     | -0.04 | 0.01  | 0.04     | -0.03 | 0.05  | -0.01    | 0.00  | 0.02  |
| 15             | 6 | 0.04     | -0.02 | 0.01  | 0.00     | -0.02 | -0.05 | -0.02    | 0.00  | -0.02 |
| 16             | 8 | -0.04    | -0.17 | 0.00  | 0.23     | 0.02  | 0.16  | 0.09     | 0.06  | 0.09  |
| 17             | 8 | 0.00     | -0.32 | 0.09  | -0.16    | 0.06  | 0.13  | -0.05    | 0.20  | -0.01 |

|    |   |       |       |       |       |       |       |       |       |       |
|----|---|-------|-------|-------|-------|-------|-------|-------|-------|-------|
| 18 | 1 | 0.02  | -0.07 | -0.01 | 0.00  | -0.01 | 0.40  | -0.02 | 0.01  | 0.12  |
| 19 | 1 | -0.25 | 0.11  | -0.18 | -0.06 | -0.01 | 0.09  | 0.01  | -0.02 | -0.05 |
| 20 | 1 | 0.05  | -0.04 | 0.02  | 0.06  | -0.02 | 0.18  | -0.01 | 0.01  | 0.07  |
| 21 | 8 | 0.03  | -0.05 | 0.01  | -0.04 | -0.02 | 0.05  | -0.03 | 0.02  | 0.00  |
| 22 | 8 | 0.02  | -0.01 | 0.01  | -0.04 | -0.01 | 0.03  | -0.02 | -0.01 | 0.00  |
| 23 | 1 | 0.01  | -0.01 | 0.02  | -0.10 | 0.00  | 0.17  | -0.02 | 0.00  | 0.04  |
| 24 | 8 | 0.07  | -0.09 | 0.16  | -0.01 | 0.06  | -0.12 | 0.09  | -0.34 | 0.15  |
| 25 | 1 | 0.10  | -0.05 | 0.10  | -0.08 | 0.05  | -0.09 | -0.04 | -0.30 | 0.06  |
| 26 | 7 | -0.01 | 0.04  | 0.00  | 0.01  | -0.01 | -0.04 | 0.00  | -0.01 | -0.01 |
| 27 | 1 | -0.01 | 0.01  | 0.02  | 0.01  | -0.02 | -0.02 | 0.00  | 0.00  | 0.00  |
| 28 | 7 | 0.01  | 0.05  | 0.00  | -0.01 | -0.01 | -0.04 | 0.00  | -0.02 | 0.00  |
| 29 | 1 | 0.01  | -0.25 | 0.08  | -0.17 | 0.05  | 0.17  | -0.06 | 0.17  | 0.01  |
| 30 | 6 | 0.01  | 0.02  | 0.00  | -0.01 | -0.02 | -0.04 | 0.00  | -0.01 | -0.01 |
| 31 | 1 | 0.02  | 0.02  | 0.00  | -0.01 | -0.02 | -0.04 | 0.00  | -0.02 | -0.01 |
| 32 | 6 | 0.00  | -0.03 | 0.01  | 0.00  | -0.02 | -0.03 | 0.00  | 0.00  | -0.02 |
| 33 | 1 | 0.00  | -0.06 | 0.01  | 0.00  | -0.03 | -0.02 | 0.00  | 0.01  | -0.02 |
| 34 | 6 | -0.01 | -0.01 | 0.01  | 0.00  | -0.02 | -0.03 | 0.00  | 0.00  | -0.02 |
| 35 | 1 | -0.03 | -0.03 | 0.02  | 0.00  | -0.02 | -0.03 | 0.00  | 0.01  | -0.02 |
| 36 | 1 | -0.18 | -0.15 | 0.05  | -0.35 | 0.18  | -0.24 | -0.05 | -0.39 | 0.09  |

22 23 24  
A A A

Frequencies -- 286.4211 297.6712 321.8827  
Red. masses -- 6.3761 1.0819 9.1047  
Frc consts -- 0.3082 0.0565 0.5558  
IR Inten -- 42.5755 70.1604 7.5258  
Raman Activ -- 1.0560 0.3744 2.7218  
Depolar (P) -- 0.7003 0.5035 0.7377  
Depolar (U) -- 0.8237 0.6697 0.8491

| Atom | AN | X     | Y     | Z     | X     | Y     | Z     | X     | Y     | Z     |
|------|----|-------|-------|-------|-------|-------|-------|-------|-------|-------|
| 1    | 8  | 0.10  | 0.05  | 0.05  | 0.00  | -0.03 | -0.01 | 0.11  | 0.07  | 0.05  |
| 2    | 1  | -0.04 | 0.05  | 0.11  | 0.21  | -0.24 | -0.28 | 0.11  | -0.05 | -0.06 |
| 3    | 1  | 0.03  | -0.32 | 0.02  | -0.04 | 0.50  | -0.09 | 0.08  | 0.16  | 0.01  |
| 4    | 6  | 0.12  | -0.07 | 0.04  | 0.01  | 0.00  | 0.01  | 0.01  | -0.14 | 0.03  |
| 5    | 6  | -0.03 | -0.14 | 0.10  | 0.00  | -0.01 | 0.00  | 0.13  | -0.05 | 0.04  |
| 6    | 6  | 0.12  | 0.03  | -0.02 | 0.01  | 0.01  | -0.01 | 0.01  | -0.08 | 0.00  |
| 7    | 6  | 0.07  | -0.02 | -0.02 | 0.01  | 0.01  | 0.01  | -0.10 | -0.16 | 0.03  |
| 8    | 6  | -0.15 | -0.11 | 0.05  | -0.01 | -0.01 | 0.01  | -0.05 | 0.07  | 0.00  |
| 9    | 6  | -0.03 | -0.03 | 0.06  | -0.01 | -0.01 | -0.01 | 0.23  | -0.04 | 0.03  |
| 10   | 6  | 0.00  | 0.12  | -0.01 | 0.01  | 0.01  | -0.01 | -0.08 | 0.00  | 0.01  |
| 11   | 1  | 0.21  | 0.07  | -0.06 | 0.02  | 0.01  | -0.01 | 0.11  | -0.04 | -0.03 |
| 12   | 8  | 0.06  | 0.21  | -0.03 | 0.00  | 0.03  | 0.01  | -0.10 | -0.14 | 0.03  |
| 13   | 8  | -0.11 | -0.10 | -0.06 | -0.02 | 0.00  | 0.00  | -0.19 | -0.20 | 0.00  |
| 14   | 6  | -0.14 | 0.03  | 0.02  | -0.01 | 0.01  | 0.01  | -0.05 | 0.04  | 0.02  |
| 15   | 6  | -0.10 | -0.11 | 0.01  | 0.00  | -0.01 | 0.00  | -0.11 | 0.14  | -0.03 |
| 16   | 8  | -0.02 | 0.12  | -0.02 | -0.01 | -0.01 | -0.01 | 0.24  | 0.01  | -0.02 |
| 17   | 8  | -0.01 | 0.15  | -0.04 | -0.01 | 0.00  | -0.01 | 0.30  | -0.03 | -0.04 |
| 18   | 1  | 0.00  | 0.25  | -0.04 | 0.01  | 0.02  | -0.02 | -0.08 | 0.04  | 0.00  |
| 19   | 1  | -0.21 | -0.03 | -0.05 | -0.02 | 0.00  | -0.02 | -0.27 | -0.17 | -0.07 |
| 20   | 1  | -0.25 | 0.08  | -0.01 | -0.02 | 0.01  | 0.01  | 0.00  | 0.01  | 0.03  |
| 21   | 8  | -0.06 | 0.09  | -0.05 | 0.00  | 0.00  | 0.00  | -0.09 | 0.26  | -0.07 |
| 22   | 8  | 0.11  | -0.27 | 0.03  | 0.01  | -0.02 | 0.00  | -0.09 | 0.14  | -0.05 |
| 23   | 1  | 0.30  | -0.16 | -0.01 | 0.03  | -0.01 | 0.00  | -0.10 | 0.12  | -0.10 |
| 24   | 8  | 0.02  | 0.00  | -0.04 | -0.01 | -0.01 | 0.01  | -0.02 | 0.04  | -0.01 |
| 25   | 1  | 0.04  | 0.06  | -0.17 | -0.24 | -0.20 | 0.40  | 0.06  | -0.03 | 0.14  |
| 26   | 7  | 0.01  | -0.02 | 0.01  | 0.00  | 0.00  | 0.00  | -0.05 | 0.00  | 0.01  |
| 27   | 1  | 0.01  | 0.02  | -0.01 | 0.00  | 0.00  | 0.00  | -0.07 | 0.02  | 0.02  |
| 28   | 7  | 0.01  | -0.02 | 0.01  | 0.00  | 0.00  | 0.00  | -0.03 | 0.00  | 0.00  |
| 29   | 1  | -0.01 | 0.16  | -0.05 | -0.01 | 0.03  | -0.02 | 0.35  | -0.01 | -0.09 |
| 30   | 6  | 0.01  | -0.01 | 0.00  | 0.00  | 0.00  | 0.00  | -0.04 | 0.01  | 0.01  |
| 31   | 1  | 0.01  | -0.01 | 0.00  | 0.00  | 0.00  | 0.00  | -0.04 | 0.01  | 0.01  |

|    |   |       |       |       |      |      |      |       |      |      |
|----|---|-------|-------|-------|------|------|------|-------|------|------|
| 32 | 6 | 0.01  | 0.01  | -0.01 | 0.00 | 0.00 | 0.00 | -0.05 | 0.01 | 0.01 |
| 33 | 1 | 0.01  | 0.02  | -0.02 | 0.00 | 0.00 | 0.00 | -0.05 | 0.00 | 0.00 |
| 34 | 6 | 0.01  | 0.00  | 0.00  | 0.00 | 0.00 | 0.00 | -0.06 | 0.00 | 0.01 |
| 35 | 1 | 0.00  | 0.01  | -0.01 | 0.00 | 0.00 | 0.00 | -0.06 | 0.01 | 0.01 |
| 36 | 1 | -0.17 | -0.13 | -0.13 | 0.10 | 0.52 | 0.12 | 0.04  | 0.17 | 0.04 |

25

26

27

A

A

A

|                |          |          |          |
|----------------|----------|----------|----------|
| Frequencies -- | 375.5475 | 380.7118 | 406.1245 |
| Red. masses -- | 5.9273   | 4.8319   | 5.4645   |
| Frc consts --  | 0.4925   | 0.4126   | 0.5310   |
| IR Inten --    | 32.3658  | 61.6855  | 1.3217   |
| Raman Activ -- | 0.1158   | 3.3113   | 2.8732   |
| Depolar (P) -- | 0.5897   | 0.1240   | 0.7457   |
| Depolar (U) -- | 0.7419   | 0.2207   | 0.8543   |

| Atom | AN | X     | Y     | Z     | X     | Y     | Z     | X     | Y     | Z     |
|------|----|-------|-------|-------|-------|-------|-------|-------|-------|-------|
| 1    | 8  | 0.01  | 0.00  | 0.00  | -0.05 | -0.07 | -0.05 | 0.03  | 0.07  | 0.05  |
| 2    | 1  | -0.05 | 0.02  | 0.04  | -0.03 | -0.03 | -0.01 | 0.02  | 0.04  | 0.02  |
| 3    | 1  | 0.12  | 0.05  | 0.10  | 0.23  | 0.38  | 0.18  | -0.24 | -0.38 | -0.18 |
| 4    | 6  | 0.02  | 0.01  | 0.17  | -0.04 | 0.06  | 0.06  | -0.07 | 0.01  | -0.08 |
| 5    | 6  | 0.01  | -0.06 | -0.09 | 0.02  | 0.02  | -0.02 | 0.00  | 0.06  | -0.03 |
| 6    | 6  | 0.04  | 0.08  | 0.09  | -0.05 | 0.01  | -0.12 | -0.04 | 0.22  | -0.05 |
| 7    | 6  | -0.04 | -0.01 | 0.09  | -0.08 | 0.11  | 0.06  | -0.09 | -0.09 | -0.02 |
| 8    | 6  | -0.02 | 0.03  | 0.19  | -0.02 | -0.02 | -0.08 | 0.06  | 0.02  | -0.05 |
| 9    | 6  | 0.01  | -0.07 | -0.16 | 0.10  | 0.01  | -0.01 | 0.01  | 0.08  | 0.01  |
| 10   | 6  | 0.00  | 0.05  | -0.23 | -0.05 | 0.03  | -0.01 | 0.00  | 0.24  | 0.00  |
| 11   | 1  | 0.11  | 0.13  | 0.14  | -0.06 | -0.01 | -0.25 | 0.06  | 0.27  | -0.01 |
| 12   | 8  | -0.08 | -0.06 | 0.00  | -0.10 | -0.05 | 0.00  | -0.08 | -0.18 | 0.03  |
| 13   | 8  | -0.05 | 0.02  | -0.02 | 0.08  | 0.22  | 0.00  | -0.11 | -0.10 | 0.02  |
| 14   | 6  | -0.03 | 0.09  | 0.07  | -0.03 | 0.06  | 0.10  | 0.04  | 0.21  | -0.09 |
| 15   | 6  | 0.03  | 0.01  | 0.11  | -0.07 | -0.09 | -0.05 | 0.08  | -0.07 | 0.01  |
| 16   | 8  | 0.28  | -0.02 | -0.02 | 0.13  | 0.00  | 0.01  | -0.06 | -0.02 | 0.02  |
| 17   | 8  | -0.25 | 0.00  | -0.04 | 0.15  | -0.04 | -0.01 | 0.07  | -0.02 | 0.02  |
| 18   | 1  | 0.00  | 0.02  | -0.55 | -0.05 | 0.02  | 0.00  | 0.00  | 0.19  | 0.10  |
| 19   | 1  | -0.05 | 0.01  | -0.10 | 0.22  | 0.12  | -0.08 | -0.17 | -0.07 | 0.12  |
| 20   | 1  | -0.08 | 0.12  | 0.08  | -0.03 | 0.08  | 0.25  | -0.04 | 0.25  | -0.11 |
| 21   | 8  | 0.07  | -0.06 | 0.00  | -0.08 | -0.01 | 0.00  | 0.06  | -0.17 | 0.04  |
| 22   | 8  | 0.03  | 0.03  | -0.02 | 0.06  | -0.22 | 0.05  | 0.10  | -0.10 | 0.04  |
| 23   | 1  | 0.07  | -0.03 | -0.25 | 0.19  | -0.09 | 0.19  | 0.14  | -0.05 | 0.10  |
| 24   | 8  | 0.01  | 0.00  | 0.00  | -0.02 | 0.02  | 0.03  | 0.01  | -0.01 | -0.02 |
| 25   | 1  | -0.12 | 0.06  | -0.12 | 0.20  | 0.10  | -0.14 | -0.06 | -0.10 | 0.18  |
| 26   | 7  | 0.00  | 0.00  | 0.00  | -0.02 | 0.00  | 0.00  | 0.00  | 0.01  | 0.00  |
| 27   | 1  | 0.01  | 0.00  | 0.00  | -0.03 | 0.00  | 0.01  | 0.00  | -0.01 | 0.01  |
| 28   | 7  | -0.01 | 0.00  | 0.00  | -0.01 | 0.00  | 0.00  | 0.00  | 0.00  | 0.00  |
| 29   | 1  | -0.26 | 0.05  | 0.10  | 0.16  | -0.07 | -0.04 | 0.08  | -0.05 | -0.01 |
| 30   | 6  | 0.00  | -0.01 | -0.02 | -0.01 | 0.01  | 0.00  | 0.00  | 0.00  | 0.00  |
| 31   | 1  | 0.01  | -0.01 | -0.02 | -0.02 | 0.00  | 0.01  | 0.00  | 0.00  | 0.00  |
| 32   | 6  | 0.00  | -0.01 | -0.02 | -0.02 | 0.00  | 0.00  | 0.00  | 0.00  | 0.00  |
| 33   | 1  | 0.00  | -0.01 | -0.02 | -0.02 | 0.00  | 0.00  | 0.00  | 0.00  | 0.00  |
| 34   | 6  | 0.00  | -0.01 | -0.01 | -0.02 | 0.00  | 0.00  | 0.00  | 0.00  | 0.00  |
| 35   | 1  | -0.02 | -0.01 | -0.02 | -0.02 | 0.00  | 0.01  | 0.00  | 0.00  | 0.00  |
| 36   | 1  | -0.03 | -0.08 | -0.02 | 0.12  | -0.28 | 0.05  | -0.09 | 0.26  | -0.02 |

28

29

30

A

A

A

|                |          |          |          |
|----------------|----------|----------|----------|
| Frequencies -- | 416.9455 | 446.6578 | 490.8540 |
| Red. masses -- | 1.4255   | 3.8984   | 1.1546   |
| Frc consts --  | 0.1460   | 0.4582   | 0.1639   |
| IR Inten --    | 57.4163  | 15.4117  | 27.5832  |
| Raman Activ -- | 0.9269   | 3.6535   | 0.6709   |
| Depolar (P) -- | 0.4062   | 0.1751   | 0.5954   |
| Depolar (U) -- | 0.5777   | 0.2981   | 0.7464   |

| Atom | AN | X     | Y     | Z     | X     | Y     | Z     | X     | Y     | Z     |
|------|----|-------|-------|-------|-------|-------|-------|-------|-------|-------|
| 1    | 8  | 0.02  | -0.06 | -0.04 | 0.00  | 0.01  | 0.00  | -0.02 | 0.00  | -0.04 |
| 2    | 1  | 0.09  | -0.07 | -0.09 | -0.22 | 0.01  | 0.09  | -0.48 | 0.02  | 0.18  |
| 3    | 1  | 0.33  | 0.63  | 0.20  | 0.18  | -0.12 | 0.19  | 0.51  | -0.07 | 0.48  |
| 4    | 6  | 0.01  | -0.02 | -0.03 | 0.07  | 0.02  | 0.22  | -0.01 | -0.01 | -0.04 |
| 5    | 6  | 0.00  | 0.00  | 0.00  | 0.03  | -0.01 | 0.02  | 0.00  | 0.00  | 0.00  |
| 6    | 6  | 0.02  | 0.03  | 0.00  | 0.09  | -0.02 | -0.13 | -0.01 | 0.00  | 0.00  |
| 7    | 6  | -0.01 | -0.03 | 0.00  | 0.01  | -0.03 | 0.12  | 0.00  | 0.00  | 0.00  |
| 8    | 6  | 0.01  | 0.00  | -0.01 | 0.07  | -0.04 | -0.20 | -0.01 | 0.00  | 0.01  |
| 9    | 6  | -0.02 | 0.01  | 0.01  | -0.05 | 0.00  | 0.00  | 0.01  | 0.00  | 0.00  |
| 10   | 6  | 0.02  | 0.04  | 0.01  | 0.11  | 0.01  | 0.00  | -0.02 | 0.01  | 0.01  |
| 11   | 1  | 0.04  | 0.05  | 0.02  | 0.10  | -0.06 | -0.37 | -0.01 | 0.01  | 0.02  |
| 12   | 8  | -0.01 | 0.02  | 0.01  | -0.05 | -0.07 | -0.03 | 0.00  | 0.03  | 0.01  |
| 13   | 8  | -0.05 | -0.07 | 0.03  | -0.06 | -0.03 | -0.02 | 0.01  | -0.01 | 0.04  |
| 14   | 6  | 0.01  | 0.03  | -0.03 | 0.09  | 0.04  | 0.13  | -0.01 | 0.00  | -0.03 |
| 15   | 6  | 0.02  | 0.00  | 0.00  | 0.03  | 0.00  | -0.13 | 0.00  | 0.00  | 0.02  |
| 16   | 8  | -0.04 | 0.00  | 0.00  | -0.10 | 0.00  | -0.02 | 0.01  | 0.00  | 0.00  |
| 17   | 8  | -0.01 | 0.01  | 0.01  | -0.10 | 0.02  | 0.02  | 0.02  | 0.00  | 0.00  |
| 18   | 1  | 0.02  | 0.05  | 0.05  | 0.11  | 0.02  | -0.02 | -0.02 | 0.01  | 0.04  |
| 19   | 1  | -0.06 | -0.06 | -0.11 | -0.12 | 0.01  | -0.20 | -0.01 | 0.01  | -0.26 |
| 20   | 1  | -0.01 | 0.03  | -0.05 | 0.07  | 0.09  | 0.35  | -0.01 | -0.01 | -0.05 |
| 21   | 8  | 0.02  | -0.02 | 0.01  | -0.02 | 0.07  | 0.03  | 0.01  | -0.01 | 0.00  |
| 22   | 8  | 0.01  | 0.02  | 0.00  | -0.03 | 0.04  | 0.00  | 0.01  | 0.00  | 0.00  |
| 23   | 1  | -0.02 | 0.01  | 0.00  | -0.22 | 0.06  | 0.39  | 0.02  | 0.00  | -0.06 |
| 24   | 8  | -0.03 | 0.03  | 0.03  | 0.02  | -0.01 | -0.02 | 0.03  | -0.02 | -0.02 |
| 25   | 1  | 0.21  | 0.17  | -0.27 | -0.12 | -0.04 | 0.05  | -0.20 | -0.09 | 0.14  |
| 26   | 7  | 0.00  | 0.00  | 0.00  | 0.01  | 0.00  | 0.00  | 0.00  | 0.00  | 0.00  |
| 27   | 1  | 0.00  | 0.00  | 0.00  | 0.02  | 0.00  | -0.01 | 0.00  | 0.00  | 0.00  |
| 28   | 7  | 0.00  | 0.00  | 0.00  | 0.00  | 0.00  | 0.00  | 0.00  | 0.00  | 0.00  |
| 29   | 1  | -0.02 | -0.02 | 0.01  | -0.11 | 0.04  | 0.05  | 0.03  | 0.02  | -0.01 |
| 30   | 6  | 0.00  | 0.00  | 0.00  | 0.00  | 0.00  | 0.00  | 0.00  | 0.00  | 0.00  |
| 31   | 1  | 0.00  | 0.00  | 0.00  | 0.01  | 0.00  | 0.00  | 0.00  | 0.00  | 0.00  |
| 32   | 6  | 0.00  | 0.00  | 0.00  | 0.01  | 0.00  | 0.00  | 0.00  | 0.00  | 0.00  |
| 33   | 1  | 0.00  | 0.00  | 0.00  | 0.01  | 0.00  | 0.00  | 0.00  | 0.00  | 0.00  |
| 34   | 6  | 0.00  | 0.00  | 0.00  | 0.01  | 0.00  | 0.00  | 0.00  | 0.00  | 0.00  |
| 35   | 1  | 0.01  | 0.00  | 0.00  | 0.02  | 0.00  | 0.00  | 0.00  | 0.00  | 0.00  |
| 36   | 1  | 0.16  | -0.44 | 0.04  | -0.08 | 0.13  | -0.03 | -0.11 | 0.27  | -0.04 |

31

32

33

A

A

A

Frequencies -- 547.9792 553.0716 597.1266

Red. masses -- 4.9908 4.3530 3.7970

Frc consts -- 0.8830 0.7845 0.7977

IR Inten -- 2.0101 14.0298 29.3137

Raman Activ -- 0.6730 6.6938 0.6397

Depolar (P) -- 0.4958 0.2227 0.7142

Depolar (U) -- 0.6629 0.3643 0.8332

| Atom | AN | X     | Y     | Z     | X     | Y     | Z     | X     | Y     | Z     |
|------|----|-------|-------|-------|-------|-------|-------|-------|-------|-------|
| 1    | 8  | 0.01  | 0.00  | 0.00  | 0.00  | 0.00  | -0.01 | 0.01  | 0.00  | 0.01  |
| 2    | 1  | -0.10 | -0.06 | -0.02 | 0.01  | 0.07  | 0.05  | 0.06  | 0.01  | -0.01 |
| 3    | 1  | 0.10  | 0.01  | 0.08  | 0.05  | 0.03  | 0.04  | -0.04 | 0.02  | -0.04 |
| 4    | 6  | -0.07 | 0.08  | 0.03  | 0.07  | -0.02 | -0.13 | -0.05 | 0.06  | 0.13  |
| 5    | 6  | 0.01  | 0.15  | -0.08 | 0.09  | 0.03  | 0.01  | 0.01  | 0.11  | 0.20  |
| 6    | 6  | -0.13 | 0.04  | 0.14  | 0.13  | -0.01 | 0.01  | -0.10 | -0.01 | -0.15 |
| 7    | 6  | 0.10  | -0.05 | -0.05 | -0.10 | 0.03  | -0.04 | 0.05  | -0.02 | -0.01 |
| 8    | 6  | 0.09  | 0.10  | 0.04  | 0.10  | 0.04  | 0.12  | 0.03  | 0.06  | 0.04  |
| 9    | 6  | 0.00  | 0.16  | -0.07 | 0.00  | 0.01  | -0.01 | 0.02  | -0.01 | -0.10 |
| 10   | 6  | 0.00  | -0.09 | -0.15 | 0.19  | -0.01 | 0.04  | -0.04 | 0.02  | 0.20  |
| 11   | 1  | -0.23 | 0.00  | 0.21  | 0.11  | -0.01 | 0.08  | -0.15 | -0.10 | -0.54 |
| 12   | 8  | 0.12  | 0.06  | -0.03 | -0.08 | -0.12 | 0.05  | 0.05  | 0.03  | -0.02 |
| 13   | 8  | -0.03 | -0.17 | 0.02  | -0.03 | 0.08  | 0.03  | 0.00  | -0.07 | 0.00  |

|    |   |       |       |       |       |       |       |       |       |       |
|----|---|-------|-------|-------|-------|-------|-------|-------|-------|-------|
| 14 | 6 | 0.14  | 0.04  | 0.13  | 0.17  | 0.00  | -0.06 | 0.05  | 0.00  | -0.14 |
| 15 | 6 | -0.10 | -0.01 | -0.06 | -0.13 | -0.02 | 0.06  | -0.02 | 0.01  | -0.03 |
| 16 | 8 | -0.02 | -0.05 | 0.04  | -0.08 | -0.03 | -0.04 | 0.12  | -0.04 | -0.03 |
| 17 | 8 | 0.01  | -0.04 | 0.03  | -0.08 | 0.02  | 0.04  | -0.10 | -0.04 | -0.04 |
| 18 | 1 | -0.01 | -0.30 | -0.38 | 0.19  | -0.03 | 0.08  | -0.05 | -0.07 | 0.23  |
| 19 | 1 | -0.18 | -0.06 | -0.08 | 0.04  | 0.03  | 0.08  | -0.07 | -0.02 | -0.02 |
| 20 | 1 | 0.24  | -0.01 | 0.21  | 0.18  | -0.03 | -0.19 | 0.11  | -0.10 | -0.46 |
| 21 | 8 | -0.12 | 0.05  | -0.04 | -0.10 | 0.13  | -0.06 | -0.04 | -0.02 | 0.00  |
| 22 | 8 | 0.00  | -0.15 | 0.01  | -0.06 | -0.11 | 0.02  | 0.01  | -0.03 | 0.03  |
| 23 | 1 | 0.13  | 0.01  | 0.22  | 0.27  | -0.12 | -0.61 | 0.15  | 0.01  | -0.11 |
| 24 | 8 | -0.01 | 0.00  | -0.01 | 0.01  | -0.01 | 0.00  | 0.01  | 0.00  | 0.01  |
| 25 | 1 | 0.24  | -0.05 | 0.10  | -0.29 | 0.05  | -0.11 | -0.23 | 0.07  | -0.12 |
| 26 | 7 | 0.00  | 0.01  | -0.01 | 0.00  | 0.00  | 0.00  | 0.00  | 0.00  | 0.00  |
| 27 | 1 | 0.00  | -0.04 | 0.02  | 0.01  | -0.01 | -0.01 | 0.01  | -0.01 | 0.00  |
| 28 | 7 | 0.00  | 0.00  | 0.00  | 0.00  | 0.00  | 0.00  | -0.01 | 0.00  | 0.00  |
| 29 | 1 | 0.00  | -0.13 | 0.06  | -0.08 | 0.06  | 0.10  | -0.10 | 0.01  | 0.05  |
| 30 | 6 | 0.00  | 0.01  | 0.00  | 0.00  | 0.00  | 0.00  | 0.00  | 0.00  | 0.00  |
| 31 | 1 | 0.00  | 0.01  | 0.00  | 0.00  | 0.00  | 0.00  | 0.00  | 0.00  | -0.01 |
| 32 | 6 | 0.00  | 0.00  | 0.00  | 0.01  | 0.00  | 0.00  | 0.00  | 0.00  | 0.00  |
| 33 | 1 | 0.00  | 0.00  | 0.00  | 0.01  | 0.00  | 0.00  | 0.00  | 0.00  | 0.00  |
| 34 | 6 | 0.00  | 0.00  | 0.00  | 0.01  | 0.00  | 0.00  | 0.00  | 0.00  | 0.00  |
| 35 | 1 | 0.00  | -0.01 | 0.01  | 0.01  | 0.00  | 0.00  | -0.01 | 0.00  | 0.00  |
| 36 | 1 | 0.01  | 0.02  | 0.00  | -0.02 | -0.01 | -0.01 | 0.00  | -0.04 | 0.00  |

34

35

36

A

A

A

|                |          |          |          |
|----------------|----------|----------|----------|
| Frequencies -- | 599.6541 | 624.2088 | 628.6379 |
| Red. masses -- | 1.3125   | 1.3710   | 2.9615   |
| Frc consts --  | 0.2781   | 0.3147   | 0.6895   |
| IR Inten --    | 76.4465  | 55.1212  | 4.3421   |
| Raman Activ -- | 2.0618   | 1.5890   | 0.3522   |
| Depolar (P) -- | 0.6609   | 0.3636   | 0.5036   |
| Depolar (U) -- | 0.7958   | 0.5333   | 0.6699   |

Atom AN

X

Y

Z

X

Y

Z

X

Y

Z

|    |   |       |       |       |       |       |       |       |       |       |
|----|---|-------|-------|-------|-------|-------|-------|-------|-------|-------|
| 1  | 8 | 0.00  | -0.01 | 0.00  | 0.00  | 0.01  | 0.00  | 0.00  | -0.01 | 0.00  |
| 2  | 1 | 0.06  | 0.08  | 0.04  | -0.15 | -0.14 | -0.07 | 0.07  | 0.07  | 0.04  |
| 3  | 1 | 0.01  | 0.04  | 0.00  | 0.03  | -0.06 | 0.04  | -0.01 | 0.03  | -0.01 |
| 4  | 6 | 0.00  | -0.02 | -0.05 | 0.01  | 0.01  | -0.03 | 0.00  | -0.01 | 0.01  |
| 5  | 6 | 0.02  | 0.00  | 0.05  | -0.02 | 0.00  | 0.02  | 0.01  | 0.00  | -0.01 |
| 6  | 6 | 0.01  | 0.00  | 0.03  | 0.03  | 0.00  | -0.02 | -0.01 | 0.00  | 0.01  |
| 7  | 6 | -0.03 | 0.00  | -0.05 | 0.00  | 0.02  | 0.01  | 0.00  | -0.01 | -0.01 |
| 8  | 6 | 0.01  | 0.02  | 0.08  | -0.01 | 0.00  | 0.07  | 0.00  | 0.00  | -0.03 |
| 9  | 6 | 0.02  | -0.03 | 0.01  | -0.03 | 0.01  | -0.03 | 0.02  | 0.00  | 0.01  |
| 10 | 6 | 0.00  | 0.00  | -0.01 | 0.04  | 0.01  | 0.04  | -0.02 | 0.00  | -0.01 |
| 11 | 1 | 0.02  | 0.01  | 0.05  | 0.02  | -0.01 | -0.03 | 0.00  | 0.00  | 0.01  |
| 12 | 8 | -0.01 | 0.00  | 0.02  | -0.01 | -0.03 | 0.00  | 0.00  | 0.01  | 0.00  |
| 13 | 8 | 0.01  | 0.01  | 0.01  | -0.02 | 0.02  | 0.01  | 0.01  | -0.01 | -0.01 |
| 14 | 6 | 0.01  | 0.01  | 0.00  | 0.00  | -0.03 | -0.03 | 0.00  | 0.01  | 0.01  |
| 15 | 6 | 0.00  | -0.01 | -0.04 | 0.00  | -0.01 | 0.01  | 0.00  | 0.01  | 0.00  |
| 16 | 8 | 0.01  | 0.00  | -0.02 | 0.03  | 0.00  | 0.01  | -0.01 | 0.00  | -0.01 |
| 17 | 8 | -0.01 | 0.00  | 0.00  | -0.03 | 0.00  | -0.02 | 0.01  | 0.00  | 0.01  |
| 18 | 1 | 0.00  | -0.01 | -0.06 | 0.04  | 0.03  | 0.04  | -0.02 | -0.01 | -0.02 |
| 19 | 1 | 0.05  | -0.02 | 0.06  | -0.05 | 0.04  | -0.05 | 0.03  | -0.02 | 0.03  |
| 20 | 1 | 0.01  | -0.01 | -0.10 | -0.02 | -0.04 | -0.13 | 0.00  | 0.02  | 0.06  |
| 21 | 8 | 0.00  | 0.01  | -0.01 | 0.00  | 0.02  | -0.01 | 0.00  | -0.01 | 0.01  |
| 22 | 8 | 0.02  | -0.02 | -0.05 | 0.00  | -0.01 | -0.03 | 0.00  | 0.01  | 0.01  |
| 23 | 1 | -0.30 | 0.08  | 0.82  | -0.15 | 0.01  | 0.30  | 0.06  | 0.00  | -0.12 |
| 24 | 8 | 0.01  | 0.00  | 0.01  | -0.02 | 0.00  | -0.01 | 0.01  | 0.00  | 0.01  |
| 25 | 1 | -0.38 | 0.08  | -0.15 | 0.77  | -0.17 | 0.33  | -0.38 | 0.08  | -0.16 |
| 26 | 7 | 0.00  | 0.00  | 0.00  | 0.00  | 0.05  | -0.02 | 0.00  | 0.19  | -0.09 |
| 27 | 1 | 0.00  | 0.00  | 0.00  | 0.00  | -0.02 | 0.01  | 0.00  | -0.07 | 0.03  |

|    |   |       |       |       |       |       |       |       |       |       |
|----|---|-------|-------|-------|-------|-------|-------|-------|-------|-------|
| 28 | 7 | 0.00  | 0.00  | 0.00  | 0.00  | -0.01 | 0.01  | 0.00  | -0.05 | 0.03  |
| 29 | 1 | -0.01 | 0.06  | 0.02  | -0.05 | -0.10 | -0.02 | 0.02  | 0.02  | 0.03  |
| 30 | 6 | 0.00  | 0.00  | 0.00  | 0.00  | -0.02 | 0.01  | 0.00  | -0.10 | 0.05  |
| 31 | 1 | 0.00  | 0.00  | 0.00  | 0.00  | -0.05 | 0.03  | -0.01 | -0.29 | 0.14  |
| 32 | 6 | 0.00  | 0.00  | 0.00  | 0.00  | 0.04  | -0.02 | 0.00  | 0.20  | -0.10 |
| 33 | 1 | 0.00  | 0.00  | 0.00  | 0.00  | 0.06  | -0.03 | 0.01  | 0.30  | -0.15 |
| 34 | 6 | 0.00  | 0.00  | 0.00  | 0.00  | -0.05 | 0.02  | 0.00  | -0.21 | 0.10  |
| 35 | 1 | 0.00  | 0.01  | 0.00  | -0.01 | -0.12 | 0.06  | -0.01 | -0.57 | 0.28  |
| 36 | 1 | -0.01 | -0.02 | -0.01 | 0.03  | 0.06  | 0.01  | -0.01 | -0.02 | -0.01 |

|                | 37       | 38       | 39       |
|----------------|----------|----------|----------|
|                | A        | A        | A        |
| Frequencies -- | 661.8456 | 673.0182 | 698.1152 |
| Red. masses -- | 4.6323   | 5.2897   | 4.8311   |
| Frc consts --  | 1.1955   | 1.4117   | 1.3872   |
| IR Inten --    | 82.9748  | 0.3002   | 45.2418  |
| Raman Activ -- | 2.3569   | 0.3728   | 0.8714   |
| Depolar (P) -- | 0.1663   | 0.7346   | 0.2121   |
| Depolar (U) -- | 0.2852   | 0.8470   | 0.3500   |

| Atom | AN | X     | Y     | Z     | X     | Y     | Z     | X     | Y     | Z     |
|------|----|-------|-------|-------|-------|-------|-------|-------|-------|-------|
| 1    | 8  | -0.01 | 0.00  | 0.00  | 0.00  | 0.00  | 0.00  | 0.01  | -0.01 | -0.01 |
| 2    | 1  | 0.04  | 0.04  | 0.02  | 0.02  | 0.02  | 0.01  | 0.00  | -0.01 | 0.00  |
| 3    | 1  | -0.02 | 0.00  | -0.02 | 0.00  | 0.00  | 0.00  | 0.06  | 0.07  | 0.03  |
| 4    | 6  | -0.11 | -0.03 | 0.02  | 0.00  | -0.01 | 0.00  | 0.01  | 0.19  | -0.03 |
| 5    | 6  | -0.07 | -0.06 | 0.04  | 0.01  | -0.01 | 0.00  | -0.16 | 0.07  | 0.00  |
| 6    | 6  | -0.13 | 0.15  | -0.02 | 0.01  | -0.01 | 0.00  | 0.04  | 0.08  | 0.00  |
| 7    | 6  | -0.02 | -0.05 | -0.01 | 0.00  | 0.00  | 0.00  | 0.08  | 0.12  | -0.06 |
| 8    | 6  | 0.07  | -0.17 | 0.02  | 0.00  | -0.01 | 0.00  | -0.08 | -0.04 | 0.00  |
| 9    | 6  | -0.03 | 0.01  | 0.00  | 0.01  | 0.02  | -0.01 | -0.10 | -0.02 | 0.03  |
| 10   | 6  | 0.06  | 0.04  | -0.01 | -0.01 | 0.00  | 0.00  | 0.19  | -0.03 | 0.00  |
| 11   | 1  | -0.14 | 0.14  | -0.04 | 0.02  | 0.00  | 0.00  | -0.18 | -0.03 | -0.02 |
| 12   | 8  | -0.02 | 0.09  | 0.01  | -0.01 | 0.01  | 0.00  | 0.10  | -0.16 | -0.02 |
| 13   | 8  | 0.06  | -0.01 | -0.02 | 0.01  | 0.00  | 0.00  | -0.17 | 0.00  | 0.07  |
| 14   | 6  | 0.10  | 0.04  | 0.00  | -0.01 | 0.00  | 0.00  | -0.07 | -0.16 | 0.05  |
| 15   | 6  | 0.10  | -0.18 | 0.05  | 0.00  | 0.00  | 0.01  | 0.02  | -0.01 | -0.02 |
| 16   | 8  | 0.04  | 0.01  | 0.04  | -0.01 | 0.00  | -0.01 | 0.08  | 0.06  | 0.09  |
| 17   | 8  | 0.04  | -0.04 | -0.04 | 0.00  | 0.01  | 0.00  | 0.08  | -0.07 | -0.11 |
| 18   | 1  | 0.05  | -0.15 | 0.01  | -0.01 | 0.02  | 0.01  | 0.19  | 0.05  | -0.07 |
| 19   | 1  | 0.14  | -0.08 | 0.00  | 0.02  | -0.01 | 0.00  | -0.39 | 0.18  | 0.07  |
| 20   | 1  | -0.03 | 0.12  | -0.01 | -0.01 | 0.00  | 0.00  | -0.18 | -0.10 | 0.03  |
| 21   | 8  | 0.14  | 0.21  | 0.03  | 0.01  | 0.00  | 0.00  | 0.01  | 0.00  | 0.01  |
| 22   | 8  | -0.19 | -0.05 | -0.05 | 0.00  | 0.00  | 0.00  | -0.01 | 0.00  | 0.01  |
| 23   | 1  | -0.60 | -0.40 | -0.26 | -0.02 | -0.01 | 0.00  | -0.03 | -0.02 | -0.05 |
| 24   | 8  | 0.00  | 0.00  | 0.00  | 0.00  | 0.00  | 0.00  | 0.02  | 0.01  | 0.01  |
| 25   | 1  | -0.08 | 0.01  | -0.02 | -0.07 | 0.01  | -0.02 | -0.48 | 0.12  | -0.22 |
| 26   | 7  | 0.00  | 0.00  | 0.00  | 0.01  | 0.24  | -0.12 | 0.00  | 0.01  | 0.00  |
| 27   | 1  | -0.01 | 0.02  | 0.01  | 0.00  | -0.14 | 0.06  | -0.02 | 0.00  | 0.03  |
| 28   | 7  | 0.00  | 0.00  | 0.00  | -0.01 | -0.34 | 0.17  | 0.01  | -0.01 | 0.00  |
| 29   | 1  | 0.03  | -0.03 | -0.09 | -0.01 | -0.13 | 0.09  | 0.08  | -0.05 | -0.25 |
| 30   | 6  | 0.00  | 0.00  | 0.01  | 0.01  | 0.28  | -0.14 | 0.00  | 0.01  | 0.01  |
| 31   | 1  | 0.00  | -0.01 | 0.01  | 0.01  | 0.65  | -0.32 | 0.00  | 0.02  | 0.00  |
| 32   | 6  | 0.00  | 0.01  | 0.00  | 0.00  | -0.16 | 0.08  | -0.01 | 0.00  | 0.00  |
| 33   | 1  | 0.00  | 0.01  | -0.01 | 0.00  | -0.24 | 0.12  | -0.01 | -0.01 | 0.00  |
| 34   | 6  | 0.00  | 0.00  | 0.00  | 0.00  | -0.02 | 0.01  | -0.01 | 0.00  | 0.00  |
| 35   | 1  | 0.00  | -0.01 | 0.00  | 0.00  | -0.01 | 0.01  | -0.01 | -0.01 | 0.00  |
| 36   | 1  | 0.00  | 0.01  | 0.00  | 0.00  | 0.00  | 0.00  | -0.02 | -0.05 | -0.01 |

|                | 40       | 41       | 42       |
|----------------|----------|----------|----------|
|                | A        | A        | A        |
| Frequencies -- | 730.5715 | 756.2342 | 757.1292 |
| Red. masses -- | 5.4394   | 2.6835   | 4.6255   |
| Frc consts --  | 1.7105   | 0.9042   | 1.5622   |

|             |    |         |       |         |       |         |       |       |       |       |
|-------------|----|---------|-------|---------|-------|---------|-------|-------|-------|-------|
| IR Inten    | -- | 12.9042 |       | 66.8115 |       | 24.5966 |       |       |       |       |
| Raman Activ | -- | 2.7741  |       | 9.7700  |       | 5.9212  |       |       |       |       |
| Depolar (P) | -- | 0.0443  |       | 0.0269  |       | 0.0898  |       |       |       |       |
| Depolar (U) | -- | 0.0849  |       | 0.0523  |       | 0.1649  |       |       |       |       |
| Atom        | AN | X       | Y     | Z       | X     | Y       | Z     | X     | Y     | Z     |
| 1           | 8  | 0.00    | 0.01  | -0.01   | -0.02 | -0.03   | -0.01 | 0.00  | -0.01 | -0.01 |
| 2           | 1  | -0.05   | 0.01  | 0.02    | 0.33  | 0.52    | 0.32  | 0.06  | 0.15  | 0.10  |
| 3           | 1  | 0.06    | -0.01 | 0.05    | 0.08  | 0.06    | 0.07  | 0.08  | 0.04  | 0.07  |
| 4           | 6  | -0.04   | -0.02 | -0.08   | 0.00  | -0.03   | 0.03  | 0.08  | 0.00  | 0.01  |
| 5           | 6  | -0.01   | 0.01  | 0.26    | -0.06 | -0.01   | -0.01 | 0.05  | 0.04  | 0.09  |
| 6           | 6  | -0.02   | 0.06  | 0.10    | 0.07  | 0.02    | -0.01 | 0.11  | -0.09 | 0.07  |
| 7           | 6  | -0.11   | -0.02 | -0.23   | -0.08 | -0.08   | 0.01  | -0.04 | 0.05  | -0.20 |
| 8           | 6  | 0.04    | -0.01 | -0.10   | -0.03 | -0.01   | 0.02  | -0.05 | -0.02 | -0.03 |
| 9           | 6  | -0.05   | -0.25 | 0.09    | -0.08 | 0.15    | -0.06 | 0.08  | 0.25  | -0.15 |
| 10          | 6  | 0.04    | -0.01 | -0.08   | 0.12  | 0.01    | 0.02  | -0.10 | 0.03  | 0.00  |
| 11          | 1  | -0.02   | 0.06  | 0.04    | 0.06  | 0.00    | -0.09 | 0.17  | -0.11 | -0.21 |
| 12          | 8  | -0.01   | 0.02  | 0.08    | -0.09 | 0.08    | 0.03  | 0.04  | -0.05 | 0.04  |
| 13          | 8  | 0.04    | 0.00  | 0.04    | 0.07  | -0.05   | -0.05 | -0.05 | 0.03  | 0.05  |
| 14          | 6  | 0.06    | 0.06  | 0.11    | -0.01 | -0.05   | 0.01  | -0.16 | -0.02 | 0.06  |
| 15          | 6  | 0.06    | 0.01  | -0.25   | -0.03 | 0.05    | -0.03 | 0.12  | -0.08 | -0.11 |
| 16          | 8  | 0.07    | 0.06  | -0.02   | 0.02  | 0.01    | 0.10  | -0.02 | -0.09 | -0.03 |
| 17          | 8  | -0.06   | 0.02  | -0.09   | 0.03  | -0.07   | -0.06 | -0.02 | -0.01 | 0.09  |
| 18          | 1  | 0.04    | -0.13 | -0.30   | 0.13  | 0.06    | -0.08 | -0.10 | 0.20  | -0.40 |
| 19          | 1  | 0.16    | -0.09 | 0.12    | 0.31  | -0.24   | 0.21  | -0.03 | 0.01  | 0.21  |
| 20          | 1  | 0.05    | 0.06  | 0.06    | -0.07 | -0.03   | -0.08 | -0.17 | -0.07 | -0.17 |
| 21          | 8  | -0.07   | -0.03 | 0.07    | -0.05 | -0.03   | -0.01 | 0.08  | 0.04  | 0.07  |
| 22          | 8  | 0.02    | 0.05  | 0.09    | 0.04  | 0.04    | 0.01  | -0.08 | -0.03 | 0.03  |
| 23          | 1  | 0.28    | 0.07  | -0.34   | 0.16  | 0.13    | 0.05  | -0.20 | -0.21 | -0.25 |
| 24          | 8  | -0.01   | -0.01 | -0.01   | 0.00  | -0.01   | -0.02 | 0.00  | -0.01 | -0.01 |
| 25          | 1  | 0.38    | -0.10 | 0.18    | -0.01 | -0.06   | 0.08  | 0.06  | -0.04 | 0.05  |
| 26          | 7  | 0.00    | 0.01  | 0.00    | 0.00  | 0.00    | 0.00  | 0.00  | 0.00  | 0.00  |
| 27          | 1  | 0.01    | 0.12  | -0.05   | -0.01 | -0.06   | 0.05  | 0.00  | -0.13 | 0.05  |
| 28          | 7  | 0.00    | -0.02 | 0.01    | 0.00  | 0.01    | -0.01 | 0.00  | 0.02  | -0.01 |
| 29          | 1  | -0.07   | 0.07  | -0.11   | 0.02  | -0.14   | -0.14 | -0.03 | -0.08 | 0.21  |
| 30          | 6  | 0.00    | 0.01  | -0.01   | 0.00  | 0.00    | 0.01  | 0.00  | -0.01 | 0.00  |
| 31          | 1  | 0.01    | 0.01  | -0.01   | 0.00  | 0.00    | 0.01  | 0.00  | 0.00  | 0.00  |
| 32          | 6  | 0.00    | 0.00  | 0.00    | 0.00  | 0.00    | 0.00  | 0.00  | -0.01 | 0.00  |
| 33          | 1  | 0.00    | -0.03 | 0.01    | 0.00  | 0.01    | -0.01 | 0.00  | 0.06  | -0.02 |
| 34          | 6  | 0.00    | -0.01 | 0.00    | 0.00  | 0.00    | 0.00  | 0.00  | 0.00  | 0.00  |
| 35          | 1  | -0.01   | -0.01 | 0.00    | -0.01 | 0.00    | 0.00  | 0.01  | 0.03  | -0.01 |
| 36          | 1  | 0.01    | 0.06  | 0.01    | -0.05 | 0.13    | -0.02 | 0.00  | 0.03  | 0.00  |

|             |    |          |      |          |       |          |       |       |       |       |
|-------------|----|----------|------|----------|-------|----------|-------|-------|-------|-------|
|             |    | 43       |      | 44       |       | 45       |       |       |       |       |
|             |    | A        |      | A        |       | A        |       |       |       |       |
| Frequencies | -- | 770.3337 |      | 789.9819 |       | 796.3533 |       |       |       |       |
| Red. masses | -- | 1.1848   |      | 1.4306   |       | 1.7481   |       |       |       |       |
| Frc consts  | -- | 0.4142   |      | 0.5260   |       | 0.6532   |       |       |       |       |
| IR Inten    | -- | 38.8178  |      | 335.8789 |       | 38.1649  |       |       |       |       |
| Raman Activ | -- | 0.3213   |      | 2.1504   |       | 1.0217   |       |       |       |       |
| Depolar (P) | -- | 0.6637   |      | 0.3045   |       | 0.6559   |       |       |       |       |
| Depolar (U) | -- | 0.7978   |      | 0.4669   |       | 0.7922   |       |       |       |       |
| Atom        | AN | X        | Y    | Z        | X     | Y        | Z     |       |       |       |
| 1           | 8  | 0.00     | 0.00 | 0.00     | -0.01 | -0.03    | -0.02 | 0.01  | 0.02  | 0.01  |
| 2           | 1  | 0.02     | 0.03 | 0.02     | 0.32  | 0.54     | 0.34  | -0.18 | -0.31 | -0.19 |
| 3           | 1  | 0.01     | 0.00 | 0.01     | 0.14  | 0.10     | 0.12  | -0.08 | -0.06 | -0.07 |
| 4           | 6  | 0.00     | 0.00 | 0.00     | 0.00  | 0.02     | 0.01  | 0.00  | -0.02 | -0.04 |
| 5           | 6  | 0.00     | 0.00 | 0.00     | 0.02  | 0.03     | 0.06  | 0.00  | 0.04  | 0.16  |
| 6           | 6  | 0.00     | 0.00 | 0.00     | -0.02 | -0.01    | -0.01 | 0.02  | -0.01 | -0.02 |
| 7           | 6  | 0.00     | 0.00 | 0.00     | 0.03  | 0.03     | -0.01 | -0.01 | -0.02 | 0.02  |
| 8           | 6  | 0.00     | 0.00 | 0.00     | 0.01  | 0.00     | -0.05 | -0.01 | -0.02 | -0.04 |
| 9           | 6  | 0.00     | 0.01 | 0.00     | 0.01  | -0.04    | 0.00  | 0.00  | 0.10  | -0.07 |

|    |   |       |       |       |       |       |       |       |       |       |
|----|---|-------|-------|-------|-------|-------|-------|-------|-------|-------|
| 10 | 6 | 0.00  | 0.00  | 0.00  | -0.04 | -0.02 | -0.04 | 0.02  | -0.01 | -0.09 |
| 11 | 1 | 0.00  | 0.00  | -0.01 | -0.02 | 0.03  | 0.19  | 0.05  | 0.08  | 0.40  |
| 12 | 8 | 0.00  | 0.00  | 0.00  | 0.04  | -0.02 | -0.01 | -0.02 | 0.01  | 0.00  |
| 13 | 8 | 0.00  | 0.00  | 0.00  | -0.06 | 0.01  | 0.00  | 0.03  | -0.01 | 0.00  |
| 14 | 6 | 0.00  | 0.00  | 0.00  | 0.01  | 0.01  | -0.02 | -0.02 | -0.02 | -0.02 |
| 15 | 6 | 0.00  | 0.00  | 0.00  | -0.02 | 0.00  | 0.08  | -0.01 | 0.01  | 0.01  |
| 16 | 8 | 0.00  | -0.01 | 0.00  | 0.01  | 0.00  | -0.02 | 0.03  | -0.02 | 0.02  |
| 17 | 8 | 0.00  | 0.00  | 0.00  | -0.02 | 0.01  | 0.00  | -0.02 | -0.04 | -0.02 |
| 18 | 1 | 0.00  | 0.00  | -0.01 | -0.04 | 0.03  | 0.32  | 0.02  | 0.15  | 0.52  |
| 19 | 1 | 0.00  | 0.00  | 0.02  | -0.01 | -0.04 | 0.31  | 0.00  | 0.03  | -0.18 |
| 20 | 1 | 0.00  | 0.00  | -0.01 | 0.03  | 0.06  | 0.28  | -0.05 | 0.09  | 0.43  |
| 21 | 8 | 0.00  | 0.00  | 0.00  | 0.02  | 0.00  | -0.02 | 0.00  | -0.01 | -0.01 |
| 22 | 8 | 0.00  | 0.00  | 0.00  | -0.01 | -0.02 | -0.02 | 0.01  | 0.01  | 0.00  |
| 23 | 1 | -0.01 | -0.01 | 0.00  | -0.06 | -0.03 | 0.04  | 0.02  | 0.02  | 0.01  |
| 24 | 8 | 0.00  | 0.00  | 0.00  | -0.01 | -0.01 | -0.02 | 0.00  | 0.01  | 0.01  |
| 25 | 1 | 0.00  | 0.00  | 0.01  | 0.16  | -0.09 | 0.15  | -0.11 | 0.06  | -0.09 |
| 26 | 7 | 0.00  | -0.03 | 0.02  | 0.00  | 0.00  | 0.00  | 0.00  | 0.00  | 0.00  |
| 27 | 1 | 0.00  | 0.19  | -0.10 | 0.00  | 0.03  | -0.02 | 0.00  | -0.14 | 0.07  |
| 28 | 7 | 0.00  | -0.03 | 0.01  | 0.00  | 0.00  | 0.00  | 0.00  | 0.01  | 0.00  |
| 29 | 1 | 0.00  | -0.01 | 0.01  | -0.02 | 0.02  | 0.02  | -0.02 | -0.04 | 0.01  |
| 30 | 6 | 0.00  | 0.04  | -0.02 | 0.00  | 0.00  | 0.00  | 0.00  | -0.01 | 0.00  |
| 31 | 1 | -0.01 | -0.22 | 0.11  | 0.00  | 0.00  | 0.00  | 0.00  | -0.01 | 0.00  |
| 32 | 6 | 0.00  | 0.08  | -0.04 | 0.00  | 0.00  | 0.00  | 0.00  | 0.00  | 0.00  |
| 33 | 1 | -0.01 | -0.74 | 0.35  | 0.00  | 0.03  | -0.01 | 0.00  | -0.04 | 0.02  |
| 34 | 6 | 0.00  | 0.06  | -0.03 | 0.00  | -0.01 | 0.00  | 0.00  | 0.01  | -0.01 |
| 35 | 1 | -0.01 | -0.40 | 0.20  | 0.00  | 0.02  | -0.01 | -0.01 | -0.05 | 0.02  |
| 36 | 1 | 0.00  | 0.01  | 0.00  | -0.04 | 0.12  | -0.01 | 0.02  | -0.07 | 0.01  |

46

47

48

A

A

A

|                |          |          |          |
|----------------|----------|----------|----------|
| Frequencies -- | 808.5027 | 817.0078 | 832.3006 |
| Red. masses -- | 5.8145   | 1.1793   | 6.0272   |
| Frc consts --  | 2.2394   | 0.4638   | 2.4600   |
| IR Inten --    | 20.4804  | 71.6444  | 13.8389  |
| Raman Activ -- | 0.4271   | 0.1264   | 4.1935   |
| Depolar (P) -- | 0.7096   | 0.6618   | 0.0821   |
| Depolar (U) -- | 0.8302   | 0.7965   | 0.1517   |

| Atom | AN | X     | Y     | Z     | X     | Y     | Z     | X     | Y     | Z     |
|------|----|-------|-------|-------|-------|-------|-------|-------|-------|-------|
| 1    | 8  | 0.01  | 0.02  | 0.00  | 0.00  | 0.00  | 0.00  | 0.00  | 0.01  | 0.00  |
| 2    | 1  | -0.22 | -0.31 | -0.19 | -0.03 | -0.05 | -0.03 | -0.06 | -0.10 | -0.06 |
| 3    | 1  | -0.03 | -0.05 | -0.03 | -0.01 | -0.01 | -0.01 | -0.01 | -0.01 | -0.01 |
| 4    | 6  | -0.01 | 0.05  | 0.20  | 0.00  | 0.00  | 0.01  | 0.10  | -0.07 | 0.03  |
| 5    | 6  | 0.00  | -0.01 | -0.02 | 0.00  | 0.01  | 0.01  | 0.06  | 0.01  | -0.02 |
| 6    | 6  | 0.01  | 0.03  | 0.03  | 0.01  | 0.00  | 0.00  | 0.10  | -0.22 | 0.04  |
| 7    | 6  | -0.14 | -0.02 | -0.36 | -0.01 | 0.00  | -0.01 | 0.00  | 0.03  | -0.05 |
| 8    | 6  | -0.01 | -0.06 | -0.19 | -0.01 | 0.00  | -0.01 | 0.09  | 0.08  | -0.04 |
| 9    | 6  | 0.01  | -0.02 | 0.01  | 0.00  | 0.03  | -0.02 | -0.23 | 0.04  | 0.05  |
| 10   | 6  | 0.08  | 0.01  | 0.03  | 0.01  | 0.00  | -0.01 | -0.24 | 0.01  | 0.01  |
| 11   | 1  | -0.05 | -0.09 | -0.43 | 0.01  | 0.00  | 0.01  | 0.32  | -0.13 | -0.03 |
| 12   | 8  | 0.01  | 0.02  | 0.10  | 0.00  | 0.00  | 0.01  | 0.03  | -0.03 | 0.00  |
| 13   | 8  | 0.05  | -0.02 | 0.07  | 0.01  | 0.00  | 0.00  | -0.02 | 0.04  | 0.02  |
| 14   | 6  | 0.01  | -0.02 | -0.01 | -0.01 | -0.01 | 0.00  | 0.09  | 0.20  | -0.03 |
| 15   | 6  | -0.14 | 0.06  | 0.35  | 0.00  | 0.00  | 0.01  | 0.01  | -0.03 | 0.06  |
| 16   | 8  | -0.01 | 0.00  | -0.02 | 0.00  | -0.02 | 0.01  | 0.00  | 0.11  | 0.22  |
| 17   | 8  | 0.00  | 0.01  | 0.02  | 0.00  | 0.00  | 0.00  | -0.02 | -0.13 | -0.23 |
| 18   | 1  | 0.08  | -0.03 | -0.18 | 0.01  | 0.03  | 0.04  | -0.24 | 0.02  | -0.07 |
| 19   | 1  | 0.10  | -0.06 | -0.02 | 0.01  | 0.00  | -0.02 | -0.05 | 0.07  | 0.00  |
| 20   | 1  | -0.03 | 0.05  | 0.19  | -0.01 | 0.00  | 0.04  | 0.31  | 0.06  | -0.06 |
| 21   | 8  | 0.02  | -0.03 | -0.10 | 0.00  | 0.00  | 0.00  | 0.04  | 0.02  | -0.01 |
| 22   | 8  | 0.05  | 0.01  | -0.08 | 0.00  | 0.00  | 0.00  | -0.03 | -0.05 | -0.02 |
| 23   | 1  | -0.04 | 0.06  | 0.22  | 0.00  | 0.00  | 0.01  | -0.09 | -0.09 | -0.01 |



|    |   |      |       |       |       |       |       |       |       |       |
|----|---|------|-------|-------|-------|-------|-------|-------|-------|-------|
| 24 | 8 | 0.00 | 0.00  | 0.01  | 0.00  | 0.00  | 0.00  | 0.01  | 0.01  | 0.01  |
| 25 | 1 | 0.06 | 0.01  | -0.01 | -0.03 | 0.01  | -0.02 | -0.15 | 0.04  | -0.07 |
| 26 | 7 | 0.00 | 0.00  | 0.00  | 0.00  | -0.02 | 0.01  | 0.00  | 0.00  | 0.01  |
| 27 | 1 | 0.00 | -0.18 | 0.08  | 0.02  | 0.83  | -0.41 | -0.01 | 0.04  | 0.02  |
| 28 | 7 | 0.00 | 0.01  | 0.00  | 0.00  | -0.02 | 0.01  | 0.01  | 0.00  | 0.00  |
| 29 | 1 | 0.01 | 0.03  | 0.02  | 0.00  | -0.07 | 0.04  | -0.04 | -0.18 | -0.45 |
| 30 | 6 | 0.00 | -0.01 | 0.00  | 0.00  | 0.04  | -0.02 | 0.01  | 0.01  | 0.01  |
| 31 | 1 | 0.00 | 0.01  | -0.01 | 0.00  | -0.07 | 0.03  | 0.01  | 0.01  | 0.01  |
| 32 | 6 | 0.00 | 0.00  | 0.00  | 0.00  | 0.02  | -0.01 | -0.01 | 0.00  | 0.00  |
| 33 | 1 | 0.00 | -0.03 | 0.01  | 0.00  | 0.08  | -0.04 | 0.00  | 0.00  | -0.02 |
| 34 | 6 | 0.00 | 0.02  | -0.01 | 0.00  | -0.08 | 0.04  | -0.01 | 0.00  | 0.00  |
| 35 | 1 | 0.00 | -0.06 | 0.03  | 0.01  | 0.29  | -0.14 | -0.01 | 0.01  | -0.01 |
| 36 | 1 | 0.03 | -0.05 | 0.01  | 0.00  | -0.01 | 0.00  | 0.00  | -0.02 | 0.00  |

49

50

51

A

A

A

|                |          |          |          |
|----------------|----------|----------|----------|
| Frequencies -- | 866.0874 | 888.3743 | 911.6112 |
| Red. masses -- | 3.6798   | 1.1975   | 6.5056   |
| Frc consts --  | 1.6263   | 0.5568   | 3.1853   |
| IR Inten --    | 2.5492   | 14.3651  | 5.5548   |
| Raman Activ -- | 0.8781   | 0.2935   | 3.6509   |
| Depolar (P) -- | 0.7452   | 0.7301   | 0.7315   |
| Depolar (U) -- | 0.8540   | 0.8440   | 0.8449   |

| Atom | AN | X     | Y     | Z     | X     | Y     | Z     | X     | Y     | Z     |
|------|----|-------|-------|-------|-------|-------|-------|-------|-------|-------|
| 1    | 8  | 0.00  | 0.00  | 0.00  | 0.00  | 0.00  | 0.00  | 0.00  | 0.00  | 0.01  |
| 2    | 1  | -0.03 | -0.04 | -0.02 | 0.00  | 0.00  | 0.00  | 0.06  | 0.04  | 0.01  |
| 3    | 1  | 0.01  | -0.01 | 0.01  | 0.00  | 0.00  | 0.00  | -0.06 | -0.03 | -0.04 |
| 4    | 6  | 0.01  | 0.06  | 0.21  | 0.00  | 0.00  | 0.00  | 0.05  | 0.22  | -0.07 |
| 5    | 6  | 0.00  | -0.03 | -0.19 | 0.00  | 0.01  | 0.00  | 0.01  | 0.30  | -0.04 |
| 6    | 6  | 0.02  | -0.03 | -0.09 | 0.00  | 0.00  | 0.00  | 0.12  | -0.07 | 0.03  |
| 7    | 6  | -0.07 | -0.01 | -0.19 | 0.00  | 0.00  | 0.00  | -0.08 | -0.08 | 0.10  |
| 8    | 6  | 0.00  | 0.07  | 0.20  | 0.00  | 0.00  | 0.00  | -0.05 | 0.24  | -0.09 |
| 9    | 6  | -0.01 | -0.04 | 0.04  | 0.00  | 0.00  | 0.00  | 0.00  | -0.17 | 0.08  |
| 10   | 6  | 0.00  | -0.01 | -0.05 | 0.00  | 0.00  | 0.00  | 0.02  | -0.01 | 0.00  |
| 11   | 1  | 0.03  | 0.04  | 0.25  | 0.00  | 0.00  | 0.00  | -0.05 | -0.17 | 0.00  |
| 12   | 8  | 0.01  | 0.01  | 0.05  | 0.00  | 0.00  | 0.00  | -0.15 | 0.05  | 0.04  |
| 13   | 8  | 0.02  | -0.02 | 0.03  | 0.00  | 0.00  | 0.00  | 0.12  | -0.17 | -0.05 |
| 14   | 6  | -0.01 | -0.02 | -0.10 | 0.00  | 0.00  | 0.00  | -0.13 | -0.08 | 0.03  |
| 15   | 6  | 0.06  | -0.03 | -0.17 | 0.00  | 0.00  | 0.00  | 0.07  | -0.02 | 0.07  |
| 16   | 8  | -0.02 | 0.02  | 0.00  | 0.00  | -0.01 | 0.00  | 0.02  | 0.03  | -0.03 |
| 17   | 8  | 0.02  | 0.02  | 0.01  | 0.00  | 0.00  | 0.00  | -0.02 | 0.03  | -0.02 |
| 18   | 1  | 0.00  | 0.17  | 0.74  | 0.00  | 0.01  | -0.01 | 0.03  | 0.36  | -0.09 |
| 19   | 1  | 0.05  | -0.05 | 0.04  | 0.00  | 0.00  | 0.00  | 0.19  | -0.23 | -0.26 |
| 20   | 1  | -0.01 | 0.06  | 0.31  | 0.00  | 0.00  | 0.00  | 0.02  | -0.18 | 0.02  |
| 21   | 8  | -0.01 | 0.01  | 0.04  | 0.00  | 0.00  | 0.00  | 0.12  | 0.01  | 0.03  |
| 22   | 8  | -0.02 | -0.02 | 0.03  | 0.00  | 0.00  | 0.00  | -0.10 | -0.16 | -0.03 |
| 23   | 1  | 0.01  | -0.03 | -0.05 | 0.00  | 0.00  | 0.00  | -0.26 | -0.28 | -0.06 |
| 24   | 8  | 0.00  | 0.00  | 0.00  | 0.00  | 0.00  | 0.00  | 0.00  | 0.00  | 0.00  |
| 25   | 1  | 0.04  | -0.01 | 0.02  | 0.00  | 0.00  | 0.00  | 0.05  | -0.01 | 0.02  |
| 26   | 7  | 0.00  | 0.00  | 0.00  | 0.00  | -0.02 | 0.01  | 0.00  | 0.00  | 0.00  |
| 27   | 1  | -0.01 | -0.01 | 0.01  | 0.01  | 0.36  | -0.18 | 0.01  | -0.05 | 0.02  |
| 28   | 7  | 0.00  | 0.00  | 0.00  | 0.00  | -0.01 | 0.00  | -0.01 | 0.00  | 0.00  |
| 29   | 1  | 0.02  | 0.02  | -0.03 | 0.00  | 0.00  | 0.00  | -0.01 | 0.08  | -0.02 |
| 30   | 6  | 0.00  | 0.00  | 0.00  | 0.00  | -0.06 | 0.03  | 0.00  | 0.00  | 0.00  |
| 31   | 1  | 0.00  | 0.02  | -0.01 | 0.01  | 0.42  | -0.21 | 0.01  | 0.00  | -0.01 |
| 32   | 6  | 0.00  | 0.00  | 0.00  | 0.00  | -0.04 | 0.02  | 0.00  | 0.00  | 0.00  |
| 33   | 1  | 0.00  | 0.01  | -0.01 | 0.01  | 0.32  | -0.15 | 0.00  | -0.03 | 0.02  |
| 34   | 6  | 0.00  | 0.01  | 0.00  | 0.00  | 0.09  | -0.05 | 0.00  | -0.01 | 0.00  |
| 35   | 1  | 0.00  | -0.03 | 0.02  | -0.01 | -0.62 | 0.30  | -0.01 | 0.04  | -0.02 |
| 36   | 1  | 0.01  | 0.00  | 0.00  | 0.00  | 0.00  | 0.00  | 0.00  | 0.02  | 0.00  |

52

53

54

|                | A        |       |       | A        |       |       | A        |       |       |       |
|----------------|----------|-------|-------|----------|-------|-------|----------|-------|-------|-------|
| Frequencies -- | 923.1983 |       |       | 940.8096 |       |       | 959.6346 |       |       |       |
| Red. masses -- | 1.3430   |       |       | 6.3520   |       |       | 3.0356   |       |       |       |
| Frc consts --  | 0.6744   |       |       | 3.3126   |       |       | 1.6470   |       |       |       |
| IR Inten --    | 8.2741   |       |       | 3.2581   |       |       | 38.6616  |       |       |       |
| Raman Activ -- | 0.1079   |       |       | 5.3334   |       |       | 2.2040   |       |       |       |
| Depolar (P) -- | 0.5557   |       |       | 0.7455   |       |       | 0.3234   |       |       |       |
| Depolar (U) -- | 0.7144   |       |       | 0.8542   |       |       | 0.4887   |       |       |       |
| Atom           | AN       | X     | Y     | Z        | X     | Y     | Z        | X     | Y     | Z     |
| 1              | 8        | 0.00  | 0.00  | 0.00     | 0.00  | 0.00  | 0.00     | 0.00  | 0.00  | 0.00  |
| 2              | 1        | 0.00  | 0.00  | 0.00     | 0.00  | 0.00  | 0.00     | 0.00  | 0.00  | 0.00  |
| 3              | 1        | 0.00  | 0.00  | 0.00     | 0.00  | 0.00  | 0.00     | 0.00  | 0.00  | 0.00  |
| 4              | 6        | 0.00  | 0.00  | 0.00     | 0.00  | 0.00  | 0.00     | 0.00  | 0.00  | 0.00  |
| 5              | 6        | 0.00  | 0.00  | 0.00     | 0.00  | 0.00  | 0.00     | 0.00  | 0.00  | -0.01 |
| 6              | 6        | 0.00  | 0.00  | 0.00     | 0.00  | 0.00  | 0.00     | 0.00  | 0.00  | 0.00  |
| 7              | 6        | 0.00  | 0.00  | 0.00     | 0.00  | 0.00  | 0.00     | 0.00  | 0.00  | 0.00  |
| 8              | 6        | 0.00  | 0.00  | 0.00     | 0.00  | 0.00  | 0.00     | 0.00  | 0.00  | 0.00  |
| 9              | 6        | 0.00  | 0.00  | 0.00     | 0.00  | -0.01 | -0.01    | 0.00  | 0.00  | 0.00  |
| 10             | 6        | 0.00  | 0.00  | 0.00     | 0.00  | 0.00  | 0.00     | 0.00  | 0.00  | 0.00  |
| 11             | 1        | 0.00  | 0.00  | 0.00     | 0.00  | 0.00  | 0.00     | 0.00  | 0.00  | 0.00  |
| 12             | 8        | 0.00  | 0.00  | 0.00     | 0.00  | 0.00  | 0.00     | 0.00  | 0.00  | 0.00  |
| 13             | 8        | 0.00  | 0.00  | 0.00     | 0.00  | 0.00  | 0.00     | 0.00  | 0.00  | 0.00  |
| 14             | 6        | 0.00  | 0.00  | 0.00     | 0.00  | 0.00  | 0.00     | 0.00  | 0.00  | 0.00  |
| 15             | 6        | 0.00  | 0.00  | 0.00     | 0.00  | 0.00  | 0.00     | 0.00  | 0.00  | 0.00  |
| 16             | 8        | 0.00  | 0.00  | 0.00     | 0.00  | 0.00  | -0.01    | -0.01 | 0.00  | 0.01  |
| 17             | 8        | 0.00  | 0.00  | 0.00     | -0.01 | 0.01  | 0.02     | 0.02  | 0.00  | -0.01 |
| 18             | 1        | 0.00  | 0.00  | 0.00     | 0.00  | 0.00  | 0.00     | 0.00  | 0.00  | 0.00  |
| 19             | 1        | 0.00  | 0.00  | 0.00     | 0.00  | 0.00  | 0.00     | 0.00  | 0.00  | 0.01  |
| 20             | 1        | 0.00  | 0.00  | 0.00     | 0.00  | 0.00  | 0.00     | 0.00  | 0.00  | 0.01  |
| 21             | 8        | 0.00  | 0.00  | 0.00     | 0.00  | 0.00  | 0.00     | 0.00  | 0.00  | 0.00  |
| 22             | 8        | 0.00  | 0.00  | 0.00     | 0.00  | 0.00  | 0.00     | 0.00  | 0.00  | 0.00  |
| 23             | 1        | 0.00  | 0.00  | 0.00     | 0.00  | 0.00  | 0.00     | 0.00  | 0.00  | 0.00  |
| 24             | 8        | 0.00  | 0.00  | 0.00     | 0.00  | 0.00  | 0.00     | 0.00  | 0.00  | 0.00  |
| 25             | 1        | 0.01  | 0.00  | 0.00     | 0.01  | 0.00  | 0.00     | 0.00  | 0.00  | 0.00  |
| 26             | 7        | 0.00  | 0.01  | -0.01    | 0.19  | 0.00  | 0.00     | 0.15  | 0.07  | 0.14  |
| 27             | 1        | 0.00  | 0.00  | 0.00     | 0.05  | 0.10  | 0.20     | 0.32  | -0.03 | -0.05 |
| 28             | 7        | 0.00  | 0.01  | -0.01    | 0.15  | 0.02  | 0.04     | -0.19 | 0.06  | 0.12  |
| 29             | 1        | 0.00  | 0.04  | -0.02    | -0.01 | 0.00  | -0.01    | 0.00  | -0.01 | -0.02 |
| 30             | 6        | 0.00  | -0.12 | 0.06     | -0.02 | 0.14  | 0.29     | -0.11 | -0.07 | -0.14 |
| 31             | 1        | 0.01  | 0.74  | -0.36    | 0.14  | 0.13  | 0.28     | 0.27  | -0.08 | -0.20 |
| 32             | 6        | 0.00  | 0.09  | -0.04    | -0.42 | -0.01 | -0.03    | 0.02  | -0.03 | -0.06 |
| 33             | 1        | -0.01 | -0.39 | 0.17     | -0.44 | 0.03  | 0.03     | -0.03 | 0.23  | 0.54  |
| 34             | 6        | 0.00  | -0.05 | 0.02     | 0.07  | -0.16 | -0.33    | 0.10  | -0.05 | -0.10 |
| 35             | 1        | 0.01  | 0.28  | -0.13    | 0.24  | -0.15 | -0.29    | -0.44 | -0.10 | -0.25 |
| 36             | 1        | 0.00  | 0.00  | 0.00     | 0.00  | 0.00  | 0.00     | 0.00  | 0.00  | 0.00  |

|                | 55<br>A  |      |       | 56<br>A   |       |       | 57<br>A   |       |       |       |
|----------------|----------|------|-------|-----------|-------|-------|-----------|-------|-------|-------|
| Frequencies -- | 984.6249 |      |       | 1024.9010 |       |       | 1044.5780 |       |       |       |
| Red. masses -- | 1.3972   |      |       | 1.3520    |       |       | 1.0813    |       |       |       |
| Frc consts --  | 0.7981   |      |       | 0.8367    |       |       | 0.6951    |       |       |       |
| IR Inten --    | 0.2426   |      |       | 3.0796    |       |       | 100.9580  |       |       |       |
| Raman Activ -- | 0.0845   |      |       | 0.1433    |       |       | 1.3168    |       |       |       |
| Depolar (P) -- | 0.6363   |      |       | 0.3085    |       |       | 0.7298    |       |       |       |
| Depolar (U) -- | 0.7777   |      |       | 0.4715    |       |       | 0.8438    |       |       |       |
| Atom           | AN       | X    | Y     | Z         | X     | Y     | Z         | X     | Y     | Z     |
| 1              | 8        | 0.00 | 0.00  | 0.00      | 0.00  | 0.00  | 0.00      | 0.01  | 0.02  | -0.02 |
| 2              | 1        | 0.01 | 0.01  | 0.00      | 0.02  | 0.02  | 0.01      | -0.29 | -0.27 | -0.15 |
| 3              | 1        | 0.00 | 0.00  | 0.00      | -0.01 | 0.00  | -0.01     | 0.15  | 0.02  | 0.12  |
| 4              | 6        | 0.00 | -0.01 | -0.04     | 0.00  | 0.00  | -0.02     | 0.00  | 0.00  | 0.01  |
| 5              | 6        | 0.00 | 0.00  | 0.00      | 0.00  | -0.01 | -0.01     | 0.00  | 0.01  | 0.00  |

|    |   |       |       |       |       |       |       |       |       |       |
|----|---|-------|-------|-------|-------|-------|-------|-------|-------|-------|
| 6  | 6 | 0.00  | 0.01  | 0.11  | 0.00  | 0.01  | 0.10  | 0.00  | 0.00  | 0.00  |
| 7  | 6 | 0.01  | 0.00  | 0.03  | 0.00  | 0.00  | 0.01  | 0.01  | -0.02 | 0.03  |
| 8  | 6 | 0.00  | 0.01  | 0.04  | 0.00  | -0.01 | -0.01 | 0.00  | 0.01  | 0.00  |
| 9  | 6 | 0.00  | 0.00  | 0.00  | 0.00  | 0.00  | 0.00  | 0.00  | -0.01 | 0.00  |
| 10 | 6 | 0.00  | 0.01  | 0.02  | 0.00  | -0.02 | -0.12 | 0.00  | 0.00  | 0.00  |
| 11 | 1 | -0.05 | -0.15 | -0.63 | -0.05 | -0.13 | -0.57 | 0.01  | 0.00  | -0.04 |
| 12 | 8 | 0.00  | 0.00  | -0.01 | 0.00  | 0.00  | 0.00  | -0.01 | 0.01  | -0.01 |
| 13 | 8 | 0.00  | 0.00  | 0.00  | 0.00  | 0.00  | 0.00  | -0.01 | 0.00  | -0.04 |
| 14 | 6 | 0.00  | -0.02 | -0.13 | 0.00  | 0.02  | 0.07  | 0.00  | -0.01 | 0.00  |
| 15 | 6 | 0.01  | 0.00  | -0.03 | 0.00  | 0.00  | 0.01  | 0.00  | 0.00  | 0.00  |
| 16 | 8 | 0.00  | 0.00  | 0.00  | 0.00  | 0.00  | 0.00  | 0.00  | 0.00  | 0.00  |
| 17 | 8 | 0.00  | 0.00  | 0.00  | 0.00  | 0.00  | 0.00  | 0.00  | 0.00  | 0.00  |
| 18 | 1 | 0.00  | -0.01 | -0.09 | 0.01  | 0.14  | 0.64  | 0.00  | 0.02  | 0.03  |
| 19 | 1 | 0.00  | 0.00  | -0.01 | 0.00  | 0.01  | -0.05 | 0.12  | -0.11 | 0.86  |
| 20 | 1 | -0.03 | 0.18  | 0.71  | 0.01  | -0.09 | -0.43 | 0.02  | -0.02 | -0.01 |
| 21 | 8 | 0.00  | 0.00  | 0.01  | 0.00  | 0.00  | 0.00  | 0.00  | 0.00  | 0.00  |
| 22 | 8 | 0.00  | 0.00  | 0.00  | 0.00  | 0.01  | 0.00  | 0.00  | -0.01 | 0.00  |
| 23 | 1 | 0.01  | 0.01  | 0.00  | -0.01 | 0.00  | 0.00  | 0.00  | -0.01 | 0.00  |
| 24 | 8 | 0.00  | 0.00  | 0.00  | 0.00  | 0.00  | 0.00  | 0.01  | 0.00  | 0.01  |
| 25 | 1 | 0.00  | 0.00  | 0.00  | 0.00  | 0.00  | 0.00  | -0.04 | 0.01  | -0.03 |
| 26 | 7 | 0.00  | 0.00  | 0.00  | 0.00  | 0.00  | 0.00  | 0.00  | 0.00  | 0.00  |
| 27 | 1 | 0.00  | 0.00  | 0.00  | 0.00  | 0.00  | 0.00  | 0.00  | 0.00  | 0.00  |
| 28 | 7 | 0.00  | 0.00  | 0.00  | 0.00  | 0.00  | 0.00  | 0.00  | 0.00  | 0.00  |
| 29 | 1 | 0.00  | 0.00  | 0.00  | 0.00  | -0.01 | 0.00  | 0.00  | -0.03 | 0.01  |
| 30 | 6 | 0.00  | 0.00  | 0.00  | 0.00  | 0.00  | 0.00  | 0.00  | 0.00  | 0.00  |
| 31 | 1 | 0.00  | 0.00  | 0.00  | 0.00  | 0.00  | 0.00  | 0.00  | 0.00  | 0.00  |
| 32 | 6 | 0.00  | 0.00  | 0.00  | 0.00  | 0.00  | 0.00  | 0.00  | 0.00  | 0.00  |
| 33 | 1 | 0.00  | 0.00  | 0.00  | 0.00  | 0.00  | 0.00  | 0.00  | 0.00  | 0.00  |
| 34 | 6 | 0.00  | 0.00  | 0.00  | 0.00  | 0.00  | 0.00  | 0.00  | 0.00  | 0.00  |
| 35 | 1 | 0.00  | 0.00  | 0.00  | 0.00  | 0.00  | 0.00  | 0.00  | 0.00  | 0.00  |
| 36 | 1 | 0.00  | 0.00  | 0.00  | 0.00  | 0.00  | 0.00  | 0.00  | -0.02 | 0.00  |

58

59

60

A

A

A

|                |           |           |           |
|----------------|-----------|-----------|-----------|
| Frequencies -- | 1056.2368 | 1069.4986 | 1079.2017 |
| Red. masses -- | 1.0841    | 1.3967    | 1.5100    |
| Frc consts --  | 0.7126    | 0.9412    | 1.0362    |
| IR Inten --    | 79.8786   | 12.1252   | 101.9325  |
| Raman Activ -- | 0.3958    | 2.7375    | 1.6672    |
| Depolar (P) -- | 0.5790    | 0.5858    | 0.7481    |
| Depolar (U) -- | 0.7334    | 0.7388    | 0.8559    |

| Atom | AN | X     | Y     | Z     | X     | Y    | Z    | X     | Y     | Z     |
|------|----|-------|-------|-------|-------|------|------|-------|-------|-------|
| 1    | 8  | 0.00  | 0.00  | 0.00  | 0.00  | 0.00 | 0.00 | 0.00  | 0.00  | 0.00  |
| 2    | 1  | -0.01 | -0.01 | 0.00  | 0.00  | 0.00 | 0.00 | -0.01 | -0.01 | 0.00  |
| 3    | 1  | 0.00  | 0.00  | 0.00  | 0.00  | 0.00 | 0.00 | 0.00  | 0.00  | 0.00  |
| 4    | 6  | 0.00  | 0.00  | 0.00  | 0.00  | 0.00 | 0.00 | 0.00  | 0.01  | 0.00  |
| 5    | 6  | 0.00  | 0.00  | 0.00  | 0.00  | 0.00 | 0.00 | -0.01 | 0.00  | 0.00  |
| 6    | 6  | 0.00  | 0.00  | 0.00  | 0.00  | 0.00 | 0.00 | 0.00  | -0.01 | 0.00  |
| 7    | 6  | 0.00  | 0.00  | 0.00  | 0.00  | 0.00 | 0.00 | 0.00  | 0.00  | 0.00  |
| 8    | 6  | 0.00  | 0.01  | 0.00  | 0.00  | 0.00 | 0.00 | 0.00  | 0.00  | 0.00  |
| 9    | 6  | 0.00  | 0.02  | -0.01 | 0.00  | 0.00 | 0.00 | -0.01 | 0.00  | -0.01 |
| 10   | 6  | 0.00  | 0.00  | 0.00  | 0.00  | 0.00 | 0.00 | 0.00  | 0.00  | 0.00  |
| 11   | 1  | 0.00  | 0.00  | 0.00  | 0.00  | 0.00 | 0.00 | -0.01 | -0.02 | 0.01  |
| 12   | 8  | 0.00  | 0.00  | 0.00  | 0.00  | 0.00 | 0.00 | 0.00  | 0.00  | 0.00  |
| 13   | 8  | 0.00  | 0.00  | 0.00  | 0.00  | 0.00 | 0.00 | 0.00  | 0.00  | 0.00  |
| 14   | 6  | 0.00  | 0.00  | 0.00  | 0.00  | 0.00 | 0.00 | 0.01  | 0.01  | 0.00  |
| 15   | 6  | 0.00  | 0.00  | 0.00  | 0.00  | 0.00 | 0.00 | 0.00  | 0.00  | 0.00  |
| 16   | 8  | 0.00  | -0.02 | 0.00  | 0.00  | 0.00 | 0.00 | 0.00  | 0.00  | -0.01 |
| 17   | 8  | -0.01 | -0.04 | 0.03  | -0.01 | 0.00 | 0.00 | 0.00  | 0.01  | 0.01  |
| 18   | 1  | 0.00  | 0.00  | 0.00  | 0.00  | 0.00 | 0.00 | 0.00  | 0.00  | 0.00  |
| 19   | 1  | 0.00  | 0.00  | 0.03  | 0.00  | 0.00 | 0.00 | 0.00  | 0.00  | 0.01  |

|    |   |       |       |       |       |       |       |       |       |       |
|----|---|-------|-------|-------|-------|-------|-------|-------|-------|-------|
| 20 | 1 | 0.01  | -0.01 | 0.00  | 0.00  | 0.00  | 0.00  | -0.01 | 0.02  | 0.00  |
| 21 | 8 | 0.00  | 0.00  | 0.00  | 0.00  | 0.00  | 0.00  | 0.00  | 0.00  | 0.00  |
| 22 | 8 | 0.00  | 0.00  | 0.00  | 0.00  | 0.00  | 0.00  | 0.00  | 0.00  | 0.00  |
| 23 | 1 | 0.01  | 0.00  | 0.00  | 0.00  | 0.00  | 0.00  | -0.01 | 0.00  | 0.00  |
| 24 | 8 | 0.00  | 0.00  | 0.00  | 0.00  | 0.00  | 0.00  | 0.00  | 0.00  | 0.00  |
| 25 | 1 | 0.08  | -0.01 | 0.03  | 0.00  | 0.00  | 0.00  | 0.00  | 0.00  | 0.00  |
| 26 | 7 | 0.00  | 0.00  | 0.00  | -0.09 | -0.02 | -0.05 | 0.01  | 0.02  | 0.04  |
| 27 | 1 | 0.01  | 0.04  | -0.03 | -0.20 | 0.04  | 0.07  | -0.04 | 0.05  | 0.10  |
| 28 | 7 | 0.00  | -0.03 | 0.01  | 0.05  | 0.00  | 0.01  | 0.09  | -0.05 | -0.11 |
| 29 | 1 | 0.05  | 0.85  | -0.50 | 0.01  | 0.04  | 0.02  | 0.00  | -0.03 | 0.01  |
| 30 | 6 | 0.00  | 0.01  | 0.00  | 0.07  | -0.03 | -0.07 | 0.01  | 0.01  | 0.03  |
| 31 | 1 | -0.01 | -0.03 | 0.02  | 0.45  | -0.07 | -0.12 | -0.38 | 0.05  | 0.08  |
| 32 | 6 | 0.00  | 0.00  | 0.00  | -0.05 | 0.04  | 0.07  | 0.05  | 0.03  | 0.06  |
| 33 | 1 | 0.00  | 0.02  | -0.02 | -0.11 | 0.34  | 0.72  | 0.03  | 0.17  | 0.37  |
| 34 | 6 | 0.00  | 0.00  | 0.00  | -0.01 | -0.01 | -0.01 | -0.07 | -0.02 | -0.04 |
| 35 | 1 | -0.03 | 0.01  | -0.01 | 0.21  | 0.02  | 0.04  | -0.75 | -0.09 | -0.21 |
| 36 | 1 | -0.01 | -0.04 | -0.01 | 0.00  | 0.00  | 0.00  | 0.00  | 0.00  | 0.00  |

61

62

63

A

A

A

Frequencies -- 1096.7671 1154.7690 1172.8348

Red. masses -- 3.5516 3.7316 2.6700

Frc consts -- 2.5171 2.9318 2.1639

IR Inten -- 29.6736 64.9008 76.8147

Raman Activ -- 26.0289 1.9865 9.6927

Depolar (P) -- 0.0707 0.0378 0.2282

Depolar (U) -- 0.1320 0.0728 0.3716

| Atom | AN | X     | Y     | Z     | X     | Y     | Z     | X     | Y     | Z     |
|------|----|-------|-------|-------|-------|-------|-------|-------|-------|-------|
| 1    | 8  | 0.00  | 0.00  | 0.00  | 0.00  | 0.00  | 0.00  | 0.00  | 0.00  | 0.00  |
| 2    | 1  | 0.02  | 0.02  | 0.01  | 0.01  | 0.02  | 0.01  | -0.01 | -0.01 | 0.00  |
| 3    | 1  | -0.01 | 0.00  | -0.01 | -0.01 | 0.00  | -0.01 | 0.01  | 0.00  | 0.01  |
| 4    | 6  | 0.04  | -0.08 | 0.01  | -0.09 | -0.16 | 0.04  | 0.04  | 0.05  | -0.01 |
| 5    | 6  | 0.20  | -0.01 | -0.01 | 0.14  | -0.04 | 0.00  | 0.19  | 0.03  | -0.02 |
| 6    | 6  | -0.05 | 0.25  | -0.03 | -0.09 | -0.06 | 0.00  | -0.08 | -0.01 | 0.00  |
| 7    | 6  | 0.00  | -0.03 | -0.02 | 0.02  | -0.06 | -0.01 | -0.01 | 0.02  | 0.01  |
| 8    | 6  | 0.05  | 0.07  | -0.01 | -0.08 | 0.15  | -0.04 | 0.05  | -0.07 | 0.03  |
| 9    | 6  | 0.02  | 0.02  | 0.04  | 0.05  | 0.03  | 0.04  | 0.06  | 0.02  | 0.06  |
| 10   | 6  | -0.09 | 0.00  | -0.01 | 0.20  | -0.01 | 0.00  | 0.01  | 0.05  | -0.01 |
| 11   | 1  | 0.39  | 0.48  | -0.18 | -0.51 | -0.27 | 0.10  | -0.58 | -0.25 | 0.11  |
| 12   | 8  | 0.01  | 0.00  | 0.00  | 0.06  | 0.01  | -0.02 | -0.01 | 0.00  | 0.00  |
| 13   | 8  | -0.02 | 0.04  | 0.01  | -0.04 | 0.08  | 0.02  | 0.01  | -0.03 | -0.01 |
| 14   | 6  | -0.07 | -0.24 | 0.04  | -0.09 | 0.08  | -0.01 | -0.05 | -0.04 | 0.01  |
| 15   | 6  | 0.01  | 0.06  | 0.01  | 0.05  | 0.13  | -0.01 | -0.05 | -0.14 | 0.00  |
| 16   | 8  | -0.04 | 0.03  | 0.05  | -0.03 | 0.02  | 0.03  | -0.04 | 0.02  | 0.04  |
| 17   | 8  | -0.05 | -0.03 | -0.07 | -0.05 | -0.03 | -0.06 | -0.06 | -0.04 | -0.08 |
| 18   | 1  | -0.11 | -0.03 | 0.04  | 0.22  | -0.06 | 0.01  | 0.02  | 0.43  | -0.10 |
| 19   | 1  | 0.00  | 0.02  | -0.07 | 0.00  | 0.04  | -0.03 | 0.01  | -0.03 | 0.04  |
| 20   | 1  | 0.28  | -0.46 | 0.12  | -0.46 | 0.31  | -0.11 | -0.26 | 0.08  | -0.02 |
| 21   | 8  | 0.01  | 0.00  | 0.00  | 0.08  | -0.02 | 0.03  | -0.06 | 0.01  | -0.02 |
| 22   | 8  | -0.04 | -0.04 | -0.01 | -0.09 | -0.11 | -0.02 | 0.10  | 0.10  | 0.03  |
| 23   | 1  | 0.06  | 0.03  | 0.02  | 0.17  | 0.09  | 0.06  | -0.27 | -0.18 | -0.08 |
| 24   | 8  | 0.00  | 0.00  | 0.00  | 0.00  | 0.00  | 0.00  | 0.00  | 0.00  | 0.00  |
| 25   | 1  | 0.02  | 0.00  | 0.01  | 0.02  | 0.00  | 0.01  | 0.03  | 0.00  | 0.01  |
| 26   | 7  | 0.00  | 0.00  | 0.00  | 0.01  | -0.01 | -0.01 | -0.03 | 0.00  | 0.00  |
| 27   | 1  | -0.01 | 0.00  | 0.01  | 0.02  | -0.02 | -0.04 | -0.11 | 0.05  | 0.10  |
| 28   | 7  | 0.01  | -0.01 | -0.01 | 0.00  | 0.00  | 0.00  | 0.00  | 0.01  | 0.02  |
| 29   | 1  | -0.05 | -0.06 | -0.04 | -0.03 | -0.03 | 0.00  | -0.04 | 0.03  | -0.01 |
| 30   | 6  | 0.01  | 0.00  | 0.01  | 0.01  | 0.01  | 0.01  | -0.02 | 0.01  | 0.01  |
| 31   | 1  | -0.04 | 0.01  | 0.02  | 0.04  | 0.00  | 0.01  | -0.18 | 0.02  | 0.04  |
| 32   | 6  | 0.01  | 0.00  | 0.01  | 0.00  | 0.00  | 0.01  | 0.04  | -0.01 | -0.01 |
| 33   | 1  | 0.01  | 0.02  | 0.05  | 0.00  | 0.00  | 0.00  | 0.04  | 0.02  | 0.05  |

|                |   |           |       |       |       |           |       |       |           |           |       |       |
|----------------|---|-----------|-------|-------|-------|-----------|-------|-------|-----------|-----------|-------|-------|
| 34             | 6 | -0.01     | 0.00  | -0.01 | -0.01 | 0.00      | 0.00  | 0.03  | -0.02     | -0.04     |       |       |
| 35             | 1 | -0.11     | -0.01 | -0.03 | -0.08 | -0.01     | -0.02 | 0.09  | -0.01     | -0.03     |       |       |
| 36             | 1 | 0.00      | 0.00  | 0.00  | 0.00  | 0.00      | 0.00  | 0.00  | 0.01      | 0.00      |       |       |
|                |   | 64        |       |       | 65    |           |       | 66    |           |           |       |       |
|                |   | A         |       |       | A     |           |       | A     |           |           |       |       |
| Frequencies -- |   | 1177.9496 |       |       |       | 1193.9519 |       |       | 1217.3571 |           |       |       |
| Red. masses -- |   | 1.7934    |       |       |       | 1.4350    |       |       | 3.9718    |           |       |       |
| Frc consts --  |   | 1.4661    |       |       |       | 1.2053    |       |       | 3.4680    |           |       |       |
| IR Inten --    |   | 58.3831   |       |       |       | 11.9914   |       |       | 52.6600   |           |       |       |
| Raman Activ -- |   | 10.3177   |       |       |       | 8.0188    |       |       | 42.0062   |           |       |       |
| Depolar (P) -- |   | 0.1254    |       |       |       | 0.4952    |       |       | 0.0595    |           |       |       |
| Depolar (U) -- |   | 0.2228    |       |       |       | 0.6624    |       |       | 0.1123    |           |       |       |
| Atom AN        |   | X         | Y     | Z     |       | X         | Y     | Z     |           | X         | Y     | Z     |
| 1              | 8 | 0.00      | 0.00  | 0.00  |       | 0.00      | 0.00  | 0.00  |           | 0.00      | 0.00  | 0.00  |
| 2              | 1 | 0.00      | 0.00  | 0.00  |       | 0.01      | 0.01  | 0.01  |           | 0.00      | 0.00  | 0.00  |
| 3              | 1 | 0.00      | 0.00  | 0.00  |       | -0.01     | 0.00  | -0.01 |           | 0.00      | 0.00  | 0.00  |
| 4              | 6 | 0.01      | 0.01  | 0.00  |       | -0.07     | -0.07 | 0.02  |           | 0.00      | -0.02 | 0.00  |
| 5              | 6 | 0.03      | 0.01  | 0.00  |       | -0.06     | 0.01  | 0.00  |           | 0.03      | 0.00  | 0.00  |
| 6              | 6 | -0.01     | 0.00  | 0.00  |       | -0.02     | -0.04 | 0.01  |           | -0.01     | 0.01  | 0.00  |
| 7              | 6 | 0.00      | 0.00  | 0.00  |       | 0.01      | -0.05 | 0.00  |           | 0.00      | -0.01 | 0.00  |
| 8              | 6 | 0.01      | -0.02 | 0.01  |       | 0.02      | 0.01  | 0.00  |           | -0.02     | 0.03  | -0.01 |
| 9              | 6 | 0.01      | 0.00  | 0.01  |       | -0.02     | -0.02 | -0.01 |           | -0.01     | 0.00  | -0.01 |
| 10             | 6 | -0.01     | 0.01  | 0.00  |       | 0.01      | 0.08  | -0.01 |           | 0.02      | -0.01 | 0.00  |
| 11             | 1 | -0.11     | -0.05 | 0.02  |       | -0.10     | -0.09 | 0.03  |           | -0.02     | 0.00  | 0.00  |
| 12             | 8 | 0.00      | 0.00  | 0.00  |       | 0.03      | 0.01  | -0.01 |           | 0.01      | 0.00  | 0.00  |
| 13             | 8 | 0.00      | -0.01 | 0.00  |       | -0.02     | 0.05  | 0.01  |           | 0.00      | 0.01  | 0.00  |
| 14             | 6 | 0.00      | -0.01 | 0.00  |       | 0.05      | -0.04 | 0.01  |           | -0.01     | 0.00  | 0.00  |
| 15             | 6 | -0.01     | -0.03 | 0.00  |       | 0.00      | 0.02  | 0.00  |           | 0.00      | -0.02 | 0.00  |
| 16             | 8 | -0.01     | 0.00  | 0.00  |       | 0.01      | 0.00  | -0.01 |           | 0.00      | 0.00  | 0.00  |
| 17             | 8 | -0.01     | 0.00  | 0.00  |       | 0.02      | 0.01  | 0.02  |           | 0.00      | 0.00  | 0.00  |
| 18             | 1 | 0.00      | 0.11  | -0.03 |       | 0.04      | 0.83  | -0.17 |           | 0.02      | -0.07 | 0.01  |
| 19             | 1 | 0.00      | -0.01 | 0.00  |       | 0.02      | 0.01  | -0.03 |           | 0.00      | 0.00  | 0.00  |
| 20             | 1 | -0.03     | 0.00  | 0.00  |       | 0.40      | -0.25 | 0.07  |           | -0.03     | 0.01  | 0.00  |
| 21             | 8 | -0.02     | 0.00  | -0.01 |       | 0.00      | 0.00  | 0.00  |           | -0.01     | 0.00  | 0.00  |
| 22             | 8 | 0.02      | 0.02  | 0.01  |       | -0.01     | -0.01 | 0.00  |           | 0.02      | 0.01  | 0.01  |
| 23             | 1 | -0.06     | -0.04 | -0.02 |       | 0.03      | 0.02  | 0.00  |           | -0.11     | -0.09 | -0.03 |
| 24             | 8 | 0.00      | 0.00  | 0.00  |       | 0.00      | 0.00  | 0.00  |           | 0.00      | 0.00  | 0.00  |
| 25             | 1 | -0.01     | 0.00  | 0.00  |       | 0.00      | 0.00  | 0.00  |           | 0.00      | 0.00  | 0.00  |
| 26             | 7 | 0.11      | -0.02 | -0.03 |       | 0.00      | 0.00  | 0.01  |           | 0.07      | 0.12  | 0.25  |
| 27             | 1 | 0.34      | -0.16 | -0.32 |       | -0.01     | 0.00  | 0.01  |           | 0.00      | 0.19  | 0.39  |
| 28             | 7 | -0.02     | -0.03 | -0.07 |       | 0.00      | 0.00  | 0.00  |           | 0.14      | -0.08 | -0.16 |
| 29             | 1 | -0.01     | -0.05 | -0.05 |       | 0.01      | 0.00  | 0.01  |           | -0.03     | 0.00  | -0.02 |
| 30             | 6 | 0.08      | 0.00  | 0.00  |       | 0.00      | 0.00  | 0.00  |           | -0.06     | -0.10 | -0.21 |
| 31             | 1 | 0.64      | -0.05 | -0.08 |       | -0.02     | 0.00  | 0.00  |           | -0.29     | -0.10 | -0.21 |
| 32             | 6 | -0.11     | 0.03  | 0.06  |       | 0.00      | 0.00  | 0.00  |           | -0.18     | -0.02 | -0.04 |
| 33             | 1 | -0.10     | -0.10 | -0.21 |       | 0.00      | 0.00  | 0.01  |           | -0.22     | -0.02 | -0.05 |
| 34             | 6 | -0.10     | 0.05  | 0.10  |       | 0.00      | 0.00  | 0.00  |           | 0.00      | 0.06  | 0.11  |
| 35             | 1 | -0.41     | 0.02  | 0.04  |       | 0.02      | 0.00  | 0.01  |           | 0.51      | 0.12  | 0.27  |
| 36             | 1 | 0.00      | 0.00  | 0.00  |       | 0.00      | 0.00  | 0.00  |           | 0.00      | 0.00  | 0.00  |
|                |   | 67        |       |       |       | 68        |       |       |           | 69        |       |       |
|                |   | A         |       |       |       | A         |       |       |           | A         |       |       |
| Frequencies -- |   | 1224.4365 |       |       |       | 1256.0356 |       |       |           | 1315.4040 |       |       |
| Red. masses -- |   | 2.0248    |       |       |       | 1.7520    |       |       |           | 3.0264    |       |       |
| Frc consts --  |   | 1.7886    |       |       |       | 1.6285    |       |       |           | 3.0852    |       |       |
| IR Inten --    |   | 327.0681  |       |       |       | 0.9941    |       |       |           | 269.0708  |       |       |
| Raman Activ -- |   | 14.4206   |       |       |       | 0.9147    |       |       |           | 6.1299    |       |       |
| Depolar (P) -- |   | 0.2462    |       |       |       | 0.7474    |       |       |           | 0.3163    |       |       |
| Depolar (U) -- |   | 0.3952    |       |       |       | 0.8554    |       |       |           | 0.4806    |       |       |
| Atom AN        |   | X         | Y     | Z     |       | X         | Y     | Z     |           | X         | Y     | Z     |
| 1              | 8 | 0.00      | 0.00  | 0.00  |       | 0.00      | 0.00  | 0.00  |           | 0.00      | -0.01 | 0.00  |

|    |   |       |       |       |       |       |       |       |       |       |
|----|---|-------|-------|-------|-------|-------|-------|-------|-------|-------|
| 2  | 1 | 0.00  | -0.01 | 0.00  | 0.00  | 0.01  | 0.00  | 0.02  | 0.04  | 0.02  |
| 3  | 1 | 0.01  | 0.00  | 0.01  | 0.00  | 0.00  | 0.00  | 0.04  | 0.03  | 0.03  |
| 4  | 6 | 0.05  | 0.08  | -0.02 | -0.14 | -0.02 | 0.01  | -0.18 | -0.02 | 0.00  |
| 5  | 6 | 0.02  | -0.05 | 0.01  | 0.00  | 0.11  | -0.02 | 0.02  | -0.15 | 0.03  |
| 6  | 6 | -0.01 | 0.01  | 0.00  | 0.03  | -0.06 | 0.01  | 0.05  | 0.02  | 0.00  |
| 7  | 6 | -0.01 | 0.07  | 0.00  | 0.01  | -0.04 | 0.01  | 0.00  | 0.22  | 0.00  |
| 8  | 6 | 0.10  | -0.13 | 0.03  | 0.13  | -0.03 | 0.01  | 0.06  | 0.08  | -0.02 |
| 9  | 6 | 0.01  | 0.00  | 0.01  | 0.01  | -0.03 | 0.02  | 0.01  | 0.02  | 0.01  |
| 10 | 6 | -0.07 | 0.02  | 0.00  | 0.01  | -0.02 | 0.00  | 0.05  | -0.07 | 0.01  |
| 11 | 1 | -0.27 | -0.12 | 0.04  | 0.60  | 0.22  | -0.08 | 0.16  | 0.06  | -0.04 |
| 12 | 8 | -0.04 | -0.01 | 0.01  | 0.03  | 0.01  | -0.01 | -0.04 | -0.01 | 0.01  |
| 13 | 8 | 0.03  | -0.06 | -0.01 | -0.01 | 0.03  | 0.00  | 0.10  | -0.12 | -0.03 |
| 14 | 6 | 0.00  | -0.01 | 0.01  | -0.03 | -0.04 | 0.01  | -0.06 | 0.05  | -0.01 |
| 15 | 6 | 0.01  | 0.08  | 0.00  | -0.02 | -0.04 | 0.01  | 0.01  | 0.04  | 0.00  |
| 16 | 8 | -0.01 | 0.00  | 0.01  | 0.00  | 0.00  | 0.00  | -0.01 | 0.00  | 0.00  |
| 17 | 8 | -0.01 | 0.00  | -0.01 | -0.01 | 0.00  | -0.01 | -0.01 | -0.01 | -0.01 |
| 18 | 1 | -0.07 | 0.24  | -0.05 | 0.01  | 0.18  | -0.02 | 0.06  | 0.30  | -0.05 |
| 19 | 1 | -0.05 | 0.01  | 0.04  | -0.02 | 0.03  | 0.00  | -0.49 | 0.35  | 0.15  |
| 20 | 1 | -0.15 | 0.06  | -0.04 | -0.60 | 0.29  | -0.08 | 0.16  | -0.08 | 0.03  |
| 21 | 8 | 0.05  | 0.01  | 0.02  | -0.01 | 0.01  | -0.01 | -0.02 | -0.01 | -0.01 |
| 22 | 8 | -0.11 | -0.04 | -0.04 | 0.00  | 0.02  | 0.00  | 0.02  | -0.02 | 0.01  |
| 23 | 1 | 0.65  | 0.52  | 0.18  | 0.12  | 0.11  | 0.03  | -0.22 | -0.19 | -0.06 |
| 24 | 8 | 0.00  | 0.00  | 0.00  | 0.00  | 0.00  | 0.00  | 0.00  | 0.00  | 0.00  |
| 25 | 1 | 0.00  | 0.00  | 0.00  | 0.00  | 0.00  | 0.00  | 0.00  | 0.00  | 0.00  |
| 26 | 7 | 0.01  | 0.01  | 0.02  | 0.00  | 0.00  | 0.00  | -0.02 | 0.01  | 0.03  |
| 27 | 1 | 0.00  | 0.01  | 0.04  | 0.00  | 0.01  | 0.00  | -0.17 | 0.11  | 0.21  |
| 28 | 7 | 0.01  | -0.01 | -0.01 | 0.00  | 0.00  | 0.00  | -0.03 | -0.02 | -0.05 |
| 29 | 1 | -0.01 | -0.01 | 0.01  | 0.00  | 0.03  | 0.00  | 0.00  | -0.03 | 0.00  |
| 30 | 6 | 0.00  | -0.01 | -0.02 | 0.00  | 0.00  | 0.00  | -0.01 | 0.01  | 0.02  |
| 31 | 1 | -0.03 | -0.01 | -0.02 | 0.00  | 0.00  | 0.00  | 0.29  | -0.01 | -0.01 |
| 32 | 6 | -0.01 | 0.00  | 0.00  | 0.00  | 0.00  | 0.00  | 0.02  | 0.01  | 0.02  |
| 33 | 1 | -0.02 | 0.00  | 0.00  | 0.00  | 0.00  | 0.00  | 0.04  | -0.06 | -0.13 |
| 34 | 6 | 0.00  | 0.00  | 0.01  | 0.00  | 0.00  | 0.00  | 0.05  | -0.01 | -0.02 |
| 35 | 1 | 0.04  | 0.01  | 0.02  | 0.00  | 0.00  | 0.00  | -0.05 | -0.02 | -0.04 |
| 36 | 1 | 0.00  | 0.00  | 0.00  | 0.00  | 0.00  | 0.00  | -0.01 | 0.01  | 0.00  |

70

71

72

A

A

A

Frequencies -- 1318.9746 1341.5445 1353.1468

Red. masses -- 1.7804 4.8842 5.3691

Frc consts -- 1.8249 5.1791 5.7922

IR Inten -- 27.2007 144.9293 346.0570

Raman Activ -- 32.0379 23.0397 6.4257

Depolar (P) -- 0.1580 0.3407 0.0931

Depolar (U) -- 0.2729 0.5082 0.1704

| Atom | AN | X     | Y     | Z     | X     | Y     | Z     | X     | Y     | Z     |
|------|----|-------|-------|-------|-------|-------|-------|-------|-------|-------|
| 1    | 8  | 0.00  | 0.00  | 0.00  | 0.00  | 0.01  | 0.00  | 0.00  | 0.00  | 0.00  |
| 2    | 1  | -0.01 | -0.01 | -0.01 | -0.03 | -0.04 | -0.03 | -0.01 | 0.00  | -0.01 |
| 3    | 1  | -0.01 | -0.01 | -0.01 | -0.03 | -0.03 | -0.03 | 0.00  | 0.00  | 0.00  |
| 4    | 6  | 0.05  | 0.00  | 0.00  | -0.08 | 0.18  | -0.03 | -0.09 | 0.12  | -0.01 |
| 5    | 6  | -0.02 | 0.04  | -0.01 | -0.02 | -0.21 | 0.05  | -0.17 | -0.03 | -0.01 |
| 6    | 6  | -0.01 | -0.01 | 0.00  | 0.18  | 0.12  | -0.03 | 0.08  | -0.04 | 0.01  |
| 7    | 6  | 0.00  | -0.06 | 0.00  | 0.00  | -0.20 | 0.02  | 0.00  | -0.06 | 0.01  |
| 8    | 6  | -0.03 | -0.02 | 0.01  | 0.23  | 0.10  | -0.02 | -0.08 | -0.07 | 0.01  |
| 9    | 6  | 0.02  | 0.01  | 0.02  | -0.04 | 0.01  | -0.04 | 0.40  | 0.11  | 0.21  |
| 10   | 6  | -0.01 | 0.02  | 0.00  | -0.06 | -0.19 | 0.04  | 0.01  | -0.03 | 0.00  |
| 11   | 1  | -0.01 | -0.01 | 0.01  | -0.45 | -0.19 | 0.07  | 0.26  | 0.04  | -0.02 |
| 12   | 8  | 0.01  | 0.00  | 0.00  | 0.06  | 0.02  | -0.02 | 0.02  | 0.01  | -0.01 |
| 13   | 8  | -0.02 | 0.03  | 0.01  | -0.09 | 0.09  | 0.03  | -0.02 | 0.02  | 0.00  |
| 14   | 6  | 0.02  | -0.01 | 0.00  | -0.16 | 0.08  | -0.02 | 0.03  | 0.08  | -0.01 |
| 15   | 6  | 0.00  | -0.01 | 0.00  | -0.01 | -0.02 | 0.01  | 0.00  | 0.01  | -0.01 |

|    |   |       |       |       |       |       |       |       |       |       |
|----|---|-------|-------|-------|-------|-------|-------|-------|-------|-------|
| 16 | 8 | 0.00  | 0.00  | -0.01 | 0.01  | -0.01 | 0.00  | -0.07 | 0.02  | 0.03  |
| 17 | 8 | -0.01 | 0.00  | -0.01 | 0.02  | 0.01  | 0.03  | -0.13 | -0.10 | -0.19 |
| 18 | 1 | -0.01 | -0.09 | 0.01  | -0.05 | 0.14  | -0.03 | 0.01  | -0.03 | 0.00  |
| 19 | 1 | 0.13  | -0.09 | -0.04 | 0.47  | -0.36 | -0.12 | 0.06  | -0.06 | 0.02  |
| 20 | 1 | -0.01 | 0.01  | 0.00  | 0.06  | -0.05 | 0.03  | 0.47  | -0.18 | 0.05  |
| 21 | 8 | 0.01  | 0.00  | 0.00  | -0.03 | 0.01  | -0.01 | 0.01  | 0.00  | 0.00  |
| 22 | 8 | -0.01 | 0.00  | 0.00  | 0.01  | 0.00  | 0.00  | -0.01 | 0.00  | 0.00  |
| 23 | 1 | 0.07  | 0.06  | 0.02  | -0.05 | -0.05 | -0.01 | 0.03  | 0.03  | 0.01  |
| 24 | 8 | 0.00  | 0.00  | 0.00  | 0.00  | 0.00  | 0.00  | 0.00  | 0.00  | 0.00  |
| 25 | 1 | 0.00  | 0.00  | 0.00  | -0.02 | 0.01  | -0.01 | 0.09  | 0.01  | 0.03  |
| 26 | 7 | -0.05 | 0.03  | 0.06  | -0.01 | 0.00  | 0.01  | 0.04  | 0.00  | -0.01 |
| 27 | 1 | -0.37 | 0.23  | 0.46  | -0.02 | 0.01  | 0.03  | 0.02  | 0.00  | 0.00  |
| 28 | 7 | -0.07 | -0.06 | -0.12 | -0.01 | 0.00  | -0.01 | 0.02  | 0.00  | 0.01  |
| 29 | 1 | 0.01  | 0.00  | 0.00  | 0.01  | -0.06 | -0.03 | 0.01  | 0.26  | 0.43  |
| 30 | 6 | -0.03 | 0.03  | 0.05  | 0.00  | 0.00  | 0.01  | 0.01  | -0.02 | -0.03 |
| 31 | 1 | 0.61  | -0.03 | -0.03 | 0.05  | 0.00  | 0.00  | -0.16 | -0.01 | -0.02 |
| 32 | 6 | 0.05  | 0.02  | 0.05  | 0.01  | 0.00  | 0.00  | -0.03 | 0.00  | 0.01  |
| 33 | 1 | 0.09  | -0.13 | -0.27 | 0.01  | -0.01 | -0.01 | -0.04 | -0.01 | -0.03 |
| 34 | 6 | 0.10  | -0.02 | -0.04 | 0.01  | 0.00  | 0.00  | -0.01 | 0.01  | 0.01  |
| 35 | 1 | -0.09 | -0.05 | -0.09 | 0.00  | 0.00  | -0.01 | -0.03 | 0.01  | 0.01  |
| 36 | 1 | 0.00  | 0.00  | 0.00  | 0.00  | -0.01 | 0.00  | 0.01  | 0.01  | 0.00  |

73

74

75

A

A

A

Frequencies -- 1390.8586 1415.4398 1455.0786

Red. masses -- 2.6547 2.8691 4.1258

Frc consts -- 3.0257 3.3867 5.1467

IR Inten -- 110.0538 54.6905 25.7234

Raman Activ -- 12.5555 11.3145 35.8420

Depolar (P) -- 0.1806 0.1446 0.6023

Depolar (U) -- 0.3060 0.2527 0.7518

| Atom | AN | X     | Y     | Z     | X     | Y     | Z     | X     | Y     | Z     |
|------|----|-------|-------|-------|-------|-------|-------|-------|-------|-------|
| 1    | 8  | 0.00  | 0.00  | 0.00  | 0.00  | 0.00  | 0.00  | 0.00  | 0.00  | 0.00  |
| 2    | 1  | -0.01 | -0.01 | -0.01 | 0.00  | 0.00  | 0.00  | 0.00  | 0.00  | 0.00  |
| 3    | 1  | -0.01 | -0.01 | 0.00  | 0.00  | 0.00  | 0.00  | 0.00  | 0.00  | 0.00  |
| 4    | 6  | 0.06  | 0.02  | 0.00  | 0.01  | -0.01 | 0.00  | 0.01  | -0.01 | 0.00  |
| 5    | 6  | -0.05 | 0.00  | 0.00  | 0.00  | 0.00  | 0.00  | 0.00  | 0.00  | 0.00  |
| 6    | 6  | -0.02 | 0.00  | 0.00  | 0.00  | 0.01  | 0.00  | 0.00  | 0.01  | 0.00  |
| 7    | 6  | 0.00  | 0.00  | 0.00  | 0.00  | 0.00  | 0.00  | 0.00  | 0.00  | 0.00  |
| 8    | 6  | 0.08  | -0.09 | 0.02  | 0.01  | 0.01  | 0.00  | 0.01  | 0.01  | 0.00  |
| 9    | 6  | 0.02  | 0.00  | 0.01  | -0.03 | -0.01 | -0.02 | -0.02 | 0.00  | 0.00  |
| 10   | 6  | -0.06 | 0.02  | 0.00  | 0.00  | 0.00  | 0.00  | 0.00  | 0.00  | 0.00  |
| 11   | 1  | -0.03 | 0.00  | 0.00  | -0.03 | -0.01 | 0.00  | -0.03 | -0.01 | 0.00  |
| 12   | 8  | 0.00  | 0.00  | 0.00  | 0.00  | 0.00  | 0.00  | 0.00  | 0.00  | 0.00  |
| 13   | 8  | -0.01 | 0.00  | 0.00  | 0.00  | 0.00  | 0.00  | 0.00  | 0.00  | 0.00  |
| 14   | 6  | 0.06  | -0.04 | 0.01  | 0.00  | -0.01 | 0.00  | 0.00  | -0.01 | 0.00  |
| 15   | 6  | 0.06  | 0.30  | -0.01 | 0.00  | 0.00  | 0.00  | 0.00  | -0.01 | 0.00  |
| 16   | 8  | 0.00  | 0.00  | 0.00  | 0.00  | 0.00  | 0.01  | 0.00  | 0.00  | -0.01 |
| 17   | 8  | -0.01 | 0.00  | -0.01 | 0.01  | 0.00  | 0.00  | 0.01  | 0.00  | 0.01  |
| 18   | 1  | -0.06 | 0.13  | -0.02 | 0.00  | 0.00  | 0.00  | 0.00  | 0.00  | 0.00  |
| 19   | 1  | 0.11  | -0.08 | -0.03 | 0.01  | 0.00  | 0.00  | -0.01 | 0.01  | 0.00  |
| 20   | 1  | -0.36 | 0.20  | -0.06 | -0.04 | 0.01  | 0.00  | -0.03 | 0.01  | 0.00  |
| 21   | 8  | -0.06 | -0.04 | -0.02 | 0.00  | 0.00  | 0.00  | 0.00  | 0.00  | 0.00  |
| 22   | 8  | 0.03  | -0.09 | 0.02  | 0.00  | 0.00  | 0.00  | 0.00  | 0.00  | 0.00  |
| 23   | 1  | -0.58 | -0.52 | -0.16 | 0.00  | 0.00  | 0.00  | 0.00  | 0.00  | 0.00  |
| 24   | 8  | 0.00  | 0.00  | 0.00  | 0.00  | 0.00  | 0.00  | 0.00  | 0.00  | 0.00  |
| 25   | 1  | 0.00  | 0.00  | 0.00  | 0.01  | 0.00  | 0.00  | 0.00  | 0.00  | 0.00  |
| 26   | 7  | 0.00  | 0.00  | 0.00  | 0.01  | -0.06 | -0.13 | 0.08  | 0.00  | 0.00  |
| 27   | 1  | 0.00  | 0.01  | 0.01  | -0.30 | 0.14  | 0.27  | -0.12 | 0.12  | 0.25  |
| 28   | 7  | 0.00  | 0.00  | -0.01 | 0.16  | 0.06  | 0.14  | -0.12 | 0.03  | 0.06  |
| 29   | 1  | 0.01  | 0.02  | 0.03  | 0.02  | 0.12  | 0.20  | 0.02  | 0.01  | 0.03  |

|    |   |      |      |      |       |       |       |       |       |       |
|----|---|------|------|------|-------|-------|-------|-------|-------|-------|
| 30 | 6 | 0.00 | 0.00 | 0.00 | -0.17 | -0.06 | -0.12 | 0.20  | -0.09 | -0.17 |
| 31 | 1 | 0.00 | 0.00 | 0.00 | 0.06  | -0.09 | -0.17 | -0.50 | -0.04 | -0.11 |
| 32 | 6 | 0.00 | 0.00 | 0.00 | -0.08 | 0.03  | 0.06  | -0.02 | 0.16  | 0.32  |
| 33 | 1 | 0.00 | 0.00 | 0.00 | -0.07 | -0.17 | -0.35 | 0.05  | -0.24 | -0.49 |
| 34 | 6 | 0.00 | 0.00 | 0.00 | 0.13  | 0.03  | 0.08  | -0.10 | -0.09 | -0.18 |
| 35 | 1 | 0.01 | 0.00 | 0.00 | -0.63 | -0.04 | -0.11 | 0.21  | -0.07 | -0.13 |
| 36 | 1 | 0.00 | 0.00 | 0.00 | 0.00  | 0.00  | 0.00  | 0.00  | 0.00  | 0.00  |

|                |  |           |  |    |  |           |  |  |  |           |
|----------------|--|-----------|--|----|--|-----------|--|--|--|-----------|
|                |  | 76        |  | 77 |  | 78        |  |  |  |           |
|                |  | A         |  | A  |  | A         |  |  |  |           |
| Frequencies -- |  | 1467.7639 |  |    |  | 1504.8904 |  |  |  | 1513.8943 |
| Red. masses -- |  | 1.5716    |  |    |  | 2.6187    |  |  |  | 3.8712    |
| Frc consts --  |  | 1.9948    |  |    |  | 3.4942    |  |  |  | 5.2274    |
| IR Inten --    |  | 25.4042   |  |    |  | 13.5268   |  |  |  | 22.4760   |
| Raman Activ -- |  | 1.5164    |  |    |  | 0.1133    |  |  |  | 12.6690   |
| Depolar (P) -- |  | 0.7350    |  |    |  | 0.5318    |  |  |  | 0.2611    |
| Depolar (U) -- |  | 0.8472    |  |    |  | 0.6943    |  |  |  | 0.4141    |

|      |    |       |       |       |       |       |       |       |       |       |
|------|----|-------|-------|-------|-------|-------|-------|-------|-------|-------|
| Atom | AN | X     | Y     | Z     | X     | Y     | Z     | X     | Y     | Z     |
| 1    | 8  | 0.00  | 0.02  | 0.01  | 0.00  | 0.00  | 0.00  | 0.00  | -0.01 | 0.00  |
| 2    | 1  | -0.01 | -0.07 | -0.05 | 0.00  | -0.02 | -0.02 | 0.00  | 0.02  | 0.02  |
| 3    | 1  | -0.01 | -0.05 | -0.01 | 0.00  | -0.02 | 0.00  | 0.00  | 0.02  | 0.00  |
| 4    | 6  | -0.03 | 0.02  | 0.00  | -0.13 | -0.09 | 0.02  | -0.10 | 0.22  | -0.04 |
| 5    | 6  | 0.05  | -0.03 | 0.01  | 0.01  | 0.10  | -0.02 | 0.24  | 0.00  | 0.00  |
| 6    | 6  | -0.06 | -0.02 | 0.01  | 0.13  | -0.04 | 0.00  | -0.06 | -0.10 | 0.02  |
| 7    | 6  | -0.03 | 0.16  | 0.03  | -0.01 | 0.08  | 0.01  | 0.01  | -0.15 | 0.01  |
| 8    | 6  | -0.05 | 0.00  | 0.00  | 0.12  | -0.08 | 0.02  | -0.10 | -0.22 | 0.05  |
| 9    | 6  | -0.01 | 0.00  | -0.01 | -0.01 | -0.02 | 0.01  | -0.07 | -0.01 | -0.03 |
| 10   | 6  | 0.03  | -0.02 | 0.00  | 0.01  | 0.19  | -0.04 | 0.08  | 0.00  | 0.00  |
| 11   | 1  | 0.24  | 0.13  | -0.04 | -0.29 | -0.27 | 0.06  | 0.41  | 0.13  | -0.04 |
| 12   | 8  | 0.05  | -0.02 | -0.02 | 0.03  | -0.01 | -0.01 | 0.00  | 0.02  | 0.00  |
| 13   | 8  | -0.05 | -0.05 | 0.00  | -0.01 | -0.02 | 0.00  | 0.00  | 0.03  | 0.00  |
| 14   | 6  | 0.02  | 0.02  | 0.00  | -0.13 | -0.03 | 0.00  | -0.08 | 0.10  | -0.02 |
| 15   | 6  | 0.00  | 0.00  | 0.00  | 0.01  | 0.04  | 0.00  | 0.02  | 0.11  | -0.02 |
| 16   | 8  | 0.00  | 0.00  | 0.00  | 0.00  | 0.00  | -0.01 | 0.00  | 0.00  | 0.00  |
| 17   | 8  | 0.00  | 0.00  | 0.00  | 0.00  | 0.00  | 0.00  | 0.00  | 0.02  | 0.04  |
| 18   | 1  | 0.05  | 0.15  | -0.03 | -0.02 | -0.66 | 0.13  | 0.11  | -0.04 | 0.01  |
| 19   | 1  | 0.68  | -0.58 | -0.18 | 0.18  | -0.15 | -0.05 | -0.20 | 0.17  | 0.05  |
| 20   | 1  | 0.04  | 0.01  | 0.00  | 0.29  | -0.31 | 0.07  | 0.48  | -0.22 | 0.05  |
| 21   | 8  | 0.01  | 0.00  | 0.00  | -0.02 | 0.00  | -0.01 | 0.00  | -0.01 | 0.00  |
| 22   | 8  | 0.00  | 0.00  | 0.00  | 0.00  | -0.01 | 0.00  | -0.01 | -0.02 | 0.00  |
| 23   | 1  | 0.01  | 0.01  | 0.00  | -0.04 | -0.03 | -0.01 | -0.06 | -0.05 | -0.02 |
| 24   | 8  | 0.00  | 0.00  | 0.00  | 0.00  | 0.00  | 0.00  | 0.00  | 0.00  | 0.00  |
| 25   | 1  | -0.01 | 0.00  | -0.01 | 0.00  | 0.00  | -0.01 | -0.03 | 0.00  | -0.01 |
| 26   | 7  | 0.00  | 0.00  | 0.00  | 0.00  | 0.00  | 0.00  | -0.01 | 0.00  | -0.01 |
| 27   | 1  | 0.00  | 0.00  | 0.01  | 0.00  | 0.00  | 0.00  | -0.03 | 0.01  | 0.02  |
| 28   | 7  | 0.00  | 0.00  | 0.00  | 0.00  | 0.00  | 0.00  | 0.01  | 0.01  | 0.02  |
| 29   | 1  | -0.01 | -0.03 | -0.04 | 0.00  | 0.01  | -0.02 | -0.06 | -0.21 | -0.36 |
| 30   | 6  | 0.00  | 0.00  | 0.00  | 0.00  | 0.00  | 0.00  | -0.01 | -0.01 | -0.01 |
| 31   | 1  | -0.01 | 0.00  | 0.00  | 0.00  | 0.00  | 0.00  | -0.01 | -0.01 | -0.02 |
| 32   | 6  | 0.00  | 0.00  | 0.00  | 0.00  | 0.00  | 0.00  | 0.00  | 0.01  | 0.02  |
| 33   | 1  | 0.00  | 0.00  | -0.01 | 0.00  | 0.00  | 0.00  | 0.00  | -0.02 | -0.03 |
| 34   | 6  | 0.00  | 0.00  | 0.00  | 0.00  | 0.00  | 0.00  | 0.01  | 0.00  | 0.00  |
| 35   | 1  | 0.00  | 0.00  | 0.00  | 0.00  | 0.00  | 0.00  | -0.02 | -0.01 | -0.01 |
| 36   | 1  | 0.00  | 0.00  | 0.00  | 0.00  | 0.01  | 0.00  | 0.00  | 0.00  | 0.00  |

|                |  |           |  |    |  |           |  |  |  |           |
|----------------|--|-----------|--|----|--|-----------|--|--|--|-----------|
|                |  | 79        |  | 80 |  | 81        |  |  |  |           |
|                |  | A         |  | A  |  | A         |  |  |  |           |
| Frequencies -- |  | 1539.4849 |  |    |  | 1561.7226 |  |  |  | 1591.6837 |
| Red. masses -- |  | 2.5891    |  |    |  | 1.5496    |  |  |  | 2.5276    |
| Frc consts --  |  | 3.6153    |  |    |  | 2.2268    |  |  |  | 3.7729    |
| IR Inten --    |  | 48.5029   |  |    |  | 10.6083   |  |  |  | 9.1632    |
| Raman Activ -- |  | 10.9951   |  |    |  | 2.4322    |  |  |  | 5.4600    |



|                |        |        |        |
|----------------|--------|--------|--------|
| Depolar (P) -- | 0.5805 | 0.7431 | 0.6302 |
| Depolar (U) -- | 0.7346 | 0.8526 | 0.7732 |

| Atom | AN | X     | Y     | Z     | X     | Y     | Z     | X     | Y     | Z     |
|------|----|-------|-------|-------|-------|-------|-------|-------|-------|-------|
| 1    | 8  | 0.00  | 0.00  | 0.00  | 0.00  | 0.00  | 0.00  | 0.00  | 0.00  | 0.00  |
| 2    | 1  | 0.00  | 0.00  | 0.00  | 0.00  | 0.00  | 0.00  | 0.00  | 0.00  | 0.00  |
| 3    | 1  | 0.00  | 0.00  | 0.00  | 0.00  | 0.00  | 0.00  | 0.00  | 0.00  | 0.00  |
| 4    | 6  | 0.01  | -0.01 | 0.00  | 0.00  | 0.02  | 0.00  | 0.00  | 0.01  | 0.00  |
| 5    | 6  | -0.01 | 0.00  | 0.00  | 0.04  | 0.00  | 0.00  | 0.02  | 0.00  | 0.00  |
| 6    | 6  | 0.00  | 0.00  | 0.00  | -0.02 | -0.01 | 0.00  | -0.01 | -0.01 | 0.00  |
| 7    | 6  | 0.00  | 0.00  | 0.00  | 0.00  | -0.01 | 0.00  | 0.00  | -0.01 | 0.00  |
| 8    | 6  | 0.00  | 0.01  | 0.00  | 0.00  | -0.02 | 0.00  | 0.00  | -0.01 | 0.00  |
| 9    | 6  | 0.01  | 0.03  | 0.05  | -0.06 | -0.04 | -0.09 | -0.05 | -0.01 | -0.02 |
| 10   | 6  | -0.01 | 0.00  | 0.00  | 0.01  | 0.00  | 0.00  | 0.01  | 0.00  | 0.00  |
| 11   | 1  | -0.02 | -0.01 | 0.00  | 0.04  | 0.02  | -0.01 | 0.02  | 0.01  | 0.00  |
| 12   | 8  | 0.00  | 0.00  | 0.00  | 0.00  | 0.00  | 0.00  | 0.00  | 0.00  | 0.00  |
| 13   | 8  | 0.00  | 0.00  | 0.00  | 0.00  | 0.00  | 0.00  | 0.00  | 0.00  | 0.00  |
| 14   | 6  | 0.01  | 0.00  | 0.00  | -0.02 | 0.01  | 0.00  | -0.01 | 0.01  | 0.00  |
| 15   | 6  | 0.00  | 0.00  | 0.00  | 0.00  | 0.01  | 0.00  | 0.00  | 0.00  | 0.00  |
| 16   | 8  | 0.01  | -0.02 | -0.04 | -0.02 | 0.03  | 0.06  | 0.00  | 0.00  | 0.01  |
| 17   | 8  | -0.02 | 0.01  | 0.02  | 0.04  | -0.02 | -0.03 | 0.02  | -0.01 | -0.01 |
| 18   | 1  | -0.01 | 0.00  | 0.00  | 0.02  | 0.00  | 0.00  | 0.01  | 0.00  | 0.00  |
| 19   | 1  | 0.00  | 0.00  | 0.00  | 0.00  | 0.00  | 0.00  | 0.00  | 0.00  | 0.00  |
| 20   | 1  | -0.02 | 0.01  | 0.00  | 0.05  | -0.03 | 0.01  | 0.03  | -0.02 | 0.00  |
| 21   | 8  | 0.00  | 0.00  | 0.00  | 0.00  | 0.00  | 0.00  | 0.00  | 0.00  | 0.00  |
| 22   | 8  | 0.00  | 0.00  | 0.00  | 0.00  | 0.00  | 0.00  | 0.00  | 0.00  | 0.00  |
| 23   | 1  | 0.00  | 0.00  | 0.00  | 0.00  | 0.00  | 0.00  | 0.00  | 0.00  | 0.00  |
| 24   | 8  | 0.00  | 0.00  | 0.00  | 0.00  | 0.00  | 0.00  | 0.00  | 0.00  | 0.00  |
| 25   | 1  | -0.01 | 0.01  | -0.02 | 0.02  | -0.03 | 0.04  | 0.00  | -0.01 | 0.03  |
| 26   | 7  | 0.20  | -0.05 | -0.09 | 0.05  | 0.00  | 0.00  | 0.08  | -0.04 | -0.07 |
| 27   | 1  | -0.31 | 0.30  | 0.60  | 0.06  | 0.00  | 0.00  | -0.35 | 0.24  | 0.47  |
| 28   | 7  | 0.00  | 0.02  | 0.03  | 0.01  | -0.01 | -0.02 | -0.15 | -0.01 | -0.02 |
| 29   | 1  | -0.04 | -0.22 | -0.37 | 0.12  | 0.46  | 0.80  | 0.10  | 0.20  | 0.37  |
| 30   | 6  | -0.11 | 0.01  | 0.01  | -0.07 | 0.01  | 0.02  | 0.20  | 0.01  | 0.03  |
| 31   | 1  | 0.15  | -0.01 | -0.01 | 0.17  | -0.01 | -0.01 | -0.35 | 0.06  | 0.11  |
| 32   | 6  | 0.10  | -0.02 | -0.04 | 0.06  | 0.01  | 0.01  | -0.09 | -0.05 | -0.11 |
| 33   | 1  | 0.10  | 0.07  | 0.14  | 0.07  | 0.01  | 0.02  | -0.15 | 0.09  | 0.18  |
| 34   | 6  | -0.22 | 0.02  | 0.02  | -0.10 | -0.01 | -0.03 | 0.08  | 0.06  | 0.12  |
| 35   | 1  | 0.22  | 0.07  | 0.15  | 0.17  | 0.01  | 0.03  | -0.26 | 0.04  | 0.06  |
| 36   | 1  | 0.00  | 0.02  | 0.00  | 0.00  | -0.04 | -0.01 | 0.00  | -0.03 | 0.00  |

|  |    |    |    |
|--|----|----|----|
|  | 82 | 83 | 84 |
|  | A  | A  | A  |

|                |           |           |           |
|----------------|-----------|-----------|-----------|
| Frequencies -- | 1649.2659 | 1657.8124 | 1666.0277 |
| Red. masses -- | 1.0945    | 7.4008    | 6.3963    |
| Frc consts --  | 1.7540    | 11.9839   | 10.4603   |
| IR Inten --    | 31.2017   | 59.8975   | 9.5473    |
| Raman Activ -- | 1.9853    | 35.5496   | 19.2973   |
| Depolar (P) -- | 0.5098    | 0.7500    | 0.7497    |
| Depolar (U) -- | 0.6753    | 0.8571    | 0.8569    |

| Atom | AN | X     | Y     | Z     | X     | Y     | Z     | X     | Y     | Z     |
|------|----|-------|-------|-------|-------|-------|-------|-------|-------|-------|
| 1    | 8  | 0.01  | -0.01 | 0.00  | 0.00  | 0.00  | 0.00  | 0.00  | 0.00  | 0.00  |
| 2    | 1  | -0.08 | 0.03  | 0.05  | -0.02 | 0.01  | 0.02  | 0.04  | 0.00  | -0.02 |
| 3    | 1  | -0.05 | 0.06  | -0.05 | -0.01 | 0.02  | -0.01 | 0.02  | -0.02 | 0.02  |
| 4    | 6  | 0.00  | -0.01 | 0.00  | -0.08 | 0.27  | -0.05 | -0.29 | 0.02  | 0.00  |
| 5    | 6  | 0.00  | 0.01  | 0.00  | 0.01  | -0.35 | 0.07  | 0.18  | 0.02  | -0.01 |
| 6    | 6  | 0.00  | 0.00  | 0.00  | -0.09 | -0.22 | 0.04  | 0.34  | 0.13  | -0.03 |
| 7    | 6  | 0.02  | 0.00  | -0.01 | -0.02 | -0.06 | 0.01  | -0.03 | 0.00  | 0.02  |
| 8    | 6  | 0.01  | 0.00  | 0.00  | 0.04  | 0.24  | -0.05 | -0.30 | -0.05 | 0.01  |
| 9    | 6  | 0.01  | 0.00  | 0.01  | 0.01  | 0.03  | -0.03 | -0.03 | -0.02 | -0.04 |
| 10   | 6  | 0.00  | -0.01 | 0.00  | 0.00  | 0.40  | -0.08 | -0.18 | -0.03 | 0.01  |
| 11   | 1  | 0.00  | 0.00  | 0.00  | 0.27  | -0.07 | 0.01  | -0.40 | -0.25 | 0.06  |

|    |   |       |       |       |       |       |       |       |       |       |
|----|---|-------|-------|-------|-------|-------|-------|-------|-------|-------|
| 12 | 8 | -0.01 | 0.00  | 0.00  | 0.01  | 0.01  | -0.01 | 0.04  | 0.01  | -0.02 |
| 13 | 8 | 0.00  | 0.00  | 0.00  | 0.00  | 0.00  | 0.00  | 0.00  | 0.00  | 0.00  |
| 14 | 6 | -0.01 | 0.01  | 0.00  | 0.13  | -0.24 | 0.05  | 0.31  | -0.11 | 0.02  |
| 15 | 6 | 0.00  | 0.00  | 0.00  | 0.00  | -0.05 | 0.01  | -0.02 | 0.02  | -0.02 |
| 16 | 8 | 0.00  | 0.00  | 0.00  | -0.01 | 0.00  | 0.01  | -0.01 | 0.01  | 0.02  |
| 17 | 8 | 0.00  | 0.00  | 0.00  | 0.00  | 0.00  | 0.00  | 0.01  | 0.00  | 0.01  |
| 18 | 1 | 0.00  | 0.01  | 0.00  | -0.04 | -0.45 | 0.08  | -0.21 | 0.05  | -0.01 |
| 19 | 1 | 0.02  | -0.02 | -0.01 | -0.04 | 0.03  | 0.01  | -0.01 | 0.00  | 0.00  |
| 20 | 1 | 0.01  | -0.01 | 0.00  | -0.33 | 0.01  | -0.01 | -0.35 | 0.29  | -0.07 |
| 21 | 8 | 0.00  | 0.00  | 0.00  | 0.00  | 0.01  | 0.00  | 0.04  | -0.01 | 0.02  |
| 22 | 8 | 0.00  | 0.00  | 0.00  | 0.00  | 0.00  | 0.00  | 0.00  | 0.00  | 0.00  |
| 23 | 1 | 0.00  | 0.00  | 0.00  | 0.03  | 0.02  | 0.01  | -0.01 | 0.00  | 0.00  |
| 24 | 8 | 0.02  | 0.06  | -0.03 | 0.00  | 0.01  | 0.00  | 0.00  | 0.01  | 0.00  |
| 25 | 1 | -0.27 | -0.28 | 0.62  | -0.03 | -0.04 | 0.08  | -0.03 | -0.04 | 0.08  |
| 26 | 7 | 0.00  | 0.00  | 0.00  | 0.00  | 0.00  | 0.00  | 0.01  | 0.00  | -0.01 |
| 27 | 1 | 0.00  | 0.00  | 0.00  | -0.01 | 0.00  | 0.01  | -0.02 | 0.02  | 0.04  |
| 28 | 7 | 0.00  | 0.00  | 0.00  | 0.00  | 0.00  | 0.00  | -0.01 | 0.00  | 0.00  |
| 29 | 1 | 0.00  | -0.05 | -0.03 | 0.00  | -0.03 | 0.02  | 0.00  | 0.02  | 0.03  |
| 30 | 6 | 0.00  | 0.00  | 0.00  | 0.00  | 0.00  | 0.00  | 0.01  | 0.00  | 0.00  |
| 31 | 1 | 0.00  | 0.00  | 0.00  | 0.00  | 0.00  | 0.00  | -0.01 | 0.00  | 0.00  |
| 32 | 6 | 0.00  | 0.00  | 0.00  | 0.00  | 0.00  | 0.00  | 0.00  | 0.00  | 0.00  |
| 33 | 1 | 0.00  | 0.00  | 0.00  | 0.00  | 0.00  | 0.00  | 0.00  | 0.00  | 0.01  |
| 34 | 6 | 0.00  | 0.00  | 0.00  | 0.00  | 0.00  | 0.00  | 0.00  | 0.00  | 0.00  |
| 35 | 1 | 0.00  | 0.00  | 0.00  | 0.00  | 0.00  | 0.00  | -0.01 | 0.00  | 0.00  |
| 36 | 1 | -0.07 | -0.64 | -0.12 | -0.01 | -0.08 | -0.01 | -0.01 | -0.08 | -0.01 |

85

86

87

A

A

A

Frequencies -- 1685.9291 1811.9039 1821.0979

Red. masses -- 1.0765 6.9126 8.5160

Frc consts -- 1.8028 13.3710 16.6399

IR Inten -- 55.5552 217.7786 290.3235

Raman Activ -- 1.2354 20.0688 34.4412

Depolar (P) -- 0.6273 0.3735 0.2434

Depolar (U) -- 0.7710 0.5438 0.3915

| Atom | AN | X     | Y     | Z     | X     | Y     | Z     | X     | Y     | Z     |
|------|----|-------|-------|-------|-------|-------|-------|-------|-------|-------|
| 1    | 8  | -0.06 | 0.03  | 0.00  | 0.00  | 0.00  | 0.00  | -0.01 | 0.01  | 0.00  |
| 2    | 1  | 0.62  | -0.15 | -0.41 | 0.01  | -0.01 | -0.03 | 0.08  | -0.06 | -0.09 |
| 3    | 1  | 0.33  | -0.40 | 0.36  | 0.01  | -0.02 | 0.01  | 0.01  | -0.11 | 0.03  |
| 4    | 6  | 0.01  | 0.00  | 0.00  | -0.03 | 0.01  | 0.00  | -0.09 | -0.01 | 0.01  |
| 5    | 6  | 0.00  | 0.00  | 0.00  | 0.07  | -0.02 | -0.01 | 0.01  | -0.01 | 0.00  |
| 6    | 6  | 0.00  | 0.00  | 0.00  | 0.01  | 0.00  | 0.00  | 0.02  | -0.02 | 0.00  |
| 7    | 6  | -0.01 | -0.01 | 0.00  | 0.12  | 0.00  | -0.04 | 0.60  | 0.01  | -0.19 |
| 8    | 6  | 0.00  | 0.00  | 0.00  | -0.03 | 0.01  | 0.00  | 0.01  | 0.00  | 0.00  |
| 9    | 6  | 0.00  | 0.00  | 0.00  | -0.30 | 0.24  | 0.42  | 0.07  | -0.03 | -0.08 |
| 10   | 6  | 0.00  | 0.00  | 0.00  | 0.00  | 0.00  | 0.00  | 0.00  | 0.02  | -0.01 |
| 11   | 1  | 0.00  | 0.00  | 0.00  | -0.01 | -0.01 | 0.00  | -0.01 | -0.04 | 0.01  |
| 12   | 8  | 0.01  | 0.00  | 0.00  | -0.07 | 0.00  | 0.02  | -0.36 | 0.00  | 0.12  |
| 13   | 8  | 0.00  | 0.00  | 0.00  | -0.01 | 0.01  | 0.00  | -0.06 | 0.04  | 0.02  |
| 14   | 6  | 0.00  | 0.00  | 0.00  | 0.01  | -0.01 | 0.00  | 0.01  | -0.01 | 0.00  |
| 15   | 6  | 0.00  | 0.00  | 0.00  | 0.08  | -0.01 | 0.03  | -0.15 | 0.02  | -0.06 |
| 16   | 8  | 0.00  | 0.00  | 0.00  | 0.17  | -0.15 | -0.26 | -0.04 | 0.03  | 0.05  |
| 17   | 8  | 0.00  | 0.00  | 0.00  | -0.01 | -0.03 | -0.06 | 0.00  | 0.00  | 0.01  |
| 18   | 1  | 0.00  | 0.00  | 0.00  | -0.01 | 0.00  | 0.00  | -0.01 | -0.03 | 0.01  |
| 19   | 1  | -0.04 | 0.03  | -0.01 | 0.07  | -0.08 | -0.02 | 0.35  | -0.37 | -0.11 |
| 20   | 1  | 0.00  | 0.00  | 0.00  | -0.03 | 0.02  | 0.00  | -0.01 | 0.00  | 0.00  |
| 21   | 8  | 0.00  | 0.00  | 0.00  | -0.05 | 0.00  | -0.02 | 0.10  | -0.01 | 0.04  |
| 22   | 8  | 0.00  | 0.00  | 0.00  | -0.01 | 0.00  | 0.00  | 0.01  | 0.00  | 0.00  |
| 23   | 1  | 0.00  | 0.00  | 0.00  | 0.04  | 0.03  | 0.02  | -0.08 | -0.06 | -0.03 |
| 24   | 8  | 0.00  | 0.01  | 0.00  | 0.00  | 0.00  | 0.00  | 0.00  | -0.01 | 0.01  |
| 25   | 1  | -0.04 | -0.03 | 0.07  | 0.03  | 0.03  | -0.02 | 0.03  | 0.07  | -0.15 |

|    |   |      |       |       |       |       |       |       |       |       |
|----|---|------|-------|-------|-------|-------|-------|-------|-------|-------|
| 26 | 7 | 0.00 | 0.00  | 0.00  | -0.01 | 0.01  | 0.02  | 0.00  | 0.00  | 0.00  |
| 27 | 1 | 0.00 | 0.00  | 0.00  | 0.12  | -0.11 | -0.22 | -0.02 | 0.04  | 0.04  |
| 28 | 7 | 0.00 | 0.00  | 0.00  | 0.02  | 0.00  | -0.01 | 0.00  | 0.00  | 0.00  |
| 29 | 1 | 0.00 | 0.00  | 0.00  | 0.21  | 0.28  | 0.54  | -0.04 | -0.03 | -0.14 |
| 30 | 6 | 0.00 | 0.00  | 0.00  | -0.02 | 0.00  | 0.00  | 0.00  | 0.00  | 0.00  |
| 31 | 1 | 0.00 | 0.00  | 0.00  | 0.02  | 0.00  | -0.01 | 0.00  | 0.00  | 0.00  |
| 32 | 6 | 0.00 | 0.00  | 0.00  | 0.00  | 0.00  | 0.00  | 0.00  | 0.00  | 0.00  |
| 33 | 1 | 0.00 | 0.00  | 0.00  | 0.00  | -0.01 | -0.02 | 0.00  | 0.00  | 0.00  |
| 34 | 6 | 0.00 | 0.00  | 0.00  | 0.00  | -0.01 | -0.01 | 0.00  | 0.00  | 0.00  |
| 35 | 1 | 0.00 | 0.00  | 0.00  | 0.03  | -0.01 | -0.01 | 0.00  | 0.00  | 0.00  |
| 36 | 1 | 0.00 | -0.11 | -0.01 | 0.01  | 0.02  | 0.00  | 0.02  | 0.09  | 0.02  |

88

89

90

A

A

A

Frequencies -- 1850.5154 2828.1929 3213.2203

Red. masses -- 10.1130 1.0811 1.0887

Frc consts -- 20.4040 5.0951 6.6225

IR Inten -- 501.9719 3286.0260 5.8060

Raman Activ -- 73.2193 403.9878 75.0531

Depolar (P) -- 0.1158 0.3263 0.5704

Depolar (U) -- 0.2076 0.4921 0.7264

| Atom | AN | X     | Y     | Z     | X     | Y     | Z     | X     | Y     | Z     |
|------|----|-------|-------|-------|-------|-------|-------|-------|-------|-------|
| 1    | 8  | 0.00  | 0.00  | 0.00  | 0.00  | 0.00  | 0.00  | 0.00  | 0.00  | 0.00  |
| 2    | 1  | 0.02  | -0.01 | -0.02 | 0.00  | 0.00  | 0.00  | 0.00  | 0.00  | 0.00  |
| 3    | 1  | 0.00  | -0.02 | 0.01  | 0.00  | 0.00  | 0.00  | 0.00  | 0.00  | 0.00  |
| 4    | 6  | -0.03 | -0.01 | 0.01  | 0.00  | 0.00  | 0.00  | 0.00  | 0.00  | 0.00  |
| 5    | 6  | 0.02  | 0.01  | 0.00  | 0.00  | 0.00  | 0.00  | 0.00  | 0.00  | 0.00  |
| 6    | 6  | 0.02  | 0.01  | 0.00  | 0.00  | 0.00  | 0.00  | 0.02  | -0.03 | 0.00  |
| 7    | 6  | 0.15  | 0.01  | -0.05 | 0.00  | 0.00  | 0.00  | 0.00  | 0.00  | 0.00  |
| 8    | 6  | -0.09 | 0.03  | -0.02 | 0.00  | 0.00  | 0.00  | 0.00  | 0.00  | 0.00  |
| 9    | 6  | 0.08  | -0.06 | -0.09 | 0.00  | -0.01 | -0.02 | 0.00  | 0.00  | 0.00  |
| 10   | 6  | -0.01 | -0.02 | 0.00  | 0.00  | 0.00  | 0.00  | -0.08 | 0.00  | 0.00  |
| 11   | 1  | -0.01 | -0.01 | 0.00  | 0.00  | 0.00  | 0.00  | -0.18 | 0.33  | -0.06 |
| 12   | 8  | -0.09 | 0.00  | 0.03  | 0.00  | 0.00  | 0.00  | 0.00  | 0.00  | 0.00  |
| 13   | 8  | -0.02 | 0.01  | 0.00  | 0.00  | 0.00  | 0.00  | 0.00  | 0.00  | 0.00  |
| 14   | 6  | 0.02  | 0.01  | 0.00  | 0.00  | 0.00  | 0.00  | 0.01  | 0.02  | 0.00  |
| 15   | 6  | 0.65  | -0.10 | 0.24  | 0.00  | 0.00  | 0.00  | 0.00  | 0.00  | 0.00  |
| 16   | 8  | -0.04 | 0.04  | 0.06  | 0.00  | 0.00  | 0.01  | 0.00  | 0.00  | 0.00  |
| 17   | 8  | -0.01 | 0.01  | 0.01  | -0.07 | 0.01  | 0.01  | 0.00  | 0.00  | 0.00  |
| 18   | 1  | -0.01 | 0.02  | 0.00  | 0.00  | 0.00  | 0.00  | 0.87  | -0.03 | 0.00  |
| 19   | 1  | 0.08  | -0.10 | -0.02 | -0.01 | -0.01 | 0.00  | -0.01 | -0.01 | 0.00  |
| 20   | 1  | -0.01 | 0.04  | -0.01 | 0.00  | 0.00  | 0.00  | -0.15 | -0.24 | 0.05  |
| 21   | 8  | -0.41 | 0.04  | -0.15 | 0.00  | 0.00  | 0.00  | 0.00  | 0.00  | 0.00  |
| 22   | 8  | -0.06 | -0.01 | -0.02 | 0.00  | 0.00  | 0.00  | 0.00  | 0.00  | 0.00  |
| 23   | 1  | 0.33  | 0.28  | 0.09  | 0.00  | 0.00  | 0.00  | 0.00  | 0.00  | 0.00  |
| 24   | 8  | 0.00  | 0.00  | 0.00  | 0.00  | 0.00  | 0.00  | 0.00  | 0.00  | 0.00  |
| 25   | 1  | 0.00  | 0.01  | -0.02 | 0.00  | -0.02 | -0.01 | 0.00  | 0.00  | 0.00  |
| 26   | 7  | 0.00  | 0.00  | 0.00  | 0.00  | 0.00  | 0.00  | 0.00  | 0.00  | 0.00  |
| 27   | 1  | -0.03 | 0.02  | 0.06  | -0.02 | -0.02 | -0.03 | 0.00  | 0.00  | 0.00  |
| 28   | 7  | 0.00  | 0.00  | 0.00  | 0.00  | 0.00  | 0.00  | 0.00  | 0.00  | 0.00  |
| 29   | 1  | -0.06 | -0.09 | -0.14 | 0.99  | -0.11 | -0.06 | 0.00  | 0.00  | 0.00  |
| 30   | 6  | 0.00  | 0.00  | 0.00  | 0.00  | 0.00  | 0.00  | 0.00  | 0.00  | 0.00  |
| 31   | 1  | 0.00  | 0.00  | 0.00  | 0.00  | -0.01 | -0.02 | 0.00  | 0.00  | 0.00  |
| 32   | 6  | 0.00  | 0.00  | 0.00  | 0.00  | 0.00  | 0.00  | 0.00  | 0.00  | 0.00  |
| 33   | 1  | 0.00  | 0.00  | 0.00  | 0.00  | 0.00  | 0.00  | 0.00  | 0.00  | 0.00  |
| 34   | 6  | 0.00  | 0.00  | 0.00  | 0.00  | 0.00  | 0.00  | 0.00  | 0.00  | 0.00  |
| 35   | 1  | -0.01 | 0.00  | 0.00  | 0.01  | 0.00  | 0.00  | 0.00  | 0.00  | 0.00  |
| 36   | 1  | 0.01  | 0.01  | 0.00  | 0.00  | 0.00  | 0.00  | 0.00  | 0.00  | 0.00  |

91

92

93

A

A

A

Frequencies -- 3232.4913 3240.0430 3264.9276



99

A

[illegible]



36 1 0.00 0.00 0.00 0.00 0.00 0.00 -0.36 -0.10 0.90

# PYRHEM

Harmonic frequencies (cm\*\*-1), IR intensities (KM/Mole), Raman scattering activities (A\*\*4/AMU), depolarization ratios for plane and unpolarized incident light, reduced masses (AMU), force constants (mDyne/A), and normal coordinates:

|                |    | 1       |       |       | 2     |       |       | 3       |       |       |         |  |
|----------------|----|---------|-------|-------|-------|-------|-------|---------|-------|-------|---------|--|
|                |    | A       |       |       | A     |       |       | A       |       |       |         |  |
| Frequencies -- |    | 13.6471 |       |       |       |       |       | 19.0481 |       |       | 46.4070 |  |
| Red. masses -- |    | 8.4579  |       |       |       |       |       | 7.2008  |       |       | 7.7827  |  |
| Frc consts --  |    | 0.0009  |       |       |       |       |       | 0.0015  |       |       | 0.0099  |  |
| IR Inten --    |    | 0.7682  |       |       |       |       |       | 1.2719  |       |       | 1.3887  |  |
| Raman Activ -- |    | 1.5196  |       |       |       |       |       | 2.1890  |       |       | 0.0249  |  |
| Depolar (P) -- |    | 0.7486  |       |       |       |       |       | 0.7498  |       |       | 0.6851  |  |
| Depolar (U) -- |    | 0.8562  |       |       |       |       |       | 0.8570  |       |       | 0.8131  |  |
| Atom           | AN | X       | Y     | Z     | X     | Y     | Z     | X       | Y     | Z     |         |  |
| 1              | 6  | 0.05    | 0.02  | 0.02  | 0.04  | 0.02  | -0.01 | 0.00    | 0.01  | 0.06  |         |  |
| 2              | 6  | 0.00    | 0.05  | 0.00  | 0.00  | 0.04  | 0.00  | 0.00    | 0.01  | 0.08  |         |  |
| 3              | 6  | -0.05   | 0.02  | -0.01 | -0.05 | 0.02  | 0.02  | 0.00    | 0.01  | 0.07  |         |  |
| 4              | 6  | -0.05   | -0.04 | 0.00  | -0.05 | -0.04 | 0.03  | 0.00    | 0.00  | 0.13  |         |  |
| 5              | 1  | -0.09   | -0.06 | -0.01 | -0.09 | -0.05 | 0.05  | 0.00    | 0.00  | 0.14  |         |  |
| 6              | 6  | 0.00    | -0.06 | 0.03  | 0.00  | -0.06 | 0.02  | 0.00    | 0.01  | 0.19  |         |  |
| 7              | 6  | 0.04    | -0.04 | 0.04  | 0.04  | -0.04 | -0.01 | 0.00    | 0.00  | 0.13  |         |  |
| 8              | 1  | 0.08    | -0.06 | 0.06  | 0.08  | -0.06 | -0.02 | 0.00    | 0.00  | 0.12  |         |  |
| 9              | 6  | 0.10    | 0.04  | -0.02 | 0.10  | 0.04  | -0.01 | 0.00    | 0.00  | -0.05 |         |  |
| 10             | 8  | 0.14    | 0.09  | -0.22 | 0.07  | 0.08  | 0.15  | -0.04   | -0.03 | 0.15  |         |  |
| 11             | 6  | 0.00    | 0.10  | -0.01 | 0.00  | 0.09  | -0.01 | 0.00    | -0.01 | 0.06  |         |  |
| 12             | 8  | 0.00    | -0.03 | 0.00  | 0.00  | 0.21  | -0.03 | 0.01    | -0.01 | 0.05  |         |  |
| 13             | 8  | 0.00    | 0.25  | -0.04 | 0.00  | 0.00  | 0.00  | -0.02   | -0.04 | 0.06  |         |  |
| 14             | 6  | -0.10   | 0.05  | 0.00  | -0.10 | 0.05  | 0.00  | 0.00    | 0.00  | -0.04 |         |  |
| 15             | 8  | -0.07   | 0.09  | 0.23  | -0.13 | 0.09  | -0.18 | 0.03    | -0.02 | 0.12  |         |  |
| 16             | 8  | -0.18   | 0.03  | -0.26 | -0.11 | 0.01  | 0.20  | -0.03   | 0.03  | -0.38 |         |  |
| 17             | 1  | -0.21   | 0.05  | -0.22 | -0.14 | 0.03  | 0.16  | -0.02   | 0.02  | -0.43 |         |  |
| 18             | 7  | 0.01    | -0.08 | 0.01  | 0.00  | 0.06  | -0.01 | 0.01    | -0.01 | 0.01  |         |  |
| 19             | 1  | 0.00    | -0.03 | 0.00  | 0.00  | 0.19  | -0.03 | 0.01    | -0.02 | 0.04  |         |  |
| 20             | 7  | 0.00    | 0.02  | -0.01 | 0.00  | -0.12 | 0.01  | -0.01   | -0.02 | 0.01  |         |  |
| 21             | 1  | 0.00    | 0.14  | -0.02 | 0.00  | -0.11 | 0.01  | -0.02   | -0.04 | 0.03  |         |  |
| 22             | 6  | 0.00    | -0.07 | 0.00  | 0.00  | -0.30 | 0.03  | -0.02   | 0.00  | -0.01 |         |  |
| 23             | 1  | 0.00    | -0.02 | -0.01 | 0.00  | -0.46 | 0.05  | -0.04   | 0.00  | -0.02 |         |  |
| 24             | 6  | 0.01    | -0.25 | 0.02  | 0.00  | -0.23 | 0.02  | 0.00    | 0.03  | -0.03 |         |  |
| 25             | 1  | 0.01    | -0.36 | 0.04  | 0.00  | -0.34 | 0.03  | 0.00    | 0.06  | -0.05 |         |  |
| 26             | 6  | 0.01    | -0.24 | 0.02  | 0.00  | -0.01 | -0.01 | 0.02    | 0.02  | -0.01 |         |  |
| 27             | 1  | 0.01    | -0.35 | 0.04  | 0.00  | 0.10  | -0.02 | 0.04    | 0.04  | -0.02 |         |  |
| 28             | 8  | 0.09    | 0.00  | 0.20  | 0.17  | 0.02  | -0.19 | 0.05    | 0.04  | -0.42 |         |  |
| 29             | 1  | -0.01   | -0.11 | 0.05  | -0.01 | -0.11 | 0.02  | 0.00    | 0.01  | 0.26  |         |  |
| 30             | 1  | 0.13    | 0.02  | 0.14  | 0.19  | 0.04  | -0.16 | 0.04    | 0.03  | -0.46 |         |  |
|                |    | 4       |       |       | 5     |       |       | 6       |       |       |         |  |
|                |    | A       |       |       | A     |       |       | A       |       |       |         |  |
| Frequencies -- |    | 48.8375 |       |       |       |       |       | 58.4350 |       |       | 88.6761 |  |
| Red. masses -- |    | 6.8591  |       |       |       |       |       | 4.6969  |       |       | 5.8088  |  |
| Frc consts --  |    | 0.0096  |       |       |       |       |       | 0.0094  |       |       | 0.0269  |  |
| IR Inten --    |    | 3.1654  |       |       |       |       |       | 0.7498  |       |       | 0.3043  |  |
| Raman Activ -- |    | 4.0897  |       |       |       |       |       | 3.4216  |       |       | 2.1488  |  |
| Depolar (P) -- |    | 0.7495  |       |       |       |       |       | 0.7498  |       |       | 0.7498  |  |
| Depolar (U) -- |    | 0.8568  |       |       |       |       |       | 0.8570  |       |       | 0.8570  |  |
| Atom           | AN | X       | Y     | Z     | X     | Y     | Z     | X       | Y     | Z     |         |  |
| 1              | 6  | -0.01   | 0.00  | 0.01  | -0.01 | -0.01 | -0.02 | -0.02   | -0.03 | 0.01  |         |  |
| 2              | 6  | 0.00    | -0.01 | -0.07 | 0.00  | -0.01 | 0.00  | 0.00    | -0.05 | 0.02  |         |  |
| 3              | 6  | 0.01    | 0.00  | 0.01  | 0.01  | 0.00  | 0.02  | 0.02    | -0.03 | 0.01  |         |  |

|    |   |       |       |       |       |       |       |       |       |       |
|----|---|-------|-------|-------|-------|-------|-------|-------|-------|-------|
| 4  | 6 | 0.01  | 0.01  | 0.21  | 0.01  | 0.00  | 0.01  | 0.02  | -0.01 | 0.00  |
| 5  | 1 | 0.01  | 0.01  | 0.28  | 0.01  | 0.01  | 0.02  | 0.04  | 0.00  | -0.01 |
| 6  | 6 | 0.00  | 0.01  | 0.32  | 0.00  | 0.01  | -0.01 | 0.00  | 0.00  | 0.00  |
| 7  | 6 | -0.01 | 0.01  | 0.21  | -0.01 | 0.00  | -0.02 | -0.02 | -0.01 | 0.00  |
| 8  | 1 | -0.01 | 0.01  | 0.28  | -0.01 | 0.01  | -0.03 | -0.04 | 0.00  | -0.01 |
| 9  | 6 | -0.01 | -0.01 | -0.10 | -0.02 | -0.01 | -0.05 | -0.05 | -0.04 | 0.00  |
| 10 | 8 | 0.02  | -0.03 | -0.27 | 0.00  | -0.02 | -0.16 | -0.05 | -0.06 | 0.02  |
| 11 | 6 | 0.00  | -0.01 | -0.11 | 0.00  | -0.01 | 0.00  | 0.00  | -0.03 | 0.02  |
| 12 | 8 | -0.02 | 0.00  | -0.10 | 0.00  | -0.03 | 0.01  | 0.00  | 0.00  | 0.01  |
| 13 | 8 | 0.02  | 0.00  | -0.10 | 0.00  | 0.02  | 0.00  | 0.00  | 0.01  | 0.01  |
| 14 | 6 | 0.01  | -0.01 | -0.10 | 0.01  | -0.01 | 0.06  | 0.04  | -0.05 | 0.00  |
| 15 | 8 | -0.02 | -0.02 | -0.27 | 0.03  | -0.01 | 0.17  | 0.05  | -0.07 | 0.01  |
| 16 | 8 | 0.04  | 0.00  | 0.00  | 0.00  | 0.00  | -0.04 | 0.06  | -0.03 | -0.02 |
| 17 | 1 | 0.04  | -0.01 | -0.09 | 0.01  | 0.00  | -0.01 | 0.08  | -0.04 | -0.03 |
| 18 | 7 | -0.03 | 0.02  | 0.04  | 0.00  | 0.18  | -0.02 | 0.01  | 0.36  | -0.04 |
| 19 | 1 | -0.02 | 0.01  | -0.07 | 0.00  | 0.07  | 0.00  | 0.00  | 0.14  | -0.01 |
| 20 | 7 | 0.04  | 0.01  | 0.05  | 0.00  | -0.17 | 0.03  | 0.00  | 0.36  | -0.04 |
| 21 | 1 | 0.07  | 0.00  | 0.00  | 0.00  | -0.25 | 0.04  | -0.01 | 0.42  | -0.04 |
| 22 | 6 | 0.06  | 0.01  | 0.12  | 0.00  | -0.26 | 0.03  | 0.00  | -0.04 | 0.00  |
| 23 | 1 | 0.12  | 0.00  | 0.14  | 0.00  | -0.52 | 0.06  | -0.01 | -0.12 | 0.01  |
| 24 | 6 | 0.00  | 0.02  | 0.17  | 0.00  | 0.04  | -0.01 | 0.01  | -0.28 | 0.03  |
| 25 | 1 | -0.01 | 0.02  | 0.23  | 0.00  | 0.07  | -0.02 | 0.02  | -0.61 | 0.06  |
| 26 | 6 | -0.06 | 0.02  | 0.11  | 0.00  | 0.31  | -0.04 | 0.02  | -0.01 | 0.00  |
| 27 | 1 | -0.12 | 0.03  | 0.12  | 0.01  | 0.58  | -0.08 | 0.02  | -0.08 | 0.01  |
| 28 | 8 | -0.05 | 0.00  | 0.01  | -0.05 | -0.01 | 0.05  | -0.06 | -0.03 | -0.02 |
| 29 | 1 | 0.00  | 0.02  | 0.48  | 0.00  | 0.01  | -0.01 | 0.00  | 0.02  | -0.01 |
| 30 | 1 | -0.05 | -0.01 | -0.08 | -0.05 | -0.01 | 0.01  | -0.07 | -0.04 | -0.02 |

7  
A

8  
A

9  
A

|                |          |          |          |
|----------------|----------|----------|----------|
| Frequencies -- | 108.8565 | 118.6445 | 148.9925 |
| Red. masses -- | 6.2913   | 8.0943   | 6.1289   |
| Frc consts --  | 0.0439   | 0.0671   | 0.0802   |
| IR Inten --    | 7.3972   | 3.9431   | 9.2642   |
| Raman Activ -- | 0.1580   | 0.0805   | 0.2300   |
| Depolar (P) -- | 0.5919   | 0.6159   | 0.3885   |
| Depolar (U) -- | 0.7436   | 0.7623   | 0.5596   |

| Atom | AN | X     | Y     | Z     | X     | Y     | Z     | X     | Y     | Z     |
|------|----|-------|-------|-------|-------|-------|-------|-------|-------|-------|
| 1    | 6  | -0.03 | 0.00  | -0.03 | 0.06  | -0.01 | -0.02 | 0.02  | 0.00  | 0.09  |
| 2    | 6  | -0.02 | 0.00  | -0.09 | 0.03  | 0.00  | -0.07 | 0.02  | 0.00  | 0.15  |
| 3    | 6  | -0.02 | 0.00  | -0.03 | 0.06  | 0.01  | -0.04 | 0.01  | 0.00  | 0.08  |
| 4    | 6  | -0.02 | 0.00  | 0.03  | 0.06  | 0.01  | 0.01  | 0.01  | 0.00  | -0.03 |
| 5    | 1  | -0.02 | 0.00  | 0.08  | 0.06  | 0.01  | 0.04  | 0.01  | 0.00  | -0.10 |
| 6    | 6  | -0.03 | 0.00  | 0.04  | 0.07  | 0.00  | 0.04  | 0.01  | 0.00  | -0.07 |
| 7    | 6  | -0.03 | 0.01  | 0.02  | 0.06  | -0.01 | 0.03  | 0.02  | 0.00  | -0.01 |
| 8    | 1  | -0.03 | 0.01  | 0.06  | 0.05  | 0.00  | 0.07  | 0.02  | 0.00  | -0.07 |
| 9    | 6  | -0.05 | 0.00  | 0.07  | 0.12  | 0.02  | 0.03  | 0.01  | -0.01 | -0.01 |
| 10   | 8  | -0.08 | -0.01 | 0.22  | 0.12  | 0.09  | 0.11  | 0.03  | -0.04 | -0.12 |
| 11   | 6  | -0.01 | -0.01 | -0.16 | 0.01  | 0.00  | -0.09 | 0.01  | 0.01  | 0.18  |
| 12   | 8  | 0.02  | -0.03 | -0.17 | -0.01 | -0.04 | -0.09 | 0.03  | 0.03  | 0.17  |
| 13   | 8  | -0.03 | -0.01 | -0.17 | -0.02 | 0.02  | -0.11 | 0.01  | -0.01 | 0.19  |
| 14   | 6  | -0.04 | 0.01  | 0.06  | 0.12  | -0.02 | 0.03  | 0.00  | 0.01  | -0.01 |
| 15   | 8  | -0.02 | 0.04  | 0.20  | 0.14  | -0.07 | 0.11  | -0.01 | 0.02  | -0.10 |
| 16   | 8  | -0.08 | -0.01 | 0.02  | 0.17  | 0.01  | 0.01  | 0.00  | 0.01  | -0.02 |
| 17   | 1  | -0.08 | 0.00  | 0.11  | 0.21  | -0.02 | 0.08  | -0.02 | 0.01  | -0.11 |
| 18   | 7  | 0.01  | -0.01 | -0.15 | -0.28 | 0.01  | -0.06 | -0.13 | -0.03 | -0.25 |
| 19   | 1  | 0.02  | -0.03 | -0.21 | 0.01  | -0.02 | -0.08 | 0.03  | 0.01  | 0.02  |
| 20   | 7  | 0.19  | -0.01 | -0.13 | -0.21 | 0.00  | -0.05 | 0.08  | -0.02 | -0.22 |
| 21   | 1  | 0.28  | -0.02 | -0.25 | -0.20 | 0.00  | -0.08 | 0.16  | -0.04 | -0.33 |
| 22   | 6  | 0.26  | 0.00  | 0.05  | -0.19 | -0.01 | 0.03  | 0.15  | 0.00  | -0.01 |
| 23   | 1  | 0.42  | 0.00  | 0.10  | -0.13 | -0.02 | 0.05  | 0.34  | 0.01  | 0.04  |



|    |   |       |      |      |       |       |      |       |       |       |
|----|---|-------|------|------|-------|-------|------|-------|-------|-------|
| 24 | 6 | 0.09  | 0.02 | 0.17 | -0.26 | 0.00  | 0.08 | -0.05 | 0.01  | 0.13  |
| 25 | 1 | 0.08  | 0.03 | 0.32 | -0.26 | 0.00  | 0.14 | -0.06 | 0.03  | 0.31  |
| 26 | 6 | -0.07 | 0.01 | 0.03 | -0.31 | 0.01  | 0.02 | -0.22 | -0.01 | -0.04 |
| 27 | 1 | -0.22 | 0.02 | 0.05 | -0.38 | 0.02  | 0.03 | -0.41 | -0.01 | -0.01 |
| 28 | 8 | -0.04 | 0.00 | 0.01 | 0.19  | -0.02 | 0.01 | -0.02 | 0.01  | -0.02 |
| 29 | 1 | -0.03 | 0.01 | 0.09 | 0.07  | 0.00  | 0.08 | 0.01  | 0.00  | -0.17 |
| 30 | 1 | -0.07 | 0.00 | 0.12 | 0.23  | 0.01  | 0.06 | -0.01 | 0.01  | -0.12 |

|                |  |          |  |    |  |          |  |  |  |          |
|----------------|--|----------|--|----|--|----------|--|--|--|----------|
|                |  | 10       |  | 11 |  | 12       |  |  |  |          |
|                |  | A        |  | A  |  | A        |  |  |  |          |
| Frequencies -- |  | 162.8458 |  |    |  | 176.5209 |  |  |  | 181.3001 |
| Red. masses -- |  | 9.7533   |  |    |  | 6.7932   |  |  |  | 5.7367   |
| Frc consts --  |  | 0.1524   |  |    |  | 0.1247   |  |  |  | 0.1111   |
| IR Inten --    |  | 0.5791   |  |    |  | 0.2875   |  |  |  | 0.2772   |
| Raman Activ -- |  | 1.0806   |  |    |  | 0.7277   |  |  |  | 0.4638   |
| Depolar (P) -- |  | 0.7433   |  |    |  | 0.7499   |  |  |  | 0.7486   |
| Depolar (U) -- |  | 0.8527   |  |    |  | 0.8571   |  |  |  | 0.8562   |

| Atom | AN | X     | Y     | Z     | X     | Y     | Z     | X     | Y     | Z     |
|------|----|-------|-------|-------|-------|-------|-------|-------|-------|-------|
| 1    | 6  | 0.04  | -0.01 | -0.15 | -0.10 | 0.00  | -0.12 | 0.06  | -0.01 | -0.16 |
| 2    | 6  | 0.04  | 0.00  | -0.03 | -0.10 | 0.00  | 0.02  | 0.07  | 0.00  | -0.01 |
| 3    | 6  | 0.04  | 0.00  | 0.11  | -0.10 | 0.00  | 0.14  | 0.07  | 0.00  | 0.15  |
| 4    | 6  | 0.04  | 0.00  | 0.17  | -0.10 | 0.01  | 0.21  | 0.07  | 0.00  | 0.26  |
| 5    | 1  | 0.04  | 0.00  | 0.32  | -0.09 | 0.02  | 0.37  | 0.07  | 0.00  | 0.47  |
| 6    | 6  | 0.04  | 0.00  | 0.02  | -0.10 | 0.00  | -0.01 | 0.07  | 0.00  | 0.00  |
| 7    | 6  | 0.04  | 0.00  | -0.17 | -0.10 | -0.01 | -0.21 | 0.06  | 0.00  | -0.26 |
| 8    | 1  | 0.04  | 0.00  | -0.28 | -0.10 | -0.01 | -0.39 | 0.06  | 0.00  | -0.46 |
| 9    | 6  | 0.00  | -0.03 | -0.08 | 0.01  | 0.07  | -0.03 | -0.01 | -0.04 | -0.01 |
| 10   | 8  | 0.00  | -0.06 | -0.11 | 0.03  | 0.24  | 0.01  | -0.05 | -0.10 | 0.14  |
| 11   | 6  | 0.03  | -0.01 | -0.02 | -0.09 | 0.02  | 0.02  | 0.06  | 0.00  | 0.00  |
| 12   | 8  | 0.03  | 0.46  | -0.08 | -0.09 | 0.01  | 0.03  | 0.05  | -0.16 | 0.02  |
| 13   | 8  | 0.03  | -0.44 | 0.04  | -0.09 | 0.04  | 0.02  | 0.07  | 0.14  | -0.02 |
| 14   | 6  | 0.00  | 0.02  | 0.08  | 0.01  | -0.08 | 0.03  | -0.01 | 0.05  | 0.00  |
| 15   | 8  | 0.01  | 0.06  | 0.16  | 0.01  | -0.26 | -0.05 | -0.04 | 0.13  | -0.14 |
| 16   | 8  | -0.05 | 0.01  | -0.10 | 0.17  | 0.04  | -0.07 | -0.09 | 0.01  | -0.06 |
| 17   | 1  | -0.08 | 0.03  | -0.12 | 0.27  | -0.05 | -0.18 | -0.16 | 0.05  | -0.21 |
| 18   | 7  | -0.03 | -0.03 | 0.01  | 0.06  | -0.01 | -0.02 | -0.04 | 0.01  | 0.00  |
| 19   | 1  | 0.04  | 0.31  | -0.05 | -0.11 | 0.01  | 0.00  | 0.06  | -0.11 | 0.02  |
| 20   | 7  | -0.04 | 0.05  | 0.00  | 0.09  | -0.01 | -0.02 | -0.05 | -0.01 | 0.01  |
| 21   | 1  | -0.05 | -0.03 | 0.02  | 0.10  | -0.01 | -0.04 | -0.06 | 0.02  | 0.01  |
| 22   | 6  | -0.05 | 0.06  | -0.01 | 0.10  | 0.00  | 0.00  | -0.05 | -0.02 | 0.00  |
| 23   | 1  | -0.05 | 0.11  | -0.01 | 0.12  | 0.00  | 0.00  | -0.06 | -0.03 | 0.00  |
| 24   | 6  | -0.04 | -0.02 | 0.00  | 0.08  | 0.01  | 0.01  | -0.05 | 0.00  | 0.00  |
| 25   | 1  | -0.04 | -0.03 | -0.01 | 0.07  | 0.02  | 0.03  | -0.05 | 0.00  | -0.01 |
| 26   | 6  | -0.03 | -0.07 | 0.01  | 0.05  | 0.00  | -0.01 | -0.04 | 0.02  | 0.00  |
| 27   | 1  | -0.03 | -0.13 | 0.02  | 0.04  | 0.00  | -0.01 | -0.04 | 0.04  | 0.00  |
| 28   | 8  | -0.06 | -0.02 | 0.11  | 0.15  | -0.06 | 0.06  | -0.08 | -0.01 | 0.06  |
| 29   | 1  | 0.04  | 0.00  | 0.04  | -0.10 | 0.00  | -0.02 | 0.07  | 0.00  | 0.01  |
| 30   | 1  | -0.09 | -0.03 | 0.17  | 0.25  | 0.02  | 0.15  | -0.14 | -0.04 | 0.22  |

|                |  |          |  |    |  |          |  |  |  |          |
|----------------|--|----------|--|----|--|----------|--|--|--|----------|
|                |  | 13       |  | 14 |  | 15       |  |  |  |          |
|                |  | A        |  | A  |  | A        |  |  |  |          |
| Frequencies -- |  | 209.7316 |  |    |  | 221.9707 |  |  |  | 275.4302 |
| Red. masses -- |  | 10.7709  |  |    |  | 7.2187   |  |  |  | 7.2527   |
| Frc consts --  |  | 0.2791   |  |    |  | 0.2096   |  |  |  | 0.3242   |
| IR Inten --    |  | 0.1497   |  |    |  | 23.5505  |  |  |  | 1.6640   |
| Raman Activ -- |  | 0.1100   |  |    |  | 2.0388   |  |  |  | 1.6426   |
| Depolar (P) -- |  | 0.7376   |  |    |  | 0.7385   |  |  |  | 0.7500   |
| Depolar (U) -- |  | 0.8490   |  |    |  | 0.8496   |  |  |  | 0.8571   |

| Atom | AN | X     | Y     | Z    | X     | Y     | Z     | X     | Y     | Z    |
|------|----|-------|-------|------|-------|-------|-------|-------|-------|------|
| 1    | 6  | 0.04  | -0.06 | 0.01 | -0.01 | 0.00  | -0.22 | -0.17 | -0.10 | 0.03 |
| 2    | 6  | 0.01  | -0.04 | 0.01 | 0.00  | -0.01 | -0.27 | -0.01 | -0.17 | 0.06 |
| 3    | 6  | -0.02 | -0.06 | 0.00 | 0.00  | -0.01 | -0.24 | 0.16  | -0.09 | 0.03 |

|    |   |       |       |       |       |       |       |       |       |       |
|----|---|-------|-------|-------|-------|-------|-------|-------|-------|-------|
| 4  | 6 | -0.01 | -0.06 | -0.01 | 0.00  | 0.00  | 0.00  | 0.16  | 0.06  | 0.00  |
| 5  | 1 | -0.02 | -0.06 | -0.02 | 0.00  | 0.00  | 0.12  | 0.27  | 0.11  | -0.03 |
| 6  | 6 | 0.01  | -0.08 | 0.00  | -0.01 | 0.00  | 0.20  | 0.01  | 0.17  | 0.00  |
| 7  | 6 | 0.03  | -0.06 | 0.01  | -0.01 | 0.00  | 0.03  | -0.16 | 0.06  | 0.02  |
| 8  | 1 | 0.04  | -0.07 | 0.01  | -0.01 | 0.00  | 0.17  | -0.29 | 0.13  | 0.00  |
| 9  | 6 | -0.06 | -0.11 | 0.02  | -0.02 | 0.00  | -0.06 | -0.11 | -0.06 | 0.00  |
| 10 | 8 | -0.09 | -0.23 | 0.06  | -0.03 | 0.05  | 0.06  | -0.07 | 0.19  | -0.03 |
| 11 | 6 | 0.02  | 0.25  | -0.01 | 0.01  | 0.01  | 0.04  | -0.02 | -0.07 | 0.02  |
| 12 | 8 | 0.01  | 0.42  | -0.03 | -0.24 | 0.01  | 0.18  | 0.01  | 0.11  | -0.01 |
| 13 | 8 | 0.04  | 0.46  | -0.03 | 0.29  | 0.02  | 0.20  | -0.03 | 0.11  | -0.01 |
| 14 | 6 | 0.05  | -0.11 | 0.00  | 0.00  | 0.00  | -0.06 | 0.12  | -0.05 | 0.00  |
| 15 | 8 | 0.06  | -0.19 | 0.03  | 0.02  | 0.02  | 0.07  | 0.09  | 0.21  | -0.02 |
| 16 | 8 | 0.14  | -0.06 | -0.01 | -0.01 | -0.03 | 0.04  | -0.11 | -0.20 | -0.01 |
| 17 | 1 | 0.20  | -0.10 | 0.00  | -0.01 | -0.02 | 0.24  | -0.28 | -0.08 | -0.04 |
| 18 | 7 | -0.01 | -0.09 | 0.00  | -0.01 | -0.01 | -0.06 | 0.00  | -0.02 | 0.00  |
| 19 | 1 | 0.01  | 0.38  | -0.03 | -0.25 | 0.01  | 0.23  | 0.01  | 0.16  | -0.03 |
| 20 | 7 | -0.01 | -0.09 | 0.00  | 0.02  | -0.01 | -0.06 | 0.00  | -0.02 | 0.00  |
| 21 | 1 | -0.01 | 0.02  | -0.01 | 0.02  | -0.01 | -0.05 | 0.00  | 0.02  | 0.00  |
| 22 | 6 | -0.01 | 0.01  | 0.00  | 0.02  | -0.01 | -0.05 | 0.00  | 0.00  | 0.00  |
| 23 | 1 | 0.00  | 0.04  | -0.01 | 0.03  | -0.01 | -0.05 | 0.00  | 0.01  | 0.00  |
| 24 | 6 | -0.01 | 0.05  | -0.01 | 0.01  | -0.01 | -0.04 | 0.00  | 0.01  | 0.00  |
| 25 | 1 | -0.01 | 0.12  | -0.01 | 0.01  | -0.01 | -0.03 | 0.00  | 0.03  | 0.00  |
| 26 | 6 | -0.01 | -0.02 | 0.00  | -0.01 | -0.01 | -0.06 | 0.00  | -0.01 | 0.00  |
| 27 | 1 | -0.02 | -0.02 | 0.00  | -0.02 | -0.01 | -0.05 | 0.00  | 0.00  | 0.00  |
| 28 | 8 | -0.17 | -0.03 | -0.02 | 0.01  | -0.03 | 0.03  | 0.11  | -0.24 | -0.02 |
| 29 | 1 | 0.01  | -0.10 | -0.01 | -0.01 | 0.01  | 0.50  | 0.01  | 0.33  | -0.02 |
| 30 | 1 | -0.26 | -0.09 | -0.01 | 0.00  | -0.02 | 0.21  | 0.31  | -0.12 | -0.05 |

16

17

18

A

A

A

|                |          |          |          |
|----------------|----------|----------|----------|
| Frequencies -- | 313.1193 | 375.3978 | 379.9374 |
| Red. masses -- | 10.5287  | 7.0131   | 6.9915   |
| Frc consts --  | 0.6082   | 0.5823   | 0.5946   |
| IR Inten --    | 0.0122   | 23.0477  | 10.8695  |
| Raman Activ -- | 3.0560   | 3.9705   | 1.0029   |
| Depolar (P) -- | 0.7117   | 0.1326   | 0.1402   |
| Depolar (U) -- | 0.8316   | 0.2341   | 0.2459   |

| Atom | AN | X     | Y     | Z     | X     | Y     | Z     | X     | Y     | Z     |
|------|----|-------|-------|-------|-------|-------|-------|-------|-------|-------|
| 1    | 6  | 0.02  | -0.11 | -0.01 | -0.04 | -0.02 | -0.16 | -0.04 | -0.01 | 0.17  |
| 2    | 6  | -0.13 | 0.02  | -0.01 | 0.03  | 0.02  | 0.05  | 0.02  | -0.02 | -0.07 |
| 3    | 6  | 0.00  | 0.13  | -0.01 | -0.06 | 0.03  | -0.09 | -0.03 | 0.01  | 0.22  |
| 4    | 6  | 0.00  | 0.06  | 0.00  | -0.08 | -0.02 | -0.12 | -0.02 | 0.04  | 0.05  |
| 5    | 1  | -0.08 | 0.02  | 0.00  | -0.08 | -0.01 | -0.21 | 0.01  | 0.06  | 0.03  |
| 6    | 6  | 0.08  | -0.02 | 0.00  | -0.08 | -0.02 | 0.14  | -0.05 | 0.06  | -0.21 |
| 7    | 6  | 0.02  | -0.06 | 0.00  | -0.05 | -0.01 | 0.00  | -0.05 | 0.05  | 0.13  |
| 8    | 1  | -0.05 | -0.02 | 0.00  | -0.03 | -0.02 | 0.05  | -0.08 | 0.07  | 0.21  |
| 9    | 6  | 0.08  | -0.20 | 0.00  | -0.11 | -0.08 | -0.10 | -0.05 | -0.07 | 0.07  |
| 10   | 8  | 0.07  | -0.29 | 0.01  | -0.11 | 0.04  | 0.01  | -0.03 | -0.02 | -0.02 |
| 11   | 6  | -0.23 | 0.01  | 0.00  | 0.13  | 0.01  | 0.11  | 0.10  | -0.02 | -0.16 |
| 12   | 8  | -0.28 | 0.01  | 0.03  | 0.35  | -0.01 | 0.00  | -0.10 | -0.01 | -0.07 |
| 13   | 8  | -0.25 | 0.00  | 0.00  | 0.01  | 0.00  | 0.03  | 0.38  | -0.01 | -0.01 |
| 14   | 6  | 0.07  | 0.21  | 0.00  | -0.09 | 0.09  | -0.03 | -0.09 | 0.05  | 0.12  |
| 15   | 8  | 0.07  | 0.25  | -0.01 | -0.08 | -0.01 | 0.02  | -0.10 | -0.05 | -0.02 |
| 16   | 8  | 0.14  | 0.28  | 0.00  | 0.08  | 0.23  | 0.02  | 0.02  | 0.17  | -0.02 |
| 17   | 1  | 0.24  | 0.21  | -0.02 | 0.26  | 0.10  | 0.08  | 0.11  | 0.08  | -0.29 |
| 18   | 7  | 0.03  | 0.00  | 0.00  | -0.01 | 0.00  | 0.00  | -0.02 | 0.00  | 0.00  |
| 19   | 1  | -0.31 | 0.00  | 0.07  | 0.38  | -0.03 | -0.14 | -0.09 | 0.01  | 0.05  |
| 20   | 7  | 0.05  | 0.00  | 0.00  | -0.03 | 0.00  | 0.01  | -0.01 | 0.00  | 0.00  |
| 21   | 1  | 0.07  | 0.00  | -0.03 | -0.04 | 0.00  | 0.02  | -0.02 | 0.00  | 0.01  |
| 22   | 6  | 0.06  | 0.00  | -0.01 | -0.03 | 0.00  | 0.01  | -0.02 | 0.00  | -0.01 |
| 23   | 1  | 0.06  | 0.00  | -0.01 | -0.02 | 0.00  | 0.01  | -0.03 | 0.00  | -0.01 |

|    |   |      |       |       |       |       |      |       |       |       |
|----|---|------|-------|-------|-------|-------|------|-------|-------|-------|
| 24 | 6 | 0.05 | 0.00  | -0.01 | -0.03 | 0.00  | 0.01 | -0.02 | 0.00  | -0.02 |
| 25 | 1 | 0.05 | 0.00  | 0.00  | -0.03 | 0.00  | 0.01 | -0.01 | 0.00  | -0.02 |
| 26 | 6 | 0.04 | 0.00  | -0.01 | -0.02 | 0.00  | 0.02 | -0.01 | 0.00  | -0.01 |
| 27 | 1 | 0.05 | 0.00  | -0.01 | -0.03 | 0.00  | 0.02 | 0.00  | 0.00  | -0.01 |
| 28 | 8 | 0.11 | -0.25 | 0.01  | 0.05  | -0.26 | 0.01 | 0.06  | -0.15 | -0.02 |
| 29 | 1 | 0.08 | -0.03 | 0.01  | -0.08 | -0.03 | 0.35 | -0.05 | 0.07  | -0.53 |
| 30 | 1 | 0.17 | -0.21 | 0.04  | 0.21  | -0.13 | 0.23 | 0.19  | -0.08 | -0.18 |

19  
A

20  
A

21  
A

|                |          |          |          |
|----------------|----------|----------|----------|
| Frequencies -- | 409.1344 | 441.1701 | 538.9746 |
| Red. masses -- | 7.8733   | 3.3084   | 7.3089   |
| Frc consts --  | 0.7765   | 0.3794   | 1.2509   |
| IR Inten --    | 8.3638   | 0.2741   | 8.7593   |
| Raman Activ -- | 3.2014   | 1.3643   | 8.5982   |
| Depolar (P) -- | 0.7392   | 0.5095   | 0.2284   |
| Depolar (U) -- | 0.8500   | 0.6750   | 0.3718   |

| Atom | AN | X     | Y     | Z     | X     | Y     | Z     | X     | Y     | Z     |
|------|----|-------|-------|-------|-------|-------|-------|-------|-------|-------|
| 1    | 6  | 0.07  | 0.03  | -0.04 | -0.04 | 0.00  | 0.22  | 0.12  | -0.01 | 0.08  |
| 2    | 6  | 0.00  | 0.07  | -0.01 | -0.01 | -0.01 | 0.00  | 0.12  | -0.03 | 0.02  |
| 3    | 6  | -0.06 | 0.03  | -0.06 | -0.03 | 0.00  | -0.22 | 0.14  | -0.02 | -0.08 |
| 4    | 6  | -0.02 | 0.30  | -0.01 | -0.04 | 0.00  | 0.15  | 0.24  | -0.02 | 0.01  |
| 5    | 1  | 0.09  | 0.35  | 0.01  | -0.03 | 0.00  | 0.41  | 0.25  | -0.03 | 0.05  |
| 6    | 6  | 0.02  | 0.32  | 0.04  | -0.05 | 0.00  | 0.00  | 0.29  | 0.00  | 0.01  |
| 7    | 6  | 0.05  | 0.29  | -0.04 | -0.05 | -0.01 | -0.15 | 0.20  | 0.00  | -0.03 |
| 8    | 1  | -0.08 | 0.37  | -0.05 | -0.05 | -0.01 | -0.40 | 0.18  | 0.02  | -0.10 |
| 9    | 6  | 0.11  | -0.09 | 0.00  | -0.01 | -0.01 | 0.14  | -0.13 | -0.02 | 0.03  |
| 10   | 8  | 0.10  | -0.24 | 0.01  | 0.02  | -0.03 | -0.04 | -0.11 | 0.20  | -0.02 |
| 11   | 6  | 0.00  | 0.08  | 0.02  | 0.02  | -0.01 | 0.00  | -0.02 | -0.02 | 0.00  |
| 12   | 8  | 0.03  | -0.01 | 0.01  | 0.05  | 0.00  | -0.01 | -0.13 | 0.02  | 0.06  |
| 13   | 8  | -0.05 | -0.02 | 0.01  | 0.05  | 0.00  | 0.01  | -0.12 | 0.00  | -0.06 |
| 14   | 6  | -0.11 | -0.10 | -0.02 | -0.01 | 0.02  | -0.14 | -0.16 | 0.04  | -0.03 |
| 15   | 8  | -0.10 | -0.23 | 0.01  | 0.02  | 0.04  | 0.05  | -0.16 | -0.20 | 0.02  |
| 16   | 8  | -0.15 | -0.13 | 0.01  | 0.02  | 0.02  | 0.01  | -0.07 | 0.15  | 0.01  |
| 17   | 1  | -0.21 | -0.08 | 0.11  | 0.11  | -0.01 | 0.47  | 0.09  | 0.06  | 0.35  |
| 18   | 7  | 0.00  | 0.00  | 0.00  | 0.00  | 0.00  | 0.00  | 0.00  | 0.00  | 0.00  |
| 19   | 1  | 0.03  | -0.05 | -0.01 | 0.05  | 0.00  | -0.03 | -0.14 | 0.04  | 0.14  |
| 20   | 7  | 0.00  | 0.00  | 0.00  | 0.00  | 0.00  | 0.00  | 0.01  | 0.00  | 0.00  |
| 21   | 1  | 0.00  | -0.01 | 0.00  | -0.01 | 0.00  | 0.01  | 0.02  | 0.00  | -0.02 |
| 22   | 6  | 0.00  | 0.00  | 0.00  | -0.01 | 0.00  | 0.00  | 0.01  | 0.00  | 0.00  |
| 23   | 1  | 0.00  | 0.00  | 0.00  | -0.01 | 0.00  | 0.00  | 0.02  | 0.00  | 0.00  |
| 24   | 6  | 0.00  | 0.00  | 0.00  | 0.00  | 0.00  | 0.00  | 0.01  | 0.00  | 0.00  |
| 25   | 1  | 0.00  | 0.00  | 0.00  | 0.00  | 0.00  | 0.00  | 0.01  | 0.00  | 0.01  |
| 26   | 6  | 0.00  | 0.00  | 0.00  | 0.00  | 0.00  | 0.00  | 0.00  | 0.00  | -0.01 |
| 27   | 1  | 0.00  | 0.00  | 0.00  | 0.00  | 0.00  | 0.00  | 0.00  | 0.00  | -0.01 |
| 28   | 8  | 0.13  | -0.11 | 0.02  | 0.01  | -0.01 | -0.01 | -0.09 | -0.10 | -0.01 |
| 29   | 1  | 0.01  | 0.25  | 0.11  | -0.05 | 0.00  | 0.00  | 0.29  | 0.02  | 0.02  |
| 30   | 1  | 0.17  | -0.08 | 0.07  | 0.11  | 0.01  | -0.47 | 0.04  | -0.05 | -0.36 |

22  
A

23  
A

24  
A

|                |          |          |          |
|----------------|----------|----------|----------|
| Frequencies -- | 545.9700 | 573.8281 | 598.5294 |
| Red. masses -- | 5.8333   | 1.3600   | 2.6885   |
| Frc consts --  | 1.0245   | 0.2639   | 0.5675   |
| IR Inten --    | 24.4800  | 142.4403 | 21.5317  |
| Raman Activ -- | 1.2492   | 0.2693   | 0.1856   |
| Depolar (P) -- | 0.6662   | 0.7477   | 0.7360   |
| Depolar (U) -- | 0.7997   | 0.8556   | 0.8479   |

| Atom | AN | X     | Y    | Z     | X     | Y     | Z     | X     | Y    | Z    |
|------|----|-------|------|-------|-------|-------|-------|-------|------|------|
| 1    | 6  | 0.11  | 0.11 | 0.05  | -0.01 | -0.01 | 0.00  | 0.01  | 0.02 | 0.08 |
| 2    | 6  | 0.02  | 0.22 | -0.01 | 0.00  | -0.03 | -0.01 | 0.00  | 0.02 | 0.20 |
| 3    | 6  | -0.08 | 0.12 | 0.02  | 0.01  | -0.01 | 0.01  | -0.01 | 0.01 | 0.09 |

|    |   |       |       |       |       |       |       |       |       |       |
|----|---|-------|-------|-------|-------|-------|-------|-------|-------|-------|
| 4  | 6 | -0.15 | 0.02  | 0.09  | 0.02  | 0.00  | 0.07  | -0.02 | 0.00  | -0.12 |
| 5  | 1 | -0.28 | -0.05 | 0.14  | 0.04  | 0.01  | 0.14  | -0.03 | 0.00  | -0.47 |
| 6  | 6 | 0.02  | -0.09 | -0.09 | 0.00  | 0.01  | -0.08 | -0.01 | 0.00  | 0.17  |
| 7  | 6 | 0.19  | 0.01  | 0.08  | -0.02 | 0.00  | 0.07  | 0.01  | 0.00  | -0.12 |
| 8  | 1 | 0.32  | -0.07 | 0.10  | -0.04 | 0.01  | 0.15  | 0.03  | -0.01 | -0.45 |
| 9  | 6 | -0.14 | -0.01 | -0.04 | 0.02  | 0.00  | -0.05 | 0.00  | 0.00  | -0.03 |
| 10 | 8 | -0.16 | 0.07  | -0.02 | 0.01  | 0.00  | 0.00  | -0.01 | 0.00  | 0.00  |
| 11 | 6 | 0.00  | 0.20  | -0.02 | 0.00  | -0.02 | 0.02  | 0.01  | -0.01 | -0.08 |
| 12 | 8 | -0.01 | -0.05 | 0.02  | 0.02  | 0.01  | 0.01  | -0.09 | -0.01 | -0.05 |
| 13 | 8 | -0.02 | -0.07 | 0.01  | -0.02 | 0.01  | 0.01  | 0.10  | -0.01 | -0.03 |
| 14 | 6 | 0.12  | -0.01 | -0.05 | -0.02 | 0.00  | -0.05 | 0.01  | 0.00  | -0.03 |
| 15 | 8 | 0.14  | 0.02  | -0.01 | -0.01 | 0.00  | 0.00  | 0.01  | 0.00  | 0.00  |
| 16 | 8 | -0.03 | -0.17 | -0.02 | 0.00  | 0.02  | -0.04 | -0.01 | -0.01 | -0.02 |
| 17 | 1 | -0.23 | -0.01 | 0.28  | 0.13  | -0.03 | 0.67  | 0.04  | -0.01 | 0.49  |
| 18 | 7 | 0.00  | 0.00  | 0.00  | 0.00  | 0.00  | 0.00  | -0.01 | 0.00  | 0.00  |
| 19 | 1 | -0.01 | -0.16 | 0.04  | 0.02  | 0.02  | -0.01 | -0.09 | 0.00  | 0.04  |
| 20 | 7 | 0.00  | 0.02  | 0.00  | 0.00  | 0.00  | 0.00  | 0.00  | 0.00  | 0.00  |
| 21 | 1 | 0.00  | -0.05 | 0.00  | 0.00  | 0.00  | 0.00  | 0.01  | 0.00  | 0.00  |
| 22 | 6 | 0.00  | 0.00  | 0.00  | 0.00  | 0.00  | 0.00  | 0.00  | 0.00  | 0.00  |
| 23 | 1 | 0.00  | -0.01 | 0.00  | 0.00  | 0.00  | 0.00  | 0.00  | 0.00  | 0.00  |
| 24 | 6 | 0.00  | 0.00  | 0.00  | 0.00  | 0.00  | 0.00  | 0.00  | 0.00  | 0.00  |
| 25 | 1 | 0.00  | -0.01 | 0.00  | 0.00  | 0.00  | 0.00  | 0.00  | 0.00  | 0.00  |
| 26 | 6 | 0.00  | 0.01  | 0.00  | 0.00  | 0.00  | 0.00  | 0.00  | 0.00  | 0.00  |
| 27 | 1 | 0.00  | 0.01  | 0.00  | 0.00  | 0.00  | 0.00  | 0.00  | 0.00  | 0.00  |
| 28 | 8 | 0.00  | -0.20 | -0.01 | 0.01  | 0.02  | -0.04 | 0.01  | -0.01 | -0.02 |
| 29 | 1 | 0.01  | -0.29 | -0.25 | 0.00  | 0.04  | -0.18 | -0.01 | -0.02 | 0.16  |
| 30 | 1 | 0.24  | -0.03 | 0.13  | -0.16 | -0.03 | 0.63  | -0.05 | -0.01 | 0.40  |

25  
A

26  
A

27  
A

|                |          |          |          |
|----------------|----------|----------|----------|
| Frequencies -- | 604.9771 | 629.3275 | 655.7220 |
| Red. masses -- | 1.3317   | 3.4156   | 4.6756   |
| Frc consts --  | 0.2872   | 0.7970   | 1.1845   |
| IR Inten --    | 4.3369   | 11.3077  | 132.3157 |
| Raman Activ -- | 3.7900   | 0.1452   | 0.4104   |
| Depolar (P) -- | 0.7251   | 0.7498   | 0.7500   |
| Depolar (U) -- | 0.8406   | 0.8570   | 0.8571   |

| Atom | AN | X     | Y     | Z     | X     | Y     | Z     | X     | Y     | Z     |
|------|----|-------|-------|-------|-------|-------|-------|-------|-------|-------|
| 1    | 6  | 0.00  | 0.00  | -0.10 | 0.00  | 0.00  | 0.00  | 0.10  | -0.11 | 0.01  |
| 2    | 6  | -0.01 | 0.00  | -0.01 | 0.00  | 0.00  | 0.00  | 0.00  | -0.07 | 0.01  |
| 3    | 6  | 0.00  | 0.00  | 0.09  | 0.00  | 0.00  | 0.00  | -0.11 | -0.11 | 0.00  |
| 4    | 6  | -0.01 | 0.00  | -0.02 | 0.00  | 0.00  | 0.00  | -0.13 | 0.11  | 0.00  |
| 5    | 1  | -0.01 | 0.00  | -0.09 | 0.01  | 0.00  | 0.00  | -0.06 | 0.14  | -0.01 |
| 6    | 6  | -0.01 | 0.00  | 0.00  | 0.00  | 0.00  | 0.00  | 0.00  | 0.05  | 0.00  |
| 7    | 6  | -0.01 | 0.00  | 0.02  | 0.00  | 0.00  | 0.00  | 0.14  | 0.10  | 0.00  |
| 8    | 1  | -0.01 | 0.00  | 0.11  | -0.01 | 0.00  | 0.00  | 0.07  | 0.14  | -0.02 |
| 9    | 6  | 0.01  | 0.00  | 0.01  | 0.00  | 0.00  | 0.00  | 0.06  | -0.14 | 0.00  |
| 10   | 8  | 0.01  | -0.01 | 0.02  | 0.00  | 0.00  | 0.00  | 0.10  | 0.17  | 0.03  |
| 11   | 6  | 0.00  | 0.00  | 0.00  | 0.00  | 0.00  | 0.00  | 0.00  | 0.04  | -0.01 |
| 12   | 8  | 0.01  | 0.00  | 0.00  | 0.00  | 0.00  | 0.00  | 0.00  | -0.02 | 0.00  |
| 13   | 8  | 0.00  | 0.00  | 0.00  | 0.00  | 0.00  | 0.00  | 0.00  | -0.02 | 0.00  |
| 14   | 6  | 0.01  | 0.00  | 0.00  | 0.00  | 0.00  | 0.00  | -0.07 | -0.14 | 0.00  |
| 15   | 8  | 0.00  | 0.01  | -0.02 | 0.00  | 0.00  | 0.00  | -0.09 | 0.18  | 0.02  |
| 16   | 8  | 0.00  | -0.01 | -0.05 | 0.00  | 0.00  | 0.00  | 0.15  | -0.05 | -0.02 |
| 17   | 1  | 0.10  | -0.03 | 0.65  | 0.00  | 0.00  | 0.01  | 0.47  | -0.29 | -0.10 |
| 18   | 7  | 0.00  | 0.00  | 0.00  | 0.00  | -0.06 | 0.01  | 0.00  | -0.01 | 0.00  |
| 19   | 1  | 0.01  | 0.00  | -0.01 | 0.00  | -0.03 | 0.00  | 0.00  | -0.02 | 0.00  |
| 20   | 7  | 0.00  | 0.00  | 0.00  | 0.00  | 0.23  | -0.03 | 0.00  | 0.01  | 0.00  |
| 21   | 1  | 0.00  | 0.00  | 0.00  | 0.00  | -0.07 | 0.01  | 0.00  | 0.00  | 0.00  |
| 22   | 6  | 0.00  | 0.00  | 0.00  | 0.00  | -0.26 | 0.03  | 0.00  | 0.00  | 0.00  |
| 23   | 1  | 0.00  | 0.00  | 0.00  | 0.01  | -0.71 | 0.09  | 0.00  | 0.00  | 0.00  |

|    |   |       |      |       |       |       |       |       |       |       |
|----|---|-------|------|-------|-------|-------|-------|-------|-------|-------|
| 24 | 6 | 0.00  | 0.00 | 0.00  | 0.00  | 0.25  | -0.03 | 0.00  | 0.00  | 0.00  |
| 25 | 1 | 0.00  | 0.00 | 0.00  | -0.01 | 0.37  | -0.05 | 0.00  | 0.00  | 0.00  |
| 26 | 6 | 0.00  | 0.00 | 0.00  | 0.00  | -0.12 | 0.02  | 0.00  | 0.00  | 0.00  |
| 27 | 1 | 0.00  | 0.00 | 0.00  | 0.00  | -0.37 | 0.05  | 0.00  | 0.01  | 0.00  |
| 28 | 8 | -0.01 | 0.01 | 0.05  | 0.00  | 0.00  | 0.00  | -0.15 | -0.04 | -0.03 |
| 29 | 1 | -0.01 | 0.00 | 0.00  | 0.00  | 0.01  | 0.00  | 0.00  | -0.16 | -0.01 |
| 30 | 1 | 0.13  | 0.03 | -0.71 | 0.00  | 0.00  | -0.01 | -0.49 | -0.26 | -0.12 |

28

A

29

A

30

A

|                |          |          |          |
|----------------|----------|----------|----------|
| Frequencies -- | 671.7280 | 674.4960 | 736.3658 |
| Red. masses -- | 4.7341   | 5.4219   | 5.4493   |
| Frc consts --  | 1.2586   | 1.4533   | 1.7409   |
| IR Inten --    | 10.4683  | 0.3058   | 79.0514  |
| Raman Activ -- | 5.0313   | 0.3383   | 0.1718   |
| Depolar (P) -- | 0.1604   | 0.7155   | 0.6001   |
| Depolar (U) -- | 0.2764   | 0.8342   | 0.7501   |

| Atom | AN | X     | Y     | Z     | X     | Y     | Z     | X     | Y     | Z     |
|------|----|-------|-------|-------|-------|-------|-------|-------|-------|-------|
| 1    | 6  | 0.04  | 0.13  | 0.00  | 0.01  | 0.00  | 0.00  | -0.01 | 0.00  | 0.08  |
| 2    | 6  | 0.17  | -0.01 | 0.00  | -0.01 | 0.00  | 0.00  | 0.01  | 0.02  | -0.27 |
| 3    | 6  | 0.03  | -0.14 | 0.00  | -0.01 | 0.01  | 0.00  | 0.02  | 0.00  | 0.08  |
| 4    | 6  | 0.01  | -0.12 | 0.00  | -0.01 | 0.01  | 0.00  | 0.02  | -0.02 | -0.13 |
| 5    | 1  | 0.18  | -0.03 | 0.01  | -0.03 | 0.01  | 0.00  | 0.02  | -0.02 | 0.07  |
| 6    | 6  | -0.16 | 0.01  | 0.00  | 0.01  | 0.00  | 0.00  | 0.00  | 0.00  | 0.07  |
| 7    | 6  | 0.03  | 0.12  | 0.00  | 0.01  | 0.00  | 0.00  | -0.02 | -0.01 | -0.13 |
| 8    | 1  | 0.18  | 0.02  | 0.01  | 0.01  | 0.00  | 0.00  | -0.01 | -0.02 | 0.07  |
| 9    | 6  | -0.07 | 0.12  | -0.01 | 0.00  | -0.01 | 0.00  | -0.05 | -0.02 | 0.31  |
| 10   | 8  | -0.11 | -0.12 | -0.02 | 0.00  | 0.01  | 0.00  | 0.02  | 0.01  | -0.09 |
| 11   | 6  | 0.10  | -0.01 | 0.00  | 0.00  | -0.02 | 0.00  | 0.00  | 0.13  | 0.02  |
| 12   | 8  | -0.08 | 0.02  | 0.11  | 0.00  | -0.01 | 0.00  | 0.05  | -0.02 | 0.04  |
| 13   | 8  | -0.08 | -0.01 | -0.11 | 0.00  | 0.00  | 0.00  | -0.05 | -0.03 | 0.02  |
| 14   | 6  | -0.08 | -0.11 | 0.00  | 0.01  | 0.00  | 0.00  | 0.04  | -0.02 | 0.31  |
| 15   | 8  | -0.10 | 0.12  | 0.02  | 0.01  | 0.00  | 0.00  | -0.02 | 0.01  | -0.09 |
| 16   | 8  | 0.13  | -0.03 | -0.02 | 0.00  | 0.00  | 0.00  | -0.01 | -0.01 | -0.10 |
| 17   | 1  | 0.44  | -0.26 | -0.07 | -0.03 | 0.01  | -0.01 | 0.08  | -0.04 | 0.40  |
| 18   | 7  | -0.01 | 0.02  | 0.00  | 0.00  | 0.39  | -0.05 | 0.00  | 0.01  | 0.00  |
| 19   | 1  | -0.07 | 0.05  | 0.26  | 0.00  | 0.17  | -0.04 | 0.05  | -0.09 | 0.00  |
| 20   | 7  | 0.00  | -0.01 | 0.00  | 0.00  | -0.27 | 0.03  | 0.00  | 0.00  | 0.00  |
| 21   | 1  | 0.02  | 0.00  | -0.03 | 0.00  | 0.13  | -0.02 | 0.00  | -0.05 | 0.01  |
| 22   | 6  | 0.01  | 0.00  | 0.00  | 0.00  | 0.03  | 0.00  | 0.00  | 0.00  | 0.00  |
| 23   | 1  | 0.01  | 0.00  | 0.00  | 0.00  | 0.03  | 0.00  | 0.00  | 0.01  | 0.00  |
| 24   | 6  | 0.01  | 0.01  | 0.00  | 0.00  | 0.18  | -0.02 | 0.00  | 0.00  | 0.00  |
| 25   | 1  | 0.01  | 0.01  | 0.00  | 0.00  | 0.27  | -0.03 | 0.00  | 0.01  | 0.00  |
| 26   | 6  | 0.00  | -0.01 | -0.01 | 0.00  | -0.31 | 0.04  | 0.00  | -0.01 | 0.00  |
| 27   | 1  | 0.00  | -0.03 | 0.00  | 0.01  | -0.71 | 0.09  | 0.00  | -0.01 | 0.00  |
| 28   | 8  | 0.13  | 0.02  | 0.03  | -0.01 | 0.00  | 0.00  | 0.01  | -0.01 | -0.10 |
| 29   | 1  | -0.16 | 0.00  | -0.01 | 0.01  | -0.02 | -0.01 | 0.00  | 0.04  | 0.49  |
| 30   | 1  | 0.45  | 0.23  | 0.08  | -0.02 | -0.01 | -0.01 | -0.11 | -0.04 | 0.41  |

31

A

32

A

33

A

|                |          |          |          |
|----------------|----------|----------|----------|
| Frequencies -- | 744.1085 | 765.9607 | 768.1628 |
| Red. masses -- | 4.9917   | 3.1659   | 1.3711   |
| Frc consts --  | 1.6284   | 1.0944   | 0.4767   |
| IR Inten --    | 9.4573   | 31.9210  | 37.5534  |
| Raman Activ -- | 18.9309  | 0.8721   | 0.0774   |
| Depolar (P) -- | 0.0283   | 0.7397   | 0.7478   |
| Depolar (U) -- | 0.0551   | 0.8504   | 0.8557   |

| Atom | AN | X     | Y    | Z     | X     | Y     | Z     | X     | Y     | Z    |
|------|----|-------|------|-------|-------|-------|-------|-------|-------|------|
| 1    | 6  | -0.03 | 0.00 | 0.02  | -0.06 | -0.01 | 0.01  | 0.02  | 0.00  | 0.00 |
| 2    | 6  | -0.14 | 0.01 | -0.01 | 0.00  | 0.03  | -0.01 | 0.00  | -0.01 | 0.01 |
| 3    | 6  | -0.03 | 0.01 | -0.01 | 0.06  | -0.02 | 0.01  | -0.02 | 0.00  | 0.00 |

|    |   |       |       |       |       |       |       |       |       |       |
|----|---|-------|-------|-------|-------|-------|-------|-------|-------|-------|
| 4  | 6 | 0.06  | 0.09  | 0.00  | 0.11  | -0.07 | 0.02  | -0.03 | 0.02  | -0.01 |
| 5  | 1 | -0.04 | 0.03  | -0.01 | 0.15  | -0.05 | -0.19 | -0.05 | 0.02  | 0.06  |
| 6  | 6 | 0.26  | -0.01 | 0.01  | 0.00  | 0.02  | 0.03  | 0.00  | -0.01 | -0.01 |
| 7  | 6 | 0.04  | -0.09 | 0.00  | -0.12 | -0.06 | 0.02  | 0.04  | 0.02  | -0.01 |
| 8  | 1 | -0.05 | -0.03 | -0.03 | -0.15 | -0.04 | -0.17 | 0.05  | 0.01  | 0.06  |
| 9  | 6 | -0.08 | 0.12  | -0.02 | 0.04  | -0.02 | -0.06 | -0.01 | 0.01  | 0.02  |
| 10 | 8 | -0.12 | -0.07 | -0.02 | 0.03  | 0.00  | 0.03  | -0.01 | 0.00  | -0.01 |
| 11 | 6 | -0.16 | 0.02  | 0.02  | 0.01  | 0.33  | -0.04 | 0.00  | -0.10 | 0.01  |
| 12 | 8 | 0.05  | -0.03 | -0.17 | 0.00  | -0.06 | 0.02  | 0.00  | 0.02  | -0.01 |
| 13 | 8 | 0.06  | 0.02  | 0.17  | -0.01 | -0.07 | 0.01  | 0.00  | 0.03  | 0.00  |
| 14 | 6 | -0.09 | -0.11 | 0.03  | -0.04 | -0.01 | -0.07 | 0.01  | 0.00  | 0.02  |
| 15 | 8 | -0.12 | 0.08  | 0.02  | -0.03 | 0.01  | 0.03  | 0.01  | 0.00  | -0.01 |
| 16 | 8 | 0.10  | -0.07 | -0.02 | 0.02  | -0.01 | 0.02  | -0.01 | 0.00  | 0.00  |
| 17 | 1 | 0.39  | -0.28 | -0.06 | 0.08  | -0.06 | -0.07 | -0.03 | 0.02  | 0.02  |
| 18 | 7 | 0.01  | 0.00  | 0.00  | 0.00  | 0.04  | -0.01 | 0.00  | 0.02  | 0.00  |
| 19 | 1 | 0.05  | -0.06 | -0.37 | 0.00  | -0.21 | 0.04  | 0.00  | 0.07  | -0.01 |
| 20 | 7 | 0.00  | 0.00  | 0.01  | 0.00  | 0.02  | 0.00  | 0.00  | 0.04  | 0.00  |
| 21 | 1 | -0.01 | 0.00  | 0.03  | 0.00  | -0.26 | 0.03  | 0.00  | -0.12 | 0.02  |
| 22 | 6 | -0.01 | 0.00  | 0.00  | 0.00  | -0.03 | 0.00  | 0.00  | -0.07 | 0.01  |
| 23 | 1 | -0.01 | 0.00  | 0.00  | 0.00  | 0.30  | -0.04 | -0.01 | 0.45  | -0.06 |
| 24 | 6 | -0.01 | 0.00  | 0.00  | 0.00  | -0.06 | 0.01  | 0.00  | -0.08 | 0.01  |
| 25 | 1 | -0.01 | 0.00  | -0.01 | -0.01 | 0.56  | -0.07 | -0.01 | 0.81  | -0.10 |
| 26 | 6 | 0.00  | 0.00  | 0.01  | 0.00  | -0.04 | 0.00  | 0.00  | -0.03 | 0.00  |
| 27 | 1 | 0.00  | 0.00  | 0.01  | 0.00  | 0.14  | -0.02 | 0.00  | 0.24  | -0.03 |
| 28 | 8 | 0.10  | 0.06  | 0.03  | -0.03 | -0.01 | 0.01  | 0.01  | 0.00  | 0.00  |
| 29 | 1 | 0.26  | 0.00  | -0.01 | 0.00  | 0.24  | -0.25 | 0.00  | -0.07 | 0.08  |
| 30 | 1 | 0.39  | 0.26  | 0.09  | -0.09 | -0.06 | -0.07 | 0.03  | 0.02  | 0.02  |

34

35

36

A

A

A

|                |          |          |          |
|----------------|----------|----------|----------|
| Frequencies -- | 789.5997 | 804.7294 | 825.3019 |
| Red. masses -- | 1.7758   | 7.5816   | 1.1813   |
| Frc consts --  | 0.6523   | 2.8927   | 0.4741   |
| IR Inten --    | 47.2697  | 2.4221   | 64.8777  |
| Raman Activ -- | 0.3418   | 0.1789   | 0.1976   |
| Depolar (P) -- | 0.7483   | 0.5356   | 0.7090   |
| Depolar (U) -- | 0.8561   | 0.6976   | 0.8297   |

| Atom | AN | X     | Y     | Z     | X     | Y     | Z     | X     | Y     | Z     |
|------|----|-------|-------|-------|-------|-------|-------|-------|-------|-------|
| 1    | 6  | -0.01 | 0.00  | -0.05 | 0.00  | -0.01 | -0.24 | 0.00  | 0.00  | 0.00  |
| 2    | 6  | 0.00  | 0.01  | 0.19  | 0.00  | 0.00  | 0.02  | 0.00  | 0.01  | 0.00  |
| 3    | 6  | 0.01  | 0.00  | -0.05 | 0.00  | 0.01  | 0.23  | 0.00  | 0.00  | 0.00  |
| 4    | 6  | 0.02  | -0.01 | -0.03 | 0.00  | 0.01  | 0.03  | 0.01  | -0.01 | 0.00  |
| 5    | 1  | 0.03  | 0.00  | 0.51  | -0.02 | -0.01 | -0.35 | 0.01  | -0.01 | 0.00  |
| 6    | 6  | 0.00  | 0.00  | -0.11 | 0.04  | 0.00  | -0.01 | 0.00  | 0.00  | 0.00  |
| 7    | 6  | -0.02 | -0.01 | -0.03 | 0.01  | -0.01 | -0.03 | -0.01 | 0.00  | 0.00  |
| 8    | 1  | -0.03 | 0.00  | 0.49  | 0.00  | 0.01  | 0.40  | 0.00  | 0.00  | 0.01  |
| 9    | 6  | 0.00  | 0.00  | 0.02  | -0.09 | -0.01 | 0.45  | 0.00  | 0.00  | 0.01  |
| 10   | 8  | 0.01  | 0.00  | 0.00  | 0.02  | 0.00  | -0.13 | 0.00  | 0.00  | 0.00  |
| 11   | 6  | 0.01  | 0.08  | -0.04 | 0.00  | 0.00  | 0.00  | 0.00  | 0.02  | 0.00  |
| 12   | 8  | -0.03 | -0.02 | -0.02 | 0.00  | 0.00  | 0.00  | 0.00  | 0.00  | 0.00  |
| 13   | 8  | 0.03  | -0.02 | -0.01 | 0.00  | 0.00  | 0.00  | 0.00  | -0.02 | 0.00  |
| 14   | 6  | 0.00  | 0.00  | 0.03  | -0.07 | 0.01  | -0.44 | 0.00  | 0.00  | -0.01 |
| 15   | 8  | -0.01 | 0.00  | -0.01 | 0.01  | 0.00  | 0.12  | 0.00  | 0.00  | 0.00  |
| 16   | 8  | 0.00  | 0.00  | -0.01 | 0.02  | -0.01 | 0.11  | 0.00  | 0.00  | 0.00  |
| 17   | 1  | 0.02  | -0.01 | 0.00  | -0.02 | 0.00  | -0.25 | 0.00  | 0.00  | -0.01 |
| 18   | 7  | 0.00  | 0.00  | 0.00  | 0.00  | 0.00  | 0.00  | 0.00  | -0.03 | 0.00  |
| 19   | 1  | -0.04 | -0.05 | 0.03  | 0.00  | 0.02  | -0.01 | 0.00  | -0.10 | 0.01  |
| 20   | 7  | 0.00  | 0.00  | 0.00  | 0.00  | 0.00  | 0.00  | 0.00  | -0.03 | 0.00  |
| 21   | 1  | 0.01  | -0.05 | 0.00  | 0.00  | -0.08 | 0.01  | -0.01 | 0.90  | -0.12 |
| 22   | 6  | 0.00  | 0.00  | 0.00  | 0.00  | 0.01  | 0.00  | 0.00  | -0.10 | 0.01  |
| 23   | 1  | 0.00  | -0.02 | 0.00  | 0.00  | -0.03 | 0.00  | 0.00  | 0.36  | -0.05 |

|    |   |       |       |       |       |       |       |       |       |       |
|----|---|-------|-------|-------|-------|-------|-------|-------|-------|-------|
| 24 | 6 | 0.00  | 0.00  | 0.00  | 0.00  | 0.00  | 0.00  | 0.00  | 0.03  | 0.00  |
| 25 | 1 | 0.00  | -0.01 | 0.00  | 0.00  | -0.01 | 0.00  | 0.00  | 0.02  | 0.00  |
| 26 | 6 | 0.00  | 0.00  | 0.00  | 0.00  | 0.00  | 0.00  | 0.00  | 0.05  | -0.01 |
| 27 | 1 | 0.00  | -0.01 | 0.00  | 0.00  | 0.01  | 0.00  | 0.00  | -0.13 | 0.02  |
| 28 | 8 | 0.00  | 0.00  | 0.00  | 0.03  | 0.02  | -0.11 | 0.00  | 0.00  | 0.00  |
| 29 | 1 | 0.01  | 0.05  | 0.65  | 0.04  | -0.01 | 0.03  | 0.00  | 0.02  | 0.01  |
| 30 | 1 | -0.01 | -0.01 | -0.01 | -0.03 | 0.01  | 0.26  | -0.01 | -0.01 | 0.01  |

37

A

38

A

39

A

|                |          |          |          |
|----------------|----------|----------|----------|
| Frequencies -- | 832.0654 | 863.0575 | 886.9482 |
| Red. masses -- | 6.0185   | 3.7533   | 1.1754   |
| Frc consts --  | 2.4550   | 1.6472   | 0.5448   |
| IR Inten --    | 10.0322  | 0.4857   | 18.4837  |
| Raman Activ -- | 4.9925   | 0.4649   | 0.3703   |
| Depolar (P) -- | 0.0576   | 0.7499   | 0.7380   |
| Depolar (U) -- | 0.1088   | 0.8571   | 0.8493   |

| Atom | AN | X     | Y     | Z     | X     | Y     | Z     | X     | Y     | Z     |
|------|----|-------|-------|-------|-------|-------|-------|-------|-------|-------|
| 1    | 6  | -0.10 | -0.08 | 0.00  | 0.00  | 0.01  | 0.22  | 0.00  | -0.01 | 0.00  |
| 2    | 6  | -0.06 | 0.00  | 0.00  | 0.00  | 0.00  | -0.20 | 0.00  | -0.01 | 0.00  |
| 3    | 6  | -0.09 | 0.09  | -0.01 | 0.00  | 0.01  | 0.22  | 0.00  | -0.01 | 0.00  |
| 4    | 6  | -0.09 | 0.23  | 0.00  | 0.00  | 0.00  | -0.11 | 0.00  | 0.00  | 0.00  |
| 5    | 1  | -0.32 | 0.11  | -0.01 | 0.00  | 0.00  | 0.29  | 0.00  | 0.01  | 0.00  |
| 6    | 6  | 0.25  | -0.01 | 0.00  | 0.00  | 0.00  | -0.05 | 0.00  | 0.00  | 0.00  |
| 7    | 6  | -0.11 | -0.22 | 0.00  | 0.00  | 0.00  | -0.10 | 0.00  | 0.00  | 0.00  |
| 8    | 1  | -0.34 | -0.08 | 0.00  | -0.01 | 0.00  | 0.28  | 0.00  | 0.01  | 0.00  |
| 9    | 6  | -0.02 | 0.03  | -0.01 | 0.03  | 0.01  | -0.18 | 0.00  | 0.00  | 0.00  |
| 10   | 8  | -0.03 | -0.02 | 0.00  | -0.01 | 0.00  | 0.05  | 0.00  | 0.00  | 0.00  |
| 11   | 6  | 0.25  | -0.01 | -0.04 | 0.00  | -0.03 | 0.02  | 0.00  | 0.00  | 0.00  |
| 12   | 8  | 0.01  | 0.03  | 0.24  | 0.03  | 0.01  | 0.02  | 0.00  | 0.00  | 0.00  |
| 13   | 8  | 0.00  | -0.03 | -0.24 | -0.03 | 0.01  | 0.01  | 0.00  | 0.01  | 0.00  |
| 14   | 6  | -0.02 | -0.03 | 0.02  | -0.03 | 0.01  | -0.19 | 0.00  | 0.00  | 0.00  |
| 15   | 8  | -0.03 | 0.02  | 0.00  | 0.01  | 0.00  | 0.05  | 0.00  | 0.00  | 0.00  |
| 16   | 8  | 0.02  | -0.04 | -0.01 | 0.01  | -0.01 | 0.04  | 0.00  | 0.00  | 0.00  |
| 17   | 1  | 0.06  | -0.08 | -0.01 | -0.01 | -0.01 | -0.06 | -0.01 | 0.01  | 0.00  |
| 18   | 7  | -0.01 | 0.00  | 0.00  | 0.00  | 0.00  | 0.00  | 0.00  | 0.01  | 0.00  |
| 19   | 1  | 0.03  | 0.08  | 0.51  | 0.03  | 0.02  | -0.02 | 0.00  | 0.02  | 0.00  |
| 20   | 7  | 0.00  | 0.00  | -0.01 | 0.00  | 0.00  | 0.00  | 0.00  | 0.02  | 0.00  |
| 21   | 1  | 0.01  | 0.04  | -0.04 | -0.01 | -0.01 | 0.00  | 0.00  | -0.47 | 0.06  |
| 22   | 6  | 0.01  | 0.00  | 0.00  | 0.00  | 0.00  | 0.00  | 0.00  | -0.09 | 0.01  |
| 23   | 1  | 0.01  | 0.02  | 0.00  | 0.00  | -0.02 | 0.00  | 0.00  | 0.65  | -0.08 |
| 24   | 6  | 0.01  | 0.00  | 0.00  | 0.00  | 0.00  | 0.00  | 0.00  | 0.04  | -0.01 |
| 25   | 1  | 0.01  | 0.00  | 0.02  | 0.00  | 0.01  | 0.00  | 0.00  | -0.33 | 0.04  |
| 26   | 6  | -0.01 | 0.00  | -0.01 | 0.00  | 0.00  | 0.00  | 0.00  | 0.06  | -0.01 |
| 27   | 1  | -0.01 | -0.01 | -0.01 | 0.00  | 0.01  | 0.00  | 0.00  | -0.47 | 0.06  |
| 28   | 8  | 0.03  | 0.04  | 0.01  | -0.01 | -0.01 | 0.04  | 0.00  | 0.00  | 0.00  |
| 29   | 1  | 0.25  | -0.01 | -0.02 | 0.00  | 0.01  | 0.76  | 0.00  | -0.01 | 0.00  |
| 30   | 1  | 0.07  | 0.07  | 0.02  | 0.01  | 0.00  | -0.06 | 0.01  | 0.01  | 0.00  |

40

A

41

A

42

A

|                |          |          |          |
|----------------|----------|----------|----------|
| Frequencies -- | 902.7842 | 918.2416 | 941.1231 |
| Red. masses -- | 6.3392   | 1.3441   | 6.3637   |
| Frc consts --  | 3.0440   | 0.6677   | 3.3209   |
| IR Inten --    | 4.9920   | 8.8771   | 3.1181   |
| Raman Activ -- | 5.3333   | 0.1183   | 5.4465   |
| Depolar (P) -- | 0.7474   | 0.7402   | 0.7431   |
| Depolar (U) -- | 0.8554   | 0.8507   | 0.8526   |

| Atom | AN | X     | Y    | Z     | X    | Y    | Z    | X    | Y    | Z    |
|------|----|-------|------|-------|------|------|------|------|------|------|
| 1    | 6  | -0.05 | 0.25 | -0.02 | 0.00 | 0.00 | 0.00 | 0.00 | 0.00 | 0.00 |
| 2    | 6  | 0.01  | 0.29 | 0.01  | 0.00 | 0.00 | 0.00 | 0.00 | 0.00 | 0.00 |
| 3    | 6  | 0.06  | 0.25 | -0.02 | 0.00 | 0.00 | 0.00 | 0.00 | 0.00 | 0.00 |

|    |   |       |       |       |      |       |       |       |       |       |
|----|---|-------|-------|-------|------|-------|-------|-------|-------|-------|
| 4  | 6 | 0.11  | -0.08 | 0.01  | 0.00 | 0.00  | 0.00  | 0.00  | 0.00  | 0.00  |
| 5  | 1 | -0.05 | -0.16 | -0.01 | 0.00 | 0.00  | 0.00  | 0.00  | 0.00  | 0.00  |
| 6  | 6 | 0.00  | -0.02 | 0.00  | 0.00 | 0.00  | 0.00  | 0.00  | 0.00  | 0.00  |
| 7  | 6 | -0.12 | -0.08 | 0.01  | 0.00 | 0.00  | 0.00  | 0.00  | 0.00  | 0.00  |
| 8  | 1 | 0.04  | -0.18 | -0.01 | 0.00 | 0.00  | 0.00  | 0.00  | 0.00  | 0.00  |
| 9  | 6 | 0.08  | -0.04 | 0.04  | 0.00 | 0.00  | 0.00  | 0.00  | 0.00  | 0.00  |
| 10 | 8 | 0.13  | 0.01  | 0.02  | 0.00 | 0.00  | 0.00  | 0.00  | 0.00  | 0.00  |
| 11 | 6 | 0.00  | -0.24 | 0.03  | 0.00 | -0.01 | 0.00  | 0.00  | 0.00  | 0.01  |
| 12 | 8 | -0.01 | 0.03  | -0.01 | 0.00 | 0.00  | 0.00  | 0.01  | 0.00  | -0.02 |
| 13 | 8 | 0.01  | 0.05  | -0.01 | 0.00 | 0.00  | 0.00  | 0.00  | 0.00  | 0.01  |
| 14 | 6 | -0.09 | -0.03 | 0.03  | 0.00 | 0.00  | 0.00  | 0.00  | 0.00  | 0.00  |
| 15 | 8 | -0.12 | 0.02  | 0.01  | 0.00 | 0.00  | 0.00  | 0.00  | 0.00  | 0.00  |
| 16 | 8 | 0.10  | -0.16 | -0.03 | 0.00 | 0.00  | 0.00  | 0.00  | 0.00  | 0.00  |
| 17 | 1 | 0.27  | -0.29 | -0.05 | 0.00 | 0.00  | 0.00  | 0.00  | 0.00  | 0.00  |
| 18 | 7 | 0.00  | 0.00  | 0.00  | 0.00 | -0.01 | 0.00  | -0.16 | -0.01 | -0.04 |
| 19 | 1 | -0.01 | 0.16  | -0.02 | 0.00 | -0.06 | 0.01  | 0.01  | 0.00  | 0.01  |
| 20 | 7 | 0.00  | 0.01  | 0.00  | 0.00 | -0.01 | 0.00  | -0.18 | 0.00  | 0.01  |
| 21 | 1 | 0.00  | -0.10 | 0.01  | 0.00 | 0.01  | 0.00  | -0.04 | -0.04 | -0.22 |
| 22 | 6 | 0.00  | -0.01 | 0.00  | 0.00 | 0.05  | -0.01 | -0.06 | 0.04  | 0.36  |
| 23 | 1 | 0.00  | 0.09  | -0.01 | 0.00 | -0.33 | 0.04  | -0.26 | 0.05  | 0.31  |
| 24 | 6 | 0.00  | 0.01  | 0.00  | 0.00 | -0.10 | 0.01  | 0.42  | 0.01  | 0.03  |
| 25 | 1 | 0.00  | -0.06 | 0.01  | 0.00 | 0.43  | -0.05 | 0.44  | -0.01 | -0.02 |
| 26 | 6 | 0.00  | 0.00  | 0.00  | 0.00 | 0.13  | -0.02 | 0.01  | -0.05 | -0.32 |
| 27 | 1 | 0.00  | -0.02 | 0.00  | 0.01 | -0.81 | 0.10  | -0.12 | -0.02 | -0.32 |
| 28 | 8 | -0.11 | -0.16 | -0.03 | 0.00 | 0.00  | 0.00  | 0.00  | 0.00  | 0.00  |
| 29 | 1 | 0.01  | 0.34  | -0.02 | 0.00 | 0.00  | 0.00  | 0.00  | 0.00  | 0.00  |
| 30 | 1 | -0.29 | -0.27 | -0.07 | 0.00 | 0.00  | 0.00  | 0.00  | 0.00  | 0.00  |

43

44

45

A

A

A

|                |          |          |           |
|----------------|----------|----------|-----------|
| Frequencies -- | 956.6282 | 981.5591 | 1008.6459 |
| Red. masses -- | 3.1237   | 1.4044   | 1.0998    |
| Frc consts --  | 1.6843   | 0.7972   | 0.6592    |
| IR Inten --    | 40.3462  | 0.0173   | 103.4630  |
| Raman Activ -- | 3.1298   | 0.0111   | 0.2430    |
| Depolar (P) -- | 0.3394   | 0.7467   | 0.7203    |
| Depolar (U) -- | 0.5068   | 0.8550   | 0.8374    |

| Atom | AN | X     | Y     | Z     | X     | Y     | Z     | X     | Y     | Z     |
|------|----|-------|-------|-------|-------|-------|-------|-------|-------|-------|
| 1    | 6  | 0.00  | 0.00  | 0.00  | 0.00  | 0.00  | -0.04 | 0.00  | 0.00  | 0.00  |
| 2    | 6  | 0.00  | 0.00  | -0.01 | 0.00  | 0.00  | 0.00  | 0.00  | 0.00  | 0.00  |
| 3    | 6  | 0.00  | 0.00  | 0.00  | 0.00  | 0.00  | 0.04  | 0.00  | 0.00  | 0.00  |
| 4    | 6  | 0.00  | 0.00  | 0.00  | 0.00  | 0.00  | -0.13 | 0.00  | 0.00  | 0.00  |
| 5    | 1  | 0.00  | 0.00  | 0.00  | 0.01  | 0.01  | 0.71  | 0.00  | 0.00  | 0.00  |
| 6    | 6  | 0.00  | 0.00  | 0.00  | 0.00  | 0.00  | 0.01  | 0.00  | 0.00  | 0.00  |
| 7    | 6  | 0.00  | 0.00  | 0.00  | 0.00  | 0.00  | 0.12  | 0.00  | 0.00  | 0.00  |
| 8    | 1  | 0.00  | 0.00  | 0.00  | 0.01  | -0.02 | -0.67 | 0.00  | 0.00  | 0.01  |
| 9    | 6  | 0.00  | 0.00  | 0.00  | -0.01 | 0.00  | 0.03  | 0.00  | 0.00  | 0.00  |
| 10   | 8  | 0.00  | 0.00  | 0.00  | 0.00  | 0.00  | -0.01 | 0.00  | 0.00  | 0.00  |
| 11   | 6  | 0.00  | 0.00  | 0.00  | 0.00  | 0.00  | 0.00  | 0.00  | 0.04  | -0.01 |
| 12   | 8  | 0.02  | 0.00  | -0.01 | 0.00  | 0.00  | 0.00  | 0.00  | -0.06 | 0.01  |
| 13   | 8  | -0.01 | 0.00  | 0.01  | 0.00  | 0.00  | 0.00  | 0.00  | -0.02 | 0.00  |
| 14   | 6  | 0.00  | 0.00  | 0.00  | 0.00  | 0.00  | -0.03 | 0.00  | 0.00  | 0.00  |
| 15   | 8  | 0.00  | 0.00  | 0.00  | 0.00  | 0.00  | 0.01  | 0.00  | 0.00  | 0.00  |
| 16   | 8  | 0.00  | 0.00  | 0.00  | 0.00  | 0.00  | 0.00  | 0.00  | 0.00  | 0.00  |
| 17   | 1  | 0.00  | 0.00  | 0.00  | -0.01 | 0.00  | -0.01 | -0.01 | 0.01  | 0.00  |
| 18   | 7  | -0.20 | 0.02  | 0.14  | 0.00  | 0.00  | 0.00  | 0.00  | -0.03 | 0.00  |
| 19   | 1  | 0.00  | -0.02 | -0.02 | 0.00  | 0.01  | 0.00  | 0.01  | 0.98  | -0.13 |
| 20   | 7  | 0.16  | 0.02  | 0.16  | 0.00  | 0.00  | 0.00  | 0.00  | 0.00  | 0.00  |
| 21   | 1  | 0.33  | -0.01 | -0.05 | 0.00  | 0.00  | 0.00  | 0.00  | 0.07  | -0.01 |
| 22   | 6  | 0.10  | -0.02 | -0.12 | 0.00  | 0.00  | 0.00  | 0.00  | 0.00  | 0.00  |
| 23   | 1  | -0.43 | -0.03 | -0.27 | 0.00  | 0.00  | 0.00  | 0.00  | 0.01  | 0.00  |



|    |   |       |       |       |       |      |       |      |       |      |
|----|---|-------|-------|-------|-------|------|-------|------|-------|------|
| 24 | 6 | 0.01  | -0.01 | -0.07 | 0.00  | 0.00 | 0.00  | 0.00 | 0.00  | 0.00 |
| 25 | 1 | -0.03 | 0.06  | 0.58  | 0.00  | 0.00 | 0.00  | 0.00 | 0.03  | 0.00 |
| 26 | 6 | -0.11 | -0.02 | -0.15 | 0.00  | 0.00 | 0.00  | 0.00 | 0.01  | 0.00 |
| 27 | 1 | 0.27  | -0.03 | -0.21 | 0.00  | 0.00 | 0.00  | 0.00 | -0.04 | 0.00 |
| 28 | 8 | 0.00  | 0.00  | 0.00  | 0.00  | 0.00 | 0.00  | 0.00 | 0.00  | 0.00 |
| 29 | 1 | 0.00  | 0.00  | 0.00  | 0.00  | 0.00 | -0.05 | 0.00 | 0.00  | 0.00 |
| 30 | 1 | 0.00  | 0.00  | 0.00  | -0.01 | 0.00 | 0.00  | 0.01 | 0.01  | 0.00 |

46

A

47

A

48

A

|                |           |           |           |
|----------------|-----------|-----------|-----------|
| Frequencies -- | 1022.4054 | 1068.0212 | 1079.5025 |
| Red. masses -- | 1.3594    | 1.3951    | 1.5005    |
| Frc consts --  | 0.8372    | 0.9376    | 1.0303    |
| IR Inten --    | 0.8597    | 14.1728   | 89.9351   |
| Raman Activ -- | 0.0266    | 2.9769    | 1.7822    |
| Depolar (P) -- | 0.4602    | 0.5927    | 0.7480    |
| Depolar (U) -- | 0.6303    | 0.7443    | 0.8558    |

| Atom | AN | X     | Y     | Z     | X     | Y     | Z     | X     | Y     | Z     |
|------|----|-------|-------|-------|-------|-------|-------|-------|-------|-------|
| 1    | 6  | 0.00  | 0.00  | 0.01  | 0.00  | 0.00  | 0.00  | 0.00  | 0.00  | 0.00  |
| 2    | 6  | 0.00  | 0.00  | 0.02  | 0.00  | 0.00  | 0.00  | 0.01  | 0.00  | 0.00  |
| 3    | 6  | 0.00  | 0.00  | 0.01  | 0.00  | 0.00  | 0.00  | 0.00  | 0.00  | 0.00  |
| 4    | 6  | 0.00  | 0.00  | -0.08 | 0.00  | 0.00  | 0.00  | 0.00  | 0.01  | 0.00  |
| 5    | 1  | 0.01  | 0.00  | 0.47  | 0.00  | -0.01 | 0.00  | 0.01  | 0.01  | 0.00  |
| 6    | 6  | 0.00  | 0.00  | 0.12  | 0.00  | 0.00  | 0.00  | 0.00  | 0.00  | 0.00  |
| 7    | 6  | 0.00  | 0.00  | -0.09 | 0.00  | 0.00  | 0.00  | 0.00  | -0.01 | 0.00  |
| 8    | 1  | -0.01 | 0.02  | 0.55  | 0.00  | 0.01  | 0.00  | 0.01  | -0.02 | 0.00  |
| 9    | 6  | 0.00  | 0.00  | -0.01 | 0.00  | 0.00  | 0.00  | 0.00  | 0.00  | 0.00  |
| 10   | 8  | 0.00  | 0.00  | 0.00  | 0.00  | 0.00  | 0.00  | 0.00  | 0.00  | 0.00  |
| 11   | 6  | 0.00  | 0.00  | 0.00  | 0.00  | 0.00  | 0.00  | 0.00  | 0.00  | 0.00  |
| 12   | 8  | 0.00  | 0.00  | 0.00  | 0.00  | 0.00  | 0.00  | 0.00  | 0.00  | -0.01 |
| 13   | 8  | 0.00  | 0.00  | 0.00  | 0.00  | 0.00  | 0.00  | 0.00  | 0.00  | 0.01  |
| 14   | 6  | 0.00  | 0.00  | -0.01 | 0.00  | 0.00  | 0.00  | 0.00  | 0.00  | 0.00  |
| 15   | 8  | 0.00  | 0.00  | 0.00  | 0.00  | 0.00  | 0.00  | 0.00  | 0.00  | 0.00  |
| 16   | 8  | 0.00  | 0.00  | 0.00  | 0.00  | 0.00  | 0.00  | 0.00  | 0.00  | 0.00  |
| 17   | 1  | 0.00  | 0.00  | -0.01 | 0.00  | 0.00  | 0.00  | 0.01  | 0.00  | 0.00  |
| 18   | 7  | 0.00  | 0.00  | 0.00  | 0.06  | 0.00  | 0.00  | -0.09 | 0.01  | 0.12  |
| 19   | 1  | 0.00  | -0.01 | 0.00  | 0.01  | 0.00  | 0.03  | 0.00  | 0.01  | 0.01  |
| 20   | 7  | 0.00  | 0.00  | 0.00  | -0.08 | -0.01 | -0.05 | -0.02 | -0.01 | -0.05 |
| 21   | 1  | 0.00  | 0.00  | 0.00  | -0.20 | 0.01  | 0.09  | 0.01  | -0.01 | -0.10 |
| 22   | 6  | 0.00  | 0.00  | 0.00  | -0.01 | 0.00  | -0.02 | 0.07  | 0.01  | 0.04  |
| 23   | 1  | 0.00  | 0.00  | 0.00  | 0.14  | 0.00  | 0.02  | 0.78  | 0.03  | 0.23  |
| 24   | 6  | 0.00  | 0.00  | 0.00  | -0.05 | 0.01  | 0.08  | -0.06 | -0.01 | -0.06 |
| 25   | 1  | 0.00  | 0.00  | 0.00  | -0.10 | 0.10  | 0.83  | -0.04 | -0.04 | -0.33 |
| 26   | 6  | 0.00  | 0.00  | 0.00  | 0.07  | -0.01 | -0.07 | 0.00  | 0.00  | -0.04 |
| 27   | 1  | 0.00  | 0.00  | 0.00  | 0.41  | -0.01 | -0.13 | 0.41  | -0.01 | -0.10 |
| 28   | 8  | 0.00  | 0.00  | 0.00  | 0.00  | 0.00  | 0.00  | 0.00  | 0.00  | 0.00  |
| 29   | 1  | 0.00  | -0.01 | -0.67 | 0.00  | 0.00  | 0.00  | 0.00  | 0.00  | 0.00  |
| 30   | 1  | 0.01  | 0.00  | 0.00  | 0.00  | 0.00  | 0.00  | 0.00  | 0.00  | 0.00  |

49

A

50

A

51

A

|                |           |           |           |
|----------------|-----------|-----------|-----------|
| Frequencies -- | 1099.9775 | 1147.6967 | 1178.6511 |
| Red. masses -- | 3.6664    | 5.4318    | 2.1339    |
| Frc consts --  | 2.6137    | 4.2155    | 1.7466    |
| IR Inten --    | 36.2416   | 45.9180   | 100.7700  |
| Raman Activ -- | 25.1438   | 7.0272    | 18.2634   |
| Depolar (P) -- | 0.0827    | 0.0528    | 0.1640    |
| Depolar (U) -- | 0.1527    | 0.1004    | 0.2818    |

| Atom | AN | X    | Y     | Z     | X     | Y     | Z     | X    | Y     | Z     |
|------|----|------|-------|-------|-------|-------|-------|------|-------|-------|
| 1    | 6  | 0.04 | 0.10  | 0.00  | -0.11 | 0.21  | -0.01 | 0.01 | 0.00  | 0.00  |
| 2    | 6  | 0.19 | -0.01 | -0.01 | 0.00  | 0.00  | 0.00  | 0.16 | -0.02 | -0.01 |
| 3    | 6  | 0.03 | -0.10 | 0.00  | -0.13 | -0.20 | 0.01  | 0.02 | 0.01  | 0.00  |

|    |   |       |       |       |       |       |       |       |       |       |
|----|---|-------|-------|-------|-------|-------|-------|-------|-------|-------|
| 4  | 6 | -0.05 | 0.25  | 0.00  | -0.05 | -0.12 | 0.00  | -0.05 | 0.02  | 0.00  |
| 5  | 1 | 0.32  | 0.46  | -0.01 | -0.30 | -0.27 | 0.02  | -0.22 | -0.06 | 0.00  |
| 6  | 6 | -0.07 | 0.01  | 0.00  | 0.23  | -0.02 | 0.00  | 0.04  | -0.03 | 0.00  |
| 7  | 6 | -0.07 | -0.24 | 0.00  | -0.05 | 0.12  | 0.00  | -0.07 | 0.01  | 0.00  |
| 8  | 1 | 0.37  | -0.53 | 0.02  | -0.40 | 0.36  | -0.03 | -0.48 | 0.26  | -0.02 |
| 9  | 6 | 0.02  | 0.07  | 0.01  | 0.08  | 0.17  | 0.02  | 0.00  | 0.00  | 0.00  |
| 10 | 8 | 0.02  | 0.00  | 0.00  | 0.11  | -0.03 | 0.02  | 0.01  | 0.00  | 0.00  |
| 11 | 6 | 0.01  | 0.01  | 0.03  | 0.01  | 0.00  | 0.00  | 0.03  | 0.01  | 0.04  |
| 12 | 8 | -0.04 | -0.01 | -0.07 | -0.01 | 0.00  | -0.01 | -0.04 | -0.01 | -0.07 |
| 13 | 8 | -0.03 | 0.01  | 0.06  | 0.00  | 0.00  | 0.01  | -0.03 | 0.01  | 0.04  |
| 14 | 6 | 0.02  | -0.08 | -0.01 | 0.06  | -0.17 | -0.01 | -0.02 | 0.07  | 0.01  |
| 15 | 8 | 0.03  | 0.00  | 0.00  | 0.11  | 0.03  | -0.02 | -0.03 | -0.01 | 0.00  |
| 16 | 8 | -0.05 | 0.06  | 0.01  | -0.11 | 0.14  | 0.02  | 0.05  | -0.04 | -0.01 |
| 17 | 1 | 0.08  | -0.03 | -0.01 | 0.20  | -0.08 | -0.04 | -0.17 | 0.11  | 0.03  |
| 18 | 7 | 0.01  | 0.00  | -0.01 | 0.00  | 0.00  | -0.01 | 0.01  | 0.01  | 0.06  |
| 19 | 1 | -0.04 | -0.01 | -0.06 | 0.00  | 0.00  | 0.00  | -0.03 | 0.00  | 0.04  |
| 20 | 7 | 0.00  | 0.00  | 0.00  | 0.01  | 0.00  | -0.01 | -0.08 | 0.00  | 0.01  |
| 21 | 1 | 0.00  | 0.00  | 0.00  | 0.04  | -0.01 | -0.05 | -0.25 | 0.03  | 0.23  |
| 22 | 6 | -0.01 | 0.00  | 0.00  | -0.01 | 0.00  | 0.01  | 0.07  | -0.01 | -0.09 |
| 23 | 1 | -0.08 | 0.00  | -0.02 | -0.06 | 0.00  | 0.00  | 0.24  | 0.00  | -0.06 |
| 24 | 6 | 0.00  | 0.00  | 0.01  | -0.01 | 0.00  | 0.01  | 0.09  | 0.00  | -0.04 |
| 25 | 1 | 0.00  | 0.01  | 0.06  | -0.01 | 0.00  | 0.01  | 0.09  | 0.02  | 0.16  |
| 26 | 6 | 0.01  | 0.00  | 0.01  | 0.01  | 0.00  | 0.00  | -0.05 | 0.00  | 0.02  |
| 27 | 1 | -0.01 | 0.00  | 0.01  | 0.05  | 0.00  | 0.00  | -0.44 | 0.01  | 0.09  |
| 28 | 8 | -0.05 | -0.06 | -0.01 | -0.13 | -0.14 | -0.03 | 0.00  | 0.00  | 0.00  |
| 29 | 1 | -0.09 | 0.04  | 0.00  | 0.25  | -0.07 | 0.00  | 0.03  | -0.31 | 0.01  |
| 30 | 1 | 0.07  | 0.02  | 0.01  | 0.22  | 0.09  | 0.05  | 0.03  | 0.02  | 0.01  |

52

53

54

A

A

A

|                |           |           |           |
|----------------|-----------|-----------|-----------|
| Frequencies -- | 1179.6295 | 1183.7091 | 1208.0740 |
| Red. masses -- | 1.9485    | 2.0676    | 1.5214    |
| Frc consts --  | 1.5975    | 1.7069    | 1.3083    |
| IR Inten --    | 66.4296   | 315.2288  | 313.3065  |
| Raman Activ -- | 5.3436    | 0.8049    | 9.4591    |
| Depolar (P) -- | 0.1232    | 0.5641    | 0.7485    |
| Depolar (U) -- | 0.2194    | 0.7213    | 0.8562    |

| Atom | AN | X     | Y     | Z     | X     | Y     | Z     | X     | Y     | Z     |
|------|----|-------|-------|-------|-------|-------|-------|-------|-------|-------|
| 1    | 6  | 0.01  | -0.01 | 0.00  | 0.02  | -0.01 | 0.00  | -0.06 | 0.04  | 0.00  |
| 2    | 6  | 0.11  | -0.02 | 0.00  | 0.12  | 0.06  | -0.01 | -0.01 | 0.03  | 0.00  |
| 3    | 6  | 0.03  | 0.02  | 0.00  | -0.01 | -0.01 | 0.00  | 0.07  | 0.05  | 0.00  |
| 4    | 6  | -0.03 | 0.02  | 0.00  | -0.07 | -0.05 | 0.00  | 0.03  | 0.04  | 0.00  |
| 5    | 1  | -0.13 | -0.02 | 0.00  | -0.45 | -0.25 | 0.01  | 0.18  | 0.12  | 0.00  |
| 6    | 6  | 0.01  | -0.03 | 0.00  | 0.04  | 0.06  | 0.00  | -0.01 | -0.06 | 0.00  |
| 7    | 6  | -0.05 | 0.01  | 0.00  | -0.02 | -0.04 | 0.00  | -0.01 | 0.03  | 0.00  |
| 8    | 1  | -0.37 | 0.20  | -0.01 | -0.10 | 0.01  | 0.01  | -0.13 | 0.10  | 0.00  |
| 9    | 6  | 0.00  | 0.01  | 0.00  | -0.04 | -0.12 | -0.01 | -0.01 | -0.06 | -0.01 |
| 10   | 8  | 0.01  | 0.00  | 0.00  | -0.05 | 0.01  | -0.01 | -0.03 | 0.00  | 0.00  |
| 11   | 6  | 0.02  | 0.01  | 0.02  | 0.03  | -0.01 | 0.03  | 0.00  | 0.01  | 0.00  |
| 12   | 8  | -0.03 | -0.01 | -0.04 | -0.03 | 0.00  | -0.05 | 0.00  | 0.00  | 0.00  |
| 13   | 8  | -0.02 | 0.00  | 0.03  | -0.02 | 0.01  | 0.03  | 0.00  | 0.00  | 0.00  |
| 14   | 6  | -0.02 | 0.07  | 0.01  | 0.02  | -0.07 | 0.00  | 0.01  | -0.07 | -0.01 |
| 15   | 8  | -0.03 | -0.01 | 0.00  | 0.04  | 0.00  | -0.01 | 0.03  | 0.00  | 0.00  |
| 16   | 8  | 0.05  | -0.05 | -0.01 | -0.05 | 0.04  | 0.01  | -0.07 | 0.04  | 0.01  |
| 17   | 1  | -0.16 | 0.10  | 0.03  | 0.21  | -0.15 | -0.04 | 0.35  | -0.27 | -0.06 |
| 18   | 7  | -0.02 | -0.01 | -0.06 | 0.00  | 0.00  | 0.00  | 0.00  | 0.00  | 0.00  |
| 19   | 1  | -0.03 | -0.02 | -0.07 | -0.03 | 0.02  | -0.02 | 0.00  | 0.01  | 0.00  |
| 20   | 7  | 0.09  | 0.00  | -0.02 | 0.01  | 0.00  | -0.01 | 0.00  | 0.00  | 0.00  |
| 21   | 1  | 0.28  | -0.03 | -0.28 | 0.03  | 0.00  | -0.03 | 0.00  | 0.00  | 0.00  |
| 22   | 6  | -0.08 | 0.01  | 0.09  | -0.01 | 0.00  | 0.01  | 0.00  | 0.00  | 0.00  |
| 23   | 1  | -0.32 | 0.00  | 0.04  | -0.05 | 0.00  | 0.00  | 0.01  | 0.00  | 0.00  |

|    |   |       |       |       |       |       |       |       |       |       |
|----|---|-------|-------|-------|-------|-------|-------|-------|-------|-------|
| 24 | 6 | -0.09 | 0.01  | 0.05  | -0.01 | 0.00  | 0.01  | 0.00  | 0.00  | 0.00  |
| 25 | 1 | -0.09 | -0.03 | -0.19 | 0.00  | 0.00  | -0.02 | 0.00  | 0.00  | 0.00  |
| 26 | 6 | 0.06  | 0.00  | -0.01 | 0.01  | 0.00  | 0.01  | 0.00  | 0.00  | 0.00  |
| 27 | 1 | 0.53  | -0.01 | -0.09 | 0.06  | 0.00  | 0.00  | 0.00  | 0.00  | 0.00  |
| 28 | 8 | -0.01 | 0.00  | 0.00  | 0.10  | 0.07  | 0.02  | 0.07  | 0.03  | 0.01  |
| 29 | 1 | 0.00  | -0.30 | 0.01  | 0.06  | 0.63  | -0.01 | -0.03 | -0.72 | 0.00  |
| 30 | 1 | 0.05  | 0.04  | 0.01  | -0.34 | -0.21 | -0.08 | -0.33 | -0.22 | -0.07 |

55

A

56

A

57

A

|                |           |           |           |
|----------------|-----------|-----------|-----------|
| Frequencies -- | 1217.4363 | 1231.9354 | 1256.0451 |
| Red. masses -- | 3.6666    | 1.7996    | 1.7240    |
| Frc consts --  | 3.2019    | 1.6092    | 1.6025    |
| IR Inten --    | 41.5219   | 18.2754   | 0.7600    |
| Raman Activ -- | 38.9926   | 27.3819   | 1.8933    |
| Depolar (P) -- | 0.0607    | 0.1140    | 0.5802    |
| Depolar (U) -- | 0.1144    | 0.2047    | 0.7343    |

| Atom | AN | X     | Y     | Z     | X     | Y     | Z     | X     | Y     | Z     |
|------|----|-------|-------|-------|-------|-------|-------|-------|-------|-------|
| 1    | 6  | 0.00  | 0.02  | 0.00  | -0.10 | 0.13  | 0.00  | 0.13  | -0.01 | 0.00  |
| 2    | 6  | 0.03  | 0.00  | 0.00  | 0.00  | -0.01 | 0.00  | -0.01 | 0.11  | 0.00  |
| 3    | 6  | -0.01 | -0.02 | 0.00  | -0.07 | -0.11 | 0.00  | -0.14 | -0.03 | 0.00  |
| 4    | 6  | -0.01 | 0.00  | 0.00  | 0.00  | 0.00  | 0.00  | 0.04  | -0.04 | 0.00  |
| 5    | 1  | -0.03 | -0.01 | 0.00  | 0.17  | 0.08  | -0.01 | 0.67  | 0.28  | -0.01 |
| 6    | 6  | 0.01  | 0.00  | 0.00  | 0.08  | 0.00  | 0.00  | -0.01 | -0.02 | 0.00  |
| 7    | 6  | -0.01 | 0.00  | 0.00  | 0.00  | 0.02  | 0.00  | -0.03 | -0.05 | 0.00  |
| 8    | 1  | -0.03 | 0.01  | 0.00  | 0.28  | -0.14 | 0.02  | -0.54 | 0.25  | -0.01 |
| 9    | 6  | 0.00  | 0.00  | 0.00  | 0.00  | -0.03 | 0.00  | -0.02 | -0.05 | 0.00  |
| 10   | 8  | 0.00  | 0.00  | 0.00  | -0.03 | -0.01 | -0.01 | -0.02 | 0.01  | 0.00  |
| 11   | 6  | -0.01 | 0.00  | -0.01 | 0.00  | 0.00  | 0.00  | -0.01 | -0.04 | 0.00  |
| 12   | 8  | 0.00  | 0.00  | 0.00  | 0.00  | 0.00  | 0.01  | 0.00  | 0.00  | 0.00  |
| 13   | 8  | 0.00  | 0.00  | 0.00  | 0.00  | 0.00  | 0.00  | 0.00  | 0.00  | -0.01 |
| 14   | 6  | 0.00  | 0.01  | 0.00  | 0.00  | 0.03  | 0.00  | 0.02  | -0.05 | 0.00  |
| 15   | 8  | 0.00  | 0.00  | 0.00  | -0.03 | 0.01  | 0.00  | 0.02  | 0.02  | 0.00  |
| 16   | 8  | 0.01  | 0.00  | 0.00  | 0.08  | -0.02 | -0.01 | 0.00  | 0.02  | 0.00  |
| 17   | 1  | -0.05 | 0.04  | 0.01  | -0.47 | 0.38  | 0.09  | -0.14 | 0.12  | 0.03  |
| 18   | 7  | 0.13  | -0.02 | -0.16 | -0.01 | 0.00  | 0.01  | 0.00  | 0.00  | 0.00  |
| 19   | 1  | -0.02 | 0.00  | -0.01 | 0.00  | -0.01 | -0.01 | 0.00  | 0.03  | 0.00  |
| 20   | 7  | 0.06  | 0.04  | 0.27  | 0.00  | 0.00  | -0.01 | 0.00  | 0.00  | 0.00  |
| 21   | 1  | -0.02 | 0.06  | 0.44  | 0.00  | 0.00  | -0.02 | 0.00  | 0.00  | 0.00  |
| 22   | 6  | 0.01  | 0.01  | 0.11  | 0.00  | 0.00  | 0.00  | 0.00  | 0.00  | 0.00  |
| 23   | 1  | 0.54  | 0.04  | 0.28  | -0.03 | 0.00  | -0.01 | 0.00  | 0.00  | 0.00  |
| 24   | 6  | -0.17 | -0.01 | -0.05 | 0.01  | 0.00  | 0.00  | 0.00  | 0.00  | 0.00  |
| 25   | 1  | -0.20 | -0.01 | -0.03 | 0.01  | 0.00  | -0.01 | 0.00  | 0.00  | 0.00  |
| 26   | 6  | -0.06 | -0.03 | -0.22 | 0.00  | 0.00  | 0.01  | 0.00  | 0.00  | 0.00  |
| 27   | 1  | -0.34 | -0.03 | -0.21 | 0.03  | 0.00  | 0.01  | 0.00  | 0.00  | 0.00  |
| 28   | 8  | 0.01  | 0.00  | 0.00  | 0.08  | 0.01  | 0.02  | 0.01  | 0.02  | 0.00  |
| 29   | 1  | 0.02  | 0.01  | 0.00  | 0.08  | -0.06 | 0.00  | 0.00  | 0.11  | 0.00  |
| 30   | 1  | -0.04 | -0.03 | -0.01 | -0.52 | -0.37 | -0.12 | 0.04  | 0.04  | 0.01  |

58

A

59

A

60

A

|                |           |           |           |
|----------------|-----------|-----------|-----------|
| Frequencies -- | 1320.6289 | 1332.8494 | 1368.3502 |
| Red. masses -- | 1.6927    | 5.9039    | 3.8322    |
| Frc consts --  | 1.7394    | 6.1794    | 4.2276    |
| IR Inten --    | 34.3351   | 0.6540    | 271.9121  |
| Raman Activ -- | 31.6668   | 12.4888   | 5.6087    |
| Depolar (P) -- | 0.2042    | 0.7499    | 0.0687    |
| Depolar (U) -- | 0.3392    | 0.8571    | 0.1285    |

| Atom | AN | X    | Y    | Z    | X     | Y     | Z     | X     | Y     | Z     |
|------|----|------|------|------|-------|-------|-------|-------|-------|-------|
| 1    | 6  | 0.00 | 0.00 | 0.00 | -0.26 | -0.14 | 0.00  | -0.08 | -0.06 | 0.00  |
| 2    | 6  | 0.00 | 0.00 | 0.00 | 0.00  | 0.32  | -0.01 | -0.10 | 0.00  | -0.02 |
| 3    | 6  | 0.00 | 0.00 | 0.00 | 0.25  | -0.16 | 0.00  | -0.09 | 0.07  | 0.01  |

|    |   |       |       |       |       |       |       |       |       |       |
|----|---|-------|-------|-------|-------|-------|-------|-------|-------|-------|
| 4  | 6 | 0.00  | 0.00  | 0.00  | -0.19 | -0.10 | 0.00  | 0.05  | -0.05 | 0.00  |
| 5  | 1 | -0.01 | 0.00  | 0.00  | 0.18  | 0.08  | 0.00  | 0.30  | 0.08  | -0.01 |
| 6  | 6 | 0.00  | 0.00  | 0.00  | 0.00  | 0.23  | 0.00  | 0.02  | 0.00  | 0.00  |
| 7  | 6 | 0.00  | 0.00  | 0.00  | 0.19  | -0.12 | 0.00  | 0.03  | 0.05  | 0.00  |
| 8  | 1 | -0.01 | 0.00  | 0.00  | -0.15 | 0.08  | -0.01 | 0.33  | -0.12 | 0.00  |
| 9  | 6 | 0.00  | 0.00  | 0.00  | -0.01 | -0.05 | -0.01 | -0.01 | -0.02 | -0.01 |
| 10 | 8 | 0.00  | 0.00  | 0.00  | 0.05  | 0.00  | 0.01  | 0.02  | 0.00  | 0.00  |
| 11 | 6 | 0.00  | 0.00  | -0.01 | 0.00  | -0.04 | 0.01  | 0.31  | 0.01  | 0.16  |
| 12 | 8 | 0.00  | 0.00  | 0.00  | 0.00  | 0.00  | 0.00  | -0.09 | -0.03 | -0.21 |
| 13 | 8 | 0.00  | 0.00  | 0.01  | 0.00  | 0.01  | 0.00  | -0.07 | 0.01  | 0.07  |
| 14 | 6 | 0.00  | 0.00  | 0.00  | 0.01  | -0.05 | -0.01 | 0.00  | -0.02 | 0.00  |
| 15 | 8 | 0.00  | 0.00  | 0.00  | -0.05 | 0.00  | 0.01  | 0.01  | 0.00  | 0.00  |
| 16 | 8 | 0.00  | 0.00  | 0.00  | 0.04  | 0.03  | 0.00  | -0.01 | 0.00  | 0.00  |
| 17 | 1 | -0.02 | 0.01  | 0.00  | -0.31 | 0.28  | 0.06  | 0.02  | -0.02 | 0.00  |
| 18 | 7 | 0.08  | 0.02  | 0.13  | 0.00  | 0.00  | 0.00  | 0.02  | 0.00  | 0.00  |
| 19 | 1 | -0.01 | 0.00  | 0.01  | 0.00  | 0.05  | 0.00  | -0.01 | 0.09  | 0.70  |
| 20 | 7 | 0.05  | -0.01 | -0.07 | 0.00  | 0.00  | 0.00  | 0.02  | 0.00  | -0.01 |
| 21 | 1 | 0.38  | -0.06 | -0.52 | -0.01 | 0.01  | 0.01  | -0.03 | 0.01  | 0.06  |
| 22 | 6 | -0.11 | 0.00  | 0.05  | 0.00  | 0.00  | 0.00  | 0.01  | 0.00  | 0.01  |
| 23 | 1 | 0.09  | 0.01  | 0.11  | 0.00  | 0.00  | 0.00  | -0.10 | 0.00  | -0.02 |
| 24 | 6 | -0.05 | -0.01 | -0.06 | 0.00  | 0.00  | 0.00  | -0.03 | 0.00  | 0.02  |
| 25 | 1 | -0.09 | 0.04  | 0.30  | 0.00  | 0.00  | -0.01 | -0.03 | -0.01 | -0.10 |
| 26 | 6 | 0.03  | -0.01 | -0.06 | 0.00  | 0.00  | 0.00  | -0.01 | 0.00  | -0.03 |
| 27 | 1 | -0.64 | 0.00  | 0.04  | 0.01  | 0.00  | 0.00  | -0.05 | -0.01 | -0.03 |
| 28 | 8 | 0.00  | 0.00  | 0.00  | -0.04 | 0.03  | 0.00  | -0.01 | 0.01  | 0.00  |
| 29 | 1 | 0.00  | 0.00  | 0.00  | -0.02 | -0.40 | 0.00  | 0.03  | -0.04 | 0.00  |
| 30 | 1 | -0.01 | -0.01 | 0.00  | 0.30  | 0.24  | 0.07  | 0.09  | 0.08  | 0.02  |

61

62

63

A

A

A

|                |           |           |           |
|----------------|-----------|-----------|-----------|
| Frequencies -- | 1381.2525 | 1392.8422 | 1416.2379 |
| Red. masses -- | 2.5524    | 2.8170    | 2.9169    |
| Frc consts --  | 2.8691    | 3.2198    | 3.4470    |
| IR Inten --    | 231.0886  | 6.8511    | 76.1215   |
| Raman Activ -- | 1.1551    | 19.9617   | 9.8404    |
| Depolar (P) -- | 0.7500    | 0.1993    | 0.1513    |
| Depolar (U) -- | 0.8571    | 0.3324    | 0.2628    |

| Atom | AN | X     | Y     | Z     | X     | Y     | Z     | X     | Y     | Z     |
|------|----|-------|-------|-------|-------|-------|-------|-------|-------|-------|
| 1    | 6  | 0.00  | -0.07 | 0.00  | -0.09 | 0.07  | 0.00  | 0.02  | 0.02  | 0.00  |
| 2    | 6  | -0.02 | 0.01  | 0.00  | 0.07  | 0.01  | 0.00  | 0.01  | 0.00  | 0.00  |
| 3    | 6  | 0.00  | -0.06 | 0.00  | -0.10 | -0.08 | 0.00  | 0.02  | -0.02 | 0.00  |
| 4    | 6  | -0.07 | -0.04 | 0.00  | -0.03 | -0.03 | 0.00  | -0.01 | 0.01  | 0.00  |
| 5    | 1  | 0.25  | 0.13  | -0.01 | 0.30  | 0.14  | -0.01 | -0.06 | -0.02 | 0.00  |
| 6    | 6  | -0.01 | 0.05  | 0.00  | 0.08  | 0.01  | 0.00  | 0.00  | 0.00  | 0.00  |
| 7    | 6  | 0.08  | -0.05 | 0.00  | -0.02 | 0.02  | 0.00  | 0.00  | -0.01 | 0.00  |
| 8    | 1  | -0.24 | 0.15  | -0.01 | 0.22  | -0.12 | 0.01  | -0.06 | 0.02  | 0.00  |
| 9    | 6  | 0.05  | 0.23  | 0.02  | -0.04 | -0.19 | -0.02 | 0.00  | -0.01 | 0.00  |
| 10   | 8  | -0.05 | -0.03 | -0.01 | 0.05  | 0.02  | 0.01  | 0.00  | 0.00  | 0.00  |
| 11   | 6  | 0.02  | 0.00  | 0.01  | -0.03 | 0.00  | -0.01 | -0.06 | 0.00  | -0.04 |
| 12   | 8  | -0.01 | 0.00  | -0.01 | 0.01  | 0.00  | 0.02  | 0.02  | 0.00  | 0.01  |
| 13   | 8  | 0.00  | 0.00  | 0.00  | 0.00  | 0.00  | -0.01 | 0.01  | 0.00  | 0.00  |
| 14   | 6  | -0.03 | 0.20  | 0.01  | -0.04 | 0.23  | 0.02  | 0.00  | 0.01  | 0.00  |
| 15   | 8  | 0.04  | -0.03 | -0.01 | 0.06  | -0.03 | -0.01 | 0.00  | 0.00  | 0.00  |
| 16   | 8  | -0.02 | -0.06 | 0.00  | -0.03 | -0.07 | 0.00  | 0.00  | 0.00  | 0.00  |
| 17   | 1  | 0.39  | -0.35 | -0.07 | 0.46  | -0.41 | -0.09 | 0.00  | 0.00  | 0.00  |
| 18   | 7  | 0.00  | 0.00  | 0.00  | 0.00  | 0.00  | 0.01  | 0.16  | 0.02  | 0.15  |
| 19   | 1  | 0.00  | 0.01  | 0.05  | -0.01 | -0.01 | -0.11 | 0.02  | 0.02  | 0.19  |
| 20   | 7  | 0.00  | 0.00  | 0.00  | 0.00  | 0.00  | 0.00  | 0.01  | -0.02 | -0.14 |
| 21   | 1  | 0.00  | 0.00  | 0.01  | 0.01  | 0.00  | -0.02 | -0.31 | 0.04  | 0.31  |
| 22   | 6  | 0.00  | 0.00  | 0.00  | -0.01 | 0.00  | 0.00  | 0.13  | 0.01  | 0.08  |
| 23   | 1  | -0.01 | 0.00  | 0.00  | 0.01  | 0.00  | 0.01  | -0.62 | -0.02 | -0.12 |

|    |   |       |       |       |       |       |      |       |       |       |
|----|---|-------|-------|-------|-------|-------|------|-------|-------|-------|
| 24 | 6 | 0.00  | 0.00  | 0.00  | 0.00  | 0.00  | 0.00 | -0.08 | 0.01  | 0.07  |
| 25 | 1 | 0.00  | 0.00  | -0.01 | 0.00  | 0.00  | 0.01 | -0.06 | -0.05 | -0.39 |
| 26 | 6 | 0.00  | 0.00  | 0.00  | 0.00  | 0.00  | 0.00 | -0.18 | -0.02 | -0.13 |
| 27 | 1 | 0.00  | 0.00  | 0.00  | -0.01 | 0.00  | 0.00 | 0.07  | -0.03 | -0.20 |
| 28 | 8 | 0.02  | -0.07 | 0.00  | -0.02 | 0.06  | 0.00 | 0.00  | 0.00  | 0.00  |
| 29 | 1 | 0.00  | 0.17  | 0.00  | 0.09  | -0.01 | 0.00 | -0.01 | 0.01  | 0.00  |
| 30 | 1 | -0.49 | -0.38 | -0.11 | 0.40  | 0.31  | 0.09 | 0.01  | 0.00  | 0.00  |

64

A

65

A

66

A

|                |           |           |           |
|----------------|-----------|-----------|-----------|
| Frequencies -- | 1454.4942 | 1502.0561 | 1505.5010 |
| Red. masses -- | 4.1260    | 2.5939    | 2.4600    |
| Frc consts --  | 5.1429    | 3.4480    | 3.2851    |
| IR Inten --    | 24.3309   | 3.8038    | 3.6320    |
| Raman Activ -- | 34.3836   | 4.3616    | 8.3585    |
| Depolar (P) -- | 0.6153    | 0.2903    | 0.2939    |
| Depolar (U) -- | 0.7618    | 0.4499    | 0.4543    |

| Atom | AN | X     | Y     | Z     | X     | Y     | Z     | X     | Y     | Z     |
|------|----|-------|-------|-------|-------|-------|-------|-------|-------|-------|
| 1    | 6  | 0.01  | 0.01  | 0.00  | -0.06 | 0.17  | 0.00  | -0.14 | -0.09 | 0.00  |
| 2    | 6  | 0.00  | 0.00  | 0.00  | -0.09 | -0.09 | 0.00  | 0.14  | -0.06 | 0.00  |
| 3    | 6  | 0.01  | -0.01 | 0.00  | 0.15  | -0.01 | 0.00  | -0.01 | 0.18  | 0.00  |
| 4    | 6  | 0.00  | 0.01  | 0.00  | -0.09 | 0.07  | 0.00  | -0.11 | -0.05 | 0.00  |
| 5    | 1  | -0.03 | -0.01 | 0.00  | 0.11  | 0.20  | 0.00  | 0.49  | 0.27  | -0.01 |
| 6    | 6  | 0.00  | 0.00  | 0.00  | -0.04 | -0.17 | 0.00  | 0.05  | -0.10 | 0.00  |
| 7    | 6  | 0.00  | -0.01 | 0.00  | 0.15  | -0.02 | 0.00  | 0.04  | 0.08  | 0.00  |
| 8    | 1  | -0.03 | 0.01  | 0.00  | -0.42 | 0.34  | -0.01 | 0.13  | 0.03  | 0.00  |
| 9    | 6  | 0.00  | -0.01 | 0.00  | -0.02 | -0.07 | -0.01 | 0.00  | 0.05  | 0.00  |
| 10   | 8  | 0.00  | 0.00  | 0.00  | 0.02  | 0.00  | 0.00  | 0.02  | -0.01 | 0.00  |
| 11   | 6  | -0.02 | 0.00  | 0.00  | 0.01  | 0.02  | -0.02 | 0.00  | 0.02  | 0.03  |
| 12   | 8  | 0.01  | 0.00  | 0.01  | 0.02  | -0.01 | -0.02 | -0.03 | 0.00  | 0.03  |
| 13   | 8  | 0.01  | 0.00  | -0.01 | -0.01 | 0.00  | 0.02  | 0.00  | -0.01 | -0.02 |
| 14   | 6  | 0.00  | 0.00  | 0.00  | 0.00  | 0.01  | 0.00  | 0.01  | -0.08 | 0.00  |
| 15   | 8  | 0.00  | 0.00  | 0.00  | -0.02 | -0.01 | 0.00  | -0.01 | 0.01  | 0.00  |
| 16   | 8  | 0.00  | 0.00  | 0.00  | 0.00  | 0.00  | 0.00  | 0.00  | 0.01  | 0.00  |
| 17   | 1  | 0.00  | 0.00  | 0.00  | -0.01 | 0.01  | 0.00  | -0.05 | 0.04  | 0.01  |
| 18   | 7  | -0.12 | 0.01  | 0.06  | -0.01 | 0.00  | -0.02 | 0.02  | 0.00  | 0.03  |
| 19   | 1  | 0.01  | 0.00  | 0.03  | 0.03  | 0.03  | 0.38  | -0.05 | -0.09 | -0.63 |
| 20   | 7  | 0.07  | 0.00  | 0.00  | 0.00  | 0.00  | 0.01  | 0.00  | 0.00  | -0.01 |
| 21   | 1  | -0.11 | 0.03  | 0.26  | 0.04  | -0.01 | -0.05 | -0.07 | 0.01  | 0.08  |
| 22   | 6  | -0.09 | -0.03 | -0.20 | 0.00  | 0.00  | 0.00  | 0.01  | 0.00  | 0.00  |
| 23   | 1  | 0.21  | -0.02 | -0.15 | 0.02  | 0.00  | 0.00  | -0.04 | 0.00  | -0.01 |
| 24   | 6  | -0.02 | 0.05  | 0.36  | 0.00  | 0.00  | -0.01 | 0.00  | 0.00  | 0.01  |
| 25   | 1  | 0.04  | -0.07 | -0.54 | 0.00  | 0.00  | 0.02  | 0.00  | 0.00  | -0.03 |
| 26   | 6  | 0.20  | -0.02 | -0.19 | 0.01  | 0.00  | 0.01  | -0.01 | 0.00  | -0.02 |
| 27   | 1  | -0.51 | -0.02 | -0.11 | 0.01  | 0.00  | 0.01  | -0.02 | 0.00  | -0.02 |
| 28   | 8  | 0.00  | 0.00  | 0.00  | 0.00  | 0.01  | 0.00  | 0.00  | -0.01 | 0.00  |
| 29   | 1  | 0.00  | 0.00  | 0.00  | -0.02 | 0.60  | -0.01 | 0.08  | 0.33  | 0.00  |
| 30   | 1  | 0.00  | 0.00  | 0.00  | 0.06  | 0.04  | 0.02  | -0.02 | -0.01 | 0.00  |

67

A

68

A

69

A

|                |           |           |           |
|----------------|-----------|-----------|-----------|
| Frequencies -- | 1537.6826 | 1546.9871 | 1590.9958 |
| Red. masses -- | 2.1452    | 2.5815    | 2.6627    |
| Frc consts --  | 2.9884    | 3.6399    | 3.9712    |
| IR Inten --    | 18.1301   | 60.2346   | 18.4715   |
| Raman Activ -- | 10.2354   | 3.9435    | 8.2400    |
| Depolar (P) -- | 0.7498    | 0.2019    | 0.6157    |
| Depolar (U) -- | 0.8570    | 0.3359    | 0.7622    |

| Atom | AN | X     | Y     | Z    | X     | Y     | Z    | X     | Y     | Z    |
|------|----|-------|-------|------|-------|-------|------|-------|-------|------|
| 1    | 6  | -0.03 | -0.06 | 0.00 | 0.01  | 0.04  | 0.00 | 0.00  | 0.01  | 0.00 |
| 2    | 6  | 0.09  | 0.00  | 0.00 | -0.07 | 0.00  | 0.00 | -0.02 | 0.00  | 0.00 |
| 3    | 6  | -0.02 | 0.06  | 0.00 | 0.01  | -0.04 | 0.00 | 0.00  | -0.01 | 0.00 |

|    |   |       |       |       |       |       |       |       |       |       |
|----|---|-------|-------|-------|-------|-------|-------|-------|-------|-------|
| 4  | 6 | -0.04 | -0.03 | 0.00  | 0.03  | 0.02  | 0.00  | 0.01  | 0.01  | 0.00  |
| 5  | 1 | 0.15  | 0.06  | 0.00  | -0.10 | -0.05 | 0.00  | -0.02 | -0.01 | 0.00  |
| 6  | 6 | 0.03  | 0.00  | 0.00  | -0.03 | 0.00  | 0.00  | -0.01 | 0.00  | 0.00  |
| 7  | 6 | -0.03 | 0.03  | 0.00  | 0.03  | -0.02 | 0.00  | 0.01  | -0.01 | 0.00  |
| 8  | 1 | 0.13  | -0.06 | 0.00  | -0.09 | 0.05  | 0.00  | -0.02 | 0.01  | 0.00  |
| 9  | 6 | 0.01  | 0.02  | 0.00  | -0.01 | -0.02 | 0.00  | 0.00  | 0.00  | 0.00  |
| 10 | 8 | 0.00  | 0.00  | 0.00  | 0.00  | 0.00  | 0.00  | 0.00  | 0.00  | 0.00  |
| 11 | 6 | -0.11 | -0.02 | -0.12 | 0.10  | 0.01  | 0.08  | 0.05  | 0.00  | -0.01 |
| 12 | 8 | 0.06  | 0.00  | 0.00  | -0.05 | 0.00  | 0.01  | -0.01 | 0.00  | 0.00  |
| 13 | 8 | -0.01 | 0.01  | 0.06  | 0.00  | 0.00  | -0.03 | -0.01 | 0.00  | 0.01  |
| 14 | 6 | 0.01  | -0.02 | 0.00  | 0.00  | 0.02  | 0.00  | 0.00  | 0.00  | 0.00  |
| 15 | 8 | 0.00  | 0.00  | 0.00  | 0.00  | 0.00  | 0.00  | 0.00  | 0.00  | 0.00  |
| 16 | 8 | 0.00  | 0.00  | 0.00  | 0.00  | 0.00  | 0.00  | 0.00  | 0.00  | 0.00  |
| 17 | 1 | -0.01 | 0.01  | 0.00  | 0.01  | -0.01 | 0.00  | 0.00  | 0.00  | 0.00  |
| 18 | 7 | -0.01 | 0.00  | -0.04 | 0.00  | 0.00  | 0.00  | 0.16  | 0.00  | 0.01  |
| 19 | 1 | 0.06  | 0.10  | 0.75  | -0.07 | -0.09 | -0.67 | -0.05 | -0.03 | -0.20 |
| 20 | 7 | -0.12 | 0.01  | 0.06  | -0.16 | 0.01  | 0.06  | -0.08 | 0.01  | 0.09  |
| 21 | 1 | 0.23  | -0.06 | -0.44 | 0.14  | -0.05 | -0.42 | 0.40  | -0.07 | -0.58 |
| 22 | 6 | 0.12  | 0.00  | -0.03 | 0.22  | 0.00  | 0.01  | -0.09 | -0.02 | -0.14 |
| 23 | 1 | -0.10 | -0.01 | -0.09 | -0.29 | -0.02 | -0.13 | 0.29  | -0.01 | -0.08 |
| 24 | 6 | -0.05 | 0.00  | 0.03  | -0.11 | 0.00  | 0.01  | 0.10  | 0.02  | 0.13  |
| 25 | 1 | -0.05 | -0.01 | -0.08 | -0.12 | -0.02 | -0.12 | 0.16  | -0.02 | -0.20 |
| 26 | 6 | 0.06  | 0.00  | 0.00  | 0.12  | 0.00  | -0.03 | -0.21 | -0.01 | -0.02 |
| 27 | 1 | -0.05 | 0.00  | 0.02  | -0.23 | 0.00  | 0.01  | 0.38  | -0.01 | -0.13 |
| 28 | 8 | 0.00  | 0.00  | 0.00  | 0.00  | 0.00  | 0.00  | 0.00  | 0.00  | 0.00  |
| 29 | 1 | 0.04  | 0.00  | 0.00  | -0.03 | 0.00  | 0.00  | -0.01 | 0.00  | 0.00  |
| 30 | 1 | -0.01 | -0.01 | 0.00  | 0.01  | 0.01  | 0.00  | 0.00  | 0.00  | 0.00  |

70  
A

71  
A

72  
A

|                |           |           |           |
|----------------|-----------|-----------|-----------|
| Frequencies -- | 1657.2191 | 1666.9224 | 1801.8087 |
| Red. masses -- | 7.5034    | 6.3713    | 7.6991    |
| Frc consts --  | 12.1413   | 10.4305   | 14.7268   |
| IR Inten --    | 67.8906   | 6.6709    | 276.2578  |
| Raman Activ -- | 40.1278   | 19.8467   | 24.4109   |
| Depolar (P) -- | 0.7500    | 0.7500    | 0.2354    |
| Depolar (U) -- | 0.8571    | 0.8571    | 0.3810    |

| Atom | AN | X     | Y     | Z     | X     | Y     | Z     | X     | Y     | Z     |
|------|----|-------|-------|-------|-------|-------|-------|-------|-------|-------|
| 1    | 6  | 0.05  | 0.26  | 0.00  | -0.29 | -0.04 | 0.00  | -0.02 | 0.00  | 0.00  |
| 2    | 6  | 0.00  | -0.35 | 0.01  | 0.18  | 0.01  | 0.00  | 0.06  | -0.01 | -0.02 |
| 3    | 6  | -0.07 | 0.26  | 0.00  | -0.28 | 0.03  | 0.00  | -0.02 | 0.00  | 0.00  |
| 4    | 6  | -0.10 | -0.23 | 0.00  | 0.33  | 0.13  | 0.00  | 0.01  | 0.00  | 0.00  |
| 5    | 1  | 0.28  | -0.06 | 0.00  | -0.43 | -0.28 | 0.01  | -0.02 | -0.01 | 0.00  |
| 6    | 6  | 0.00  | 0.42  | 0.00  | -0.18 | -0.01 | 0.00  | 0.00  | 0.00  | 0.00  |
| 7    | 6  | 0.13  | -0.25 | 0.00  | 0.31  | -0.12 | 0.00  | 0.01  | -0.01 | 0.00  |
| 8    | 1  | -0.32 | -0.01 | 0.00  | -0.34 | 0.29  | -0.01 | -0.02 | 0.01  | 0.00  |
| 9    | 6  | 0.01  | -0.05 | 0.00  | -0.02 | 0.02  | -0.01 | 0.05  | -0.01 | 0.01  |
| 10   | 8  | -0.01 | 0.01  | 0.00  | 0.04  | -0.01 | 0.01  | -0.03 | 0.00  | -0.01 |
| 11   | 6  | 0.00  | 0.04  | -0.01 | -0.04 | -0.01 | -0.05 | -0.30 | 0.09  | 0.54  |
| 12   | 8  | 0.00  | 0.00  | 0.00  | 0.01  | 0.00  | 0.01  | -0.01 | -0.01 | -0.10 |
| 13   | 8  | 0.00  | -0.01 | 0.01  | -0.01 | 0.00  | 0.02  | 0.19  | -0.05 | -0.32 |
| 14   | 6  | -0.02 | -0.05 | 0.00  | -0.02 | -0.01 | 0.01  | 0.04  | 0.00  | 0.00  |
| 15   | 8  | 0.01  | 0.01  | 0.00  | 0.04  | 0.01  | -0.01 | -0.02 | 0.00  | 0.00  |
| 16   | 8  | 0.00  | 0.00  | 0.00  | 0.00  | 0.00  | 0.00  | 0.00  | 0.00  | 0.00  |
| 17   | 1  | -0.03 | 0.02  | 0.01  | -0.01 | 0.00  | 0.00  | 0.02  | -0.01 | 0.00  |
| 18   | 7  | 0.00  | 0.00  | 0.00  | -0.01 | 0.00  | 0.00  | 0.03  | 0.00  | 0.00  |
| 19   | 1  | 0.00  | -0.04 | 0.01  | 0.01  | 0.01  | 0.05  | 0.14  | 0.07  | 0.57  |
| 20   | 7  | 0.00  | 0.00  | 0.00  | 0.01  | 0.00  | -0.01 | -0.01 | 0.00  | 0.03  |
| 21   | 1  | 0.00  | -0.01 | 0.01  | -0.02 | 0.01  | 0.04  | 0.13  | -0.04 | -0.28 |
| 22   | 6  | 0.00  | 0.00  | 0.00  | 0.00  | 0.00  | 0.01  | 0.01  | 0.00  | -0.02 |
| 23   | 1  | 0.00  | 0.00  | 0.00  | -0.01 | 0.00  | 0.00  | 0.03  | 0.00  | -0.02 |

|                |    |           |       |       |       |           |       |       |       |           |       |
|----------------|----|-----------|-------|-------|-------|-----------|-------|-------|-------|-----------|-------|
| 24             | 6  | 0.00      | 0.00  | 0.00  | 0.00  | 0.00      | 0.00  | 0.00  | 0.00  | 0.00      | 0.00  |
| 25             | 1  | 0.00      | 0.00  | 0.00  | 0.00  | 0.00      | 0.00  | 0.01  | 0.00  | 0.00      | -0.02 |
| 26             | 6  | 0.00      | 0.00  | 0.00  | 0.01  | 0.00      | 0.00  | -0.02 | 0.00  | 0.00      | 0.00  |
| 27             | 1  | 0.00      | 0.00  | 0.00  | -0.01 | 0.00      | 0.00  | 0.02  | 0.00  | -0.01     | 0.00  |
| 28             | 8  | 0.00      | 0.00  | 0.00  | 0.00  | 0.00      | 0.00  | 0.00  | 0.00  | 0.00      | 0.00  |
| 29             | 1  | -0.03     | -0.47 | 0.00  | -0.21 | 0.03      | 0.00  | -0.01 | 0.00  | 0.00      | 0.00  |
| 30             | 1  | 0.03      | 0.02  | 0.01  | -0.01 | 0.00      | 0.00  | 0.02  | 0.02  | 0.01      | 0.00  |
|                |    | 73        |       |       | 74    |           |       | 75    |       |           |       |
|                |    | A         |       |       | A     |           |       | A     |       |           |       |
| Frequencies -- |    | 1847.9354 |       |       |       | 1861.1166 |       |       |       | 3028.6340 |       |
| Red. masses -- |    | 10.4904   |       |       |       | 10.4408   |       |       |       | 1.0745    |       |
| Frc consts --  |    | 21.1064   |       |       |       | 21.3074   |       |       |       | 5.8072    |       |
| IR Inten --    |    | 29.5365   |       |       |       | 744.7051  |       |       |       | 2777.4662 |       |
| Raman Activ -- |    | 25.6960   |       |       |       | 95.0616   |       |       |       | 487.5985  |       |
| Depolar (P) -- |    | 0.7500    |       |       |       | 0.0956    |       |       |       | 0.3339    |       |
| Depolar (U) -- |    | 0.8571    |       |       |       | 0.1746    |       |       |       | 0.5007    |       |
| Atom           | AN | X         | Y     | Z     | X     | Y         | Z     | X     | Y     | Z         |       |
| 1              | 6  | 0.06      | -0.01 | 0.00  | -0.08 | 0.03      | -0.01 | 0.00  | 0.00  | 0.00      | 0.00  |
| 2              | 6  | 0.00      | -0.01 | 0.00  | 0.03  | 0.00      | 0.00  | 0.00  | 0.00  | 0.00      | 0.00  |
| 3              | 6  | -0.06     | -0.01 | 0.00  | -0.08 | -0.02     | 0.00  | 0.00  | 0.00  | 0.00      | 0.00  |
| 4              | 6  | 0.00      | -0.02 | 0.00  | 0.02  | 0.00      | 0.00  | 0.00  | 0.00  | 0.00      | 0.00  |
| 5              | 1  | 0.01      | -0.03 | 0.00  | -0.01 | -0.03     | 0.00  | 0.00  | 0.00  | 0.00      | 0.00  |
| 6              | 6  | 0.00      | 0.03  | 0.00  | -0.01 | 0.00      | 0.00  | 0.00  | 0.00  | 0.00      | 0.00  |
| 7              | 6  | 0.00      | -0.02 | 0.00  | 0.02  | 0.00      | 0.00  | 0.00  | 0.00  | 0.00      | 0.00  |
| 8              | 1  | -0.01     | -0.03 | 0.00  | -0.01 | 0.03      | 0.00  | 0.00  | 0.00  | 0.00      | 0.00  |
| 9              | 6  | -0.50     | 0.11  | -0.09 | 0.50  | -0.11     | 0.09  | 0.00  | 0.00  | 0.00      | 0.00  |
| 10             | 8  | 0.32      | -0.05 | 0.06  | -0.31 | 0.05      | -0.06 | 0.00  | 0.00  | 0.00      | 0.00  |
| 11             | 6  | 0.00      | 0.02  | 0.01  | 0.05  | -0.01     | -0.05 | 0.00  | 0.00  | -0.01     | 0.00  |
| 12             | 8  | 0.00      | -0.01 | 0.00  | -0.01 | 0.00      | 0.01  | -0.06 | 0.00  | 0.00      | 0.01  |
| 13             | 8  | 0.00      | -0.01 | 0.00  | -0.03 | 0.01      | 0.04  | 0.00  | 0.00  | 0.00      | 0.01  |
| 14             | 6  | 0.52      | 0.07  | -0.07 | 0.51  | 0.08      | -0.07 | 0.00  | 0.00  | 0.00      | 0.00  |
| 15             | 8  | -0.33     | -0.03 | 0.05  | -0.32 | -0.03     | 0.05  | 0.00  | 0.00  | 0.00      | 0.00  |
| 16             | 8  | -0.05     | 0.00  | 0.01  | -0.05 | 0.00      | 0.01  | 0.00  | 0.00  | 0.00      | 0.00  |
| 17             | 1  | 0.25      | -0.21 | -0.05 | 0.24  | -0.20     | -0.05 | 0.00  | 0.00  | 0.00      | 0.00  |
| 18             | 7  | 0.00      | 0.00  | 0.00  | 0.00  | 0.00      | 0.00  | 0.00  | 0.00  | 0.00      | 0.00  |
| 19             | 1  | 0.00      | 0.04  | 0.00  | -0.02 | -0.01     | -0.09 | 0.99  | -0.02 | -0.04     | -0.04 |
| 20             | 7  | 0.00      | 0.00  | 0.00  | 0.00  | 0.00      | 0.00  | 0.01  | 0.00  | 0.01      | 0.01  |
| 21             | 1  | 0.00      | 0.02  | -0.01 | -0.02 | 0.01      | 0.04  | -0.04 | -0.01 | -0.05     | -0.05 |
| 22             | 6  | 0.00      | 0.00  | 0.00  | 0.00  | 0.00      | 0.00  | 0.00  | 0.00  | 0.00      | 0.00  |
| 23             | 1  | 0.00      | 0.00  | 0.00  | 0.00  | 0.00      | 0.00  | 0.00  | 0.00  | 0.00      | 0.00  |
| 24             | 6  | 0.00      | 0.00  | 0.00  | 0.00  | 0.00      | 0.00  | 0.00  | 0.00  | 0.00      | 0.00  |
| 25             | 1  | 0.00      | 0.00  | 0.00  | 0.00  | 0.00      | 0.00  | 0.00  | 0.00  | 0.00      | 0.00  |
| 26             | 6  | 0.00      | 0.00  | 0.00  | 0.00  | 0.00      | 0.00  | 0.00  | 0.00  | 0.00      | 0.00  |
| 27             | 1  | 0.00      | 0.00  | 0.00  | 0.00  | 0.00      | 0.00  | 0.00  | 0.00  | 0.00      | -0.02 |
| 28             | 8  | 0.04      | 0.00  | 0.01  | -0.04 | 0.00      | -0.01 | 0.00  | 0.00  | 0.00      | 0.00  |
| 29             | 1  | 0.00      | -0.03 | 0.00  | -0.01 | 0.00      | 0.00  | 0.00  | 0.00  | 0.00      | 0.00  |
| 30             | 1  | -0.26     | -0.19 | -0.06 | 0.25  | 0.19      | 0.06  | 0.00  | 0.00  | 0.00      | 0.00  |
|                |    | 76        |       |       | 77    |           |       | 78    |       |           |       |
|                |    | A         |       |       | A     |           |       | A     |       |           |       |
| Frequencies -- |    | 3215.7144 |       |       |       | 3238.2455 |       |       |       | 3247.8452 |       |
| Red. masses -- |    | 1.0893    |       |       |       | 1.0938    |       |       |       | 1.0949    |       |
| Frc consts --  |    | 6.6365    |       |       |       | 6.7576    |       |       |       | 6.8046    |       |
| IR Inten --    |    | 4.5602    |       |       |       | 1.3300    |       |       |       | 1.7735    |       |
| Raman Activ -- |    | 82.5126   |       |       |       | 103.0388  |       |       |       | 145.8926  |       |
| Depolar (P) -- |    | 0.5224    |       |       |       | 0.2958    |       |       |       | 0.1529    |       |
| Depolar (U) -- |    | 0.6863    |       |       |       | 0.4566    |       |       |       | 0.2652    |       |
| Atom           | AN | X         | Y     | Z     | X     | Y         | Z     | X     | Y     | Z         |       |
| 1              | 6  | 0.00      | 0.00  | 0.00  | 0.00  | 0.00      | 0.00  | 0.00  | 0.00  | 0.00      | 0.00  |
| 2              | 6  | 0.00      | 0.00  | 0.00  | 0.00  | 0.00      | 0.00  | 0.00  | 0.00  | 0.00      | 0.00  |
| 3              | 6  | 0.00      | 0.00  | 0.00  | 0.00  | 0.00      | 0.00  | 0.00  | 0.00  | 0.00      | 0.00  |

|    |   |       |       |      |       |       |       |       |       |      |
|----|---|-------|-------|------|-------|-------|-------|-------|-------|------|
| 4  | 6 | 0.01  | -0.01 | 0.00 | 0.01  | -0.02 | 0.00  | 0.04  | -0.07 | 0.00 |
| 5  | 1 | -0.11 | 0.20  | 0.00 | -0.12 | 0.23  | 0.00  | -0.43 | 0.83  | 0.00 |
| 6  | 6 | -0.08 | 0.00  | 0.00 | -0.03 | 0.01  | 0.00  | 0.03  | 0.00  | 0.00 |
| 7  | 6 | 0.02  | 0.02  | 0.00 | -0.04 | -0.07 | 0.00  | 0.01  | 0.01  | 0.00 |
| 8  | 1 | -0.18 | -0.29 | 0.00 | 0.48  | 0.79  | -0.01 | -0.09 | -0.15 | 0.00 |
| 9  | 6 | 0.00  | 0.00  | 0.00 | 0.00  | 0.00  | 0.00  | 0.00  | 0.00  | 0.00 |
| 10 | 8 | 0.00  | 0.00  | 0.00 | 0.00  | 0.00  | 0.00  | 0.00  | 0.00  | 0.00 |
| 11 | 6 | 0.00  | 0.00  | 0.00 | 0.00  | 0.00  | 0.00  | 0.00  | 0.00  | 0.00 |
| 12 | 8 | 0.00  | 0.00  | 0.00 | 0.00  | 0.00  | 0.00  | 0.00  | 0.00  | 0.00 |
| 13 | 8 | 0.00  | 0.00  | 0.00 | 0.00  | 0.00  | 0.00  | 0.00  | 0.00  | 0.00 |
| 14 | 6 | 0.00  | 0.00  | 0.00 | 0.00  | 0.00  | 0.00  | 0.00  | 0.00  | 0.00 |
| 15 | 8 | 0.00  | 0.00  | 0.00 | 0.00  | 0.00  | 0.00  | 0.00  | 0.00  | 0.00 |
| 16 | 8 | 0.00  | 0.00  | 0.00 | 0.00  | 0.00  | 0.00  | 0.00  | 0.00  | 0.00 |
| 17 | 1 | 0.00  | 0.00  | 0.00 | 0.00  | 0.00  | 0.00  | 0.00  | 0.00  | 0.00 |
| 18 | 7 | 0.00  | 0.00  | 0.00 | 0.00  | 0.00  | 0.00  | 0.00  | 0.00  | 0.00 |
| 19 | 1 | 0.00  | 0.00  | 0.00 | 0.00  | 0.00  | 0.00  | 0.00  | 0.00  | 0.00 |
| 20 | 7 | 0.00  | 0.00  | 0.00 | 0.00  | 0.00  | 0.00  | 0.00  | 0.00  | 0.00 |
| 21 | 1 | 0.00  | 0.00  | 0.00 | 0.00  | 0.00  | 0.00  | 0.00  | 0.00  | 0.00 |
| 22 | 6 | 0.00  | 0.00  | 0.00 | 0.00  | 0.00  | 0.00  | 0.00  | 0.00  | 0.00 |
| 23 | 1 | 0.00  | 0.00  | 0.00 | 0.00  | 0.00  | 0.00  | 0.00  | 0.00  | 0.00 |
| 24 | 6 | 0.00  | 0.00  | 0.00 | 0.00  | 0.00  | 0.00  | 0.00  | 0.00  | 0.00 |
| 25 | 1 | 0.00  | 0.00  | 0.00 | 0.00  | 0.00  | 0.00  | 0.00  | 0.00  | 0.00 |
| 26 | 6 | 0.00  | 0.00  | 0.00 | 0.00  | 0.00  | 0.00  | 0.00  | 0.00  | 0.00 |
| 27 | 1 | 0.00  | 0.00  | 0.00 | 0.00  | 0.00  | 0.00  | 0.00  | 0.00  | 0.00 |
| 28 | 8 | 0.00  | 0.00  | 0.00 | 0.00  | 0.00  | 0.00  | 0.00  | 0.00  | 0.00 |
| 29 | 1 | 0.91  | -0.03 | 0.00 | 0.27  | -0.01 | 0.00  | -0.30 | 0.01  | 0.00 |
| 30 | 1 | 0.00  | 0.00  | 0.00 | 0.00  | 0.00  | 0.00  | 0.00  | 0.00  | 0.00 |

79

80

81

A

A

A

|                |           |           |           |
|----------------|-----------|-----------|-----------|
| Frequencies -- | 3266.6606 | 3281.1495 | 3297.7933 |
| Red. masses -- | 1.0936    | 1.0957    | 1.1083    |
| Frc consts --  | 6.8755    | 6.9500    | 7.1013    |
| IR Inten --    | 2.5810    | 0.6993    | 0.0027    |
| Raman Activ -- | 79.4813   | 57.1616   | 173.4142  |
| Depolar (P) -- | 0.5629    | 0.5974    | 0.1211    |
| Depolar (U) -- | 0.7204    | 0.7480    | 0.2160    |

| Atom | AN | X     | Y    | Z     | X     | Y     | Z     | X     | Y     | Z     |
|------|----|-------|------|-------|-------|-------|-------|-------|-------|-------|
| 1    | 6  | 0.00  | 0.00 | 0.00  | 0.00  | 0.00  | 0.00  | 0.00  | 0.00  | 0.00  |
| 2    | 6  | 0.00  | 0.00 | 0.00  | 0.00  | 0.00  | 0.00  | 0.00  | 0.00  | 0.00  |
| 3    | 6  | 0.00  | 0.00 | 0.00  | 0.00  | 0.00  | 0.00  | 0.00  | 0.00  | 0.00  |
| 4    | 6  | 0.00  | 0.00 | 0.00  | 0.00  | 0.00  | 0.00  | 0.00  | 0.00  | 0.00  |
| 5    | 1  | 0.00  | 0.00 | 0.00  | 0.00  | 0.00  | 0.00  | 0.00  | 0.00  | 0.00  |
| 6    | 6  | 0.00  | 0.00 | 0.00  | 0.00  | 0.00  | 0.00  | 0.00  | 0.00  | 0.00  |
| 7    | 6  | 0.00  | 0.00 | 0.00  | 0.00  | 0.00  | 0.00  | 0.00  | 0.00  | 0.00  |
| 8    | 1  | 0.00  | 0.00 | 0.00  | 0.00  | 0.00  | 0.00  | 0.00  | 0.00  | 0.00  |
| 9    | 6  | 0.00  | 0.00 | 0.00  | 0.00  | 0.00  | 0.00  | 0.00  | 0.00  | 0.00  |
| 10   | 8  | 0.00  | 0.00 | 0.00  | 0.00  | 0.00  | 0.00  | 0.00  | 0.00  | 0.00  |
| 11   | 6  | 0.00  | 0.00 | 0.00  | 0.00  | 0.00  | 0.00  | 0.00  | 0.00  | 0.00  |
| 12   | 8  | 0.00  | 0.00 | 0.00  | 0.00  | 0.00  | 0.00  | 0.00  | 0.00  | 0.00  |
| 13   | 8  | 0.00  | 0.00 | 0.00  | 0.00  | 0.00  | 0.00  | 0.00  | 0.00  | 0.00  |
| 14   | 6  | 0.00  | 0.00 | 0.00  | 0.00  | 0.00  | 0.00  | 0.00  | 0.00  | 0.00  |
| 15   | 8  | 0.00  | 0.00 | 0.00  | 0.00  | 0.00  | 0.00  | 0.00  | 0.00  | 0.00  |
| 16   | 8  | 0.00  | 0.00 | 0.00  | 0.00  | 0.00  | 0.00  | 0.00  | 0.00  | 0.00  |
| 17   | 1  | 0.00  | 0.00 | 0.00  | 0.00  | 0.00  | 0.00  | 0.00  | 0.00  | 0.00  |
| 18   | 7  | 0.00  | 0.00 | 0.00  | 0.00  | 0.00  | 0.00  | 0.00  | 0.00  | 0.00  |
| 19   | 1  | -0.02 | 0.00 | 0.00  | 0.01  | 0.00  | 0.00  | 0.01  | 0.00  | 0.00  |
| 20   | 7  | 0.00  | 0.00 | 0.00  | 0.00  | 0.00  | 0.00  | 0.00  | 0.00  | 0.00  |
| 21   | 1  | 0.00  | 0.00 | 0.00  | 0.00  | 0.00  | -0.01 | 0.01  | 0.00  | 0.01  |
| 22   | 6  | 0.00  | 0.00 | -0.01 | 0.02  | -0.01 | -0.06 | -0.01 | 0.01  | 0.06  |
| 23   | 1  | -0.04 | 0.02 | 0.14  | -0.18 | 0.09  | 0.67  | 0.18  | -0.08 | -0.66 |



|    |   |       |       |       |       |      |       |       |      |       |
|----|---|-------|-------|-------|-------|------|-------|-------|------|-------|
| 24 | 6 | -0.04 | 0.00  | -0.01 | -0.05 | 0.00 | 0.00  | -0.07 | 0.00 | -0.01 |
| 25 | 1 | 0.42  | 0.01  | 0.03  | 0.59  | 0.01 | 0.04  | 0.68  | 0.02 | 0.05  |
| 26 | 6 | 0.01  | 0.01  | 0.08  | 0.00  | 0.00 | -0.04 | 0.00  | 0.00 | -0.02 |
| 27 | 1 | -0.14 | -0.12 | -0.87 | 0.06  | 0.05 | 0.38  | 0.03  | 0.03 | 0.21  |
| 28 | 8 | 0.00  | 0.00  | 0.00  | 0.00  | 0.00 | 0.00  | 0.00  | 0.00 | 0.00  |
| 29 | 1 | 0.00  | 0.00  | 0.00  | 0.00  | 0.00 | 0.00  | 0.00  | 0.00 | 0.00  |
| 30 | 1 | 0.00  | 0.00  | 0.00  | 0.00  | 0.00 | 0.00  | 0.00  | 0.00 | 0.00  |

82

83

84

A

A

A

|                |           |           |           |
|----------------|-----------|-----------|-----------|
| Frequencies -- | 3477.0674 | 3852.3619 | 3853.6365 |
| Red. masses -- | 1.0874    | 1.0647    | 1.0648    |
| Frc consts --  | 7.7458    | 9.3100    | 9.3165    |
| IR Inten --    | 972.0908  | 148.0809  | 90.7402   |
| Raman Activ -- | 186.0570  | 92.1618   | 153.9378  |
| Depolar (P) -- | 0.2455    | 0.2643    | 0.2543    |
| Depolar (U) -- | 0.3942    | 0.4181    | 0.4055    |

| Atom | AN | X     | Y     | Z     | X     | Y     | Z     | X     | Y     | Z     |
|------|----|-------|-------|-------|-------|-------|-------|-------|-------|-------|
| 1    | 6  | 0.00  | 0.00  | 0.00  | 0.00  | 0.00  | 0.00  | 0.00  | 0.00  | 0.00  |
| 2    | 6  | 0.00  | 0.00  | 0.00  | 0.00  | 0.00  | 0.00  | 0.00  | 0.00  | 0.00  |
| 3    | 6  | 0.00  | 0.00  | 0.00  | 0.00  | 0.00  | 0.00  | 0.00  | 0.00  | 0.00  |
| 4    | 6  | 0.00  | 0.00  | 0.00  | 0.00  | 0.00  | 0.00  | 0.00  | 0.00  | 0.00  |
| 5    | 1  | 0.00  | 0.00  | 0.00  | 0.00  | 0.00  | 0.00  | 0.00  | 0.00  | 0.00  |
| 6    | 6  | 0.00  | 0.00  | 0.00  | 0.00  | 0.00  | 0.00  | 0.00  | 0.00  | 0.00  |
| 7    | 6  | 0.00  | 0.00  | 0.00  | 0.00  | 0.00  | 0.00  | 0.00  | 0.00  | 0.00  |
| 8    | 1  | 0.00  | 0.00  | 0.00  | 0.00  | 0.00  | 0.00  | 0.00  | 0.00  | 0.00  |
| 9    | 6  | 0.00  | 0.00  | 0.00  | 0.00  | 0.00  | 0.00  | 0.00  | 0.00  | 0.00  |
| 10   | 8  | 0.00  | 0.00  | 0.00  | 0.00  | 0.00  | 0.00  | 0.00  | 0.00  | 0.00  |
| 11   | 6  | 0.00  | 0.00  | 0.00  | 0.00  | 0.00  | 0.00  | 0.00  | 0.00  | 0.00  |
| 12   | 8  | 0.00  | 0.00  | 0.00  | 0.00  | 0.00  | 0.00  | 0.00  | 0.00  | 0.00  |
| 13   | 8  | 0.00  | 0.00  | 0.00  | 0.00  | 0.00  | 0.00  | 0.00  | 0.00  | 0.00  |
| 14   | 6  | 0.00  | 0.00  | 0.00  | 0.00  | 0.00  | 0.00  | 0.00  | 0.00  | 0.00  |
| 15   | 8  | 0.00  | 0.00  | 0.00  | 0.00  | 0.00  | 0.00  | 0.00  | 0.00  | 0.00  |
| 16   | 8  | 0.00  | 0.00  | 0.00  | 0.00  | -0.01 | 0.00  | -0.04 | -0.05 | 0.00  |
| 17   | 1  | 0.00  | 0.00  | 0.00  | 0.08  | 0.11  | -0.01 | 0.57  | 0.81  | -0.05 |
| 18   | 7  | 0.00  | 0.00  | 0.00  | 0.00  | 0.00  | 0.00  | 0.00  | 0.00  | 0.00  |
| 19   | 1  | 0.06  | 0.00  | 0.00  | 0.00  | 0.00  | 0.00  | 0.00  | 0.00  | 0.00  |
| 20   | 7  | -0.07 | -0.01 | -0.04 | 0.00  | 0.00  | 0.00  | 0.00  | 0.00  | 0.00  |
| 21   | 1  | 0.82  | 0.08  | 0.56  | 0.00  | 0.00  | 0.00  | 0.00  | 0.00  | 0.00  |
| 22   | 6  | 0.00  | 0.00  | 0.00  | 0.00  | 0.00  | 0.00  | 0.00  | 0.00  | 0.00  |
| 23   | 1  | -0.01 | 0.00  | 0.01  | 0.00  | 0.00  | 0.00  | 0.00  | 0.00  | 0.00  |
| 24   | 6  | 0.00  | 0.00  | 0.00  | 0.00  | 0.00  | 0.00  | 0.00  | 0.00  | 0.00  |
| 25   | 1  | 0.00  | 0.00  | 0.00  | 0.00  | 0.00  | 0.00  | 0.00  | 0.00  | 0.00  |
| 26   | 6  | 0.00  | 0.00  | 0.00  | 0.00  | 0.00  | 0.00  | 0.00  | 0.00  | 0.00  |
| 27   | 1  | 0.00  | 0.00  | 0.00  | 0.00  | 0.00  | 0.00  | 0.00  | 0.00  | 0.00  |
| 28   | 8  | 0.00  | 0.00  | 0.00  | 0.03  | -0.05 | 0.00  | 0.00  | 0.01  | 0.00  |
| 29   | 1  | 0.00  | 0.00  | 0.00  | 0.00  | 0.00  | 0.00  | 0.00  | 0.00  | 0.00  |
| 30   | 1  | 0.00  | 0.00  | 0.00  | -0.51 | 0.84  | -0.07 | 0.07  | -0.12 | 0.01  |
